# Supplementary material
Source: HighWire-hosted journal article supplement (doi:10.1101/rna.079721.123)
Supplement: Supplemental_Table_S1.xlsx [file Supplemental_Table_S1.xlsx]

## Sheet: README
Analysis of programmed frameshifting during translation of prfB in Flavobacterium johnsoniae
Fawwaz M. Naeem, Bryan T. Gemler, Zakkary A. McNutt, Ralf Bundschuh, and Kurt Fredrick
prfB FS SD Tab
Accession	The NCBI RefSEQ genome accession
Species	GTDB species name
Genus	GTDB genus name
Family	GTDB family name
Order	GTDB order name
Class	GTDB class name
Phylum	GTDB phylum name
Domain	GTDB domain name
Identified prfB Annotation	TRUE if ARFA annotated a prfB CDS in the genome, else FALSE
prfB Annotation has RF2 ORF0 (Frameshift)	TRUE if ARFA annotated a prfB RF2 ORF0 component, else FALSE
prfB RF2 ORF0 E-value	E-value of prfB RF2 ORF0 annotation
prfB Frameshifting Call	TRUE if ARFA annotated a prfB CDS with RF2 ORF0 component with e-value =< 0.1, else FALSE
Number of Unique ASDs	The number of unique ASDs identified through 16S annotation and motif finding approach
Unique ASD (If N = 1)	The unique ASD sequence if only 1 unique ASD is detected
SD Sequence Region	The region upstream of the prfB FS site where the ASD is screened using free_scan tool
SD dG (kcal/mol)	The free_scan tool free energy (kcal/mol)
Seqlogo Data
Species	GTDB species name
Contains prfB FS Site	TRUE if ARFA annotated a prfB CDS with RF2 ORF0 component with e-value =< 0.1, else FALSE
Nuc Sequence	Portion of sequence from nucleotide MSA
Prot Sequence	Portion of sequence from protein MSA
Plasmid List
Plasmid name	Plasmid name
Fusion name	Name of the fusion, if applicable
Description	Description of the plasmid and any mutations
Reference	Reference of plasmid
Genome SD Analysis
Acc	The NCBI RefSEQ genome accession
Species	GTDB species name
Genus	GTDB genus name
Family	GTDB family name
Order	GTDB order name
Class	GTDB class name
Phylum	GTDB phylum name
Domain	GTDB domain name
Average SD Strength ( )	Mean dG value of all SD-ASD interactions minus the mean dG value of all MSD-ASD interactions
Fraction SD Usage (FSD)	Fraction of SDs minus fraction of MSDs below an energy threshold, in our case -4 kcal/mol
FE Data Tabs
Fig2C data tab	raw FE values for Fig. 2C
Fig2D data tab	raw FE values for Fig. 2D
Fig3 data tab	raw FE values for Fig. 3
Fig4 data tab	raw FE values for Fig. 4
FigS7B data tab	raw FE values for Fig. S7B

## Sheet: prfB FS SD
Accession	Species	Genus	Family	Order	Class	Phylum	Domain	Identified prfB Annotation	prfB Annotation has RF2 ORF0 (Frameshift)	prfB RF2 ORF0 E-value	prfB Frameshifting Call	Number of Unique ASDs	Unique ASD (If N = 1)	SD Sequence Region	SD dG (kcal/mol)
GCF_009883795.1	s__coxiella sp009883795	g__coxiella	f__coxiellaceae	o__coxiellales	c__gammaproteobacteria	p__proteobacteria	d__bacteria	TRUE	TRUE	0.0022	TRUE	1	GATCACCTCCTTAAA	CGAGATTTGAGGAGGTGTCTTTGA	-16.9349
GCF_900186835.1	s__pasteurella dagmatis	g__pasteurella	f__pasteurellaceae	o__enterobacterales	c__gammaproteobacteria	p__proteobacteria	d__bacteria	TRUE	TRUE	1.8e-10	TRUE	1	GATCACCTCCTTAAC	CAAGTGTTGAGGGGGTATCTTTGA	-15.3872
GCF_002736205.1	s__pedobacter ginsengisoli	g__pedobacter	f__sphingobacteriaceae	o__sphingobacteriales	c__bacteroidia	p__bacteroidota	d__bacteria	TRUE	TRUE	5e-05	TRUE	1	GAATACCTCCTTTCT	GCGTCGCTGAGGAGGTATCTTTGA	-13.947
GCF_900564155.1	s__pedobacter sp900564155	g__pedobacter	f__sphingobacteriaceae	o__sphingobacteriales	c__bacteroidia	p__bacteroidota	d__bacteria	TRUE	TRUE	3.2e-05	TRUE	1	GAATACCTCCTTTCT	GCGTCGCTGAGGAGGTATCTTTGA	-13.947
GCF_014395225.1	s__pedobacter roseus	g__pedobacter	f__sphingobacteriaceae	o__sphingobacteriales	c__bacteroidia	p__bacteroidota	d__bacteria	TRUE	TRUE	1e-05	TRUE	1	GAATACCTCCTTTCT	ACGTCGCTGAGGAGGTATCTTTGA	-13.947
GCF_014692875.1	s__pedobacter sp011759615	g__pedobacter	f__sphingobacteriaceae	o__sphingobacteriales	c__bacteroidia	p__bacteroidota	d__bacteria	TRUE	TRUE	7.3e-05	TRUE	1	GAATACCTCCTTTCT	ACGTCGCTGAGGAGGTATCTTTGA	-13.947
GCF_000217795.1	s__thermodesulfatator indicus	g__thermodesulfatator	f__thermodesulfatatoraceae	o__thermodesulfobacteriales	c__thermodesulfobacteria	p__desulfobacterota	d__bacteria	TRUE	TRUE	1.8e-05	TRUE	1	GATCACCTCCTTTCT	TCAAGTTTAAGGAGGTGTCTTTGA	-13.7422
GCF_012317585.1	s__thermosulfurimonas_a marina	g__thermosulfurimonas_a	f__thermodesulfobacteriaceae	o__thermodesulfobacteriales	c__thermodesulfobacteria	p__desulfobacterota	d__bacteria	TRUE	TRUE	0.0014	TRUE	1	GATCACCTCCTTTCT	GCCGATCTAAGGAGGTGTCTTTGA	-13.7422
GCF_000020565.1	s__amoebophilus asiaticus	g__amoebophilus	f__amoebophilaceae	o__cytophagales	c__bacteroidia	p__bacteroidota	d__bacteria	TRUE	TRUE	0.012	TRUE	1	GAATACCTCCTTTAA	AATGATTTAAGGAGGTATCTTTGA	-13.6128
GCF_011303555.1	s__pedobacter sp003852395	g__pedobacter	f__sphingobacteriaceae	o__sphingobacteriales	c__bacteroidia	p__bacteroidota	d__bacteria	TRUE	TRUE	1.3e-05	TRUE	1	GAATACCTCCTTTCT	ACGTCTCTAAGGAGGTATCTTTGA	-13.6128
GCF_005938645.2	s__pedobacter sp005938645	g__pedobacter	f__sphingobacteriaceae	o__sphingobacteriales	c__bacteroidia	p__bacteroidota	d__bacteria	TRUE	TRUE	1e-05	TRUE	1	GAATACCTCCTTTCT	ACGTCTCTAAGGAGGTATCTTTGA	-13.6128
GCF_000212735.1	s__haliscomenobacter hydrossis	g__haliscomenobacter	f__saprospiraceae	o__chitinophagales	c__bacteroidia	p__bacteroidota	d__bacteria	TRUE	TRUE	0.0057	TRUE	1	GAATACCTCCTTTTA	GTGAGTTTGGGGAGGTATCTTTGA	-13.2334
GCF_001548275.1	s__caldimicrobium thiodismutans	g__caldimicrobium	f__thermodesulfobacteriaceae	o__thermodesulfobacteriales	c__thermodesulfobacteria	p__desulfobacterota	d__bacteria	TRUE	TRUE	0.00055	TRUE	1	GATCACCTCCTTTCA	TCTGATTTAAGGGGGTGTCTTTGA	-12.968
GCF_000734015.1	s__thermodesulfobacterium commune	g__thermodesulfobacterium	f__thermodesulfobacteriaceae	o__thermodesulfobacteriales	c__thermodesulfobacteria	p__desulfobacterota	d__bacteria	TRUE	TRUE	0.027	TRUE	1	GATCACCTCCTTTCT	CAAGATTTAAGGGGGTGTCTTTGA	-12.968
GCF_008630935.1	s__thermodesulfobacterium sp008630935	g__thermodesulfobacterium	f__thermodesulfobacteriaceae	o__thermodesulfobacteriales	c__thermodesulfobacteria	p__desulfobacterota	d__bacteria	TRUE	TRUE	0.025	TRUE	1	GATCACCTCCTTTCT	GAGGATTTAAGGGGGTGTCTTTGA	-12.968
GCF_000215975.1	s__thermodesulfobacterium geofontis	g__thermodesulfobacterium	f__thermodesulfobacteriaceae	o__thermodesulfobacteriales	c__thermodesulfobacteria	p__desulfobacterota	d__bacteria	TRUE	TRUE	0.0011	TRUE	1	GATCACCTCCTTTCT	GAAGATTTAAGGGGGTGTCTTTGA	-12.968
GCF_000023825.1	s__pedobacter heparinus	g__pedobacter	f__sphingobacteriaceae	o__sphingobacteriales	c__bacteroidia	p__bacteroidota	d__bacteria	TRUE	TRUE	5e-05	TRUE	1	GAATACCTCCTTTCT	GCGTCGCTGAGGAGGTACCTTTGA	-12.848
GCF_002863865.1	s__ketobacter alkanivorans	g__ketobacter	f__ketobacteraceae	o__pseudomonadales	c__gammaproteobacteria	p__proteobacteria	d__bacteria	TRUE	TRUE	1.4e-09	TRUE	1	GATCACCTCCTTAAG	GACGCGTTGAGGGGGTATCTTTGA	-12.6732
GCF_004571175.1	s__legionella_d israelensis	g__legionella_d	f__legionellaceae	o__legionellales	c__gammaproteobacteria	p__proteobacteria	d__bacteria	TRUE	TRUE	3.1e-08	TRUE	1	GATCACCTCCTTAAA	AAAGCGTTAAGGGGGTATCTTTAA	-12.6667
GCF_011065405.1	s__succinivibrio dextrinosolvens_a	g__succinivibrio	f__succinivibrionaceae	o__enterobacterales	c__gammaproteobacteria	p__proteobacteria	d__bacteria	TRUE	TRUE	4.5e-05	TRUE	1	GATCACCTCCTTAAC	GATGCATTAAGGGGGTACCTTTGA	-12.6667
GCF_900044015.1	s__hoaglandella endobia	g__hoaglandella	f__enterobacteriaceae	o__enterobacterales	c__gammaproteobacteria	p__proteobacteria	d__bacteria	TRUE	TRUE	3.5e-10	TRUE	1	GATCACCTCCTTACC	ATAGTTCTGAGGAGGTATCTTTGA	-12.5202
GCF_000250635.1	s__saprospira grandis_b	g__saprospira	f__saprospiraceae	o__chitinophagales	c__bacteroidia	p__bacteroidota	d__bacteria	TRUE	TRUE	8e-06	TRUE	1	GAATACCTCCTTTAA	AGTCTTCTTAGGGGGTATCTTTGA	-11.9114
GCF_000196495.1	s__aliivibrio salmonicida_a	g__aliivibrio	f__vibrionaceae	o__enterobacterales	c__gammaproteobacteria	p__proteobacteria	d__bacteria	TRUE	TRUE	1.2e-08	TRUE	1	GATCACCTCCTTAAC	AATATCCTGAGGGGGTACCTTTGA	-11.746
GCF_013460135.1	s__arsenophonus sp000757905	g__arsenophonus	f__enterobacteriaceae	o__enterobacterales	c__gammaproteobacteria	p__proteobacteria	d__bacteria	TRUE	TRUE	6.3e-10	TRUE	1	GATCACCTCCTTACC	AAGATCTTGAGGGGGTATCTTTGA	-11.746
GCF_002237535.1	s__bacterioplanes sanyensis_a	g__bacterioplanes	f__dsm-6294	o__pseudomonadales	c__gammaproteobacteria	p__proteobacteria	d__bacteria	TRUE	TRUE	7e-09	TRUE	1	GATCACCTCCTTAAA	GACGTGCTGAGGGGGTATCTTTGA	-11.746
GCF_011455875.1	s__basfia succiniciproducens	g__basfia	f__pasteurellaceae	o__enterobacterales	c__gammaproteobacteria	p__proteobacteria	d__bacteria	TRUE	TRUE	9.5e-10	TRUE	1	GATCACCTCCTTACT	GACGTGCTGAGGGGGTATCTTTGA	-11.746
GCF_001720485.1	s__cobetia marina	g__cobetia	f__halomonadaceae	o__pseudomonadales	c__gammaproteobacteria	p__proteobacteria	d__bacteria	TRUE	TRUE	4.1e-10	TRUE	1	GATCACCTCCTTATC	GAAGTCCTGAGGGGGTATCTTTGA	-11.746
GCF_009796845.1	s__cobetia sp009796845	g__cobetia	f__halomonadaceae	o__pseudomonadales	c__gammaproteobacteria	p__proteobacteria	d__bacteria	TRUE	TRUE	4.1e-10	TRUE	1	GATCACCTCCTTATC	GAAGTCCTGAGGGGGTATCTTTGA	-11.746
GCF_900095885.1	s__dickeya aquatica	g__dickeya	f__enterobacteriaceae	o__enterobacterales	c__gammaproteobacteria	p__proteobacteria	d__bacteria	TRUE	TRUE	3.4e-10	TRUE	1	GATCACCTCCTTACC	GCCGTTCTGAGGGGGTATCTTTGA	-11.746
GCF_002812485.1	s__dickeya fangzhongdai	g__dickeya	f__enterobacteriaceae	o__enterobacterales	c__gammaproteobacteria	p__proteobacteria	d__bacteria	TRUE	TRUE	3.4e-10	TRUE	1	GATCACCTCCTTACC	GCTGTTCTGAGGGGGTATCTTTGA	-11.746
GCF_007858975.2	s__dickeya poaceiphila	g__dickeya	f__enterobacteriaceae	o__enterobacterales	c__gammaproteobacteria	p__proteobacteria	d__bacteria	TRUE	TRUE	2.9e-09	TRUE	1	GATCACCTCCTTACC	GCCGTTCTGAGGGGGTATCTTTGA	-11.746
GCF_001644705.1	s__dickeya solani	g__dickeya	f__enterobacteriaceae	o__enterobacterales	c__gammaproteobacteria	p__proteobacteria	d__bacteria	TRUE	TRUE	3.4e-10	TRUE	1	GATCACCTCCTTACC	GCTGTTCTGAGGGGGTATCTTTGA	-11.746
GCF_000264765.2	s__edwardsiella anguillarum	g__edwardsiella	f__enterobacteriaceae	o__enterobacterales	c__gammaproteobacteria	p__proteobacteria	d__bacteria	TRUE	TRUE	2.2e-08	TRUE	1	GATCACCTCCTTACC	GATGTTCTGAGGGGGTATCTTTGA	-11.746
GCF_000287355.1	s__gcf-000287355 sp000287355	g__gcf-000287355	f__enterobacteriaceae	o__enterobacterales	c__gammaproteobacteria	p__proteobacteria	d__bacteria	TRUE	TRUE	0.00019	TRUE	1	GATCACCTCCTTATT	AGTTTTTTGAGGGGGTACTTTTGA	-11.746
GCF_001586165.1	s__hafnia proteus	g__hafnia	f__enterobacteriaceae	o__enterobacterales	c__gammaproteobacteria	p__proteobacteria	d__bacteria	TRUE	TRUE	7.2e-09	TRUE	1	GATCACCTCCTTACC	GAAGTTCTGAGGGGGTATCTTTGA	-11.746
GCF_017868935.1	s__halomonas sp017868935	g__halomonas	f__halomonadaceae	o__pseudomonadales	c__gammaproteobacteria	p__proteobacteria	d__bacteria	TRUE	TRUE	2e-08	TRUE	1	GATCACCTCCTTAAA	GACGTCCTGAGGGGGTATCTTTGA	-11.746
GCF_001886615.1	s__halomonas aestuarii	g__halomonas	f__halomonadaceae	o__pseudomonadales	c__gammaproteobacteria	p__proteobacteria	d__bacteria	TRUE	TRUE	8e-08	TRUE	1	GATCACCTCCTTAAA	GACGTCCTGAGGGGGTATCTTTGA	-11.746
GCF_014931605.1	s__halomonas sp014931605	g__halomonas	f__halomonadaceae	o__pseudomonadales	c__gammaproteobacteria	p__proteobacteria	d__bacteria	TRUE	TRUE	2e-08	TRUE	1	GATCACCTCCTTAAA	GATGTCCTGAGGGGGTATCTTTGA	-11.746
GCF_001545155.1	s__halomonas chromatireducens	g__halomonas	f__halomonadaceae	o__pseudomonadales	c__gammaproteobacteria	p__proteobacteria	d__bacteria	TRUE	TRUE	2e-08	TRUE	1	GATCACCTCCTTAAA	GATGTCCTGAGGGGGTATCTTTGA	-11.746
GCF_015992245.1	s__halomonas sp015992245	g__halomonas	f__halomonadaceae	o__pseudomonadales	c__gammaproteobacteria	p__proteobacteria	d__bacteria	TRUE	TRUE	2.3e-08	TRUE	1	GATCACCTCCTTAAA	GACGTCCTGAGGGGGTATCTTTGA	-11.746
GCF_008329985.2	s__halomonas sp008329985	g__halomonas	f__halomonadaceae	o__pseudomonadales	c__gammaproteobacteria	p__proteobacteria	d__bacteria	TRUE	TRUE	2e-08	TRUE	1	GATCACCTCCTTAAT	GATGTCCTGAGGGGGTATCTTTGA	-11.746
GCF_001431725.1	s__halomonas huangheensis	g__halomonas	f__halomonadaceae	o__pseudomonadales	c__gammaproteobacteria	p__proteobacteria	d__bacteria	TRUE	TRUE	2e-08	TRUE	1	GATCACCTCCTTAAT	GACGTCCTGAGGGGGTATCTTTGA	-11.746
GCF_009363755.1	s__halomonas sp009363755	g__halomonas	f__halomonadaceae	o__pseudomonadales	c__gammaproteobacteria	p__proteobacteria	d__bacteria	TRUE	TRUE	9.8e-07	TRUE	1	GATCACCTCCTTAAT	GACGTCCTGAGGGGGTATCTTTGA	-11.746
GCF_002549795.1	s__halomonas beimenensis	g__halomonas	f__halomonadaceae	o__pseudomonadales	c__gammaproteobacteria	p__proteobacteria	d__bacteria	TRUE	TRUE	5.9e-08	TRUE	1	GATCACCTCCTTAAT	GATGTCCTGAGGGGGTATCTTTGA	-11.746
GCF_000196875.2	s__halomonas elongata	g__halomonas	f__halomonadaceae	o__pseudomonadales	c__gammaproteobacteria	p__proteobacteria	d__bacteria	TRUE	TRUE	2.9e-08	TRUE	1	GATCACCTCCTTAAT	GATGTCCTGAGGGGGTATCTTTGA	-11.746
GCF_010977575.1	s__halomonas_b socia	g__halomonas_b	f__halomonadaceae	o__pseudomonadales	c__gammaproteobacteria	p__proteobacteria	d__bacteria	TRUE	TRUE	2e-08	TRUE	1	GATCACCTCCTTACC	GACGTCCTGAGGGGGTATCTTTGA	-11.746
GCF_001971685.1	s__halomonas_b sp001971685	g__halomonas_b	f__halomonadaceae	o__pseudomonadales	c__gammaproteobacteria	p__proteobacteria	d__bacteria	TRUE	TRUE	5.8e-09	TRUE	1	GATCACCTCCTTATC	GACGTCCTGAGGGGGTATCTTTGA	-11.746
GCF_014840935.1	s__halomonas_e sp014840935	g__halomonas_e	f__halomonadaceae	o__pseudomonadales	c__gammaproteobacteria	p__proteobacteria	d__bacteria	TRUE	TRUE	6.2e-08	TRUE	1	GATCACCTCCTTAAT	GACGTCCTGAGGGGGTATCTTTGA	-11.746
GCF_001648175.1	s__halotalea alkalilenta_a	g__halotalea	f__halomonadaceae	o__pseudomonadales	c__gammaproteobacteria	p__proteobacteria	d__bacteria	TRUE	TRUE	1.1e-09	TRUE	1	GATCACCTCCTTAAA	GACGTCCTGAGGGGGTATCTTTGA	-11.746
GCF_004851605.1	s__hydrocarboniclastica marina	g__hydrocarboniclastica	f__oleiphilaceae	o__pseudomonadales	c__gammaproteobacteria	p__proteobacteria	d__bacteria	TRUE	TRUE	2e-09	TRUE	1	GATCACCTCCTTAAA	GACGCTCTGAGGGGGTATCTTTGA	-11.746
GCF_010669285.1	s__kineobactrum salinum	g__kineobactrum	f__halieaceae	o__pseudomonadales	c__gammaproteobacteria	p__proteobacteria	d__bacteria	TRUE	TRUE	5.4e-07	TRUE	1	GATCACCTCCTTAAA	GACGTACTGAGGGGGTACCTTTGA	-11.746
GCF_002155145.1	s__kushneria konosiri	g__kushneria	f__halomonadaceae	o__pseudomonadales	c__gammaproteobacteria	p__proteobacteria	d__bacteria	TRUE	TRUE	3.3e-06	TRUE	1	GATCACCTCCTTAAA	GACGTCCTGAGGGGGTATCTTTGA	-11.746
GCF_002157205.1	s__kushneria marisflavi	g__kushneria	f__halomonadaceae	o__pseudomonadales	c__gammaproteobacteria	p__proteobacteria	d__bacteria	TRUE	TRUE	3.3e-06	TRUE	1	GATCACCTCCTTAAA	GACGTCCTGAGGGGGTATCTTTGA	-11.746
GCF_008247605.1	s__kushneria phosphatilytica	g__kushneria	f__halomonadaceae	o__pseudomonadales	c__gammaproteobacteria	p__proteobacteria	d__bacteria	TRUE	TRUE	5e-10	TRUE	1	GATCACCTCCTTAAA	GAAGTCCTGAGGGGGTATCTTTGA	-11.746
GCF_900478135.1	s__leminorella richardii	g__leminorella	f__enterobacteriaceae	o__enterobacterales	c__gammaproteobacteria	p__proteobacteria	d__bacteria	TRUE	TRUE	3.6e-10	TRUE	1	GATCACCTCCTTACC	GCCGTTCTGAGGGGGTATCTTTGA	-11.746
GCF_015999465.1	s__lonsdalea populi	g__lonsdalea	f__enterobacteriaceae	o__enterobacterales	c__gammaproteobacteria	p__proteobacteria	d__bacteria	TRUE	TRUE	3.7e-09	TRUE	1	GATCACCTCCTTACC	GTGGTTCTGAGGGGGTATCTTTGA	-11.746
GCF_001447155.2	s__marinobacter sp001447155	g__marinobacter	f__oleiphilaceae	o__pseudomonadales	c__gammaproteobacteria	p__proteobacteria	d__bacteria	TRUE	TRUE	1.8e-10	TRUE	1	GATCACCTCCTTAAA	GAAGCGCTGAGGGGGTATCTTTGA	-11.746
GCF_004353225.1	s__marinobacter sp004353225	g__marinobacter	f__oleiphilaceae	o__pseudomonadales	c__gammaproteobacteria	p__proteobacteria	d__bacteria	TRUE	TRUE	1.8e-10	TRUE	1	GATCACCTCCTTAAA	GAAGCGCTGAGGGGGTATCTTTGA	-11.746
GCF_000284615.1	s__marinobacter hydrocarbonoclasticus	g__marinobacter	f__oleiphilaceae	o__pseudomonadales	c__gammaproteobacteria	p__proteobacteria	d__bacteria	TRUE	TRUE	1.8e-10	TRUE	1	GATCACCTCCTTAAA	GAAGCGCTGAGGGGGTATCTTTGA	-11.746
GCF_900187275.1	s__pasteurella multocida	g__pasteurella	f__pasteurellaceae	o__enterobacterales	c__gammaproteobacteria	p__proteobacteria	d__bacteria	TRUE	TRUE	1.6e-10	TRUE	1	GATCACCTCCTTACC	CAAGTGTTGAGGGGGTATCTTTGA	-11.746
GCF_001010285.1	s__photorhabdus thracensis	g__photorhabdus	f__enterobacteriaceae	o__enterobacterales	c__gammaproteobacteria	p__proteobacteria	d__bacteria	TRUE	TRUE	1.1e-09	TRUE	1	GATCACCTCCTTACC	ACGGTTCTGAGGGGGTATCTTTGA	-11.746
GCF_003343245.1	s__photorhabdus laumondii	g__photorhabdus	f__enterobacteriaceae	o__enterobacterales	c__gammaproteobacteria	p__proteobacteria	d__bacteria	TRUE	TRUE	1.1e-09	TRUE	1	GATCACCTCCTTACC	ACGGTTCTGAGGGGGTATCTTTGA	-11.746
GCF_007954585.1	s__pistricoccus aurantiacus	g__pistricoccus	f__halomonadaceae	o__pseudomonadales	c__gammaproteobacteria	p__proteobacteria	d__bacteria	TRUE	TRUE	8.5e-10	TRUE	1	GATCACCTCCTTAAC	GACGTCCTGAGGGGGTACCTTTGA	-11.746
GCF_002843235.3	s__providencia huaxiensis	g__providencia	f__enterobacteriaceae	o__enterobacterales	c__gammaproteobacteria	p__proteobacteria	d__bacteria	TRUE	TRUE	3.3e-09	TRUE	1	GATCACCTCCTTACC	GTGGTTCTGAGGGGGTATCTTTGA	-11.746
GCF_013255915.1	s__providencia rettgeri_d	g__providencia	f__enterobacteriaceae	o__enterobacterales	c__gammaproteobacteria	p__proteobacteria	d__bacteria	TRUE	TRUE	2.9e-09	TRUE	1	GATCACCTCCTTACC	GTGGTTCTGAGGGGGTATCTTTGA	-11.746
GCF_013702265.1	s__providencia rettgeri_f	g__providencia	f__enterobacteriaceae	o__enterobacterales	c__gammaproteobacteria	p__proteobacteria	d__bacteria	TRUE	TRUE	1.3e-09	TRUE	1	GATCACCTCCTTACC	ACGGTTCTGAGGGGGTATCTTTGA	-11.746
GCF_001874625.1	s__providencia rettgeri_a	g__providencia	f__enterobacteriaceae	o__enterobacterales	c__gammaproteobacteria	p__proteobacteria	d__bacteria	TRUE	TRUE	6.5e-10	TRUE	1	GATCACCTCCTTACC	GAGGTTCTGAGGGGGTATCTTTGA	-11.746
GCF_001444425.1	s__pseudohongiella spirulinae	g__pseudohongiella	f__pseudohongiellaceae	o__pseudomonadales	c__gammaproteobacteria	p__proteobacteria	d__bacteria	TRUE	TRUE	1e-08	TRUE	1	GATCACCTCCTTAAA	AACACGCTGAGGGGGTACCTTTGA	-11.746
GCF_003006155.1	s__salinicola tamaricis	g__salinicola	f__halomonadaceae	o__pseudomonadales	c__gammaproteobacteria	p__proteobacteria	d__bacteria	TRUE	TRUE	3.3e-10	TRUE	1	GATCACCTCCTTAAA	GACGTCCTGAGGGGGTATCTTTGA	-11.746
GCF_017354945.1	s__shewanella sp017354945	g__shewanella	f__shewanellaceae	o__enterobacterales	c__gammaproteobacteria	p__proteobacteria	d__bacteria	TRUE	TRUE	1.7e-10	TRUE	1	GATCACCTCCTTACC	GAACTCCTGAGGGGGTATCTTTGA	-11.746
GCF_000305785.2	s__simiduia agarivorans	g__simiduia	f__cellvibrionaceae	o__pseudomonadales	c__gammaproteobacteria	p__proteobacteria	d__bacteria	TRUE	TRUE	3.7e-08	TRUE	1	GATCACCTCCTTAAA	GACGTGCTGAGGGGGTATCTTTGA	-11.746
GCA_000010085.1	s__sodalis glossinidius	g__sodalis	f__enterobacteriaceae	o__enterobacterales	c__gammaproteobacteria	p__proteobacteria	d__bacteria	TRUE	TRUE	3.4e-10	TRUE	1	GATCACCTCCTTACC	GCCGTTCTGAGGGGGTATCTTTGA	-11.746
GCF_011009015.1	s__spartinivicinus ruber	g__spartinivicinus	f__zooshikellaceae	o__pseudomonadales	c__gammaproteobacteria	p__proteobacteria	d__bacteria	TRUE	TRUE	4.2e-08	TRUE	1	GATCACCTCCTTAAA	GAGGTGCTGAGGGGGTACCTTTGA	-11.746
GCF_000023065.1	s__tolumonas auensis	g__tolumonas	f__aeromonadaceae	o__enterobacterales	c__gammaproteobacteria	p__proteobacteria	d__bacteria	TRUE	TRUE	1.1e-09	TRUE	1	GATCACCTCCTTACC	GAACTCCTGAGGGGGTACCTTTGA	-11.746
GCA_016132445.1	s__uba2009 sp016132445	g__uba2009	f__dsm-6294	o__pseudomonadales	c__gammaproteobacteria	p__proteobacteria	d__bacteria	TRUE	TRUE	2.2e-09	TRUE	1	GATCACCTCCTTAAA	GACGTGCTGAGGGGGTATCTTTGA	-11.746
GCF_001547935.1	s__vibrio tritonius	g__vibrio	f__vibrionaceae	o__enterobacterales	c__gammaproteobacteria	p__proteobacteria	d__bacteria	TRUE	TRUE	2.8e-07	TRUE	1	GATCACCTCCTTAAT	AATATCCTGAGGGGGTATCTTTGA	-11.746
GCF_019048845.1	s__vibrio sp000176715	g__vibrio	f__vibrionaceae	o__enterobacterales	c__gammaproteobacteria	p__proteobacteria	d__bacteria	TRUE	TRUE	1.2e-08	TRUE	1	GATCACCTCCTTACA	AATATCCTGAGGGGGTATCTTTGA	-11.746
GCF_009665255.1	s__vibrio metoecus_b	g__vibrio	f__vibrionaceae	o__enterobacterales	c__gammaproteobacteria	p__proteobacteria	d__bacteria	TRUE	TRUE	1.2e-08	TRUE	1	GATCACCTCCTTACA	AATATCCTGAGGGGGTATCTTTGA	-11.746
GCF_011306175.1	s__vibrio sp011306175	g__vibrio	f__vibrionaceae	o__enterobacterales	c__gammaproteobacteria	p__proteobacteria	d__bacteria	TRUE	TRUE	1.2e-08	TRUE	1	GATCACCTCCTTACA	AATATCCTGAGGGGGTATCTTTGA	-11.746
GCF_011064285.1	s__vibrio ziniensis	g__vibrio	f__vibrionaceae	o__enterobacterales	c__gammaproteobacteria	p__proteobacteria	d__bacteria	TRUE	TRUE	8.4e-09	TRUE	1	GATCACCTCCTTACG	AATATCCTGAGGGGGTACCTTTGA	-11.746
GCF_002196515.1	s__vibrio gazogenes_a	g__vibrio	f__vibrionaceae	o__enterobacterales	c__gammaproteobacteria	p__proteobacteria	d__bacteria	TRUE	TRUE	2.2e-09	TRUE	1	GATCACCTCCTTACG	AATGTCCTGAGGGGGTATCTTTGA	-11.746
GCF_009601765.2	s__vibrio sp009601765	g__vibrio	f__vibrionaceae	o__enterobacterales	c__gammaproteobacteria	p__proteobacteria	d__bacteria	TRUE	TRUE	2.3e-08	TRUE	1	GATCACCTCCTTACG	CACGTTTTGAGGGGGTACCTTTGA	-11.746
GCF_002218025.2	s__vibrio casei	g__vibrio	f__vibrionaceae	o__enterobacterales	c__gammaproteobacteria	p__proteobacteria	d__bacteria	TRUE	TRUE	2.5e-09	TRUE	1	GATCACCTCCTTACG	AATGTTCTGAGGGGGTATCTTTGA	-11.746
GCF_001677275.1	s__vibrio breoganii	g__vibrio	f__vibrionaceae	o__enterobacterales	c__gammaproteobacteria	p__proteobacteria	d__bacteria	TRUE	TRUE	2.2e-09	TRUE	1	GATCACCTCCTTATA	AATGTCCTGAGGGGGTACCTTTGA	-11.746
GCF_009938225.1	s__vibrio ponticus	g__vibrio	f__vibrionaceae	o__enterobacterales	c__gammaproteobacteria	p__proteobacteria	d__bacteria	TRUE	TRUE	2.4e-08	TRUE	1	GATCACCTCCTTATA	ACAATCCTGAGGGGGTATCTTTGA	-11.746
GCF_019226825.1	s__vibrio sp004804295	g__vibrio	f__vibrionaceae	o__enterobacterales	c__gammaproteobacteria	p__proteobacteria	d__bacteria	TRUE	TRUE	2.7e-09	TRUE	1	GATCACCTCCTTATA	AATGTCCTGAGGGGGTATCTTTGA	-11.746
GCF_005144905.1	s__vibrio cyclitrophicus	g__vibrio	f__vibrionaceae	o__enterobacterales	c__gammaproteobacteria	p__proteobacteria	d__bacteria	TRUE	TRUE	1.2e-08	TRUE	1	GATCACCTCCTTATA	AATATCCTGAGGGGGTATCTTTGA	-11.746
GCF_002157735.2	s__vibrio aphrogenes	g__vibrio	f__vibrionaceae	o__enterobacterales	c__gammaproteobacteria	p__proteobacteria	d__bacteria	TRUE	TRUE	2.5e-09	TRUE	1	GATCACCTCCTTATA	AATGTTCTGAGGGGGTATCTTTGA	-11.746
GCF_009363415.1	s__vibrio aquimaris	g__vibrio	f__vibrionaceae	o__enterobacterales	c__gammaproteobacteria	p__proteobacteria	d__bacteria	TRUE	TRUE	9.3e-10	TRUE	1	GATCACCTCCTTATA	AGTGTCCTGAGGGGGTATCTTTGA	-11.746
GCF_002906655.1	s__vibrio hyugaensis	g__vibrio	f__vibrionaceae	o__enterobacterales	c__gammaproteobacteria	p__proteobacteria	d__bacteria	TRUE	TRUE	2.2e-09	TRUE	1	GATCACCTCCTTATA	AATGTCCTGAGGGGGTATCTTTGA	-11.746
GCF_905175385.1	s__vibrio sp903986855	g__vibrio	f__vibrionaceae	o__enterobacterales	c__gammaproteobacteria	p__proteobacteria	d__bacteria	TRUE	TRUE	2.2e-09	TRUE	1	GATCACCTCCTTATA	AATGTCCTGAGGGGGTATCTTTGA	-11.746
GCF_014879975.1	s__vibrio bathopelagicus	g__vibrio	f__vibrionaceae	o__enterobacterales	c__gammaproteobacteria	p__proteobacteria	d__bacteria	TRUE	TRUE	1.2e-08	TRUE	1	GATCACCTCCTTATA	AATATCCTGAGGGGGTATCTTTGA	-11.746
GCF_002224265.1	s__vibrio vulnificus	g__vibrio	f__vibrionaceae	o__enterobacterales	c__gammaproteobacteria	p__proteobacteria	d__bacteria	TRUE	TRUE	2.2e-09	TRUE	1	GATCACCTCCTTATA	AATGTCCTGAGGGGGTATCTTTGA	-11.746
GCF_900233005.1	s__vibrio tapetis	g__vibrio	f__vibrionaceae	o__enterobacterales	c__gammaproteobacteria	p__proteobacteria	d__bacteria	TRUE	TRUE	1.2e-08	TRUE	1	GATCACCTCCTTATA	AATATCCTGAGGGGGTACCTTTGA	-11.746
GCF_002218045.2	s__vibrio rumoiensis	g__vibrio	f__vibrionaceae	o__enterobacterales	c__gammaproteobacteria	p__proteobacteria	d__bacteria	TRUE	TRUE	2.5e-09	TRUE	1	GATCACCTCCTTATA	AATGTTCTGAGGGGGTATCTTTGA	-11.746
GCF_000772105.1	s__vibrio tubiashii	g__vibrio	f__vibrionaceae	o__enterobacterales	c__gammaproteobacteria	p__proteobacteria	d__bacteria	TRUE	TRUE	9.8e-10	TRUE	1	GATCACCTCCTTATA	AATGTCCTGAGGGGGTACCTTTGA	-11.746
GCF_000968175.1	s__xenorhabdus poinarii	g__xenorhabdus	f__enterobacteriaceae	o__enterobacterales	c__gammaproteobacteria	p__proteobacteria	d__bacteria	TRUE	TRUE	9e-10	TRUE	1	GATCACCTCCTTAAA	GCAGTTCTGAGGGGGTATCTTTGA	-11.746
GCF_000027225.1	s__xenorhabdus bovienii_c	g__xenorhabdus	f__enterobacteriaceae	o__enterobacterales	c__gammaproteobacteria	p__proteobacteria	d__bacteria	TRUE	TRUE	3.2e-09	TRUE	1	GATCACCTCCTTACC	GACGTTCTGAGGGGGTATCTTTGA	-11.746
GCF_000973125.1	s__xenorhabdus bovienii	g__xenorhabdus	f__enterobacteriaceae	o__enterobacterales	c__gammaproteobacteria	p__proteobacteria	d__bacteria	TRUE	TRUE	5.5e-10	TRUE	1	GATCACCTCCTTACC	GAAGTTCTGAGGGGGTATCTTTGA	-11.746
GCF_003610015.1	s__zymobacter palmae	g__zymobacter	f__halomonadaceae	o__pseudomonadales	c__gammaproteobacteria	p__proteobacteria	d__bacteria	TRUE	TRUE	1.2e-08	TRUE	1	GATCACCTCCTTAAA	GACGTCCTGAGGGGGTATCTTTGA	-11.746
GCF_002688585.1	s__fonsibacter ubiquis	g__fonsibacter	f__pelagibacteraceae	o__pelagibacterales	c__alphaproteobacteria	p__proteobacteria	d__bacteria	TRUE	TRUE	0.0015	TRUE	1	GATTACCTCCTTTCT	GATAACATAAGGGGGTATCTTTGA	-11.7396
GCF_900048045.1	s__mikella endobia	g__mikella	f__enterobacteriaceae	o__enterobacterales	c__gammaproteobacteria	p__proteobacteria	d__bacteria	TRUE	TRUE	1.3e-07	TRUE	1	GATCACCTCCTTAAA	GAAATTCTAAGGGGGTATCTTTAA	-11.7396
GCF_900090215.1	s__mikella sp900090215	g__mikella	f__enterobacteriaceae	o__enterobacterales	c__gammaproteobacteria	p__proteobacteria	d__bacteria	TRUE	TRUE	5.4e-07	TRUE	1	GATCACCTCCTTAAC	ACCTTTATAAGGGGGTATCTTTAA	-11.7396
GCF_006741185.1	s__buchnera aphidicola_t	g__buchnera	f__enterobacteriaceae_a	o__enterobacterales_a	c__gammaproteobacteria	p__proteobacteria	d__bacteria	TRUE	TRUE	0.034	TRUE	1	GATCACCTCCTTAAA	AATAGCTTAAGGAGGAATCTTTAA	-11.6538
GCF_000730245.1	s__jidaibacter sp000730245	g__jidaibacter	f__midichloriaceae	o__rickettsiales	c__alphaproteobacteria	p__proteobacteria	d__bacteria	TRUE	TRUE	0.0041	TRUE	1	GATTACCTCCTTTCA	TCGCTTCTTAGGAGGTATCTTTGA	-11.5866
GCF_014075995.1	s__adhaeribacter radiodurans	g__adhaeribacter	f__hymenobacteraceae	o__cytophagales	c__bacteroidia	p__bacteroidota	d__bacteria	TRUE	TRUE	5.9e-07	TRUE	1	GATCACCTCCTTTCT	GAGGCTTTGAGGAGGTATCTTTGA	-11.5161
GCF_014217805.1	s__adhaeribacter swui	g__adhaeribacter	f__hymenobacteraceae	o__cytophagales	c__bacteroidia	p__bacteroidota	d__bacteria	TRUE	TRUE	5.8e-07	TRUE	1	GATCACCTCCTTTCT	GATGCCTTGAGGAGGTATCTTTGA	-11.5161
GCF_001593605.1	s__algoriphagus sanaruensis	g__algoriphagus	f__cyclobacteriaceae	o__cytophagales	c__bacteroidia	p__bacteroidota	d__bacteria	TRUE	TRUE	9.6e-06	TRUE	1	GAACACCTCCTTTCT	TCGGCTTTGAGGAGGTATCTTTGA	-11.5161
GCF_014838715.1	s__algoriphagus sp014838715	g__algoriphagus	f__cyclobacteriaceae	o__cytophagales	c__bacteroidia	p__bacteroidota	d__bacteria	TRUE	TRUE	5.1e-05	TRUE	1	GAACACCTCCTTTCT	TCGGCTTTGAGGAGGTATCTTTGA	-11.5161
GCF_001659705.1	s__arachidicoccus sp001659705	g__arachidicoccus	f__chitinophagaceae	o__chitinophagales	c__bacteroidia	p__bacteroidota	d__bacteria	TRUE	TRUE	0.0033	TRUE	1	GAATACCTCCTTTTT	CTTGTCCTGAGGAGGTTTCTTTGA	-11.5161
GCF_003600625.1	s__arachidicoccus soli	g__arachidicoccus	f__chitinophagaceae	o__chitinophagales	c__bacteroidia	p__bacteroidota	d__bacteria	TRUE	TRUE	0.0084	TRUE	1	GAATACCTCCTTTTT	TTGGTCTTGAGGAGGTTTCTTTGA	-11.5161
GCF_007971385.1	s__arachidicoccus ginsenosidivorans	g__arachidicoccus	f__chitinophagaceae	o__chitinophagales	c__bacteroidia	p__bacteroidota	d__bacteria	TRUE	TRUE	0.0016	TRUE	1	GAATACCTCCTTTTT	TTGGTTTTGAGGAGGTTTCTTTGA	-11.5161
GCF_012113595.1	s__bacteroides sp012113595	g__bacteroides	f__bacteroidaceae	o__bacteroidales	c__bacteroidia	p__bacteroidota	d__bacteria	TRUE	TRUE	0.00012	TRUE	1	GAACACCTCCTTTCT	GATGCGCTGAGGAGGTATCTTTGA	-11.5161
GCF_002222615.2	s__bacteroides caccae	g__bacteroides	f__bacteroidaceae	o__bacteroidales	c__bacteroidia	p__bacteroidota	d__bacteria	TRUE	TRUE	0.00012	TRUE	1	GAACACCTCCTTTCT	GATGCGCTGAGGAGGTATCTTTGA	-11.5161
GCF_002849695.1	s__bacteroides fragilis_a	g__bacteroides	f__bacteroidaceae	o__bacteroidales	c__bacteroidia	p__bacteroidota	d__bacteria	TRUE	TRUE	0.00011	TRUE	1	GAACACCTCCTTTCT	GATGCGCTGAGGAGGTATCTTTGA	-11.5161
GCF_001314995.1	s__bacteroides ovatus	g__bacteroides	f__bacteroidaceae	o__bacteroidales	c__bacteroidia	p__bacteroidota	d__bacteria	TRUE	TRUE	0.00012	TRUE	1	GAACACCTCCTTTCT	GATGCGCTGAGGAGGTATCTTTGA	-11.5161
GCF_009193325.2	s__bacteroides zhangwenhongi	g__bacteroides	f__bacteroidaceae	o__bacteroidales	c__bacteroidia	p__bacteroidota	d__bacteria	TRUE	TRUE	0.00012	TRUE	1	GAACACCTCCTTTCT	GATGCGCTGAGGAGGTATCTTTGA	-11.5161
GCF_001688725.2	s__bacteroides caecimuris	g__bacteroides	f__bacteroidaceae	o__bacteroidales	c__bacteroidia	p__bacteroidota	d__bacteria	TRUE	TRUE	0.00012	TRUE	1	GAACACCTCCTTTCT	GATGCGCTGAGGAGGTATCTTTGA	-11.5161
GCF_000011065.1	s__bacteroides thetaiotaomicron	g__bacteroides	f__bacteroidaceae	o__bacteroidales	c__bacteroidia	p__bacteroidota	d__bacteria	TRUE	TRUE	0.00012	TRUE	1	GAACACCTCCTTTCT	GATGCGCTGAGGAGGTATCTTTGA	-11.5161
GCF_009193295.2	s__bacteroides luhongzhouii	g__bacteroides	f__bacteroidaceae	o__bacteroidales	c__bacteroidia	p__bacteroidota	d__bacteria	TRUE	TRUE	0.00012	TRUE	1	GAACACCTCCTTTCT	GATGCGCTGAGGAGGTATCTTTGA	-11.5161
GCF_000512915.1	s__barnesiella viscericola	g__barnesiella	f__barnesiellaceae	o__bacteroidales	c__bacteroidia	p__bacteroidota	d__bacteria	TRUE	TRUE	0.0017	TRUE	1	GAACACCTCCTTTCT	TTGGCGTTGAGGAGGTATCTTTGA	-11.5161
GCF_000265405.1	s__belliella baltica	g__belliella	f__cyclobacteriaceae	o__cytophagales	c__bacteroidia	p__bacteroidota	d__bacteria	TRUE	TRUE	1.2e-05	TRUE	1	GAACACCTCCTTTCT	TCGGCTTTGAGGAGGTATCTTTGA	-11.5161
GCF_001402875.1	s__blastochloris viridis	g__blastochloris	f__xanthobacteraceae	o__rhizobiales	c__alphaproteobacteria	p__proteobacteria	d__bacteria	TRUE	TRUE	8.3e-07	TRUE	1	GATCACCTCCTTTCT	GGACTGCTGAGGAGGTCTCTTTGA	-11.5161
GCF_003966715.1	s__blastochloris tepida	g__blastochloris	f__xanthobacteraceae	o__rhizobiales	c__alphaproteobacteria	p__proteobacteria	d__bacteria	TRUE	TRUE	8.3e-07	TRUE	1	GATCACCTCCTTTCT	GGACTGCTGAGGAGGTCTCTTTGA	-11.5161
GCF_003991565.1	s__butyricimonas faecalis	g__butyricimonas	f__marinifilaceae	o__bacteroidales	c__bacteroidia	p__bacteroidota	d__bacteria	TRUE	TRUE	0.00025	TRUE	1	GAACACCTCCTTTCT	GAAGCATTGAGGAGGTATCTTTGA	-11.5161
GCF_009797025.1	s__cellulophaga sp009797025	g__cellulophaga	f__flavobacteriaceae	o__flavobacteriales	c__bacteroidia	p__bacteroidota	d__bacteria	TRUE	TRUE	0.019	TRUE	1	GAACACCTCCTTTCT	GGTGCGTTGAGGAGGTATCTTTGA	-11.5161
GCF_000186265.1	s__cellulophaga algicola	g__cellulophaga	f__flavobacteriaceae	o__flavobacteriales	c__bacteroidia	p__bacteroidota	d__bacteria	TRUE	TRUE	0.019	TRUE	1	GAACACCTCCTTTCT	GGTGCGTTGAGGAGGTATCTTTGA	-11.5161
GCF_003589925.1	s__chryseolinea soli	g__chryseolinea	f__cyclobacteriaceae	o__cytophagales	c__bacteroidia	p__bacteroidota	d__bacteria	TRUE	TRUE	0.0013	TRUE	1	GAACACCTCCTTTCT	AGCGCCTTGAGGAGGTATCTTTGA	-11.5161
GCF_001050135.1	s__cyclobacterium amurskyense	g__cyclobacterium	f__cyclobacteriaceae	o__cytophagales	c__bacteroidia	p__bacteroidota	d__bacteria	TRUE	TRUE	0.00014	TRUE	1	GAACACCTCCTTTCT	ACGGCCTTGAGGAGGTATCTTTGA	-11.5161
GCF_000222485.1	s__cyclobacterium marinum	g__cyclobacterium	f__cyclobacteriaceae	o__cytophagales	c__bacteroidia	p__bacteroidota	d__bacteria	TRUE	TRUE	0.00011	TRUE	1	GAACACCTCCTTTCT	ACGGCCTTGAGGAGGTATCTTTGA	-11.5161
GCF_003353065.1	s__cyclonatronum proteinivorum	g__cyclonatronum	f__pxai01	o__balneolales	c__rhodothermia	p__bacteroidota	d__bacteria	TRUE	TRUE	0.0017	TRUE	1	GATCACCTCCTTTTT	GACGAACTGAGGAGGTATCTTTGA	-11.5161
GCF_015533855.1	s__echinicola sp015533855	g__echinicola	f__cyclobacteriaceae	o__cytophagales	c__bacteroidia	p__bacteroidota	d__bacteria	TRUE	TRUE	3.2e-06	TRUE	1	GAACACCTCCTTTCT	ACGGCCTTGAGGAGGTATCTTTGA	-11.5161
GCF_007197755.1	s__ferrovibrio terrae	g__ferrovibrio	f__ferrovibrionaceae	o__ferrovibrionales	c__alphaproteobacteria	p__proteobacteria	d__bacteria	TRUE	TRUE	1.2e-05	TRUE	1	GATCACCTCCTTTCT	GGGCTGCTGAGGAGGTCTCTTTGA	-11.5161
GCF_002355595.1	s__filimonas lacunae	g__filimonas	f__chitinophagaceae	o__chitinophagales	c__bacteroidia	p__bacteroidota	d__bacteria	TRUE	TRUE	0.003	TRUE	1	GAATACCTCCTTTTT	AGTGTCCTGAGGAGGTTTCTTTGA	-11.5161
GCF_007970805.1	s__flavisolibacter ginsenosidimutans	g__flavisolibacter	f__chitinophagaceae	o__chitinophagales	c__bacteroidia	p__bacteroidota	d__bacteria	TRUE	TRUE	0.003	TRUE	1	GAATACCTCCTTTTT	CTCGTCCTGAGGAGGTTTCTTTGA	-11.5161
GCF_001644645.1	s__flavisolibacter_b tropicus	g__flavisolibacter_b	f__chitinophagaceae	o__chitinophagales	c__bacteroidia	p__bacteroidota	d__bacteria	TRUE	TRUE	0.011	TRUE	1	GAATACCTCCTTTTT	GTTGTCCTGAGGAGGTTTCTTTGA	-11.5161
GCF_003076475.1	s__flavobacterium kingsejongi	g__flavobacterium	f__flavobacteriaceae	o__flavobacteriales	c__bacteroidia	p__bacteroidota	d__bacteria	TRUE	TRUE	0.0003	TRUE	1	GAACACCTCCTTTCT	GGTGCGTTGAGGAGGTATCTTTGA	-11.5161
GCF_003055625.1	s__flavobacterium magnum	g__flavobacterium	f__flavobacteriaceae	o__flavobacteriales	c__bacteroidia	p__bacteroidota	d__bacteria	TRUE	TRUE	0.0021	TRUE	1	GAACACCTCCTTTCT	GGTGCGTTGAGGAGGTACCTTTGA	-11.5161
GCF_003668995.1	s__flavobacterium sp003668995	g__flavobacterium	f__flavobacteriaceae	o__flavobacteriales	c__bacteroidia	p__bacteroidota	d__bacteria	TRUE	TRUE	0.0018	TRUE	1	GAACACCTCCTTTCT	GGTGCGTTGAGGAGGTATCTTTGA	-11.5161
GCF_001831475.1	s__flavobacterium crassostreae	g__flavobacterium	f__flavobacteriaceae	o__flavobacteriales	c__bacteroidia	p__bacteroidota	d__bacteria	TRUE	TRUE	0.0018	TRUE	1	GAACACCTCCTTTCT	GGTGCGTTGAGGAGGTATCTTTGA	-11.5161
GCF_013284035.1	s__flavobacterium sp003096795	g__flavobacterium	f__flavobacteriaceae	o__flavobacteriales	c__bacteroidia	p__bacteroidota	d__bacteria	TRUE	TRUE	0.0018	TRUE	1	GAACACCTCCTTTCT	GGTGCGTTGAGGAGGTATCTTTGA	-11.5161
GCF_003344925.1	s__flavobacterium arcticum	g__flavobacterium	f__flavobacteriaceae	o__flavobacteriales	c__bacteroidia	p__bacteroidota	d__bacteria	TRUE	TRUE	0.0025	TRUE	1	GAACACCTCCTTTCT	GGTGCGCTGAGGAGGTATCTTTGA	-11.5161
GCF_001857965.1	s__flavobacterium commune	g__flavobacterium	f__flavobacteriaceae	o__flavobacteriales	c__bacteroidia	p__bacteroidota	d__bacteria	TRUE	TRUE	0.001	TRUE	1	GAACACCTCCTTTCT	GGTGCGTTGAGGAGGTATCTTTGA	-11.5161
GCF_014844035.1	s__flavobacterium sp014844035	g__flavobacterium	f__flavobacteriaceae	o__flavobacteriales	c__bacteroidia	p__bacteroidota	d__bacteria	TRUE	TRUE	0.0018	TRUE	1	GAACACCTCCTTTCT	GGTGCGTTGAGGAGGTATCTTTGA	-11.5161
GCF_004797125.1	s__flavobacterium sangjuense	g__flavobacterium	f__flavobacteriaceae	o__flavobacteriales	c__bacteroidia	p__bacteroidota	d__bacteria	TRUE	TRUE	0.0015	TRUE	1	GAACACCTCCTTTCT	GGTGCGTTGAGGAGGTATCTTTGA	-11.5161
GCF_000016645.1	s__flavobacterium johnsoniae	g__flavobacterium	f__flavobacteriaceae	o__flavobacteriales	c__bacteroidia	p__bacteroidota	d__bacteria	TRUE	TRUE	0.0044	TRUE	1	GAACACCTCCTTTCT	GGTGCGTTGAGGAGGTATCTTTGA	-11.5161
GCF_008000935.1	s__flavobacterium alkalisoli	g__flavobacterium	f__flavobacteriaceae	o__flavobacteriales	c__bacteroidia	p__bacteroidota	d__bacteria	TRUE	TRUE	0.0022	TRUE	1	GAACACCTCCTTTCT	GGTGCGCTGAGGAGGTATCTTTGA	-11.5161
GCF_017352115.1	s__flavobacterium sp017352115	g__flavobacterium	f__flavobacteriaceae	o__flavobacteriales	c__bacteroidia	p__bacteroidota	d__bacteria	TRUE	TRUE	0.0044	TRUE	1	GAACACCTCCTTTCT	GGTGCGTTGAGGAGGTATCTTTGA	-11.5161
GCF_003403075.1	s__flavobacterium sp003403075	g__flavobacterium	f__flavobacteriaceae	o__flavobacteriales	c__bacteroidia	p__bacteroidota	d__bacteria	TRUE	TRUE	0.0044	TRUE	1	GAACACCTCCTTTCT	GGTGCGCTGAGGAGGTATCTTTGA	-11.5161
GCF_003076455.1	s__flavobacterium faecale	g__flavobacterium	f__flavobacteriaceae	o__flavobacteriales	c__bacteroidia	p__bacteroidota	d__bacteria	TRUE	TRUE	0.0013	TRUE	1	GAACACCTCCTTTCT	GGTGCGTTGAGGAGGTATCTTTGA	-11.5161
GCF_004355225.1	s__flavobacterium nackdongense	g__flavobacterium	f__flavobacteriaceae	o__flavobacteriales	c__bacteroidia	p__bacteroidota	d__bacteria	TRUE	TRUE	0.0018	TRUE	1	GAACACCTCCTTTCT	GGTGCGTTGAGGAGGTATCTTTGA	-11.5161
GCF_003097535.1	s__flavobacterium pallidum	g__flavobacterium	f__flavobacteriaceae	o__flavobacteriales	c__bacteroidia	p__bacteroidota	d__bacteria	TRUE	TRUE	0.0013	TRUE	1	GAACACCTCCTTTCT	GGTGCGTTGAGGAGGTATCTTTGA	-11.5161
GCF_003312915.1	s__flavobacterium sp003312915	g__flavobacterium	f__flavobacteriaceae	o__flavobacteriales	c__bacteroidia	p__bacteroidota	d__bacteria	TRUE	TRUE	0.0044	TRUE	1	GAACACCTCCTTTCT	GGTGCGTTGAGGAGGTATCTTTGA	-11.5161
GCF_003122385.1	s__flavobacterium crocinum	g__flavobacterium	f__flavobacteriaceae	o__flavobacteriales	c__bacteroidia	p__bacteroidota	d__bacteria	TRUE	TRUE	0.0044	TRUE	1	GAACACCTCCTTTCT	GGTGCGTTGAGGAGGTATCTTTGA	-11.5161
GCF_001761465.1	s__flavobacterium gilvum	g__flavobacterium	f__flavobacteriaceae	o__flavobacteriales	c__bacteroidia	p__bacteroidota	d__bacteria	TRUE	TRUE	0.0017	TRUE	1	GAACACCTCCTTTCT	GGTGCGTTGAGGAGGTATCTTTGA	-11.5161
GCF_017068455.1	s__fulvivirga sp017068455	g__fulvivirga	f__cyclobacteriaceae	o__cytophagales	c__bacteroidia	p__bacteroidota	d__bacteria	TRUE	TRUE	3.9e-06	TRUE	1	GAACACCTCCTTTCT	GAGGCTTTGAGGAGGTATCTTTGA	-11.5161
GCF_014117445.1	s__gca-014117445 sp014117445	g__gca-014117445	f__sphingomonadaceae	o__sphingomonadales	c__alphaproteobacteria	p__proteobacteria	d__bacteria	TRUE	TRUE	0.00017	TRUE	1	GATCACCTCCTTTCT	GACCTGCTGAGGAGGTTTCTTTGA	-11.5161
GCF_001735745.1	s__hel1-33-131 sp001735745	g__hel1-33-131	f__flavobacteriaceae	o__flavobacteriales	c__bacteroidia	p__bacteroidota	d__bacteria	TRUE	TRUE	0.00013	TRUE	1	GAACACCTCCTTTCT	GGAGCGTTGAGGAGGTATCTTTGA	-11.5161
GCF_014489555.1	s__hymenobacter qilianensis	g__hymenobacter	f__hymenobacteraceae	o__cytophagales	c__bacteroidia	p__bacteroidota	d__bacteria	TRUE	TRUE	0.00043	TRUE	1	GATCACCTCCTTTCT	GAGGCCCTGAGGAGGTATCTTTGA	-11.5161
GCF_000801315.1	s__hymenobacter sp000801315	g__hymenobacter	f__hymenobacteraceae	o__cytophagales	c__bacteroidia	p__bacteroidota	d__bacteria	TRUE	TRUE	0.00026	TRUE	1	GATCACCTCCTTTCT	GAGGCCCTGAGGAGGTACCTTTGA	-11.5161
GCF_006352025.1	s__hymenobacter sp006352025	g__hymenobacter	f__hymenobacteraceae	o__cytophagales	c__bacteroidia	p__bacteroidota	d__bacteria	TRUE	TRUE	0.0015	TRUE	1	GATCACCTCCTTTCT	GAGGCCCTGAGGAGGTATCTTTGA	-11.5161
GCF_008728635.1	s__hymenobacter baengnokdamensis	g__hymenobacter	f__hymenobacteraceae	o__cytophagales	c__bacteroidia	p__bacteroidota	d__bacteria	TRUE	TRUE	1.2e-06	TRUE	1	GATCACCTCCTTTCT	GAGGCTCTGAGGAGGTATCTTTGA	-11.5161
GCF_000576555.1	s__hymenobacter swuensis	g__hymenobacter	f__hymenobacteraceae	o__cytophagales	c__bacteroidia	p__bacteroidota	d__bacteria	TRUE	TRUE	0.00014	TRUE	1	GATCACCTCCTTTCT	GAGGCCCTGAGGAGGTATCTTTGA	-11.5161
GCF_001280305.1	s__hymenobacter sp001280305	g__hymenobacter	f__hymenobacteraceae	o__cytophagales	c__bacteroidia	p__bacteroidota	d__bacteria	TRUE	TRUE	0.00031	TRUE	1	GATCACCTCCTTTCT	GAGGCCCTGAGGAGGTATCTTTGA	-11.5161
GCF_004355185.1	s__hymenobacter radiodurans	g__hymenobacter	f__hymenobacteraceae	o__cytophagales	c__bacteroidia	p__bacteroidota	d__bacteria	TRUE	TRUE	0.00043	TRUE	1	GATCACCTCCTTTCT	GAGGCCCTGAGGAGGTATCTTTGA	-11.5161
GCF_001507645.1	s__hymenobacter sedentarius	g__hymenobacter	f__hymenobacteraceae	o__cytophagales	c__bacteroidia	p__bacteroidota	d__bacteria	TRUE	TRUE	0.00012	TRUE	1	GATCACCTCCTTTCT	GAGGCCCTGAGGAGGTATCTTTGA	-11.5161
GCF_013256425.1	s__hymenobacter sp013256425	g__hymenobacter	f__hymenobacteraceae	o__cytophagales	c__bacteroidia	p__bacteroidota	d__bacteria	TRUE	TRUE	1.2e-06	TRUE	1	GATCACCTCCTTTCT	GAGGCTCTGAGGAGGTATCTTTGA	-11.5161
GCF_001596155.1	s__hymenobacter sp001596155	g__hymenobacter	f__hymenobacteraceae	o__cytophagales	c__bacteroidia	p__bacteroidota	d__bacteria	TRUE	TRUE	3.5e-05	TRUE	1	GATCACCTCCTTTCT	GAGGCTCTGAGGAGGTATCTTTGA	-11.5161
GCF_012273015.1	s__hymenobacter sp012273015	g__hymenobacter	f__hymenobacteraceae	o__cytophagales	c__bacteroidia	p__bacteroidota	d__bacteria	TRUE	TRUE	0.00035	TRUE	1	GATCACCTCCTTTCT	GAGGCCCTGAGGAGGTATCTTTGA	-11.5161
GCF_006337165.1	s__hymenobacter jejuensis	g__hymenobacter	f__hymenobacteraceae	o__cytophagales	c__bacteroidia	p__bacteroidota	d__bacteria	TRUE	TRUE	3.4e-06	TRUE	1	GATCACCTCCTTTCT	GAGGCCCTGAGGAGGTACCTTTGA	-11.5161
GCF_013256625.1	s__hymenobacter sp013256625	g__hymenobacter	f__hymenobacteraceae	o__cytophagales	c__bacteroidia	p__bacteroidota	d__bacteria	TRUE	TRUE	5.9e-06	TRUE	1	GATCACCTCCTTTCT	GAGGCTCTGAGGAGGTATCTTTGA	-11.5161
GCF_000737515.1	s__hymenobacter sp000737515	g__hymenobacter	f__hymenobacteraceae	o__cytophagales	c__bacteroidia	p__bacteroidota	d__bacteria	TRUE	TRUE	9.5e-05	TRUE	1	GATCACCTCCTTTCT	GAGGCCCTGAGGAGGTATCTTTGA	-11.5161
GCF_013137895.1	s__hymenobacter sp013137895	g__hymenobacter	f__hymenobacteraceae	o__cytophagales	c__bacteroidia	p__bacteroidota	d__bacteria	TRUE	TRUE	0.00098	TRUE	1	GATCACCTCCTTTCT	GAGGCCCTGAGGAGGTACCTTTGA	-11.5161
GCF_014250515.1	s__hymenobacter sp014250515	g__hymenobacter	f__hymenobacteraceae	o__cytophagales	c__bacteroidia	p__bacteroidota	d__bacteria	TRUE	TRUE	0.0019	TRUE	1	GATCACCTCCTTTCT	GAGGCCCTGAGGAGGTATCTTTGA	-11.5161
GCF_000143145.1	s__hyphomicrobium denitrificans	g__hyphomicrobium	f__hyphomicrobiaceae	o__rhizobiales	c__alphaproteobacteria	p__proteobacteria	d__bacteria	TRUE	TRUE	1.3e-05	TRUE	1	GATCACCTCCTTTCT	GCCCTCCTGAGGAGGTCTCTTTGA	-11.5161
GCF_000253295.1	s__hyphomicrobium sp000253295	g__hyphomicrobium	f__hyphomicrobiaceae	o__rhizobiales	c__alphaproteobacteria	p__proteobacteria	d__bacteria	TRUE	TRUE	0.00062	TRUE	1	GATCACCTCCTTTCT	GCCCTCCTGAGGAGGTCTCTTTGA	-11.5161
GCF_000230975.2	s__hyphomicrobium denitrificans_a	g__hyphomicrobium	f__hyphomicrobiaceae	o__rhizobiales	c__alphaproteobacteria	p__proteobacteria	d__bacteria	TRUE	TRUE	1.9e-05	TRUE	1	GATCACCTCCTTTCT	GCCCTCCTGAGGAGGTCTCTTTGA	-11.5161
GCF_014168535.1	s__lacibacter sp014168535	g__lacibacter	f__chitinophagaceae	o__chitinophagales	c__bacteroidia	p__bacteroidota	d__bacteria	TRUE	TRUE	0.0016	TRUE	1	GAATACCTCCTTTTT	CTTGTCCTGAGGAGGTTTCTTTGA	-11.5161
GCF_000246855.1	s__niastella koreensis	g__niastella	f__chitinophagaceae	o__chitinophagales	c__bacteroidia	p__bacteroidota	d__bacteria	TRUE	TRUE	0.0012	TRUE	1	GAATACCTCCTTTTT	GGTGGACTGAGGAGGTTTCTTTGA	-11.5161
GCF_001577755.1	s__nibribacter sp001577755	g__nibribacter	f__hymenobacteraceae	o__cytophagales	c__bacteroidia	p__bacteroidota	d__bacteria	TRUE	TRUE	1.3e-05	TRUE	1	GATCACCTCCTTTCT	GAGGCTTTGAGGAGGTATCTTTGA	-11.5161
GCF_009913235.1	s__nibribacter ruber	g__nibribacter	f__hymenobacteraceae	o__cytophagales	c__bacteroidia	p__bacteroidota	d__bacteria	TRUE	TRUE	1.4e-06	TRUE	1	GATCACCTCCTTTCT	GAGGCTTTGAGGAGGTATCTTTGA	-11.5161
GCF_000183135.1	s__paludibacter propionicigenes	g__paludibacter	f__paludibacteraceae	o__bacteroidales	c__bacteroidia	p__bacteroidota	d__bacteria	TRUE	TRUE	0.0064	TRUE	1	GAACACCTCCTTTCT	TCTGCGTTGAGGAGGTATCTTTGA	-11.5161
GCF_003555545.1	s__paraflavitalea soli	g__paraflavitalea	f__chitinophagaceae	o__chitinophagales	c__bacteroidia	p__bacteroidota	d__bacteria	TRUE	TRUE	0.019	TRUE	1	GAATACCTCCTTTTT	GTGGTCCTGAGGAGGTTTCTTTGA	-11.5161
GCF_003585765.1	s__pontibacter actiniarum	g__pontibacter	f__hymenobacteraceae	o__cytophagales	c__bacteroidia	p__bacteroidota	d__bacteria	TRUE	TRUE	2.7e-05	TRUE	1	GATCACCTCCTTTCT	GAGGCCTTGAGGAGGTACCTTTGA	-11.5161
GCF_000973725.1	s__pontibacter korlensis	g__pontibacter	f__hymenobacteraceae	o__cytophagales	c__bacteroidia	p__bacteroidota	d__bacteria	TRUE	TRUE	8.9e-06	TRUE	1	GATCACCTCCTTTCT	GAGGCCTTGAGGAGGTATCTTTGA	-11.5161
GCF_010092985.1	s__pontibacter pudoricolor	g__pontibacter	f__hymenobacteraceae	o__cytophagales	c__bacteroidia	p__bacteroidota	d__bacteria	TRUE	TRUE	0.00019	TRUE	1	GATCACCTCCTTTCT	GAAGCCTTGAGGAGGTACCTTTGA	-11.5161
GCF_009931655.1	s__pontibacter russatus	g__pontibacter	f__hymenobacteraceae	o__cytophagales	c__bacteroidia	p__bacteroidota	d__bacteria	TRUE	TRUE	2.6e-05	TRUE	1	GATCACCTCCTTTCT	GAGGCCCTGAGGAGGTATCTTTGA	-11.5161
GCF_018127745.1	s__porphyromonas sp018127745	g__porphyromonas	f__porphyromonadaceae	o__bacteroidales	c__bacteroidia	p__bacteroidota	d__bacteria	TRUE	TRUE	0.0018	TRUE	1	GAACACCTCCTTTCT	CTCGCGCTGAGGAGGTACCTTTGA	-11.5161
GCF_007970185.1	s__pseudobacter ginsenosidimutans	g__pseudobacter	f__chitinophagaceae	o__chitinophagales	c__bacteroidia	p__bacteroidota	d__bacteria	TRUE	TRUE	0.0064	TRUE	1	GAATACCTCCTTTTT	GTGGTCCTGAGGAGGTTTCTTTGA	-11.5161
GCF_002966125.1	s__pukyongia salina	g__pukyongia	f__flavobacteriaceae	o__flavobacteriales	c__bacteroidia	p__bacteroidota	d__bacteria	TRUE	TRUE	4.2e-06	TRUE	1	GAACACCTCCTTTCT	GATGCGTTGAGGAGGTATCTTTGA	-11.5161
GCF_004337365.2	s__qfoi01 sp004337365	g__qfoi01	f__chitinophagaceae	o__chitinophagales	c__bacteroidia	p__bacteroidota	d__bacteria	TRUE	TRUE	0.0043	TRUE	1	GAATACCTCCTTTTT	CTTGTCTTGAGGAGGTTTCTTTGA	-11.5161
GCF_010119975.1	s__rhodocytophaga rosea	g__rhodocytophaga	f__172606-1	o__cytophagales	c__bacteroidia	p__bacteroidota	d__bacteria	TRUE	TRUE	1.1e-05	TRUE	1	GAACACCTCCTTTCT	AGCGCCTTGAGGAGGTATCTTTGA	-11.5161
GCF_001078055.1	s__rufibacter radiotolerans	g__rufibacter	f__hymenobacteraceae	o__cytophagales	c__bacteroidia	p__bacteroidota	d__bacteria	TRUE	TRUE	1.4e-05	TRUE	1	GATCACCTCCTTTCT	GAGGCGTTGAGGAGGTATCTTTGA	-11.5161
GCF_001310085.1	s__rufibacter tibetensis	g__rufibacter	f__hymenobacteraceae	o__cytophagales	c__bacteroidia	p__bacteroidota	d__bacteria	TRUE	TRUE	9.5e-06	TRUE	1	GATCACCTCCTTTCT	GAGGCGTTGAGGAGGTATCTTTGA	-11.5161
GCF_009676955.1	s__sodaliphilus pleomorphus	g__sodaliphilus	f__muribaculaceae	o__bacteroidales	c__bacteroidia	p__bacteroidota	d__bacteria	TRUE	TRUE	9.9e-05	TRUE	1	GAACACCTCCTTTCT	GATGCGTTGAGGAGGTATCTTTGA	-11.5161
GCF_002067135.1	s__spirosoma rigui	g__spirosoma	f__spirosomaceae	o__cytophagales	c__bacteroidia	p__bacteroidota	d__bacteria	TRUE	TRUE	5.9e-06	TRUE	1	GAACACCTCCTTTTT	GAGGCCCTGAGGAGGTATCTTTGA	-11.5161
GCF_001888165.1	s__syntrophotalea acetylenica	g__syntrophotalea	f__syntrophotaleaceae	o__desulfuromonadales	c__desulfuromonadia	p__desulfobacterota	d__bacteria	TRUE	TRUE	0.0011	TRUE	1	GATCACCTCCTTTCT	GACGAGCTGAGGAGGTATCTTTGA	-11.5161
GCF_000012885.1	s__syntrophotalea carbinolica	g__syntrophotalea	f__syntrophotaleaceae	o__desulfuromonadales	c__desulfuromonadia	p__desulfobacterota	d__bacteria	TRUE	TRUE	6e-06	TRUE	1	GATCACCTCCTTTCT	GATGAGCTGAGGAGGTATCTTTGA	-11.5161
GCF_000264455.2	s__tistrella mobilis	g__tistrella	f__tistrellaceae	o__tistrellales	c__alphaproteobacteria	p__proteobacteria	d__bacteria	TRUE	TRUE	1.5e-06	TRUE	1	GATCACCTCCTTTCT	GGTCTGCTGAGGAGGTATCTTTGA	-11.5161
GCF_001611275.1	s__ddh964 sp001611275		f__ddh964	o__desulfuromonadales	c__desulfuromonadia	p__desulfobacterota	d__bacteria	TRUE	TRUE	3.2e-05	TRUE	1	GATCACCTCCTTTCT	GCCGAGCTGAGGAGGTATCTTTGA	-11.5161
GCF_009731355.2	s__szua-540 sp009731355		f__szua-540	o__desulfuromonadales	c__desulfuromonadia	p__desulfobacterota	d__bacteria	TRUE	TRUE	0.00071	TRUE	1	GATCACCTCCTTTCT	GAAGAGCTGAGGAGGTACCTTTGA	-11.5161
GCF_012277295.1	s__wolbachia sp012277295	g__wolbachia	f__anaplasmataceae	o__rickettsiales	c__alphaproteobacteria	p__proteobacteria	d__bacteria	TRUE	TRUE	2.6e-05	TRUE	1	GATTACCTCCTTAGG	TCCTTAATTAGGAGGTGTCTTTGA	-11.2588
GCF_013365455.1	s__wolbachia sp013365455	g__wolbachia	f__anaplasmataceae	o__rickettsiales	c__alphaproteobacteria	p__proteobacteria	d__bacteria	TRUE	TRUE	0.0017	TRUE	1	GATTACCTCCTTAGG	TCAATTATCAGGAGGTGTCTTTGA	-11.2588
GCF_000306885.1	s__wolbachia sp000306885	g__wolbachia	f__anaplasmataceae	o__rickettsiales	c__alphaproteobacteria	p__proteobacteria	d__bacteria	TRUE	TRUE	0.0014	TRUE	1	GATTACCTCCTTAGG	TCAGTTATCAGGAGGTGTCTTTGA	-11.2588
GCF_001931755.2	s__wolbachia sp001931755	g__wolbachia	f__anaplasmataceae	o__rickettsiales	c__alphaproteobacteria	p__proteobacteria	d__bacteria	TRUE	TRUE	0.00079	TRUE	1	GATTACCTCCTTAGG	TCTCTTGTCAGGAGGTGTCTTTGA	-11.2588
GCF_013365495.1	s__wolbachia sp013365495	g__wolbachia	f__anaplasmataceae	o__rickettsiales	c__alphaproteobacteria	p__proteobacteria	d__bacteria	TRUE	TRUE	0.0026	TRUE	1	GATTACCTCCTTAGG	TCAGCTATCAGGAGGTGCCTTTGA	-11.2588
GCF_004171285.1	s__wolbachia pipientis_c	g__wolbachia	f__anaplasmataceae	o__rickettsiales	c__alphaproteobacteria	p__proteobacteria	d__bacteria	TRUE	TRUE	0.00065	TRUE	1	GATTACCTCCTTAGG	TCTCTTATCAGGAGGTGTCTTTGA	-11.2588
GCF_013365475.1	s__wolbachia sp013365475	g__wolbachia	f__anaplasmataceae	o__rickettsiales	c__alphaproteobacteria	p__proteobacteria	d__bacteria	TRUE	TRUE	0.00038	TRUE	1	GATTACCTCCTTAGG	TCAGTTATTAGGAGGTGTCTTTGA	-11.2588
GCF_000008025.1	s__wolbachia pipientis	g__wolbachia	f__anaplasmataceae	o__rickettsiales	c__alphaproteobacteria	p__proteobacteria	d__bacteria	TRUE	TRUE	6.5e-06	TRUE	1	GATTACCTCCTTAGG	TCTCTTATCAGGAGGTGTCTTTGA	-11.2588
GCF_000829315.1	s__wolbachia sp000829315	g__wolbachia	f__anaplasmataceae	o__rickettsiales	c__alphaproteobacteria	p__proteobacteria	d__bacteria	TRUE	TRUE	0.00075	TRUE	1	GATTACCTCCTTAGG	TCTGTCATTAGGAGGTGTCTTTGA	-11.2588
GCF_018141665.1	s__wolbachia sp001439985	g__wolbachia	f__anaplasmataceae	o__rickettsiales	c__alphaproteobacteria	p__proteobacteria	d__bacteria	TRUE	TRUE	0.00072	TRUE	1	GATTACCTCCTTAGG	TCTCTTATCAGGAGGTGTCTTTGA	-11.2588
GCF_012277315.1	s__wolbachia sp012277315	g__wolbachia	f__anaplasmataceae	o__rickettsiales	c__alphaproteobacteria	p__proteobacteria	d__bacteria	TRUE	TRUE	0.0019	TRUE	1	GATTACCTCCTTAGG	GCTGTTATCAGGAGGTGTCTTTGA	-11.2588
GCF_000376585.1	s__wolbachia sp000376585	g__wolbachia	f__anaplasmataceae	o__rickettsiales	c__alphaproteobacteria	p__proteobacteria	d__bacteria	TRUE	TRUE	0.00072	TRUE	1	GATTACCTCCTTAGG	TCTCTTATCAGGAGGTGTCTTTGA	-11.2588
GCF_000008385.1	s__wolbachia sp000008385	g__wolbachia	f__anaplasmataceae	o__rickettsiales	c__alphaproteobacteria	p__proteobacteria	d__bacteria	TRUE	TRUE	0.00079	TRUE	1	GATTACCTCCTTGGG	TCTGTTATCAGGAGGTGTCTTTGA	-11.2588
GCF_013365435.1	s__wolbachia sp013365435	g__wolbachia	f__anaplasmataceae	o__rickettsiales	c__alphaproteobacteria	p__proteobacteria	d__bacteria	TRUE	TRUE	0.00079	TRUE	1	GATTACCTCCTTGGG	TCTGTTATCAGGAGGTGTCTTTGA	-11.2588
GCF_000177635.2	s__desulfurispirillum indicum	g__desulfurispirillum	f__chrysiogenaceae	o__chrysiogenales	c__chrysiogenetes	p__chrysiogenota	d__bacteria	TRUE	TRUE	0.0018	TRUE	1	GATCACCTCCTTTCT	GAGTTTTTCCGGAGGTGTCTTTGA	-11.2036
GCF_014295415.1	s__altibacter sp014295415	g__altibacter	f__flavobacteriaceae	o__flavobacteriales	c__bacteroidia	p__bacteroidota	d__bacteria	TRUE	TRUE	0.00019	TRUE	1	GAACACCTCCTTTCT	GATGCGTTAAGGAGGTATCTTTGA	-11.1818
GCF_013365535.1	s__aquimarina sp013365535	g__aquimarina	f__flavobacteriaceae	o__flavobacteriales	c__bacteroidia	p__bacteroidota	d__bacteria	TRUE	TRUE	0.0032	TRUE	1	GAACACCTCCTTTCT	GTTGCGTTAAGGAGGTATCTTTGA	-11.1818
GCF_001553545.1	s__capnocytophaga haemolytica	g__capnocytophaga	f__flavobacteriaceae	o__flavobacteriales	c__bacteroidia	p__bacteroidota	d__bacteria	TRUE	TRUE	0.00058	TRUE	1	GAACACCTCCTTTCT	GGTGCGTTAAGGAGGTATCTTTGA	-11.1818
GCF_002302635.1	s__capnocytophaga stomatis	g__capnocytophaga	f__flavobacteriaceae	o__flavobacteriales	c__bacteroidia	p__bacteroidota	d__bacteria	TRUE	TRUE	0.0013	TRUE	1	GAACACCTCCTTTCT	GGTGCGTTAAGGAGGTATCTTTGA	-11.1818
GCF_002302565.1	s__capnocytophaga canimorsus	g__capnocytophaga	f__flavobacteriaceae	o__flavobacteriales	c__bacteroidia	p__bacteroidota	d__bacteria	TRUE	TRUE	0.0018	TRUE	1	GAACACCTCCTTTCT	GGTGCGTTAAGGAGGTATCTTTGA	-11.1818
GCF_002999135.1	s__capnocytophaga sp002999135	g__capnocytophaga	f__flavobacteriaceae	o__flavobacteriales	c__bacteroidia	p__bacteroidota	d__bacteria	TRUE	TRUE	0.0017	TRUE	1	GAACACCTCCTTTCT	GGTGCGTTAAGGAGGTATCTTTGA	-11.1818
GCF_019021925.1	s__cellulophaga sp019021925	g__cellulophaga	f__flavobacteriaceae	o__flavobacteriales	c__bacteroidia	p__bacteroidota	d__bacteria	TRUE	TRUE	0.014	TRUE	1	GAACACCTCCTTTCT	GGTGCGTTAAGGAGGTATCTTTGA	-11.1818
GCF_000190595.1	s__cellulophaga lytica	g__cellulophaga	f__flavobacteriaceae	o__flavobacteriales	c__bacteroidia	p__bacteroidota	d__bacteria	TRUE	TRUE	0.0036	TRUE	1	GAACACCTCCTTTCT	GGTGCGTTAAGGAGGTATCTTTGA	-11.1818
GCF_013402795.1	s__costertonia aggregata	g__costertonia	f__flavobacteriaceae	o__flavobacteriales	c__bacteroidia	p__bacteroidota	d__bacteria	TRUE	TRUE	0.0064	TRUE	1	GAACACCTCCTTTCT	GGTGCGTTAAGGAGGTATCTTTGA	-11.1818
GCF_000325705.1	s__echinicola vietnamensis	g__echinicola	f__cyclobacteriaceae	o__cytophagales	c__bacteroidia	p__bacteroidota	d__bacteria	TRUE	TRUE	6.2e-07	TRUE	1	GAACACCTCCTTTCT	ACGGCCTTAAGGAGGTATCTTTGA	-11.1818
GCF_003260975.1	s__echinicola strongylocentroti	g__echinicola	f__cyclobacteriaceae	o__cytophagales	c__bacteroidia	p__bacteroidota	d__bacteria	TRUE	TRUE	3.2e-06	TRUE	1	GAACACCTCCTTTCT	ACGGCCTTAAGGAGGTATCTTTGA	-11.1818
GCF_005281475.1	s__echinicola rosea	g__echinicola	f__cyclobacteriaceae	o__cytophagales	c__bacteroidia	p__bacteroidota	d__bacteria	TRUE	TRUE	6.2e-07	TRUE	1	GAACACCTCCTTTCT	ACGGCCTTAAGGAGGTATCTTTGA	-11.1818
GCF_006575665.1	s__echinicola sp006575665	g__echinicola	f__cyclobacteriaceae	o__cytophagales	c__bacteroidia	p__bacteroidota	d__bacteria	TRUE	TRUE	3.2e-06	TRUE	1	GAACACCTCCTTTCT	ACGGCCTTAAGGAGGTATCTTTGA	-11.1818
GCA_005943945.1	s__f202z8 sp005943945	g__f202z8	f__flavobacteriaceae	o__flavobacteriales	c__bacteroidia	p__bacteroidota	d__bacteria	TRUE	TRUE	0.0027	TRUE	1	GAACACCTCCTTTCT	GGTGCGTTAAGGAGGTATCTTTGA	-11.1818
GCF_009363055.1	s__flavobacterium haoranii	g__flavobacterium	f__flavobacteriaceae	o__flavobacteriales	c__bacteroidia	p__bacteroidota	d__bacteria	TRUE	TRUE	0.0062	TRUE	1	GAACACCTCCTTTCT	GGTGCGTTAAGGAGGTATCTTTGA	-11.1818
GCF_009792295.1	s__flavobacterium sp009792295	g__flavobacterium	f__flavobacteriaceae	o__flavobacteriales	c__bacteroidia	p__bacteroidota	d__bacteria	TRUE	TRUE	0.012	TRUE	1	GAACACCTCCTTTCT	GGTGCGTTAAGGAGGTATCTTTGA	-11.1818
GCF_000833025.1	s__flavobacterium profundi	g__flavobacterium	f__flavobacteriaceae	o__flavobacteriales	c__bacteroidia	p__bacteroidota	d__bacteria	TRUE	TRUE	0.012	TRUE	1	GAACACCTCCTTTCT	GGTGCGTTAAGGAGGTATCTTTGA	-11.1818
GCF_013874595.1	s__flavobacterium sp013874595	g__flavobacterium	f__flavobacteriaceae	o__flavobacteriales	c__bacteroidia	p__bacteroidota	d__bacteria	TRUE	TRUE	0.0036	TRUE	1	GAACACCTCCTTTCT	GGTGCGTTAAGGAGGTATCTTTGA	-11.1818
GCF_013389595.1	s__flavobacterium sp013389595	g__flavobacterium	f__flavobacteriaceae	o__flavobacteriales	c__bacteroidia	p__bacteroidota	d__bacteria	TRUE	TRUE	0.0014	TRUE	1	GAACACCTCCTTTCT	GGTGCGTTAAGGAGGTATCTTTGA	-11.1818
GCF_000455605.1	s__flavobacterium indicum	g__flavobacterium	f__flavobacteriaceae	o__flavobacteriales	c__bacteroidia	p__bacteroidota	d__bacteria	TRUE	TRUE	0.017	TRUE	1	GAACACCTCCTTTCT	GTTGCGTTAAGGAGGTATCTTTGA	-11.1818
GCF_009799805.1	s__flavobacterium phaeum_a	g__flavobacterium	f__flavobacteriaceae	o__flavobacteriales	c__bacteroidia	p__bacteroidota	d__bacteria	TRUE	TRUE	0.012	TRUE	1	GAACACCTCCTTTCT	GGTGCGTTAAGGAGGTATCTTTGA	-11.1818
GCF_013389455.1	s__flavobacterium sp001898245	g__flavobacterium	f__flavobacteriaceae	o__flavobacteriales	c__bacteroidia	p__bacteroidota	d__bacteria	TRUE	TRUE	8.1e-05	TRUE	1	GAACACCTCCTTTCT	GGTGCGTTAAGGAGGTATCTTTGA	-11.1818
GCF_003148385.1	s__flavobacterium sediminis	g__flavobacterium	f__flavobacteriaceae	o__flavobacteriales	c__bacteroidia	p__bacteroidota	d__bacteria	TRUE	TRUE	0.0015	TRUE	1	GAACACCTCCTTTCT	GGTGCGTTAAGGAGGTATCTTTGA	-11.1818
GCF_001735715.1	s__gca001735715 sp001735715	g__gca001735715	f__flavobacteriaceae	o__flavobacteriales	c__bacteroidia	p__bacteroidota	d__bacteria	TRUE	TRUE	0.0023	TRUE	1	GAACACCTCCTTTCT	GGCGCGTTAAGGAGGTATCTTTGA	-11.1818
GCF_007993795.1	s__gillisia arcticum	g__gillisia	f__flavobacteriaceae	o__flavobacteriales	c__bacteroidia	p__bacteroidota	d__bacteria	TRUE	TRUE	0.0015	TRUE	1	GAACACCTCCTTTCT	GTAGCGTTAAGGAGGTATCTTTGA	-11.1818
GCF_006159205.1	s__gillisia flava	g__gillisia	f__flavobacteriaceae	o__flavobacteriales	c__bacteroidia	p__bacteroidota	d__bacteria	TRUE	TRUE	0.00081	TRUE	1	GAACACCTCCTTTCT	GTTGCGTTAAGGAGGTATCTTTGA	-11.1818
GCF_003024155.1	s__gramella fulva	g__gramella	f__flavobacteriaceae	o__flavobacteriales	c__bacteroidia	p__bacteroidota	d__bacteria	TRUE	TRUE	2.3e-05	TRUE	1	GAACACCTCCTTTCT	GTTGCGTTAAGGAGGTATCTTTGA	-11.1818
GCF_000060345.1	s__gramella forsetii	g__gramella	f__flavobacteriaceae	o__flavobacteriales	c__bacteroidia	p__bacteroidota	d__bacteria	TRUE	TRUE	0.0017	TRUE	1	GAACACCTCCTTTCT	GTTGCGTTAAGGAGGTATCTTTGA	-11.1818
GCF_001951155.1	s__gramella flava	g__gramella	f__flavobacteriaceae	o__flavobacteriales	c__bacteroidia	p__bacteroidota	d__bacteria	TRUE	TRUE	0.0051	TRUE	1	GAACACCTCCTTTCT	GTTGCGTTAAGGAGGTATCTTTGA	-11.1818
GCF_001889005.1	s__gramella salexigens	g__gramella	f__flavobacteriaceae	o__flavobacteriales	c__bacteroidia	p__bacteroidota	d__bacteria	TRUE	TRUE	2.3e-05	TRUE	1	GAACACCTCCTTTCT	GTTGCGTTAAGGAGGTATCTTTGA	-11.1818
GCF_000328625.1	s__halobacteroides halobius	g__halobacteroides	f__halobacteroidaceae	o__halobacteroidales	c__halanaerobiia	p__firmicutes_f	d__bacteria	TRUE	TRUE	0.0015	TRUE	1	GATCACCTCCTTTCT	AAAGAATTAAGGAGGTCTCTTTGA	-11.1818
GCF_003149515.1	s__hymenobacter nivis	g__hymenobacter	f__hymenobacteraceae	o__cytophagales	c__bacteroidia	p__bacteroidota	d__bacteria	TRUE	TRUE	0.0031	TRUE	1	GATCACCTCCTTTCT	GAGGCCCTAAGGAGGTATCTTTGA	-11.1818
GCF_001562275.1	s__hymenobacter sp001562275	g__hymenobacter	f__hymenobacteraceae	o__cytophagales	c__bacteroidia	p__bacteroidota	d__bacteria	TRUE	TRUE	0.0031	TRUE	1	GATCACCTCCTTTCT	GAGGCCCTAAGGAGGTATCTTTGA	-11.1818
GCF_000503895.1	s__hyphomicrobium nitrativorans	g__hyphomicrobium	f__hyphomicrobiaceae	o__rhizobiales	c__alphaproteobacteria	p__proteobacteria	d__bacteria	TRUE	TRUE	7.3e-06	TRUE	1	GATCACCTCCTTTCT	GACCTCTTAAGGAGGTATCTTTGA	-11.1818
GCF_003352465.1	s__kordia sp003352465	g__kordia	f__flavobacteriaceae	o__flavobacteriales	c__bacteroidia	p__bacteroidota	d__bacteria	TRUE	TRUE	0.00016	TRUE	1	GAACACCTCCTTTCT	GGTGCGTTAAGGAGGTATCTTTGA	-11.1818
GCF_009901525.1	s__kordia antarctica	g__kordia	f__flavobacteriaceae	o__flavobacteriales	c__bacteroidia	p__bacteroidota	d__bacteria	TRUE	TRUE	9.1e-05	TRUE	1	GAACACCTCCTTTCT	GGTGCGTTAAGGAGGTATCTTTGA	-11.1818
GCF_002356295.1	s__labilibaculum antarcticum	g__labilibaculum	f__marinifilaceae	o__bacteroidales	c__bacteroidia	p__bacteroidota	d__bacteria	TRUE	TRUE	2.5e-05	TRUE	1	GAACACCTCCTTTCT	GCAGCGCTAAGGAGGTATCTTTGA	-11.1818
GCF_000166395.1	s__leadbetterella byssophila	g__leadbetterella	f__spirosomaceae	o__cytophagales	c__bacteroidia	p__bacteroidota	d__bacteria	TRUE	TRUE	2.9e-05	TRUE	1	GAACACCTCCTTTAT	ACGGCACTAAGGAGGTATCTTTGA	-11.1818
GCF_000496595.1	s__liberibacter americanus	g__liberibacter	f__rhizobiaceae_a	o__rhizobiales_a	c__alphaproteobacteria	p__proteobacteria	d__bacteria	TRUE	TRUE	5.9e-06	TRUE	1	GATCACCTCCTTTCT	CAACTGCTAAGGAGGTCTCTTTAA	-11.1818
GCF_000325745.1	s__liberibacter crescens	g__liberibacter	f__rhizobiaceae_a	o__rhizobiales_a	c__alphaproteobacteria	p__proteobacteria	d__bacteria	TRUE	TRUE	4.6e-05	TRUE	1	GATCACCTCCTTTCT	AAGCTGCTAAGGAGGTCTCTTTGA	-11.1818
GCA_015476115.1	s__mar-2010-188 sp015476115	g__mar-2010-188	f__flavobacteriaceae	o__flavobacteriales	c__bacteroidia	p__bacteroidota	d__bacteria	TRUE	TRUE	0.00013	TRUE	1	GAACACCTCCTTTCT	GGCGCGTTAAGGAGGTATCTTTGA	-11.1818
GCF_002269385.1	s__maribacter cobaltidurans	g__maribacter	f__flavobacteriaceae	o__flavobacteriales	c__bacteroidia	p__bacteroidota	d__bacteria	TRUE	TRUE	0.031	TRUE	1	GAACACCTCCTTTCT	GGTGCGTTAAGGAGGTATCTTTGA	-11.1818
GCF_003970695.1	s__maribacter sp002742365	g__maribacter	f__flavobacteriaceae	o__flavobacteriales	c__bacteroidia	p__bacteroidota	d__bacteria	TRUE	TRUE	0.015	TRUE	1	GAACACCTCCTTTCT	GGTGCGTTAAGGAGGTATCTTTGA	-11.1818
GCF_001913155.1	s__maribacter hydrothermalis	g__maribacter	f__flavobacteriaceae	o__flavobacteriales	c__bacteroidia	p__bacteroidota	d__bacteria	TRUE	TRUE	0.083	TRUE	1	GAACACCTCCTTTCT	GGTGCGTTAAGGAGGTATCTTTGA	-11.1818
GCF_000153165.2	s__maribacter_a sp000153165	g__maribacter_a	f__flavobacteriaceae	o__flavobacteriales	c__bacteroidia	p__bacteroidota	d__bacteria	TRUE	TRUE	0.0037	TRUE	1	GAACACCTCCTTTCT	GGCGCGTTAAGGAGGTATCTTTGA	-11.1818
GCF_000224085.1	s__muricauda ruestringensis	g__muricauda	f__flavobacteriaceae	o__flavobacteriales	c__bacteroidia	p__bacteroidota	d__bacteria	TRUE	TRUE	0.0043	TRUE	1	GAACACCTCCTTTCT	GGTGCGTTAAGGAGGTATCTTTGA	-11.1818
GCF_011068285.1	s__muricauda sp011068285	g__muricauda	f__flavobacteriaceae	o__flavobacteriales	c__bacteroidia	p__bacteroidota	d__bacteria	TRUE	TRUE	0.0043	TRUE	1	GAACACCTCCTTTCT	GGTGCGTTAAGGAGGTATCTTTGA	-11.1818
GCF_003269425.1	s__muricauda maritima	g__muricauda	f__flavobacteriaceae	o__flavobacteriales	c__bacteroidia	p__bacteroidota	d__bacteria	TRUE	TRUE	0.0077	TRUE	1	GAACACCTCCTTTCT	GGTGCGTTAAGGAGGTATCTTTGA	-11.1818
GCF_000963865.1	s__muricauda_a lutaonensis	g__muricauda_a	f__flavobacteriaceae	o__flavobacteriales	c__bacteroidia	p__bacteroidota	d__bacteria	TRUE	TRUE	0.0043	TRUE	1	GAACACCTCCTTTCT	GGTGCGTTAAGGAGGTATCTTTGA	-11.1818
GCF_004139715.1	s__muriicola sp004139715	g__muriicola	f__flavobacteriaceae	o__flavobacteriales	c__bacteroidia	p__bacteroidota	d__bacteria	TRUE	TRUE	0.0043	TRUE	1	GAACACCTCCTTTCT	GGTGCGTTAAGGAGGTATCTTTGA	-11.1818
GCF_002201795.1	s__natronoflexus saponilacus	g__natronoflexus	f__marinilabiliaceae	o__bacteroidales	c__bacteroidia	p__bacteroidota	d__bacteria	TRUE	TRUE	0.0093	TRUE	1	GAACACCTCCTTTCT	TTGGCGTTAAGGAGGTATCTTTGA	-11.1818
GCF_001654455.1	s__niabella ginsenosidivorans	g__niabella	f__chitinophagaceae	o__chitinophagales	c__bacteroidia	p__bacteroidota	d__bacteria	TRUE	TRUE	0.0024	TRUE	1	GAATACCTCCTTTTT	CTCGGGATAAGGAGGTTTCTTTGA	-11.1818
GCF_000243115.2	s__niabella soli	g__niabella	f__chitinophagaceae	o__chitinophagales	c__bacteroidia	p__bacteroidota	d__bacteria	TRUE	TRUE	0.007	TRUE	1	GAATACCTCCTTTTT	CTCGGGGTAAGGAGGTTTCTTTGA	-11.1818
GCF_007971225.1	s__panacibacter ginsenosidivorans	g__panacibacter	f__chitinophagaceae	o__chitinophagales	c__bacteroidia	p__bacteroidota	d__bacteria	TRUE	TRUE	0.012	TRUE	1	GAATACCTCCTTTTT	AGTGTTCTAAGGAGGTTTCTTTGA	-11.1818
GCF_000024125.1	s__robiginitalea biformata	g__robiginitalea	f__flavobacteriaceae	o__flavobacteriales	c__bacteroidia	p__bacteroidota	d__bacteria	TRUE	TRUE	0.001	TRUE	1	GAACACCTCCTTTCT	GGCGCGTTAAGGAGGTATCTTTGA	-11.1818
GCF_001430825.1	s__sediminicola sp001430825	g__sediminicola	f__flavobacteriaceae	o__flavobacteriales	c__bacteroidia	p__bacteroidota	d__bacteria	TRUE	TRUE	0.014	TRUE	1	GAACACCTCCTTTCT	GGTGCGTTAAGGAGGTATCTTTGA	-11.1818
GCF_003574965.1	s__solirubrum oligotrophum	g__solirubrum	f__hymenobacteraceae	o__cytophagales	c__bacteroidia	p__bacteroidota	d__bacteria	TRUE	TRUE	0.00032	TRUE	1	GATCACCTCCTTTCT	GAGGCCTTAAGGAGGTATCTTTGA	-11.1818
GCF_014117325.1	s__spirosoma sp014117325	g__spirosoma	f__spirosomaceae	o__cytophagales	c__bacteroidia	p__bacteroidota	d__bacteria	TRUE	TRUE	4e-06	TRUE	1	GAACACCTCCTTTTT	GAGGCTCTAAGGAGGTATCTTTGA	-11.1818
GCF_001547735.1	s__thermosulfidibacter takaii	g__thermosulfidibacter	f__thermosulfidibacteraceae	o__thermosulfidibacterales	c__thermosulfidibacteria	p__thermosulfidibacterota	d__bacteria	TRUE	TRUE	0.00011	TRUE	1	GATCACCTCCTTTCT	GAAAAACTAAGGAGGTATCTTTGA	-11.1818
GCF_011207455.1	s__thermosulfuriphilus ammonigenes	g__thermosulfuriphilus	f__st65	o__thermodesulfobacteriales	c__thermodesulfobacteria	p__desulfobacterota	d__bacteria	TRUE	TRUE	4.9e-06	TRUE	1	GATCACCTCCTTTCT	GATCTCCTAAGGAGGTATCTTTGA	-11.1818
GCF_000973105.1	s__zobellia galactanivorans	g__zobellia	f__flavobacteriaceae	o__flavobacteriales	c__bacteroidia	p__bacteroidota	d__bacteria	TRUE	TRUE	0.002	TRUE	1	GAACACCTCCTTTCT	GGTGCGTTAAGGAGGTATCTTTGA	-11.1818
GCF_000287335.1	s__gcf-000287335 sp000287335	g__gcf-000287335	f__enterobacteriaceae	o__enterobacterales	c__gammaproteobacteria	p__proteobacteria	d__bacteria	TRUE	TRUE	6.3e-06	TRUE	1	GATCACCTCCTTAAC	GGTATTTTGAGGGGGCATCTTTGA	-10.886
GCF_000204135.1	s__chlamydophila pecorum	g__chlamydophila	f__chlamydiaceae	o__chlamydiales	c__chlamydiia	p__chlamydiota	d__bacteria	TRUE	TRUE	0.0022	TRUE	1	GATCACCTCCTTTTA	GCGTTAGCAGGGAGGTCTCTTTGA	-10.8456
GCF_000023125.1	s__dyadobacter fermentans	g__dyadobacter	f__spirosomaceae	o__cytophagales	c__bacteroidia	p__bacteroidota	d__bacteria	TRUE	TRUE	2.5e-05	TRUE	1	GAACACCTCCTTTCT	GAGGCTTTGGGGAGGTATCTTTGA	-10.8024
GCF_016894445.1	s__dyadobacter sp016894445	g__dyadobacter	f__spirosomaceae	o__cytophagales	c__bacteroidia	p__bacteroidota	d__bacteria	TRUE	TRUE	7.5e-06	TRUE	1	GAACACCTCCTTTCT	GAGGCTTTGGGGAGGTATCTTTGA	-10.8024
GCF_001611675.1	s__pontibacter akesuensis	g__pontibacter	f__hymenobacteraceae	o__cytophagales	c__bacteroidia	p__bacteroidota	d__bacteria	TRUE	TRUE	7.4e-05	TRUE	1	GATCACCTCCTTTCT	GAGGCCTTGGGGAGGTATCTTTGA	-10.8024
GCF_000212375.1	s__porphyromonas asaccharolytica	g__porphyromonas	f__porphyromonadaceae	o__bacteroidales	c__bacteroidia	p__bacteroidota	d__bacteria	TRUE	TRUE	0.00059	TRUE	1	GAACACCTCCTTTCT	AAGGCGCTGGGGAGGTATCTTTGA	-10.8024
GCF_000737325.1	s__sandaracinus amylolyticus	g__sandaracinus	f__sandaracinaceae	o__polyangiales	c__polyangia	p__myxococcota	d__bacteria	TRUE	TRUE	0.0025	TRUE	1	GATCACCTCCTTTCT	GAAGCGCTGGGGAGGTATCTTTGA	-10.8024
GCF_001988955.1	s__spirosoma montaniterrae	g__spirosoma	f__spirosomaceae	o__cytophagales	c__bacteroidia	p__bacteroidota	d__bacteria	TRUE	TRUE	2.3e-05	TRUE	1	GAACACCTCCTTTCT	GAGGCTCTGGGGAGGTATCTTTGA	-10.8024
GCF_009662475.1	s__acidithiobacillus thiooxidans	g__acidithiobacillus	f__acidithiobacillaceae	o__acidithiobacillales	c__gammaproteobacteria	p__proteobacteria	d__bacteria	TRUE	TRUE	2.8e-06	TRUE	1	GATCACCTCCTTTAA	AGCGGCCTGAGGGGGTATCTTTGA	-10.7419
GCF_000021485.1	s__acidithiobacillus ferrooxidans	g__acidithiobacillus	f__acidithiobacillaceae	o__acidithiobacillales	c__gammaproteobacteria	p__proteobacteria	d__bacteria	TRUE	TRUE	0.0001	TRUE	1	GATCACCTCCTTTAA	GCGGGCCTGAGGGGGTATCTTTGA	-10.7419
GCF_003966655.1	s__acidithiobacillus ferridurans	g__acidithiobacillus	f__acidithiobacillaceae	o__acidithiobacillales	c__gammaproteobacteria	p__proteobacteria	d__bacteria	TRUE	TRUE	6.3e-05	TRUE	1	GATCACCTCCTTTAA	GCGGGCCTGAGGGGGTATCTTTGA	-10.7419
GCF_003258705.1	s__arcticibacterium luteifluviistationis	g__arcticibacterium	f__spirosomaceae	o__cytophagales	c__bacteroidia	p__bacteroidota	d__bacteria	TRUE	TRUE	0.00061	TRUE	1	GAACACCTCCTTTTT	ACGGCTTTGAGGGGGTATCTTTGA	-10.7419
GCF_001278055.1	s__deferrimonas soudanensis	g__deferrimonas	f__wtl	o__desulfuromonadales	c__desulfuromonadia	p__desulfobacterota	d__bacteria	TRUE	TRUE	0.00024	TRUE	1	GATCACCTCCTTTCT	ATAGAGCTGAGGGGGTATCTTTGA	-10.7419
GCF_011299555.1	s__dysgonomonas sp011299555	g__dysgonomonas	f__dysgonomonadaceae	o__bacteroidales	c__bacteroidia	p__bacteroidota	d__bacteria	TRUE	TRUE	0.0025	TRUE	1	GAACACCTCCTTTCT	CAAGCGTTGAGGGGGTACCTTTGA	-10.7419
GCF_001632845.1	s__ectothiorhodospira sp001632845	g__ectothiorhodospira	f__ectothiorhodospiraceae	o__ectothiorhodospirales	c__gammaproteobacteria	p__proteobacteria	d__bacteria	TRUE	TRUE	2.1e-07	TRUE	1	GATCACCTCCTTTAA	GACGCCCTGAGGGGGTATCTTTGA	-10.7419
GCF_002356555.2	s__halorhodospira halochloris	g__halorhodospira	f__halorhodospiraceae	o__nitrococcales	c__gammaproteobacteria	p__proteobacteria	d__bacteria	TRUE	TRUE	1.4e-08	TRUE	1	GATCACCTCCTTTAA	CAAGCCCTGAGGGGGTATCTTTGA	-10.7419
GCF_000015585.1	s__halorhodospira halophila	g__halorhodospira	f__halorhodospiraceae	o__nitrococcales	c__gammaproteobacteria	p__proteobacteria	d__bacteria	TRUE	TRUE	1.2e-08	TRUE	1	GATCACCTCCTTTAA	GAGGCCCTGAGGGGGTATCTTTGA	-10.7419
GCF_001663815.1	s__halothiobacillus sp001663815	g__halothiobacillus	f__halothiobacillaceae	o__halothiobacillales	c__gammaproteobacteria	p__proteobacteria	d__bacteria	TRUE	TRUE	8.7e-09	TRUE	1	GATCACCTCCTTTAA	GCCGCGCTGAGGGGGTATCTTTGA	-10.7419
GCF_016615955.1	s__luteimonas sp016615955	g__luteimonas	f__xanthomonadaceae	o__xanthomonadales	c__gammaproteobacteria	p__proteobacteria	d__bacteria	TRUE	TRUE	2.4e-08	TRUE	1	GATCACCTCCTTTAG	GATGCGCTGAGGGGGTTTCTTTGA	-10.7419
GCF_004803715.2	s__luteimonas yindakuii	g__luteimonas	f__xanthomonadaceae	o__xanthomonadales	c__gammaproteobacteria	p__proteobacteria	d__bacteria	TRUE	TRUE	2.9e-08	TRUE	1	GATCACCTCCTTTAG	GAAGCGCTGAGGGGGTTTCTTTGA	-10.7419
GCF_004118975.1	s__luteimonas sp004118975	g__luteimonas	f__xanthomonadaceae	o__xanthomonadales	c__gammaproteobacteria	p__proteobacteria	d__bacteria	TRUE	TRUE	3.4e-08	TRUE	1	GATCACCTCCTTTAG	GAAGCGCTGAGGGGGTTTCTTTGA	-10.7419
GCF_018847975.1	s__lysobacter sp018847975	g__lysobacter	f__xanthomonadaceae	o__xanthomonadales	c__gammaproteobacteria	p__proteobacteria	d__bacteria	TRUE	TRUE	1.5e-09	TRUE	1	GATCACCTCCTTTAG	GATTCGCTGAGGGGGTATCTTTGA	-10.7419
GCF_018406645.1	s__lysobacter_a helvus	g__lysobacter_a	f__xanthomonadaceae	o__xanthomonadales	c__gammaproteobacteria	p__proteobacteria	d__bacteria	TRUE	TRUE	3.2e-08	TRUE	1	GATCACCTCCTTTAG	CATGCGCTGAGGGGGTATCTTTGA	-10.7419
GCF_000801295.1	s__monju sp000801295	g__monju	f__sedimenticolaceae	o__chromatiales	c__gammaproteobacteria	p__proteobacteria	d__bacteria	TRUE	TRUE	8e-09	TRUE	1	GATCACCTCCTTTAC	GACGCCCTGAGGGGGTATCTTTGA	-10.7419
GCF_000012845.1	s__parabacteroides distasonis	g__parabacteroides	f__tannerellaceae	o__bacteroidales	c__bacteroidia	p__bacteroidota	d__bacteria	TRUE	TRUE	0.0063	TRUE	1	GAACACCTCCTTTCT	AAGGCGCTGAGGGGGTATCTTTGA	-10.7419
GCF_900095795.1	s__petrimonas mucosa	g__petrimonas	f__dysgonomonadaceae	o__bacteroidales	c__bacteroidia	p__bacteroidota	d__bacteria	TRUE	TRUE	0.004	TRUE	1	GAACACCTCCTTTCT	CAGGCGCTGAGGGGGTATCTTTGA	-10.7419
GCF_000010505.1	s__porphyromonas gingivalis	g__porphyromonas	f__porphyromonadaceae	o__bacteroidales	c__bacteroidia	p__bacteroidota	d__bacteria	TRUE	TRUE	0.0016	TRUE	1	GAACACCTCCTTTCT	GATGCGCTGAGGGGGTATCTTTGA	-10.7419
GCF_900638305.1	s__porphyromonas_a cangingivalis	g__porphyromonas_a	f__porphyromonadaceae	o__bacteroidales	c__bacteroidia	p__bacteroidota	d__bacteria	TRUE	TRUE	0.0015	TRUE	1	GAACACCTCCTTTCT	GATGCGCTGAGGGGGTATCTTTGA	-10.7419
GCF_900095135.1	s__proteiniphilum saccharofermentans	g__proteiniphilum	f__dysgonomonadaceae	o__bacteroidales	c__bacteroidia	p__bacteroidota	d__bacteria	TRUE	TRUE	0.0014	TRUE	1	GAACACCTCCTTTCT	AACGCGCTGAGGGGGTATCTTTGA	-10.7419
GCF_000218895.1	s__runella slithyformis	g__runella	f__spirosomaceae	o__cytophagales	c__bacteroidia	p__bacteroidota	d__bacteria	TRUE	TRUE	1.1e-06	TRUE	1	GAACACCTCCTTTCT	TCGGCTTTGAGGGGGTATCTTTGA	-10.7419
GCF_003325355.1	s__runella sp003325355	g__runella	f__spirosomaceae	o__cytophagales	c__bacteroidia	p__bacteroidota	d__bacteria	TRUE	TRUE	2.3e-05	TRUE	1	GAACACCTCCTTTCT	TCGGCTTTGAGGGGGTATCTTTGA	-10.7419
GCF_003711225.1	s__runella sp003711225	g__runella	f__spirosomaceae	o__cytophagales	c__bacteroidia	p__bacteroidota	d__bacteria	TRUE	TRUE	6.8e-07	TRUE	1	GAACACCTCCTTTCT	TCGGCTTTGAGGGGGTATCTTTGA	-10.7419
GCF_000485905.1	s__spiribacter curvatus	g__spiribacter	f__nitrococcaceae	o__nitrococcales	c__gammaproteobacteria	p__proteobacteria	d__bacteria	TRUE	TRUE	2.4e-05	TRUE	1	GATCACCTCCTTTAA	GAGTCCCTGAGGGGGTATCTTTGA	-10.7419
GCF_000319575.2	s__spiribacter salinus	g__spiribacter	f__nitrococcaceae	o__nitrococcales	c__gammaproteobacteria	p__proteobacteria	d__bacteria	TRUE	TRUE	7.5e-08	TRUE	1	GATCACCTCCTTTAA	GAGTCCCTGAGGGGGTACCTTTGA	-10.7419
GCF_009676705.1	s__spiribacter sp009676705	g__spiribacter	f__nitrococcaceae	o__nitrococcales	c__gammaproteobacteria	p__proteobacteria	d__bacteria	TRUE	TRUE	1.9e-06	TRUE	1	GATCACCTCCTTTAA	GAGTCCCTGAGGGGGTATCTTTGA	-10.7419
GCF_012849055.1	s__spirosoma sp012849055	g__spirosoma	f__spirosomaceae	o__cytophagales	c__bacteroidia	p__bacteroidota	d__bacteria	TRUE	TRUE	3.6e-06	TRUE	1	GAACACCTCCTTTCT	GAGGCTTTGAGGGGGTATCTTTGA	-10.7419
GCF_011604685.1	s__spirosoma aureum	g__spirosoma	f__spirosomaceae	o__cytophagales	c__bacteroidia	p__bacteroidota	d__bacteria	TRUE	TRUE	2.9e-06	TRUE	1	GAACACCTCCTTTCT	GAGGCCTTGAGGGGGTATCTTTGA	-10.7419
GCF_013127955.1	s__spirosoma taeanense	g__spirosoma	f__spirosomaceae	o__cytophagales	c__bacteroidia	p__bacteroidota	d__bacteria	TRUE	TRUE	3.6e-06	TRUE	1	GAACACCTCCTTTCT	GAGGCCCTGAGGGGGTACCTTTGA	-10.7419
GCF_000974425.1	s__spirosoma radiotolerans	g__spirosoma	f__spirosomaceae	o__cytophagales	c__bacteroidia	p__bacteroidota	d__bacteria	TRUE	TRUE	3.6e-06	TRUE	1	GAACACCTCCTTTTT	GAGGCCCTGAGGGGGTATCTTTGA	-10.7419
GCF_002831565.1	s__spirosoma pollinicola	g__spirosoma	f__spirosomaceae	o__cytophagales	c__bacteroidia	p__bacteroidota	d__bacteria	TRUE	TRUE	3.6e-06	TRUE	1	GAACACCTCCTTTTT	GAGGCTTTGAGGGGGTATCTTTGA	-10.7419
GCF_002056795.1	s__spirosoma aerolatum	g__spirosoma	f__spirosomaceae	o__cytophagales	c__bacteroidia	p__bacteroidota	d__bacteria	TRUE	TRUE	3.6e-06	TRUE	1	GAACACCTCCTTTTT	GAGGCTCTGAGGGGGTATCTTTGA	-10.7419
GCF_004001245.1	s__sulfurivermis fontis	g__sulfurivermis	f__thiohalomonadaceae	o__thiohalomonadales	c__gammaproteobacteria	p__proteobacteria	d__bacteria	TRUE	TRUE	1.8e-06	TRUE	1	GATCACCTCCTTTCA	GACGCCCTGAGGGGGTATCTTTGA	-10.7419
GCF_001887775.1	s__syntrophotalea_a acetylenivorans	g__syntrophotalea_a	f__syntrophotaleaceae	o__desulfuromonadales	c__desulfuromonadia	p__desulfobacterota	d__bacteria	TRUE	TRUE	6e-05	TRUE	1	GATCACCTCCTTTCT	GATGAGCTGAGGGGGTATCTTTGA	-10.7419
GCF_011302915.1	s__thermomonas sp011302915	g__thermomonas	f__xanthomonadaceae	o__xanthomonadales	c__gammaproteobacteria	p__proteobacteria	d__bacteria	TRUE	TRUE	7.6e-08	TRUE	1	GATCACCTCCTTTTG	GATGCGCTGAGGGGGTTTCTTTGA	-10.7419
GCF_006337105.1	s__thermomonas sp006337105	g__thermomonas	f__xanthomonadaceae	o__xanthomonadales	c__gammaproteobacteria	p__proteobacteria	d__bacteria	TRUE	TRUE	6.3e-08	TRUE	1	GATCACCTCCTTTTG	GATGCGCTGAGGGGGTTTCTTTGA	-10.7419
GCF_000021985.1	s__thioalkalivibrio_a sulfidiphilus	g__thioalkalivibrio_a	f__ectothiorhodospiraceae	o__ectothiorhodospirales	c__gammaproteobacteria	p__proteobacteria	d__bacteria	TRUE	TRUE	7.1e-08	TRUE	1	GATCACCTCCTTTCA	GACGCCTTGAGGGGGTATCTTTGA	-10.7419
GCF_002356355.1	s__thiohalobacter thiocyanaticus_a	g__thiohalobacter	f__thiohalobacteraceae	o__thiohalobacterales	c__gammaproteobacteria	p__proteobacteria	d__bacteria	TRUE	TRUE	3.1e-08	TRUE	1	GATCACCTCCTTTAA	GAGTCCCTGAGGGGGTATCTTTGA	-10.7419
GCF_017901135.1	s__thiothrix sp017901135	g__thiothrix	f__thiotrichaceae	o__thiotrichales	c__gammaproteobacteria	p__proteobacteria	d__bacteria	TRUE	TRUE	4.5e-08	TRUE	1	GATCACCTCCTTTAC	GACGCTCTGAGGGGGTATCTTTGA	-10.7419
GCF_017901155.1	s__thiothrix sp017901155	g__thiothrix	f__thiotrichaceae	o__thiotrichales	c__gammaproteobacteria	p__proteobacteria	d__bacteria	TRUE	TRUE	4.5e-08	TRUE	1	GATCACCTCCTTTAC	GACGCTCTGAGGGGGTATCTTTGA	-10.7419
GCF_017901175.1	s__thiothrix unzii	g__thiothrix	f__thiotrichaceae	o__thiotrichales	c__gammaproteobacteria	p__proteobacteria	d__bacteria	TRUE	TRUE	4.5e-08	TRUE	1	GATCACCTCCTTTAC	GACGCTCTGAGGGGGTATCTTTGA	-10.7419
GCF_014725735.1	s__wenzhouxiangella sp014725735	g__wenzhouxiangella	f__wenzhouxiangellaceae	o__xanthomonadales	c__gammaproteobacteria	p__proteobacteria	d__bacteria	TRUE	TRUE	4.3e-06	TRUE	1	GATCACCTCCTTTAA	CGGGCGCTGAGGGGGTATCTTTGA	-10.7419
GCF_011801475.1	s__xylella fastidiosa	g__xylella	f__xanthomonadaceae	o__xanthomonadales	c__gammaproteobacteria	p__proteobacteria	d__bacteria	TRUE	TRUE	5.5e-09	TRUE	1	GATCACCTCCTTTTG	ATTTCGCTGAGGGGGTATCTTTGA	-10.7419
GCF_013177435.1	s__xylella taiwanensis	g__xylella	f__xanthomonadaceae	o__xanthomonadales	c__gammaproteobacteria	p__proteobacteria	d__bacteria	TRUE	TRUE	8e-07	TRUE	1	GATCACCTCCTTTTG	ATCTCGCTGAGGGGGTATCTTTGA	-10.7419
GCF_001305575.3	s__beggiatoa leptomitoformis	g__beggiatoa	f__beggiatoaceae	o__beggiatoales	c__gammaproteobacteria	p__proteobacteria	d__bacteria	TRUE	TRUE	8.5e-09	TRUE	1	GATCACCTCCTTTAA	AATGCGTTAAGGGGGTATCTTTGA	-10.4077
GCF_000223215.1	s__brachyspira intermedia	g__brachyspira	f__brachyspiraceae	o__brachyspirales	c__brachyspirae	p__spirochaetota	d__bacteria	TRUE	TRUE	0.00012	TRUE	1	GATCACCTCCTTTAT	GAAATATTAAGGGGGTATCTTTGA	-10.4077
GCF_000325665.1	s__brachyspira pilosicoli	g__brachyspira	f__brachyspiraceae	o__brachyspirales	c__brachyspirae	p__spirochaetota	d__bacteria	TRUE	TRUE	5.7e-06	TRUE	1	GATCACCTCCTTTAT	GAAATTTTAAGGGGGTATCTTTGA	-10.4077
GCF_000092845.1	s__brachyspira murdochii	g__brachyspira	f__brachyspiraceae	o__brachyspirales	c__brachyspirae	p__spirochaetota	d__bacteria	TRUE	TRUE	3.8e-06	TRUE	1	GATCACCTCCTTTAT	GAAATATTAAGGGGGTATCTTTGA	-10.4077
GCF_001676785.2	s__brachyspira hyodysenteriae	g__brachyspira	f__brachyspiraceae	o__brachyspirales	c__brachyspirae	p__spirochaetota	d__bacteria	TRUE	TRUE	0.00012	TRUE	1	GATCACCTCCTTTAT	GAAATATTAAGGGGGTATCTTTGA	-10.4077
GCF_002214805.1	s__brachyspira hampsonii	g__brachyspira	f__brachyspiraceae	o__brachyspirales	c__brachyspirae	p__spirochaetota	d__bacteria	TRUE	TRUE	7.7e-06	TRUE	1	GATCACCTCCTTTAT	GAAGTATTAAGGGGGTATCTTTGA	-10.4077
GCF_000191045.1	s__desulfurobacterium thermolithotrophum	g__desulfurobacterium	f__desulfurobacteriaceae	o__desulfurobacteriales	c__desulfurobacteriia	p__aquificota	d__bacteria	TRUE	TRUE	0.0039	TRUE	1	GATCACCTCCTTTTA	TTTGAAATAAGGGGGTATTTTTGA	-10.4077
GCF_000283555.1	s__dwaynesavagella sp000283555	g__dwaynesavagella	f__clostridiaceae	o__clostridiales	c__clostridia	p__firmicutes_a	d__bacteria	TRUE	TRUE	0.00022	TRUE	1	GATCACCTCCTTTCT	GATCTTATAAGGGGGTTTCTTTGA	-10.4077
GCF_000270205.1	s__dwaynesavagella sp000270205	g__dwaynesavagella	f__clostridiaceae	o__clostridiales	c__clostridia	p__firmicutes_a	d__bacteria	TRUE	TRUE	0.00055	TRUE	1	GATCACCTCCTTTCT	GATGTTATAAGGGGGTTTCTTTGA	-10.4077
GCF_003019675.1	s__fusobacterium_a ulcerans	g__fusobacterium_a	f__fusobacteriaceae	o__fusobacteriales	c__fusobacteriia	p__fusobacteriota	d__bacteria	TRUE	TRUE	2.1e-06	TRUE	1	GATCACCTCCTTTCT	AGTGATATAAGGGGGTCTCTTTGA	-10.4077
GCF_900637705.1	s__fusobacterium_a varium	g__fusobacterium_a	f__fusobacteriaceae	o__fusobacteriales	c__fusobacteriia	p__fusobacteriota	d__bacteria	TRUE	TRUE	1e-05	TRUE	1	GATCACCTCCTTTCT	ATTGATATAAGGGGGTCTCTTTGA	-10.4077
GCF_900683735.1	s__fusobacterium_a ulcerans_a	g__fusobacterium_a	f__fusobacteriaceae	o__fusobacteriales	c__fusobacteriia	p__fusobacteriota	d__bacteria	TRUE	TRUE	2.2e-05	TRUE	1	GATCACCTCCTTTCT	GTTGATATAAGGGGGTCTCTTTGA	-10.4077
GCF_015624425.1	s__kinneretia sp015624425	g__kinneretia	f__burkholderiaceae	o__burkholderiales	c__gammaproteobacteria	p__proteobacteria	d__bacteria	TRUE	TRUE	4.6e-07	TRUE	1	GATCACCTCCTTTCT	GACGCGCTAAGGGGGTATCTTTGA	-10.4077
GCF_000195335.1	s__marinithermus hydrothermalis	g__marinithermus	f__marinithermaceae	o__deinococcales	c__deinococci	p__deinococcota	d__bacteria	TRUE	TRUE	0.0067	TRUE	1	GATCACCTCCTTTCT	GACGCCCTAAGGGGGTATCTTTGA	-10.4077
GCF_000279145.1	s__melioribacter roseus	g__melioribacter	f__melioribacteraceae	o__ignavibacteriales	c__ignavibacteria	p__bacteroidota	d__bacteria	TRUE	TRUE	9.1e-08	TRUE	1	GATCACCTCCTTTCT	GAAAATCTAAGGGGGTATCTTTAA	-10.4077
GCF_017310505.1	s__methylacidiphilum sp004421255	g__methylacidiphilum	f__methylacidiphilaceae	o__methylacidiphilales	c__verrucomicrobiae	p__verrucomicrobiota	d__bacteria	TRUE	TRUE	0.0019	TRUE	1	GATCACCTCCTTTCT	GTTGTCTTAAGGGGGTTTCTTTGA	-10.4077
GCF_001653795.1	s__mitsuaria sp001653795	g__mitsuaria	f__burkholderiaceae	o__burkholderiales	c__gammaproteobacteria	p__proteobacteria	d__bacteria	TRUE	TRUE	4.9e-07	TRUE	1	GATCACCTCCTTTCT	GACGCGCTAAGGGGGTACCTTTGA	-10.4077
GCF_001295365.1	s__parageobacillus thermoglucosidasius	g__parageobacillus	f__anoxybacillaceae	o__bacillales	c__bacilli	p__firmicutes	d__bacteria	TRUE	TRUE	5e-07	TRUE	1	GATCACCTCCTTTCT	GCGGAAATAAGGGGGTCTCTTTGA	-10.4077
GCF_003688615.2	s__parageobacillus toebii	g__parageobacillus	f__anoxybacillaceae	o__bacillales	c__bacilli	p__firmicutes	d__bacteria	TRUE	TRUE	5e-07	TRUE	1	GATCACCTCCTTTCT	GCGGAAATAAGGGGGTCTCTTTGA	-10.4077
GCF_001477625.1	s__paucibacter_a sp001477625	g__paucibacter_a	f__burkholderiaceae	o__burkholderiales	c__gammaproteobacteria	p__proteobacteria	d__bacteria	TRUE	TRUE	1.3e-06	TRUE	1	GATCACCTCCTTTCT	GACGCGCTAAGGGGGTATCTTTGA	-10.4077
GCF_008329925.1	s__sphaerotilus sulfidivorans	g__sphaerotilus	f__burkholderiaceae	o__burkholderiales	c__gammaproteobacteria	p__proteobacteria	d__bacteria	TRUE	TRUE	3.8e-07	TRUE	1	GATCACCTCCTTTCT	ACCGCGCTAAGGGGGTATCTTTGA	-10.4077
GCF_013375035.1	s__spirosoma sp013375035	g__spirosoma	f__spirosomaceae	o__cytophagales	c__bacteroidia	p__bacteroidota	d__bacteria	TRUE	TRUE	3.6e-06	TRUE	1	GAACACCTCCTTTCT	GAGGCTCTAAGGGGGTATCTTTGA	-10.4077
GCF_006965485.1	s__spirosoma sp006965485	g__spirosoma	f__spirosomaceae	o__cytophagales	c__bacteroidia	p__bacteroidota	d__bacteria	TRUE	TRUE	3.6e-06	TRUE	1	GAACACCTCCTTTTT	GAGGCTCTAAGGGGGTATCTTTGA	-10.4077
GCF_003546865.1	s__suicoccus acidiformans	g__suicoccus	f__aerococcaceae	o__lactobacillales	c__bacilli	p__firmicutes	d__bacteria	TRUE	TRUE	1.3e-05	TRUE	1	GATCACCTCCTTTCT	GCTAGTATAAGGGGGTCTCTTTGA	-10.4077
GCF_000185805.1	s__thermovibrio ammonificans	g__thermovibrio	f__desulfurobacteriaceae	o__desulfurobacteriales	c__desulfurobacteriia	p__aquificota	d__bacteria	TRUE	TRUE	2e-05	TRUE	1	GATCACCTCCTTTTA	GCCGAAATAAGGGGGTATTTTTGA	-10.4077
GCF_002028405.1	s__thiomonas intermedia	g__thiomonas	f__burkholderiaceae	o__burkholderiales	c__gammaproteobacteria	p__proteobacteria	d__bacteria	TRUE	TRUE	6e-09	TRUE	1	GATCACCTCCTTTCT	CAAGCGCTAAGGGGGTATCTTTGA	-10.4077
GCF_001677435.1	s__woeseia oceani	g__woeseia	f__woeseiaceae	o__woeseiales	c__gammaproteobacteria	p__proteobacteria	d__bacteria	TRUE	TRUE	4.3e-08	TRUE	1	GATCACCTCCTTTAA	GAGGCGTTAAGGGGGTACCTTTGA	-10.4077
GCF_000193205.1	s__aerococcus urinae_a	g__aerococcus	f__aerococcaceae	o__lactobacillales	c__bacilli	p__firmicutes	d__bacteria	TRUE	TRUE	0.00014	TRUE	1	GATCACCTCCTTTCT	GCCAGCTTCGGGAGGTCTCTTTGA	-10.3029
GCF_001543105.1	s__aerococcus christensenii	g__aerococcus	f__aerococcaceae	o__lactobacillales	c__bacilli	p__firmicutes	d__bacteria	TRUE	TRUE	0.00023	TRUE	1	GATCACCTCCTTTCT	GCTAGTTTCGGGAGGTCTCTTTGA	-10.3029
GCF_001543175.1	s__aerococcus urinae	g__aerococcus	f__aerococcaceae	o__lactobacillales	c__bacilli	p__firmicutes	d__bacteria	TRUE	TRUE	0.0001	TRUE	1	GATCACCTCCTTTCT	ACCAGTTTCGGGAGGTCTCTTTGA	-10.3029
GCF_000219875.1	s__alicyclobacillus acidocaldarius_a	g__alicyclobacillus	f__alicyclobacillaceae	o__alicyclobacillales	c__bacilli	p__firmicutes	d__bacteria	TRUE	TRUE	3.8e-05	TRUE	1	GATCACCTCCTTTCT	GCGGATTTCGGGAGGTCTCTTTGA	-10.3029
GCF_000024285.1	s__alicyclobacillus acidocaldarius	g__alicyclobacillus	f__alicyclobacillaceae	o__alicyclobacillales	c__bacilli	p__firmicutes	d__bacteria	TRUE	TRUE	3.8e-05	TRUE	1	GATCACCTCCTTTCT	GCGGACTTCGGGAGGTCTCTTTGA	-10.3029
GCF_017298635.1	s__alicyclobacillus_b ferrooxydans_b	g__alicyclobacillus_b	f__alicyclobacillaceae	o__alicyclobacillales	c__bacilli	p__firmicutes	d__bacteria	TRUE	TRUE	1.7e-05	TRUE	1	GATCACCTCCTTTCT	GCGGATATCGGGAGGTCTCTTTGA	-10.3029
GCF_000195575.1	s__carnobacterium_a sp000195575	g__carnobacterium_a	f__carnobacteriaceae	o__lactobacillales	c__bacilli	p__firmicutes	d__bacteria	TRUE	TRUE	9.8e-05	TRUE	1	GATCACCTCCTTTCT	AACGGTTTTGGGAGGTCTCTTTGA	-10.3029
GCF_000024005.1	s__chitinophaga pinensis	g__chitinophaga	f__chitinophagaceae	o__chitinophagales	c__bacteroidia	p__bacteroidota	d__bacteria	TRUE	TRUE	0.043	TRUE	1	GAATACCTCCTTTTT	CATGTCCTGGGAGGTTTTCTTTGA	-10.3029
GCF_010093065.1	s__chitinophaga agri	g__chitinophaga	f__chitinophagaceae	o__chitinophagales	c__bacteroidia	p__bacteroidota	d__bacteria	TRUE	TRUE	0.043	TRUE	1	GAATACCTCCTTTTT	CATGTCCTGGGAGGTTTTCTTTGA	-10.3029
GCF_002557795.1	s__chitinophaga caeni	g__chitinophaga	f__chitinophagaceae	o__chitinophagales	c__bacteroidia	p__bacteroidota	d__bacteria	TRUE	TRUE	0.031	TRUE	1	GAATACCTCCTTTTT	CATGTCCTGGGAGGTTTTCTTTGA	-10.3029
GCF_018255755.1	s__chitinophaga sp018255755	g__chitinophaga	f__chitinophagaceae	o__chitinophagales	c__bacteroidia	p__bacteroidota	d__bacteria	TRUE	TRUE	0.016	TRUE	1	GAATACCTCCTTTTT	TACGTCCTGGGAGGTTTTCTTTAA	-10.3029
GCF_008086345.1	s__chitinophaga sp008086345	g__chitinophaga	f__chitinophagaceae	o__chitinophagales	c__bacteroidia	p__bacteroidota	d__bacteria	TRUE	TRUE	0.012	TRUE	1	GAATACCTCCTTTTT	TACGTCCTGGGAGGTTTTCTTTAA	-10.3029
GCF_012516355.1	s__chitinophaga sp012516355	g__chitinophaga	f__chitinophagaceae	o__chitinophagales	c__bacteroidia	p__bacteroidota	d__bacteria	TRUE	TRUE	0.013	TRUE	1	GAATACCTCCTTTTT	TATGTCCTGGGAGGTTTTCTTTAA	-10.3029
GCF_000204255.1	s__chlamydophila psittaci	g__chlamydophila	f__chlamydiaceae	o__chlamydiales	c__chlamydiia	p__chlamydiota	d__bacteria	TRUE	TRUE	0.021	TRUE	1	GATCACCTCCTTTTA	GCATTAGCCGGGAGGTCTCTTTGA	-10.3029
GCF_000009945.1	s__chlamydophila felis	g__chlamydophila	f__chlamydiaceae	o__chlamydiales	c__chlamydiia	p__chlamydiota	d__bacteria	TRUE	TRUE	0.0086	TRUE	1	GATCACCTCCTTTTA	GCTTTAGCCGGGAGGTCTCTTTGA	-10.3029
GCF_900239975.1	s__chlamydophila sp900239975	g__chlamydophila	f__chlamydiaceae	o__chlamydiales	c__chlamydiia	p__chlamydiota	d__bacteria	TRUE	TRUE	0.074	TRUE	1	GATCACCTCCTTTTA	GCTTTAGCCGGGAGGTCTCTTTGA	-10.3029
GCF_002895085.1	s__chlamydophila abortus	g__chlamydophila	f__chlamydiaceae	o__chlamydiales	c__chlamydiia	p__chlamydiota	d__bacteria	TRUE	TRUE	0.025	TRUE	1	GATCACCTCCTTTTA	GCATTAGCCGGGAGGTCTCTTTGA	-10.3029
GCF_000007605.1	s__chlamydophila caviae	g__chlamydophila	f__chlamydiaceae	o__chlamydiales	c__chlamydiia	p__chlamydiota	d__bacteria	TRUE	TRUE	0.017	TRUE	1	GATCACCTCCTTTTA	GCTTTAGCCGGGAGGTCTCTTTGA	-10.3029
GCF_018343815.1	s__chlamydophila sp018343815	g__chlamydophila	f__chlamydiaceae	o__chlamydiales	c__chlamydiia	p__chlamydiota	d__bacteria	TRUE	TRUE	0.0076	TRUE	1	GATCACCTCCTTTTA	GCTTTAGCCGGGAGGTCTCTTTGA	-10.3029
GCF_900239945.1	s__chlamydophila sp900239945	g__chlamydophila	f__chlamydiaceae	o__chlamydiales	c__chlamydiia	p__chlamydiota	d__bacteria	TRUE	TRUE	0.0077	TRUE	1	GATCACCTCCTTTTT	TTGTTAGCTGGGAGGTCTCTTTGA	-10.3029
GCF_012913485.1	s__haloferula lutea	g__haloferula	f__akkermansiaceae	o__verrucomicrobiales	c__verrucomicrobiae	p__verrucomicrobiota	d__bacteria	TRUE	TRUE	0.033	TRUE	1	GATCACCTCCTTTCT	ACCCAGCTCGGGAGGTATCTTTGA	-10.3029
GCF_002005405.1	s__jeotgalibaca dankookensis	g__jeotgalibaca	f__aerococcaceae	o__lactobacillales	c__bacilli	p__firmicutes	d__bacteria	TRUE	TRUE	0.00059	TRUE	1	GATCACCTCCTTTCT	CAGAGTTTTGGGAGGTCTCTTTGA	-10.3029
GCF_011299095.1	s__jeotgalibaca porci	g__jeotgalibaca	f__aerococcaceae	o__lactobacillales	c__bacilli	p__firmicutes	d__bacteria	TRUE	TRUE	0.0011	TRUE	1	GATCACCTCCTTTCT	CAAAGCTTTGGGAGGTCTCTTTGA	-10.3029
GCF_000092905.1	s__kyrpidia tusciae	g__kyrpidia	f__kyrpidiaceae	o__kyrpidiales	c__bacilli	p__firmicutes	d__bacteria	TRUE	TRUE	2.4e-05	TRUE	1	GATCACCTCCTTTCT	GACGAAATCGGGAGGTCTCTTTGA	-10.3029
GCF_002804065.1	s__kyrpidia spormannii	g__kyrpidia	f__kyrpidiaceae	o__kyrpidiales	c__bacilli	p__firmicutes	d__bacteria	TRUE	TRUE	2.4e-05	TRUE	1	GATCACCTCCTTTCT	GACGAAATCGGGAGGTCTCTTTGA	-10.3029
GCF_018314255.1	s__lentilactobacillus buchneri	g__lentilactobacillus	f__lactobacillaceae	o__lactobacillales	c__bacilli	p__firmicutes	d__bacteria	TRUE	TRUE	8.1e-05	TRUE	1	GATCACCTCCTTTCT	GATGGTTTTGGGAGGTCACTTTGA	-10.3029
GCF_000016825.1	s__limosilactobacillus reuteri	g__limosilactobacillus	f__lactobacillaceae	o__lactobacillales	c__bacilli	p__firmicutes	d__bacteria	TRUE	TRUE	6.3e-05	TRUE	1	GATCACCTCCTTTCT	ACGCACTTCGGGAGGTCTCTTTGA	-10.3029
GCA_003072625.1	s__limosilactobacillus reuteri_d	g__limosilactobacillus	f__lactobacillaceae	o__lactobacillales	c__bacilli	p__firmicutes	d__bacteria	TRUE	TRUE	0.00025	TRUE	1	GATCACCTCCTTTCT	ACGCACTTCGGGAGGTCTCTTTGA	-10.3029
GCF_001618865.1	s__luteitalea pratensis	g__luteitalea	f__vicinamibacteraceae	o__vicinamibacterales	c__vicinamibacteria	p__acidobacteriota	d__bacteria	TRUE	TRUE	0.0049	TRUE	1	GATCACCTCCTTTCT	GTCGAACTCGGGAGGTATCTTTGA	-10.3029
GCF_000829395.1	s__paucilactobacillus hokkaidonensis	g__paucilactobacillus	f__lactobacillaceae	o__lactobacillales	c__bacilli	p__firmicutes	d__bacteria	TRUE	TRUE	0.00026	TRUE	1	GATCACCTCCTTTCT	GCTAACTTCGGGAGGTCGCTTTGA	-10.3029
GCF_000024845.1	s__rhodothermus marinus	g__rhodothermus	f__rhodothermaceae	o__rhodothermales	c__rhodothermia	p__bacteroidota	d__bacteria	TRUE	TRUE	0.0044	TRUE	1	GATCACCTCCTAAAG	GACACGCTCGGGAGGTTTCTTTGA	-10.3029
GCF_015097055.1	s__skt53 sp015097055	g__skt53	f__effusibacillaceae	o__tumebacillales	c__bacilli	p__firmicutes	d__bacteria	TRUE	TRUE	0.00012	TRUE	1	GATCACCTCCTTTCT	GCTGATATTGGGAGGTCTCTTTGA	-10.3029
GCF_016406125.1	s__so9 sp016406125	g__so9	f__alicyclobacillaceae	o__alicyclobacillales	c__bacilli	p__firmicutes	d__bacteria	TRUE	TRUE	0.00011	TRUE	1	GATCACCTCCTTTCT	GCGGATATCGGGAGGTCTCTTTGA	-10.3029
GCF_009738225.1	s__streptococcus sp001556435	g__streptococcus	f__streptococcaceae	o__lactobacillales	c__bacilli	p__firmicutes	d__bacteria	TRUE	TRUE	8.2e-06	TRUE	1	GATCACCTCCTTTCT	GTGAGCTTCGGGAGGTCTCTTTGA	-10.3029
GCF_000785515.1	s__streptococcus salivarius	g__streptococcus	f__streptococcaceae	o__lactobacillales	c__bacilli	p__firmicutes	d__bacteria	TRUE	TRUE	8.2e-06	TRUE	1	GATCACCTCCTTTCT	GTGAGCTTCGGGAGGTCTCTTTGA	-10.3029
GCF_010120595.1	s__streptococcus thermophilus	g__streptococcus	f__streptococcaceae	o__lactobacillales	c__bacilli	p__firmicutes	d__bacteria	TRUE	TRUE	8.2e-06	TRUE	1	GATCACCTCCTTTCT	GTGAGCTTCGGGAGGTCTCTTTGA	-10.3029
GCF_002162355.1	s__tumebacillus_a avium	g__tumebacillus_a	f__tumebacillaceae	o__tumebacillales	c__bacilli	p__firmicutes	d__bacteria	TRUE	TRUE	0.00015	TRUE	1	GATCACCTCCTTTCT	GCGGACATCGGGAGGTCTCTTTGA	-10.3029
GCF_002243515.1	s__tumebacillus_a algifaecis	g__tumebacillus_a	f__tumebacillaceae	o__tumebacillales	c__bacilli	p__firmicutes	d__bacteria	TRUE	TRUE	0.00015	TRUE	1	GATCACCTCCTTTCT	GCGGACATCGGGAGGTCTCTTTGA	-10.3029
GCF_004359375.1	s__acetilactobacillus jinshanensis	g__acetilactobacillus	f__lactobacillaceae	o__lactobacillales	c__bacilli	p__firmicutes	d__bacteria	TRUE	TRUE	0.00086	TRUE	1	GATCACCTCCTTTCT	CACGGCTTTAGGAGGTCACTTTGA	-10.2547
GCF_001483965.1	s__carnobacterium_a sp001483965	g__carnobacterium_a	f__carnobacteriaceae	o__lactobacillales	c__bacilli	p__firmicutes	d__bacteria	TRUE	TRUE	2.4e-05	TRUE	1	GATCACCTCCTTTCT	GCCGGTTTCAGGAGGTCTCTTTGA	-10.2547
GCF_000471025.2	s__chlamydophila gallinacea	g__chlamydophila	f__chlamydiaceae	o__chlamydiales	c__chlamydiia	p__chlamydiota	d__bacteria	TRUE	TRUE	0.08	TRUE	1	GATCACCTCCTTTTA	GATTTGGCCAGGAGGTTTTTTTGA	-10.2547
GCF_003612895.1	s__db6-ix sp003612895	g__db6-ix	f__bacteriovoracaceae	o__bacteriovoracales	c__bacteriovoracia	p__bdellovibrionota	d__bacteria	TRUE	TRUE	0.0077	TRUE	1	GATCACCTCCTTTTA	GAAAGTCTTAGGAGGTCACTTTGA	-10.2547
GCF_000021645.1	s__dictyoglomus turgidum	g__dictyoglomus	f__dictyoglomaceae	o__dictyoglomales	c__dictyoglomia	p__dictyoglomota	d__bacteria	TRUE	TRUE	0.022	TRUE	1	GATCACCTCCTTTCT	AACAAGTTAGGAGGTTATCTTTGA	-10.2547
GCA_000271405.2	s__enterococcus_b hirae	g__enterococcus_b	f__enterococcaceae	o__lactobacillales	c__bacilli	p__firmicutes	d__bacteria	TRUE	TRUE	4.4e-08	TRUE	1	GATCACCTCCTTTCT	ACAAGTTTCAGGAGGTCTCTTTGA	-10.2547
GCF_011397115.1	s__enterococcus_c saigonensis	g__enterococcus_c	f__enterococcaceae	o__lactobacillales	c__bacilli	p__firmicutes	d__bacteria	TRUE	TRUE	6.9e-08	TRUE	1	GATCACCTCCTTTCT	CAATCATTTAGGAGGTCTCTTTGA	-10.2547
GCF_014217355.1	s__fusobacterium hwasookii	g__fusobacterium	f__fusobacteriaceae	o__fusobacteriales	c__fusobacteriia	p__fusobacteriota	d__bacteria	TRUE	TRUE	5.9e-06	TRUE	1	GATCACCTCCTTTCT	GAAAATATTAGGAGGTCTCTTTGA	-10.2547
GCF_016724785.1	s__fusobacterium canifelinum	g__fusobacterium	f__fusobacteriaceae	o__fusobacteriales	c__fusobacteriia	p__fusobacteriota	d__bacteria	TRUE	TRUE	5.9e-06	TRUE	1	GATCACCTCCTTTCT	GAAAATATTAGGAGGTCTCTTTGA	-10.2547
GCF_002763915.1	s__fusobacterium periodonticum_d	g__fusobacterium	f__fusobacteriaceae	o__fusobacteriales	c__fusobacteriia	p__fusobacteriota	d__bacteria	TRUE	TRUE	5.1e-06	TRUE	1	GATCACCTCCTTTCT	GATAGTATTAGGAGGTCTCTTTGA	-10.2547
GCF_001457555.1	s__fusobacterium polymorphum	g__fusobacterium	f__fusobacteriaceae	o__fusobacteriales	c__fusobacteriia	p__fusobacteriota	d__bacteria	TRUE	TRUE	5.9e-06	TRUE	1	GATCACCTCCTTTCT	GAAAATATCAGGAGGTCTCTTTGA	-10.2547
GCF_000158275.2	s__fusobacterium animalis	g__fusobacterium	f__fusobacteriaceae	o__fusobacteriales	c__fusobacteriia	p__fusobacteriota	d__bacteria	TRUE	TRUE	8.7e-06	TRUE	1	GATCACCTCCTTTCT	GAAAACATTAGGAGGTCTCTTTGA	-10.2547
GCF_004006635.1	s__fusobacterium_c necrophorum	g__fusobacterium_c	f__fusobacteriaceae	o__fusobacteriales	c__fusobacteriia	p__fusobacteriota	d__bacteria	TRUE	TRUE	0.0033	TRUE	1	GATCACCTCCTTTCT	GAAGAGATCAGGAGGTCTCTTTGA	-10.2547
GCF_003019695.1	s__fusobacterium_c gonidiaformans	g__fusobacterium_c	f__fusobacteriaceae	o__fusobacteriales	c__fusobacteriia	p__fusobacteriota	d__bacteria	TRUE	TRUE	1.8e-05	TRUE	1	GATCACCTCCTTTCT	GAAGACATCAGGAGGTCTCTTTGA	-10.2547
GCF_000828515.1	s__ishikawaella capsulata	g__ishikawaella	f__enterobacteriaceae	o__enterobacterales	c__gammaproteobacteria	p__proteobacteria	d__bacteria	TRUE	TRUE	2.6e-06	TRUE	1	GATTACCTCCTTAAA	GATATCCTTAGGAGGTCACTTTAA	-10.2547
GCF_011100465.1	s__jeotgalibaca arthritidis	g__jeotgalibaca	f__aerococcaceae	o__lactobacillales	c__bacilli	p__firmicutes	d__bacteria	TRUE	TRUE	0.00022	TRUE	1	GATCACCTCCTTTCT	GCAAGCTTCAGGAGGTCTCTTTGA	-10.2547
GCF_003072465.1	s__kinetoplastibacterium sorsogonicusi	g__kinetoplastibacterium	f__burkholderiaceae_a	o__burkholderiales	c__gammaproteobacteria	p__proteobacteria	d__bacteria	TRUE	TRUE	0.0021	TRUE	1	GATCACCTCCTTTAA	GCTCTTCTCAGGAGGTATCTTTGA	-10.2547
GCF_003584685.1	s__lactobacillus paragasseri	g__lactobacillus	f__lactobacillaceae	o__lactobacillales	c__bacilli	p__firmicutes	d__bacteria	TRUE	TRUE	1.4e-08	TRUE	1	GATCACCTCCTTTCT	GAACATTTTAGGAGGTCTCTTTGA	-10.2547
GCF_000014425.1	s__lactobacillus gasseri	g__lactobacillus	f__lactobacillaceae	o__lactobacillales	c__bacilli	p__firmicutes	d__bacteria	TRUE	TRUE	1.4e-08	TRUE	1	GATCACCTCCTTTCT	GAGCATTTTAGGAGGTCTCTTTGA	-10.2547
GCF_000785105.2	s__lentilactobacillus curieae	g__lentilactobacillus	f__lactobacillaceae	o__lactobacillales	c__bacilli	p__firmicutes	d__bacteria	TRUE	TRUE	5.7e-06	TRUE	1	GATCACCTCCTTTCT	GCTGGCTTTAGGAGGTCTCTTTGA	-10.2547
GCF_000183665.1	s__liberibacter solanacearum	g__liberibacter	f__rhizobiaceae_a	o__rhizobiales_a	c__alphaproteobacteria	p__proteobacteria	d__bacteria	TRUE	TRUE	2.1e-06	TRUE	1	GATCACCTCCTTTCT	GAACTGCTTAGGAGGTCTCTTTGA	-10.2547
GCF_000590865.3	s__liberibacter asiaticus	g__liberibacter	f__rhizobiaceae_a	o__rhizobiales_a	c__alphaproteobacteria	p__proteobacteria	d__bacteria	TRUE	TRUE	1.8e-05	TRUE	1	GATCACCTCCTTTCT	GAACTGCTTAGGAGGTCTCTTTGA	-10.2547
GCF_018137965.1	s__luteolibacter sp018137965	g__luteolibacter	f__akkermansiaceae	o__verrucomicrobiales	c__verrucomicrobiae	p__verrucomicrobiota	d__bacteria	TRUE	TRUE	0.022	TRUE	1	GATCACCTCCTTTCT	TCGAAGCTCAGGAGGTATCTTTGA	-10.2547
GCF_003932755.1	s__methylotuvimicrobium sp003932755	g__methylotuvimicrobium	f__methylomonadaceae	o__methylococcales	c__gammaproteobacteria	p__proteobacteria	d__bacteria	TRUE	TRUE	3.1e-10	TRUE	1	GATCACCTCCTTACA	GACGCGCTTAGGAGGTATCTTTGA	-10.2547
GCF_000968535.2	s__methylotuvimicrobium alcaliphilum	g__methylotuvimicrobium	f__methylomonadaceae	o__methylococcales	c__gammaproteobacteria	p__proteobacteria	d__bacteria	TRUE	TRUE	6.3e-10	TRUE	1	GATCACCTCCTTACA	GACGCGCTTAGGAGGTATCTTTGA	-10.2547
GCF_000219175.1	s__moranella endobia	g__moranella	f__enterobacteriaceae	o__enterobacterales	c__gammaproteobacteria	p__proteobacteria	d__bacteria	TRUE	TRUE	0.00086	TRUE	1	GATCACCTCCTTACC	GCTGTTCTCAGGAGGTATCTTTGA	-10.2547
GCF_900327275.1	s__orientia tsutsugamushi	g__orientia	f__rickettsiaceae	o__rickettsiales	c__alphaproteobacteria	p__proteobacteria	d__bacteria	TRUE	TRUE	0.0023	TRUE	1	GATTACCTCCTTTAA	GAGTTAATTAGGAGGTCGCTTTGA	-10.2547
GCF_000971765.1	s__pantoea_a carbekii	g__pantoea_a	f__enterobacteriaceae	o__enterobacterales	c__gammaproteobacteria	p__proteobacteria	d__bacteria	TRUE	TRUE	0.0024	TRUE	1	GATCACCTCCTTATT	GGTGTTCTTAGGAGGTATCTTTGA	-10.2547
GCF_002982135.1	s__pediococcus inopinatus	g__pediococcus	f__lactobacillaceae	o__lactobacillales	c__bacilli	p__firmicutes	d__bacteria	TRUE	TRUE	2.6e-06	TRUE	1	GATCACCTCCTTTCT	AATGACTTTAGGAGGTCACTTTGA	-10.2547
GCF_003391335.1	s__purcelliella pentastirinorum	g__purcelliella	f__enterobacteriaceae_a	o__enterobacterales_a	c__gammaproteobacteria	p__proteobacteria	d__bacteria	TRUE	TRUE	1.1e-06	TRUE	1	GATCACCTCCTTAAA	AAAAATATTAGGAGGTATTTTTAA	-10.2547
GCF_002953735.1	s__streptococcus pluranimalium	g__streptococcus	f__streptococcaceae	o__lactobacillales	c__bacilli	p__firmicutes	d__bacteria	TRUE	TRUE	7e-08	TRUE	1	GATCACCTCCTTTCT	ACTAGCTTCAGGAGGTCTCTTTGA	-10.2547
GCF_001598035.1	s__streptococcus halotolerans	g__streptococcus	f__streptococcaceae	o__lactobacillales	c__bacilli	p__firmicutes	d__bacteria	TRUE	TRUE	1.2e-07	TRUE	1	GATCACCTCCTTTCT	ACTAGCTTCAGGAGGTCTCTTTGA	-10.2547
GCF_003086355.1	s__streptococcus chenjunshii	g__streptococcus	f__streptococcaceae	o__lactobacillales	c__bacilli	p__firmicutes	d__bacteria	TRUE	TRUE	2e-08	TRUE	1	GATCACCTCCTTTCT	ACTGACTTCAGGAGGTCTCTTTGA	-10.2547
GCF_002000985.1	s__streptococcus gallolyticus	g__streptococcus	f__streptococcaceae	o__lactobacillales	c__bacilli	p__firmicutes	d__bacteria	TRUE	TRUE	8.8e-08	TRUE	1	GATCACCTCCTTTCT	ACTAGCTTCAGGAGGTCTCTTTGA	-10.2547
GCF_001642085.1	s__streptococcus pantholopis	g__streptococcus	f__streptococcaceae	o__lactobacillales	c__bacilli	p__firmicutes	d__bacteria	TRUE	TRUE	2e-08	TRUE	1	GATCACCTCCTTTCT	ACTGACTTCAGGAGGTCTCTTTGA	-10.2547
GCF_900636575.1	s__streptococcus canis	g__streptococcus	f__streptococcaceae	o__lactobacillales	c__bacilli	p__firmicutes	d__bacteria	TRUE	TRUE	2.2e-07	TRUE	1	GATCACCTCCTTTCT	ACTAGCTTCAGGAGGTCTCTTTGA	-10.2547
GCF_900475675.1	s__streptococcus lutetiensis	g__streptococcus	f__streptococcaceae	o__lactobacillales	c__bacilli	p__firmicutes	d__bacteria	TRUE	TRUE	8.8e-08	TRUE	1	GATCACCTCCTTTCT	ACTAGCTTCAGGAGGTCTCTTTGA	-10.2547
GCF_901542335.1	s__streptococcus porcinus_a	g__streptococcus	f__streptococcaceae	o__lactobacillales	c__bacilli	p__firmicutes	d__bacteria	TRUE	TRUE	5.2e-08	TRUE	1	GATCACCTCCTTTCT	ACTAGCTTCAGGAGGTCTCTTTGA	-10.2547
GCF_002055535.1	s__streptococcus pyogenes	g__streptococcus	f__streptococcaceae	o__lactobacillales	c__bacilli	p__firmicutes	d__bacteria	TRUE	TRUE	5.2e-08	TRUE	1	GATCACCTCCTTTCT	ACTAGCTTCAGGAGGTCTCTTTGA	-10.2547
GCF_018137985.1	s__streptococcus sp018137985	g__streptococcus	f__streptococcaceae	o__lactobacillales	c__bacilli	p__firmicutes	d__bacteria	TRUE	TRUE	3.9e-06	TRUE	1	GATCACCTCCTTTCT	GAATCTTTCAGGAGGTCTCTTTGA	-10.2547
GCF_900475595.1	s__streptococcus uberis	g__streptococcus	f__streptococcaceae	o__lactobacillales	c__bacilli	p__firmicutes	d__bacteria	TRUE	TRUE	5.2e-08	TRUE	1	GATCACCTCCTTTCT	ACTAGCTTCAGGAGGTCTCTTTGA	-10.2547
GCF_900475415.1	s__streptococcus porcinus	g__streptococcus	f__streptococcaceae	o__lactobacillales	c__bacilli	p__firmicutes	d__bacteria	TRUE	TRUE	5.2e-08	TRUE	1	GATCACCTCCTTTCT	ACTAGCTTCAGGAGGTCTCTTTGA	-10.2547
GCF_000009905.1	s__symbiobacterium thermophilum	g__symbiobacterium	f__symbiobacteriaceae	o__symbiobacteriales	c__symbiobacteriia	p__firmicutes_e	d__bacteria	TRUE	TRUE	3.6e-05	TRUE	1	GATCACCTCCTTTCT	ATCGAACTCAGGAGGTCTCTTTGA	-10.2547
GCF_003795125.1	s__tetragenococcus osmophilus	g__tetragenococcus	f__enterococcaceae	o__lactobacillales	c__bacilli	p__firmicutes	d__bacteria	TRUE	TRUE	8.1e-08	TRUE	1	GATCACCTCCTTTCT	GCAAGTTTTAGGAGGTCTCTTTGA	-10.2547
GCF_000020965.1	s__dictyoglomus thermophilum	g__dictyoglomus	f__dictyoglomaceae	o__dictyoglomales	c__dictyoglomia	p__dictyoglomota	d__bacteria	TRUE	TRUE	0.02	TRUE	1	GATCACCTCCTTTCT	AATAAGTTAGGGGGGTATCTTTGA	-10.0715
GCF_001628715.1	s__acetobacter oryzifermentans	g__acetobacter	f__acetobacteraceae	o__acetobacterales	c__alphaproteobacteria	p__proteobacteria	d__bacteria	TRUE	TRUE	0.00023	TRUE	1	GATCACCTCCTTTCA	GCACTGCTGAGGAGGCATCTTTAA	-9.72894
GCF_004014775.2	s__acetobacter oryzoeni	g__acetobacter	f__acetobacteraceae	o__acetobacterales	c__alphaproteobacteria	p__proteobacteria	d__bacteria	TRUE	TRUE	0.00023	TRUE	1	GATCACCTCCTTTCA	GCACTGCTGAGGAGGCATCTTTAA	-9.72894
GCF_002005445.1	s__acetobacter aceti_b	g__acetobacter	f__acetobacteraceae	o__acetobacterales	c__alphaproteobacteria	p__proteobacteria	d__bacteria	TRUE	TRUE	0.00015	TRUE	1	GATCACCTCCTTTCA	GCGCTGCTGAGGAGGCATCTTTGA	-9.72894
GCF_008365315.1	s__acetobacter sp008365315	g__acetobacter	f__acetobacteraceae	o__acetobacterales	c__alphaproteobacteria	p__proteobacteria	d__bacteria	TRUE	TRUE	0.00023	TRUE	1	GATCACCTCCTTTCA	GCACTGCTGAGGAGGCATCTTTAA	-9.72894
GCF_000723785.2	s__acetobacter pasteurianus	g__acetobacter	f__acetobacteraceae	o__acetobacterales	c__alphaproteobacteria	p__proteobacteria	d__bacteria	TRUE	TRUE	0.00023	TRUE	1	GATCACCTCCTTTCA	GCACTGCTGAGGAGGCATCTTTAA	-9.72894
GCF_000193495.2	s__acetobacter aceti	g__acetobacter	f__acetobacteraceae	o__acetobacterales	c__alphaproteobacteria	p__proteobacteria	d__bacteria	TRUE	TRUE	0.00015	TRUE	1	GATCACCTCCTTTCA	GCGCTGCTGAGGAGGCATCTTTGA	-9.72894
GCF_001766235.1	s__acetobacter ascendens	g__acetobacter	f__acetobacteraceae	o__acetobacterales	c__alphaproteobacteria	p__proteobacteria	d__bacteria	TRUE	TRUE	0.00023	TRUE	1	GATCACCTCCTTTCA	GCACTGCTGAGGAGGCATCTTTAA	-9.72894
GCF_003352165.1	s__acidibrevibacterium fodinaquatile	g__acidibrevibacterium	f__acetobacteraceae	o__acetobacterales	c__alphaproteobacteria	p__proteobacteria	d__bacteria	TRUE	TRUE	6.6e-05	TRUE	1	GATCACCTCCTTTCA	GCGCTGCTGAGGAGGCATCTTTGA	-9.72894
GCF_000202835.1	s__acidiphilium multivorum	g__acidiphilium	f__acetobacteraceae	o__acetobacterales	c__alphaproteobacteria	p__proteobacteria	d__bacteria	TRUE	TRUE	0.00017	TRUE	1	GATCACCTCCTTTCA	GCCCTGCTGAGGAGGCATCTTTGA	-9.72894
GCF_000218565.1	s__afipia carboxidovorans	g__afipia	f__xanthobacteraceae	o__rhizobiales	c__alphaproteobacteria	p__proteobacteria	d__bacteria	TRUE	TRUE	9.7e-07	TRUE	1	GATCACCTCCTTTCT	GGGCTGCTGAGGAGGCATCTTTGA	-9.72894
GCF_000092025.1	s__agrobacterium fabrum	g__agrobacterium	f__rhizobiaceae	o__rhizobiales	c__alphaproteobacteria	p__proteobacteria	d__bacteria	TRUE	TRUE	3.3e-07	TRUE	1	GATCACCTCCTTTCT	AGCCTGCTGAGGAGGCATCTTTGA	-9.72894
GCF_005221325.1	s__agrobacterium sp900012625	g__agrobacterium	f__rhizobiaceae	o__rhizobiales	c__alphaproteobacteria	p__proteobacteria	d__bacteria	TRUE	TRUE	3.3e-07	TRUE	1	GATCACCTCCTTTCT	AGCCTGCTGAGGAGGCATCTTTGA	-9.72894
GCF_002943835.1	s__agrobacterium deltaense	g__agrobacterium	f__rhizobiaceae	o__rhizobiales	c__alphaproteobacteria	p__proteobacteria	d__bacteria	TRUE	TRUE	3.3e-07	TRUE	1	GATCACCTCCTTTCT	AGCCTGCTGAGGAGGCATCTTTGA	-9.72894
GCF_005221385.1	s__agrobacterium sp900013535	g__agrobacterium	f__rhizobiaceae	o__rhizobiales	c__alphaproteobacteria	p__proteobacteria	d__bacteria	TRUE	TRUE	3.3e-07	TRUE	1	GATCACCTCCTTTCT	AGCCTGCTGAGGAGGCATCTTTGA	-9.72894
GCF_005145045.1	s__agrobacterium larrymoorei	g__agrobacterium	f__rhizobiaceae	o__rhizobiales	c__alphaproteobacteria	p__proteobacteria	d__bacteria	TRUE	TRUE	3.3e-07	TRUE	1	GATCACCTCCTTTCT	AGCCTGCTGAGGAGGCATCTTTGA	-9.72894
GCF_017726655.1	s__agrobacterium tumefaciens_b	g__agrobacterium	f__rhizobiaceae	o__rhizobiales	c__alphaproteobacteria	p__proteobacteria	d__bacteria	TRUE	TRUE	3.3e-07	TRUE	1	GATCACCTCCTTTCT	AGCCTGCTGAGGAGGCATCTTTGA	-9.72894
GCF_010669145.1	s__agrobacterium oryzihabitans	g__agrobacterium	f__rhizobiaceae	o__rhizobiales	c__alphaproteobacteria	p__proteobacteria	d__bacteria	TRUE	TRUE	3.3e-07	TRUE	1	GATCACCTCCTTTCT	AGCCTGCTGAGGAGGCATCTTTGA	-9.72894
GCF_002600635.1	s__allorhizobium sp002600635	g__allorhizobium	f__rhizobiaceae	o__rhizobiales	c__alphaproteobacteria	p__proteobacteria	d__bacteria	TRUE	TRUE	5.3e-07	TRUE	1	GATCACCTCCTTTCT	AGCCTGCTGAGGAGGCATCTTTGA	-9.72894
GCF_016806065.1	s__allorhizobium sp001724035	g__allorhizobium	f__rhizobiaceae	o__rhizobiales	c__alphaproteobacteria	p__proteobacteria	d__bacteria	TRUE	TRUE	1.3e-07	TRUE	1	GATCACCTCCTTTCT	AGCCTGCTGAGGAGGCATCTTTGA	-9.72894
GCF_014126615.1	s__allorhizobium thiooxidans	g__allorhizobium	f__rhizobiaceae	o__rhizobiales	c__alphaproteobacteria	p__proteobacteria	d__bacteria	TRUE	TRUE	8e-07	TRUE	1	GATCACCTCCTTTCT	AGCCTGCTGAGGAGGCATCTTTGA	-9.72894
GCF_013426735.1	s__allorhizobium vitis_d	g__allorhizobium	f__rhizobiaceae	o__rhizobiales	c__alphaproteobacteria	p__proteobacteria	d__bacteria	TRUE	TRUE	1.3e-07	TRUE	1	GATCACCTCCTTTCT	AGCCTGCTGAGGAGGCATCTTTGA	-9.72894
GCF_001713475.1	s__allorhizobium sp001713475	g__allorhizobium	f__rhizobiaceae	o__rhizobiales	c__alphaproteobacteria	p__proteobacteria	d__bacteria	TRUE	TRUE	1.3e-07	TRUE	1	GATCACCTCCTTTCT	AGCCTGCTGAGGAGGCATCTTTGA	-9.72894
GCF_008033235.1	s__anseongella ginsenosidimutans	g__anseongella	f__sphingobacteriaceae	o__sphingobacteriales	c__bacteroidia	p__bacteroidota	d__bacteria	TRUE	TRUE	0.00012	TRUE	1	GAATACCTCCTTTCT	GCGTCCCTGAGGAGGCATCTTTGA	-9.72894
GCF_001547995.1	s__asaia bogorensis	g__asaia	f__acetobacteraceae	o__acetobacterales	c__alphaproteobacteria	p__proteobacteria	d__bacteria	TRUE	TRUE	0.00017	TRUE	1	GATCACCTCCTTTCA	GCACTGCTGAGGAGGCATCTTTGA	-9.72894
GCF_017815515.1	s__aureimonas populi	g__aureimonas	f__rhizobiaceae	o__rhizobiales	c__alphaproteobacteria	p__proteobacteria	d__bacteria	TRUE	TRUE	4.9e-06	TRUE	1	GATCACCTCCTTTCT	AGCCTGCTGAGGAGGCATCTTTGA	-9.72894
GCF_001442755.1	s__aureimonas sp001442755	g__aureimonas	f__rhizobiaceae	o__rhizobiales	c__alphaproteobacteria	p__proteobacteria	d__bacteria	TRUE	TRUE	4.5e-06	TRUE	1	GATCACCTCCTTTCT	AGCCTGCTGAGGAGGCATCTTTGA	-9.72894
GCF_014058705.1	s__aureimonas mangrovi	g__aureimonas	f__rhizobiaceae	o__rhizobiales	c__alphaproteobacteria	p__proteobacteria	d__bacteria	TRUE	TRUE	4.9e-06	TRUE	1	GATCACCTCCTTTCT	AGCCTGCTGAGGAGGCATCTTTGA	-9.72894
GCF_014844055.1	s__aureimonas altamirensis_a	g__aureimonas	f__rhizobiaceae	o__rhizobiales	c__alphaproteobacteria	p__proteobacteria	d__bacteria	TRUE	TRUE	2.9e-05	TRUE	1	GATCACCTCCTTTCT	AGCCTGCTGAGGAGGCATCTTTGA	-9.72894
GCF_003119115.1	s__azospirillum sp003119115	g__azospirillum	f__azospirillaceae	o__azospirillales	c__alphaproteobacteria	p__proteobacteria	d__bacteria	TRUE	TRUE	4.5e-06	TRUE	1	GATCACCTCCTTTCT	GCGCTGCTGAGGAGGCATCTTTGA	-9.72894
GCF_003233655.1	s__azospirillum ramasamyi	g__azospirillum	f__azospirillaceae	o__azospirillales	c__alphaproteobacteria	p__proteobacteria	d__bacteria	TRUE	TRUE	4.5e-06	TRUE	1	GATCACCTCCTTTCT	GCGCTGCTGAGGAGGCATCTTTGA	-9.72894
GCF_001305595.1	s__azospirillum thiophilum	g__azospirillum	f__azospirillaceae	o__azospirillales	c__alphaproteobacteria	p__proteobacteria	d__bacteria	TRUE	TRUE	4.5e-06	TRUE	1	GATCACCTCCTTTCT	GCGCTGCTGAGGAGGCATCTTTGA	-9.72894
GCF_003130795.1	s__azospirillum thermophilum	g__azospirillum	f__azospirillaceae	o__azospirillales	c__alphaproteobacteria	p__proteobacteria	d__bacteria	TRUE	TRUE	4.5e-06	TRUE	1	GATCACCTCCTTTCT	GCGCTGCTGAGGAGGCATCTTTGA	-9.72894
GCF_000283655.1	s__azospirillum lipoferum_c	g__azospirillum	f__azospirillaceae	o__azospirillales	c__alphaproteobacteria	p__proteobacteria	d__bacteria	TRUE	TRUE	4.5e-06	TRUE	1	GATCACCTCCTTTCT	GCGCTGCTGAGGAGGCATCTTTGA	-9.72894
GCF_001315015.1	s__azospirillum brasilense	g__azospirillum	f__azospirillaceae	o__azospirillales	c__alphaproteobacteria	p__proteobacteria	d__bacteria	TRUE	TRUE	4.5e-06	TRUE	1	GATCACCTCCTTTCT	GCGCTGCTGAGGAGGCATCTTTGA	-9.72894
GCF_004923295.1	s__azospirillum sp003115975	g__azospirillum	f__azospirillaceae	o__azospirillales	c__alphaproteobacteria	p__proteobacteria	d__bacteria	TRUE	TRUE	4.5e-06	TRUE	1	GATCACCTCCTTTCT	GCGCTGCTGAGGAGGCATCTTTGA	-9.72894
GCF_000010725.1	s__azospirillum lipoferum_b	g__azospirillum	f__azospirillaceae	o__azospirillales	c__alphaproteobacteria	p__proteobacteria	d__bacteria	TRUE	TRUE	4.5e-06	TRUE	1	GATCACCTCCTTTCT	GCGCTGCTGAGGAGGCATCTTTGA	-9.72894
GCF_004923315.1	s__azospirillum sp003116065	g__azospirillum	f__azospirillaceae	o__azospirillales	c__alphaproteobacteria	p__proteobacteria	d__bacteria	TRUE	TRUE	4.5e-06	TRUE	1	GATCACCTCCTTTCT	GCGCTGCTGAGGAGGCATCTTTGA	-9.72894
GCF_002007485.1	s__bartonella apis_a	g__bartonella	f__rhizobiaceae_a	o__rhizobiales_a	c__alphaproteobacteria	p__proteobacteria	d__bacteria	TRUE	TRUE	1e-06	TRUE	1	GATCACCTCCTTTCT	GGCTTGCTGAGGAGGCATCTTTGA	-9.72894
GCF_002007565.1	s__bartonella apis_b	g__bartonella	f__rhizobiaceae_a	o__rhizobiales_a	c__alphaproteobacteria	p__proteobacteria	d__bacteria	TRUE	TRUE	1e-06	TRUE	1	GATCACCTCCTTTCT	GGCCTGCTGAGGAGGCATCTTTGA	-9.72894
GCF_000019845.1	s__beijerinckia indica	g__beijerinckia	f__beijerinckiaceae	o__rhizobiales	c__alphaproteobacteria	p__proteobacteria	d__bacteria	TRUE	TRUE	1.9e-05	TRUE	1	GATCACCTCCTTTCT	GGATTGCTGAGGAGGCATCTTTGA	-9.72894
GCF_016864555.1	s__bg8 sp016864555	g__bg8	f__rhizobiaceae	o__rhizobiales	c__alphaproteobacteria	p__proteobacteria	d__bacteria	TRUE	TRUE	5.3e-07	TRUE	1	GATCACCTCCTTTCT	AGCCTGCTGAGGAGGCATCTTTGA	-9.72894
GCF_008253865.1	s__bosea sp008253865	g__bosea	f__beijerinckiaceae	o__rhizobiales	c__alphaproteobacteria	p__proteobacteria	d__bacteria	TRUE	TRUE	8.4e-07	TRUE	1	GATCACCTCCTTTCT	GGACTGCTGAGGAGGCATCTTTGA	-9.72894
GCF_011764485.1	s__bosea sp011764485	g__bosea	f__beijerinckiaceae	o__rhizobiales	c__alphaproteobacteria	p__proteobacteria	d__bacteria	TRUE	TRUE	8.4e-07	TRUE	1	GATCACCTCCTTTCT	GGACTGCTGAGGAGGCATCTTTGA	-9.72894
GCF_003952665.1	s__bosea sp003952665	g__bosea	f__beijerinckiaceae	o__rhizobiales	c__alphaproteobacteria	p__proteobacteria	d__bacteria	TRUE	TRUE	8.4e-07	TRUE	1	GATCACCTCCTTTCT	GGACTGCTGAGGAGGCATCTTTGA	-9.72894
GCF_001741865.1	s__bosea vaviloviae	g__bosea	f__beijerinckiaceae	o__rhizobiales	c__alphaproteobacteria	p__proteobacteria	d__bacteria	TRUE	TRUE	8.4e-07	TRUE	1	GATCACCTCCTTTCT	GGACTGCTGAGGAGGCATCTTTGA	-9.72894
GCF_002220095.1	s__bosea sp002220095	g__bosea	f__beijerinckiaceae	o__rhizobiales	c__alphaproteobacteria	p__proteobacteria	d__bacteria	TRUE	TRUE	8.4e-07	TRUE	1	GATCACCTCCTTTCT	GGACTGCTGAGGAGGCATCTTTGA	-9.72894
GCF_001562255.1	s__bosea sp001562255	g__bosea	f__beijerinckiaceae	o__rhizobiales	c__alphaproteobacteria	p__proteobacteria	d__bacteria	TRUE	TRUE	8.4e-07	TRUE	1	GATCACCTCCTTTCT	GGACTGCTGAGGAGGCATCTTTGA	-9.72894
GCF_001713455.1	s__bosea sp001713455	g__bosea	f__beijerinckiaceae	o__rhizobiales	c__alphaproteobacteria	p__proteobacteria	d__bacteria	TRUE	TRUE	8.4e-07	TRUE	1	GATCACCTCCTTTCT	GGACTGCTGAGGAGGCATCTTTGA	-9.72894
GCF_015624485.1	s__bradyrhizobium sp015624485	g__bradyrhizobium	f__xanthobacteraceae	o__rhizobiales	c__alphaproteobacteria	p__proteobacteria	d__bacteria	TRUE	TRUE	1.4e-06	TRUE	1	GATCACCTCCTTTCT	GGGCTGCTGAGGAGGCATCTTTGA	-9.72894
GCF_000296215.2	s__bradyrhizobium sp000296215	g__bradyrhizobium	f__xanthobacteraceae	o__rhizobiales	c__alphaproteobacteria	p__proteobacteria	d__bacteria	TRUE	TRUE	1.4e-06	TRUE	1	GATCACCTCCTTTCT	GGGCTGCTGAGGAGGCATCTTTGA	-9.72894
GCF_002831585.1	s__bradyrhizobium sp002831585	g__bradyrhizobium	f__xanthobacteraceae	o__rhizobiales	c__alphaproteobacteria	p__proteobacteria	d__bacteria	TRUE	TRUE	1.4e-06	TRUE	1	GATCACCTCCTTTCT	GGGCTGCTGAGGAGGCATCTTTGA	-9.72894
GCF_002266435.2	s__bradyrhizobium amphicarpaeae	g__bradyrhizobium	f__xanthobacteraceae	o__rhizobiales	c__alphaproteobacteria	p__proteobacteria	d__bacteria	TRUE	TRUE	1.4e-06	TRUE	1	GATCACCTCCTTTCT	GGGCTGCTGAGGAGGCATCTTTGA	-9.72894
GCF_015291745.1	s__bradyrhizobium sp015291745	g__bradyrhizobium	f__xanthobacteraceae	o__rhizobiales	c__alphaproteobacteria	p__proteobacteria	d__bacteria	TRUE	TRUE	1.4e-06	TRUE	1	GATCACCTCCTTTCT	GGGCTGCTGAGGAGGCATCTTTGA	-9.72894
GCF_016599855.1	s__bradyrhizobium diazoefficiens_d	g__bradyrhizobium	f__xanthobacteraceae	o__rhizobiales	c__alphaproteobacteria	p__proteobacteria	d__bacteria	TRUE	TRUE	1.4e-06	TRUE	1	GATCACCTCCTTTCT	GGGCTGCTGAGGAGGCATCTTTGA	-9.72894
GCF_016616235.1	s__bradyrhizobium diazoefficiens_h	g__bradyrhizobium	f__xanthobacteraceae	o__rhizobiales	c__alphaproteobacteria	p__proteobacteria	d__bacteria	TRUE	TRUE	1.4e-06	TRUE	1	GATCACCTCCTTTCT	GGGCTGCTGAGGAGGCATCTTTGA	-9.72894
GCF_008932115.1	s__bradyrhizobium betae	g__bradyrhizobium	f__xanthobacteraceae	o__rhizobiales	c__alphaproteobacteria	p__proteobacteria	d__bacteria	TRUE	TRUE	1.4e-06	TRUE	1	GATCACCTCCTTTCT	GGGCTGCTGAGGAGGCATCTTTGA	-9.72894
GCF_015291705.1	s__bradyrhizobium arachidis	g__bradyrhizobium	f__xanthobacteraceae	o__rhizobiales	c__alphaproteobacteria	p__proteobacteria	d__bacteria	TRUE	TRUE	1.4e-06	TRUE	1	GATCACCTCCTTTCT	GGGCTGCTGAGGAGGCATCTTTGA	-9.72894
GCF_016616885.1	s__bradyrhizobium diazoefficiens_f	g__bradyrhizobium	f__xanthobacteraceae	o__rhizobiales	c__alphaproteobacteria	p__proteobacteria	d__bacteria	TRUE	TRUE	1.4e-06	TRUE	1	GATCACCTCCTTTCT	GGGCTGCTGAGGAGGCATCTTTGA	-9.72894
GCF_004114935.1	s__bradyrhizobium zhanjiangense	g__bradyrhizobium	f__xanthobacteraceae	o__rhizobiales	c__alphaproteobacteria	p__proteobacteria	d__bacteria	TRUE	TRUE	1.4e-06	TRUE	1	GATCACCTCCTTTCT	GGGCTGCTGAGGAGGCATCTTTGA	-9.72894
GCF_001693385.1	s__bradyrhizobium icense	g__bradyrhizobium	f__xanthobacteraceae	o__rhizobiales	c__alphaproteobacteria	p__proteobacteria	d__bacteria	TRUE	TRUE	4.3e-06	TRUE	1	GATCACCTCCTTTCT	GGGCTGCTGAGGAGGCATCTTTGA	-9.72894
GCF_900176205.1	s__bradyrhizobium sp900176205	g__bradyrhizobium	f__xanthobacteraceae	o__rhizobiales	c__alphaproteobacteria	p__proteobacteria	d__bacteria	TRUE	TRUE	6.3e-06	TRUE	1	GATCACCTCCTTTCT	GGGCTGCTGAGGAGGCATCTTTGA	-9.72894
GCF_000026145.1	s__bradyrhizobium sp000026145	g__bradyrhizobium	f__xanthobacteraceae	o__rhizobiales	c__alphaproteobacteria	p__proteobacteria	d__bacteria	TRUE	TRUE	6.3e-06	TRUE	1	GATCACCTCCTTTCT	GGGCTGCTGAGGAGGCATCTTTGA	-9.72894
GCF_018736105.1	s__bradyrhizobium sp018736105	g__bradyrhizobium	f__xanthobacteraceae	o__rhizobiales	c__alphaproteobacteria	p__proteobacteria	d__bacteria	TRUE	TRUE	4.3e-06	TRUE	1	GATCACCTCCTTTCT	GGGCTGCTGAGGAGGCATCTTTGA	-9.72894
GCF_009930815.1	s__bradyrhizobium sp009930815	g__bradyrhizobium	f__xanthobacteraceae	o__rhizobiales	c__alphaproteobacteria	p__proteobacteria	d__bacteria	TRUE	TRUE	4.3e-06	TRUE	1	GATCACCTCCTTTCT	GGGCTGCTGAGGAGGCATCTTTGA	-9.72894
GCF_015291725.1	s__bradyrhizobium japonicum_d	g__bradyrhizobium	f__xanthobacteraceae	o__rhizobiales	c__alphaproteobacteria	p__proteobacteria	d__bacteria	TRUE	TRUE	1.4e-06	TRUE	1	GATCACCTCCTTTCT	GGGCTGCTGAGGAGGCATCTTTGA	-9.72894
GCF_001693515.2	s__bradyrhizobium paxllaeri	g__bradyrhizobium	f__xanthobacteraceae	o__rhizobiales	c__alphaproteobacteria	p__proteobacteria	d__bacteria	TRUE	TRUE	4.3e-06	TRUE	1	GATCACCTCCTTTCT	GGGCTGCTGAGGAGGCATCTTTGA	-9.72894
GCF_000284375.1	s__bradyrhizobium japonicum	g__bradyrhizobium	f__xanthobacteraceae	o__rhizobiales	c__alphaproteobacteria	p__proteobacteria	d__bacteria	TRUE	TRUE	1.4e-06	TRUE	1	GATCACCTCCTTTCT	GGGCTGCTGAGGAGGCATCTTTGA	-9.72894
GCF_004114915.1	s__bradyrhizobium guangxiense	g__bradyrhizobium	f__xanthobacteraceae	o__rhizobiales	c__alphaproteobacteria	p__proteobacteria	d__bacteria	TRUE	TRUE	1.4e-06	TRUE	1	GATCACCTCCTTTCT	GGGCTGCTGAGGAGGCATCTTTGA	-9.72894
GCF_005937885.2	s__bradyrhizobium sp005937885	g__bradyrhizobium	f__xanthobacteraceae	o__rhizobiales	c__alphaproteobacteria	p__proteobacteria	d__bacteria	TRUE	TRUE	2.3e-06	TRUE	1	GATCACCTCCTTTCT	GGGCTGCTGAGGAGGCATCTTTGA	-9.72894
GCF_015291625.1	s__bradyrhizobium sp015291625	g__bradyrhizobium	f__xanthobacteraceae	o__rhizobiales	c__alphaproteobacteria	p__proteobacteria	d__bacteria	TRUE	TRUE	1.4e-06	TRUE	1	GATCACCTCCTTTCT	GGGCTGCTGAGGAGGCATCTTTGA	-9.72894
GCF_016616425.1	s__bradyrhizobium diazoefficiens_e	g__bradyrhizobium	f__xanthobacteraceae	o__rhizobiales	c__alphaproteobacteria	p__proteobacteria	d__bacteria	TRUE	TRUE	1.4e-06	TRUE	1	GATCACCTCCTTTCT	GGGCTGCTGAGGAGGCATCTTTGA	-9.72894
GCF_004114955.1	s__bradyrhizobium guangzhouense	g__bradyrhizobium	f__xanthobacteraceae	o__rhizobiales	c__alphaproteobacteria	p__proteobacteria	d__bacteria	TRUE	TRUE	1.4e-06	TRUE	1	GATCACCTCCTTTCT	GGGCTGCTGAGGAGGCATCTTTGA	-9.72894
GCF_015291645.1	s__bradyrhizobium sp015291645	g__bradyrhizobium	f__xanthobacteraceae	o__rhizobiales	c__alphaproteobacteria	p__proteobacteria	d__bacteria	TRUE	TRUE	1.4e-06	TRUE	1	GATCACCTCCTTTCT	GGGCTGCTGAGGAGGCATCTTTGA	-9.72894
GCF_011602485.1	s__bradyrhizobium sp011602485	g__bradyrhizobium	f__xanthobacteraceae	o__rhizobiales	c__alphaproteobacteria	p__proteobacteria	d__bacteria	TRUE	TRUE	1.4e-06	TRUE	1	GATCACCTCCTTTCT	GGGCTGCTGAGGAGGCATCTTTGA	-9.72894
GCF_015291665.1	s__bradyrhizobium sp015291665	g__bradyrhizobium	f__xanthobacteraceae	o__rhizobiales	c__alphaproteobacteria	p__proteobacteria	d__bacteria	TRUE	TRUE	1.4e-06	TRUE	1	GATCACCTCCTTTCT	GGGCTGCTGAGGAGGCATCTTTGA	-9.72894
GCF_000011365.1	s__bradyrhizobium diazoefficiens	g__bradyrhizobium	f__xanthobacteraceae	o__rhizobiales	c__alphaproteobacteria	p__proteobacteria	d__bacteria	TRUE	TRUE	1.4e-06	TRUE	1	GATCACCTCCTTTCT	GGGCTGCTGAGGAGGCATCTTTGA	-9.72894
GCF_002278135.2	s__bradyrhizobium ottawaense	g__bradyrhizobium	f__xanthobacteraceae	o__rhizobiales	c__alphaproteobacteria	p__proteobacteria	d__bacteria	TRUE	TRUE	1.4e-06	TRUE	1	GATCACCTCCTTTCT	GGGCTGCTGAGGAGGCATCTTTGA	-9.72894
GCF_000344805.1	s__bradyrhizobium oligotrophicum	g__bradyrhizobium	f__xanthobacteraceae	o__rhizobiales	c__alphaproteobacteria	p__proteobacteria	d__bacteria	TRUE	TRUE	6.3e-06	TRUE	1	GATCACCTCCTTTCT	GGGCTGCTGAGGAGGCATCTTTGA	-9.72894
GCF_015624505.1	s__bradyrhizobium sp015624505	g__bradyrhizobium	f__xanthobacteraceae	o__rhizobiales	c__alphaproteobacteria	p__proteobacteria	d__bacteria	TRUE	TRUE	1.4e-06	TRUE	1	GATCACCTCCTTTCT	GGGCTGCTGAGGAGGCATCTTTGA	-9.72894
GCF_000015165.1	s__bradyrhizobium denitrificans	g__bradyrhizobium	f__xanthobacteraceae	o__rhizobiales	c__alphaproteobacteria	p__proteobacteria	d__bacteria	TRUE	TRUE	6.3e-06	TRUE	1	GATCACCTCCTTTCT	GGGCTGCTGAGGAGGCATCTTTGA	-9.72894
GCF_007290395.1	s__bradyrhizobium cosmicum	g__bradyrhizobium	f__xanthobacteraceae	o__rhizobiales	c__alphaproteobacteria	p__proteobacteria	d__bacteria	TRUE	TRUE	1.4e-06	TRUE	1	GATCACCTCCTTTCT	GGGCTGCTGAGGAGGCATCTTTGA	-9.72894
GCF_004114975.1	s__bradyrhizobium guangdongense	g__bradyrhizobium	f__xanthobacteraceae	o__rhizobiales	c__alphaproteobacteria	p__proteobacteria	d__bacteria	TRUE	TRUE	1.4e-06	TRUE	1	GATCACCTCCTTTCT	GGGCTGCTGAGGAGGCATCTTTGA	-9.72894
GCF_002266465.2	s__bradyrhizobium symbiodeficiens	g__bradyrhizobium	f__xanthobacteraceae	o__rhizobiales	c__alphaproteobacteria	p__proteobacteria	d__bacteria	TRUE	TRUE	1.4e-06	TRUE	1	GATCACCTCCTTTCT	GGGCTGCTGAGGAGGCATCTTTGA	-9.72894
GCF_003432385.1	s__breoghania sp003432385	g__breoghania	f__stappiaceae	o__rhizobiales	c__alphaproteobacteria	p__proteobacteria	d__bacteria	TRUE	TRUE	3.4e-06	TRUE	1	GATCACCTCCTTTCT	GCCCTGCTGAGGAGGCATCTTTGA	-9.72894
GCF_000007125.1	s__brucella melitensis	g__brucella	f__rhizobiaceae_a	o__rhizobiales_a	c__alphaproteobacteria	p__proteobacteria	d__bacteria	TRUE	TRUE	1.3e-06	TRUE	1	GATCACCTCCTTTCT	AGCCTGCTGAGGAGGCATCTTTGA	-9.72894
GCF_003691365.1	s__commensalibacter sp003202795	g__commensalibacter	f__acetobacteraceae	o__acetobacterales	c__alphaproteobacteria	p__proteobacteria	d__bacteria	TRUE	TRUE	0.0026	TRUE	1	GATCACCTCCTTTCA	GAACTGCTGAGGAGGCATCTTTGA	-9.72894
GCF_014127105.1	s__devosia sp014127105	g__devosia	f__devosiaceae	o__rhizobiales	c__alphaproteobacteria	p__proteobacteria	d__bacteria	TRUE	TRUE	2.2e-05	TRUE	1	GATCACCTCCTTTCT	AGCCTGCTGAGGAGGCATCTTTGA	-9.72894
GCF_007859655.1	s__devosia ginsengisoli	g__devosia	f__devosiaceae	o__rhizobiales	c__alphaproteobacteria	p__proteobacteria	d__bacteria	TRUE	TRUE	5.3e-05	TRUE	1	GATCACCTCCTTTCT	ACCCTGCTGAGGAGGCATCTTTGA	-9.72894
GCF_004005995.1	s__devosia sp004005995	g__devosia	f__devosiaceae	o__rhizobiales	c__alphaproteobacteria	p__proteobacteria	d__bacteria	TRUE	TRUE	5.4e-05	TRUE	1	GATCACCTCCTTTCT	GGCCTGCTGAGGAGGCATCTTTGA	-9.72894
GCF_014926585.1	s__devosia sp014926585	g__devosia	f__devosiaceae	o__rhizobiales	c__alphaproteobacteria	p__proteobacteria	d__bacteria	TRUE	TRUE	0.00047	TRUE	1	GATCACCTCCTTTCT	ACCCTGCTGAGGAGGCATCTTTGA	-9.72894
GCF_001402915.1	s__devosia_a sp001402915	g__devosia_a	f__devosiaceae	o__rhizobiales	c__alphaproteobacteria	p__proteobacteria	d__bacteria	TRUE	TRUE	5.5e-05	TRUE	1	GATCACCTCCTTTCT	AGCCTGCTGAGGAGGCATCTTTGA	-9.72894
GCF_009762775.1	s__draconibacterium comscasis	g__draconibacterium	f__prolixibacteraceae	o__bacteroidales	c__bacteroidia	p__bacteroidota	d__bacteria	TRUE	TRUE	0.00014	TRUE	1	GAACACCTCCTTTCT	GATGCGCTGAGGAGGCATCTTTGA	-9.72894
GCF_000626635.1	s__draconibacterium orientale	g__draconibacterium	f__prolixibacteraceae	o__bacteroidales	c__bacteroidia	p__bacteroidota	d__bacteria	TRUE	TRUE	5.9e-05	TRUE	1	GAACACCTCCTTTCT	GACGCGCTGAGGAGGCATCTTTGA	-9.72894
GCF_010448835.1	s__draconibacterium halophilum	g__draconibacterium	f__prolixibacteraceae	o__bacteroidales	c__bacteroidia	p__bacteroidota	d__bacteria	TRUE	TRUE	0.00021	TRUE	1	GAACACCTCCTTTCT	GATGCGCTGAGGAGGCATCTTTGA	-9.72894
GCF_016756615.1	s__dusc01 sp016756615	g__dusc01	f__rhizobiaceae	o__rhizobiales	c__alphaproteobacteria	p__proteobacteria	d__bacteria	TRUE	TRUE	7.2e-05	TRUE	1	GATCACCTCCTTTCT	AGCTTGCTGAGGAGGCATCTTTGA	-9.72894
GCF_019203965.1	s__elioraea_a sp019203965	g__elioraea_a	f__acetobacteraceae	o__acetobacterales	c__alphaproteobacteria	p__proteobacteria	d__bacteria	TRUE	TRUE	0.00019	TRUE	1	GATCACCTCCTTTCA	GGTCTGCTGAGGAGGCATCTTTGA	-9.72894
GCF_000319385.1	s__endolissoclinum faulkneri	g__endolissoclinum	f__thalassobaculaceae	o__thalassobaculales	c__alphaproteobacteria	p__proteobacteria	d__bacteria	TRUE	TRUE	0.0052	TRUE	1	GATCACCTCCTTTCT	AAGCTGCTGAGGAGGCATGTTTGA	-9.72894
GCF_016919405.1	s__ensifer sp000799055	g__ensifer	f__rhizobiaceae	o__rhizobiales	c__alphaproteobacteria	p__proteobacteria	d__bacteria	TRUE	TRUE	7.5e-07	TRUE	1	GATCACCTCCTTTCT	AGCCTGCTGAGGAGGCATCTTTGA	-9.72894
GCF_000697965.2	s__ensifer adhaerens	g__ensifer	f__rhizobiaceae	o__rhizobiales	c__alphaproteobacteria	p__proteobacteria	d__bacteria	TRUE	TRUE	7.5e-07	TRUE	1	GATCACCTCCTTTCT	AGCCTGCTGAGGAGGCATCTTTGA	-9.72894
GCF_014672835.1	s__entomobacter blattae	g__entomobacter	f__acetobacteraceae	o__acetobacterales	c__alphaproteobacteria	p__proteobacteria	d__bacteria	TRUE	TRUE	0.0016	TRUE	1	GATCACCTCCTTTCA	GCACTGCTGAGGAGGCATCTTTGA	-9.72894
GCA_014191545.1	s__ga0077545 sp014191545	g__ga0077545	f__methylopilaceae	o__rhizobiales	c__alphaproteobacteria	p__proteobacteria	d__bacteria	TRUE	TRUE	4.5e-07	TRUE	1	GATCACCTCCTTTCT	GGGCTGCTGAGGAGGCATCTTTGA	-9.72894
GCF_003952725.1	s__georhizobium profundi	g__georhizobium	f__rhizobiaceae	o__rhizobiales	c__alphaproteobacteria	p__proteobacteria	d__bacteria	TRUE	TRUE	4.7e-05	TRUE	1	GATCACCTCCTTTCT	GCCCTGCTGAGGAGGCATCTTTGA	-9.72894
GCF_000021325.1	s__gluconacetobacter diazotrophicus	g__gluconacetobacter	f__acetobacteraceae	o__acetobacterales	c__alphaproteobacteria	p__proteobacteria	d__bacteria	TRUE	TRUE	0.00032	TRUE	1	GATCACCTCCTTTCA	GCGCTGCTGAGGAGGCATCTTTGA	-9.72894
GCF_004000605.1	s__glycocaulis alkaliphilus	g__glycocaulis	f__maricaulaceae	o__caulobacterales	c__alphaproteobacteria	p__proteobacteria	d__bacteria	TRUE	TRUE	0.0082	TRUE	1	GATCACCTCCTTTCT	GAACTGCTGAGGAGGCGTCTTTGA	-9.72894
GCF_001889545.1	s__granulibacter bethesdensis_b	g__granulibacter	f__acetobacteraceae	o__acetobacterales	c__alphaproteobacteria	p__proteobacteria	d__bacteria	TRUE	TRUE	9.3e-05	TRUE	1	GATCACCTCCTTTCA	GCACTGCTGAGGAGGCATCTTTGA	-9.72894
GCF_000014285.2	s__granulibacter bethesdensis	g__granulibacter	f__acetobacteraceae	o__acetobacterales	c__alphaproteobacteria	p__proteobacteria	d__bacteria	TRUE	TRUE	9.3e-05	TRUE	1	GATCACCTCCTTTCA	GCACTGCTGAGGAGGCATCTTTGA	-9.72894
GCF_001611975.1	s__haematospirillum jordaniae	g__haematospirillum	f__rhodospirillaceae	o__rhodospirillales	c__alphaproteobacteria	p__proteobacteria	d__bacteria	TRUE	TRUE	0.00041	TRUE	1	GATCACCTCCTTTCA	GCCCTGCTGAGGAGGCATCTTTGA	-9.72894
GCF_900231165.1	s__hartmannibacter diazotrophicus	g__hartmannibacter	f__pleomorphomonadaceae	o__rhizobiales	c__alphaproteobacteria	p__proteobacteria	d__bacteria	TRUE	TRUE	2.1e-05	TRUE	1	GATCACCTCCTTTCT	GCCCTGCTGAGGAGGCATCTTTGA	-9.72894
GCF_001854405.1	s__henriciella sp001854405	g__henriciella	f__hyphomonadaceae	o__caulobacterales	c__alphaproteobacteria	p__proteobacteria	d__bacteria	TRUE	TRUE	8.7e-05	TRUE	1	GATCACCTCCTTTCT	GAACTGCTGAGGAGGCGTCTTTGA	-9.72894
GCF_000023785.1	s__hirschia baltica	g__hirschia	f__hyphomonadaceae	o__caulobacterales	c__alphaproteobacteria	p__proteobacteria	d__bacteria	TRUE	TRUE	0.00041	TRUE	1	GATCACCTCCTTTCT	GAACTGCTGAGGAGGCGTCTTTGA	-9.72894
GCF_001011155.1	s__hoeflea sp001011155	g__hoeflea	f__rhizobiaceae	o__rhizobiales	c__alphaproteobacteria	p__proteobacteria	d__bacteria	TRUE	TRUE	7.2e-05	TRUE	1	GATCACCTCCTTTCT	AGCCTGCTGAGGAGGCATCTTTGA	-9.72894
GCF_014117425.1	s__hy038 sp014117425	g__hy038	f__rhizobiaceae_a	o__rhizobiales_a	c__alphaproteobacteria	p__proteobacteria	d__bacteria	TRUE	TRUE	7.6e-07	TRUE	1	GATCACCTCCTTTCT	AGTCTGCTGAGGAGGCATCTTTGA	-9.72894
GCF_008728855.1	s__hypericibacter terrae	g__hypericibacter	f__dongiaceae	o__dongiales	c__alphaproteobacteria	p__proteobacteria	d__bacteria	TRUE	TRUE	2e-05	TRUE	1	GATCACCTCCTTTCT	GCCCTGCTGAGGAGGCATCTTTGA	-9.72894
GCF_008728835.1	s__hypericibacter adhaerens	g__hypericibacter	f__dongiaceae	o__dongiales	c__alphaproteobacteria	p__proteobacteria	d__bacteria	TRUE	TRUE	1.1e-06	TRUE	1	GATCACCTCCTTTCT	GCATTGCTGAGGAGGCATCTTTGA	-9.72894
GCF_014323565.1	s__hyphobacterium sp014323565	g__hyphobacterium	f__maricaulaceae	o__caulobacterales	c__alphaproteobacteria	p__proteobacteria	d__bacteria	TRUE	TRUE	0.00075	TRUE	1	GATCACCTCCTTTCT	GGACTGCTGAGGAGGCGTCTTTGA	-9.72894
GCF_003568845.1	s__indioceanicola profundi	g__indioceanicola	f__azospirillaceae	o__azospirillales	c__alphaproteobacteria	p__proteobacteria	d__bacteria	TRUE	TRUE	3.6e-05	TRUE	1	GATCACCTCCTTTCT	GCGCTGCTGAGGAGGCATCTTTGA	-9.72894
GCF_009906835.1	s__kacc-21507 sp009906835	g__kacc-21507	f__acetobacteraceae	o__acetobacterales	c__alphaproteobacteria	p__proteobacteria	d__bacteria	TRUE	TRUE	0.00028	TRUE	1	GATCACCTCCTTTCA	GCACTGCTGAGGAGGCATCTTTGA	-9.72894
GCF_016629525.1	s__kaistia sp016629525	g__kaistia	f__kaistiaceae	o__rhizobiales	c__alphaproteobacteria	p__proteobacteria	d__bacteria	TRUE	TRUE	7.4e-06	TRUE	1	GATCACCTCCTTTCT	ACCCTGCTGAGGAGGCATCTTTGA	-9.72894
GCF_015482775.1	s__kaustia mangrovi	g__kaustia	f__im1	o__rhizobiales	c__alphaproteobacteria	p__proteobacteria	d__bacteria	TRUE	TRUE	9.8e-07	TRUE	1	GATCACCTCCTTTCT	GGACTGCTGAGGAGGCATCTTTGA	-9.72894
GCF_009834365.1	s__komagataeibacter xylinus_d	g__komagataeibacter	f__acetobacteraceae	o__acetobacterales	c__alphaproteobacteria	p__proteobacteria	d__bacteria	TRUE	TRUE	0.00023	TRUE	1	GATCACCTCCTTTCA	GCGCTGCTGAGGAGGCATCTTTGA	-9.72894
GCF_000182745.2	s__komagataeibacter medellinensis	g__komagataeibacter	f__acetobacteraceae	o__acetobacterales	c__alphaproteobacteria	p__proteobacteria	d__bacteria	TRUE	TRUE	0.00023	TRUE	1	GATCACCTCCTTTCA	GCACTGCTGAGGAGGCATCTTTGA	-9.72894
GCF_015240255.1	s__kordiimonas pumila	g__kordiimonas	f__kordiimonadaceae	o__sphingomonadales	c__alphaproteobacteria	p__proteobacteria	d__bacteria	TRUE	TRUE	0.00035	TRUE	1	GATCACCTCCTTTCT	GCACTGCTGAGGAGGCATCTTTGA	-9.72894
GCF_001787335.1	s__kozakia baliensis	g__kozakia	f__acetobacteraceae	o__acetobacterales	c__alphaproteobacteria	p__proteobacteria	d__bacteria	TRUE	TRUE	0.00017	TRUE	1	GATCACCTCCTTTCA	GCGCTGCTGAGGAGGCATCTTTGA	-9.72894
GCF_008330945.1	s__labrys sp008330945	g__labrys	f__labraceae	o__rhizobiales	c__alphaproteobacteria	p__proteobacteria	d__bacteria	TRUE	TRUE	2.1e-05	TRUE	1	GATCACCTCCTTTCT	GGACTGCTGAGGAGGCATCTTTGA	-9.72894
GCF_013201075.1	s__lichenicola cladoniae	g__lichenicola	f__acetobacteraceae	o__acetobacterales	c__alphaproteobacteria	p__proteobacteria	d__bacteria	TRUE	TRUE	2.9e-05	TRUE	1	GATCACCTCCTTTCA	GCGCTGCTGAGGAGGCATCTTTGA	-9.72894
GCF_004323635.1	s__lichenihabitans psoromatis	g__lichenihabitans	f__beijerinckiaceae	o__rhizobiales	c__alphaproteobacteria	p__proteobacteria	d__bacteria	TRUE	TRUE	1.4e-05	TRUE	1	GATCACCTCCTTTCT	GGGCTGCTGAGGAGGCATCTTTGA	-9.72894
GCF_005849285.1	s__luteithermobacter gelatinilyticus	g__luteithermobacter	f__emcibacteraceae	o__sphingomonadales	c__alphaproteobacteria	p__proteobacteria	d__bacteria	TRUE	TRUE	0.00011	TRUE	1	GATCACCTCCTTTCT	GCACTGCTGAGGAGGCATCTTTGA	-9.72894
GCF_000968135.1	s__magnetospira sp000968135	g__magnetospira	f__magnetospiraceae	o__rhodospirillales	c__alphaproteobacteria	p__proteobacteria	d__bacteria	TRUE	TRUE	3.1e-06	TRUE	1	GATCACCTCCTTTCA	GAACTGCTGAGGAGGCATCTTTGA	-9.72894
GCF_000014745.1	s__maricaulis maris_a	g__maricaulis	f__maricaulaceae	o__caulobacterales	c__alphaproteobacteria	p__proteobacteria	d__bacteria	TRUE	TRUE	8.7e-05	TRUE	1	GATCACCTCCTTTCT	GGCCTGCTGAGGAGGCGTCTTTGA	-9.72894
GCF_000960975.1	s__martelella endophytica	g__martelella	f__rhizobiaceae	o__rhizobiales	c__alphaproteobacteria	p__proteobacteria	d__bacteria	TRUE	TRUE	9.6e-05	TRUE	1	GATCACCTCCTTTCT	ACCCTGCTGAGGAGGCATCTTTGA	-9.72894
GCF_002043005.1	s__martelella mediterranea	g__martelella	f__rhizobiaceae	o__rhizobiales	c__alphaproteobacteria	p__proteobacteria	d__bacteria	TRUE	TRUE	9.1e-05	TRUE	1	GATCACCTCCTTTCT	GGCCTGCTGAGGAGGCATCTTTGA	-9.72894
GCF_001578105.1	s__martelella sp001578105	g__martelella	f__rhizobiaceae	o__rhizobiales	c__alphaproteobacteria	p__proteobacteria	d__bacteria	TRUE	TRUE	1.5e-05	TRUE	1	GATCACCTCCTTTCT	ACCCTGCTGAGGAGGCATCTTTGA	-9.72894
GCF_013459645.1	s__martelella sp013459645	g__martelella	f__rhizobiaceae	o__rhizobiales	c__alphaproteobacteria	p__proteobacteria	d__bacteria	TRUE	TRUE	9.1e-05	TRUE	1	GATCACCTCCTTTCT	GGCCTGCTGAGGAGGCATCTTTGA	-9.72894
GCF_003952485.1	s__mesorhizobium sp003952485	g__mesorhizobium	f__rhizobiaceae	o__rhizobiales	c__alphaproteobacteria	p__proteobacteria	d__bacteria	TRUE	TRUE	5.6e-06	TRUE	1	GATCACCTCCTTTCT	ACCCTGCTGAGGAGGCATCTTTGA	-9.72894
GCF_003952465.1	s__mesorhizobium sp003952465	g__mesorhizobium	f__rhizobiaceae	o__rhizobiales	c__alphaproteobacteria	p__proteobacteria	d__bacteria	TRUE	TRUE	5.6e-06	TRUE	1	GATCACCTCCTTTCT	ACCCTGCTGAGGAGGCATCTTTGA	-9.72894
GCF_015500075.1	s__mesorhizobium sp015500075	g__mesorhizobium	f__rhizobiaceae	o__rhizobiales	c__alphaproteobacteria	p__proteobacteria	d__bacteria	TRUE	TRUE	1.4e-06	TRUE	1	GATCACCTCCTTTCT	ACCCTGCTGAGGAGGCATCTTTGA	-9.72894
GCF_016756595.1	s__mesorhizobium sp004020105	g__mesorhizobium	f__rhizobiaceae	o__rhizobiales	c__alphaproteobacteria	p__proteobacteria	d__bacteria	TRUE	TRUE	1.4e-06	TRUE	1	GATCACCTCCTTTCT	ACCCTGCTGAGGAGGCATCTTTGA	-9.72894
GCF_004136315.1	s__mesorhizobium sp004136315	g__mesorhizobium	f__rhizobiaceae	o__rhizobiales	c__alphaproteobacteria	p__proteobacteria	d__bacteria	TRUE	TRUE	1.4e-06	TRUE	1	GATCACCTCCTTTCT	ACCCTGCTGAGGAGGCATCTTTGA	-9.72894
GCF_000009625.1	s__mesorhizobium japonicum	g__mesorhizobium	f__rhizobiaceae	o__rhizobiales	c__alphaproteobacteria	p__proteobacteria	d__bacteria	TRUE	TRUE	1.4e-06	TRUE	1	GATCACCTCCTTTCT	ACCCTGCTGAGGAGGCATCTTTGA	-9.72894
GCF_000176035.2	s__mesorhizobium opportunistum	g__mesorhizobium	f__rhizobiaceae	o__rhizobiales	c__alphaproteobacteria	p__proteobacteria	d__bacteria	TRUE	TRUE	1.4e-06	TRUE	1	GATCACCTCCTTTCT	ACCCTGCTGAGGAGGCATCTTTGA	-9.72894
GCF_003952365.1	s__mesorhizobium sp003952365	g__mesorhizobium	f__rhizobiaceae	o__rhizobiales	c__alphaproteobacteria	p__proteobacteria	d__bacteria	TRUE	TRUE	1.4e-06	TRUE	1	GATCACCTCCTTTCT	ACCCTGCTGAGGAGGCATCTTTGA	-9.72894
GCF_008727715.1	s__mesorhizobium terrae	g__mesorhizobium	f__rhizobiaceae	o__rhizobiales	c__alphaproteobacteria	p__proteobacteria	d__bacteria	TRUE	TRUE	2.6e-06	TRUE	1	GATCACCTCCTTTCT	AGCCTGCTGAGGAGGCATCTTTGA	-9.72894
GCF_003952425.1	s__mesorhizobium sp003952425	g__mesorhizobium	f__rhizobiaceae	o__rhizobiales	c__alphaproteobacteria	p__proteobacteria	d__bacteria	TRUE	TRUE	5.6e-06	TRUE	1	GATCACCTCCTTTCT	ACCCTGCTGAGGAGGCATCTTTGA	-9.72894
GCF_003952385.1	s__mesorhizobium sp003952385	g__mesorhizobium	f__rhizobiaceae	o__rhizobiales	c__alphaproteobacteria	p__proteobacteria	d__bacteria	TRUE	TRUE	5.6e-06	TRUE	1	GATCACCTCCTTTCT	ACCCTGCTGAGGAGGCATCTTTGA	-9.72894
GCF_000185905.1	s__mesorhizobium ciceri	g__mesorhizobium	f__rhizobiaceae	o__rhizobiales	c__alphaproteobacteria	p__proteobacteria	d__bacteria	TRUE	TRUE	1.4e-06	TRUE	1	GATCACCTCCTTTCT	ACCCTGCTGAGGAGGCATCTTTGA	-9.72894
GCF_013170805.1	s__mesorhizobium sp013170805	g__mesorhizobium	f__rhizobiaceae	o__rhizobiales	c__alphaproteobacteria	p__proteobacteria	d__bacteria	TRUE	TRUE	1.4e-06	TRUE	1	GATCACCTCCTTTCT	ACCCTGCTGAGGAGGCATCTTTGA	-9.72894
GCF_016756535.1	s__mesorhizobium sp016756535	g__mesorhizobium	f__rhizobiaceae	o__rhizobiales	c__alphaproteobacteria	p__proteobacteria	d__bacteria	TRUE	TRUE	1.4e-06	TRUE	1	GATCACCTCCTTTCT	ACCCTGCTGAGGAGGCATCTTTGA	-9.72894
GCF_000230995.2	s__mesorhizobium australicum	g__mesorhizobium	f__rhizobiaceae	o__rhizobiales	c__alphaproteobacteria	p__proteobacteria	d__bacteria	TRUE	TRUE	1.4e-06	TRUE	1	GATCACCTCCTTTCT	ACCCTGCTGAGGAGGCATCTTTGA	-9.72894
GCF_016591715.1	s__mesorhizobium sp016591715	g__mesorhizobium	f__rhizobiaceae	o__rhizobiales	c__alphaproteobacteria	p__proteobacteria	d__bacteria	TRUE	TRUE	1.4e-06	TRUE	1	GATCACCTCCTTTCT	ACCCTGCTGAGGAGGCATCTTTGA	-9.72894
GCF_003952525.1	s__mesorhizobium sp002294945	g__mesorhizobium	f__rhizobiaceae	o__rhizobiales	c__alphaproteobacteria	p__proteobacteria	d__bacteria	TRUE	TRUE	1.4e-06	TRUE	1	GATCACCTCCTTTCT	ACCCTGCTGAGGAGGCATCTTTGA	-9.72894
GCF_014189455.1	s__mesorhizobium huakuii_a	g__mesorhizobium	f__rhizobiaceae	o__rhizobiales	c__alphaproteobacteria	p__proteobacteria	d__bacteria	TRUE	TRUE	1.4e-06	TRUE	1	GATCACCTCCTTTCT	ACCCTGCTGAGGAGGCATCTTTGA	-9.72894
GCF_013170705.1	s__mesorhizobium loti_d	g__mesorhizobium	f__rhizobiaceae	o__rhizobiales	c__alphaproteobacteria	p__proteobacteria	d__bacteria	TRUE	TRUE	1.4e-06	TRUE	1	GATCACCTCCTTTCT	ACCCTGCTGAGGAGGCATCTTTGA	-9.72894
GCF_013170825.1	s__mesorhizobium sp013170825	g__mesorhizobium	f__rhizobiaceae	o__rhizobiales	c__alphaproteobacteria	p__proteobacteria	d__bacteria	TRUE	TRUE	1.4e-06	TRUE	1	GATCACCTCCTTTCT	ACCCTGCTGAGGAGGCATCTTTGA	-9.72894
GCF_013170845.1	s__mesorhizobium loti_b	g__mesorhizobium	f__rhizobiaceae	o__rhizobiales	c__alphaproteobacteria	p__proteobacteria	d__bacteria	TRUE	TRUE	1.4e-06	TRUE	1	GATCACCTCCTTTCT	ACCCTGCTGAGGAGGCATCTTTGA	-9.72894
GCF_016756495.1	s__mesorhizobium sp016756495	g__mesorhizobium	f__rhizobiaceae	o__rhizobiales	c__alphaproteobacteria	p__proteobacteria	d__bacteria	TRUE	TRUE	1.4e-06	TRUE	1	GATCACCTCCTTTCT	ACCCTGCTGAGGAGGCATCTTTGA	-9.72894
GCF_001686985.1	s__mesorhizobium amorphae_b	g__mesorhizobium	f__rhizobiaceae	o__rhizobiales	c__alphaproteobacteria	p__proteobacteria	d__bacteria	TRUE	TRUE	1.4e-06	TRUE	1	GATCACCTCCTTTCT	ACCCTGCTGAGGAGGCATCTTTGA	-9.72894
GCF_001889605.1	s__mesorhizobium_e oceanicum	g__mesorhizobium_e	f__rhizobiaceae	o__rhizobiales	c__alphaproteobacteria	p__proteobacteria	d__bacteria	TRUE	TRUE	0.00018	TRUE	1	GATCACCTCCTTTCT	GGCCTGCTGAGGAGGCATCTTTGA	-9.72894
GCF_014495845.1	s__mesorhizobium_e sp014495845	g__mesorhizobium_e	f__rhizobiaceae	o__rhizobiales	c__alphaproteobacteria	p__proteobacteria	d__bacteria	TRUE	TRUE	1.3e-05	TRUE	1	GATCACCTCCTTTCT	GGCCTGCTGAGGAGGCATCTTTGA	-9.72894
GCF_015500055.1	s__mesorhizobium_f sp015500055	g__mesorhizobium_f	f__rhizobiaceae	o__rhizobiales	c__alphaproteobacteria	p__proteobacteria	d__bacteria	TRUE	TRUE	2.8e-06	TRUE	1	GATCACCTCCTTTCT	ACCCTGCTGAGGAGGCATCTTTGA	-9.72894
GCF_003173735.1	s__methylobacterium radiodurans	g__methylobacterium	f__beijerinckiaceae	o__rhizobiales	c__alphaproteobacteria	p__proteobacteria	d__bacteria	TRUE	TRUE	7e-05	TRUE	1	GATCACCTCCTTTCT	GGGCTGCTGAGGAGGCATCTTTGA	-9.72894
GCF_008000895.1	s__methylobacterium sp008000895	g__methylobacterium	f__beijerinckiaceae	o__rhizobiales	c__alphaproteobacteria	p__proteobacteria	d__bacteria	TRUE	TRUE	7e-05	TRUE	1	GATCACCTCCTTTCT	GGGCTGCTGAGGAGGCATCTTTGA	-9.72894
GCF_002355515.1	s__methylobacterium populi_a	g__methylobacterium	f__beijerinckiaceae	o__rhizobiales	c__alphaproteobacteria	p__proteobacteria	d__bacteria	TRUE	TRUE	7e-05	TRUE	1	GATCACCTCCTTTCT	GGGCTGCTGAGGAGGCATCTTTGA	-9.72894
GCF_003173755.1	s__methylobacterium terrae	g__methylobacterium	f__beijerinckiaceae	o__rhizobiales	c__alphaproteobacteria	p__proteobacteria	d__bacteria	TRUE	TRUE	5.9e-05	TRUE	1	GATCACCTCCTTTCT	GGACTGCTGAGGAGGCATCTTTGA	-9.72894
GCF_900234795.1	s__methylobacterium extorquens	g__methylobacterium	f__beijerinckiaceae	o__rhizobiales	c__alphaproteobacteria	p__proteobacteria	d__bacteria	TRUE	TRUE	7e-05	TRUE	1	GATCACCTCCTTTCT	GGGCTGCTGAGGAGGCATCTTTGA	-9.72894
GCF_003173715.1	s__methylobacterium durans	g__methylobacterium	f__beijerinckiaceae	o__rhizobiales	c__alphaproteobacteria	p__proteobacteria	d__bacteria	TRUE	TRUE	7e-05	TRUE	1	GATCACCTCCTTTCT	GGACTGCTGAGGAGGCATCTTTGA	-9.72894
GCF_016804325.1	s__methylobacterium aquaticum_c	g__methylobacterium	f__beijerinckiaceae	o__rhizobiales	c__alphaproteobacteria	p__proteobacteria	d__bacteria	TRUE	TRUE	5.9e-05	TRUE	1	GATCACCTCCTTTCT	GGACTGCTGAGGAGGCATCTTTGA	-9.72894
GCF_000022085.1	s__methylobacterium nodulans	g__methylobacterium	f__beijerinckiaceae	o__rhizobiales	c__alphaproteobacteria	p__proteobacteria	d__bacteria	TRUE	TRUE	5.9e-05	TRUE	1	GATCACCTCCTTTCT	GGACTGCTGAGGAGGCATCTTTGA	-9.72894
GCF_003173775.1	s__methylobacterium sp003173775	g__methylobacterium	f__beijerinckiaceae	o__rhizobiales	c__alphaproteobacteria	p__proteobacteria	d__bacteria	TRUE	TRUE	5.9e-05	TRUE	1	GATCACCTCCTTTCT	GGACTGCTGAGGAGGCATCTTTGA	-9.72894
GCF_000364445.2	s__methylobacterium mesophilicum	g__methylobacterium	f__beijerinckiaceae	o__rhizobiales	c__alphaproteobacteria	p__proteobacteria	d__bacteria	TRUE	TRUE	7e-05	TRUE	1	GATCACCTCCTTTCT	GGGCTGCTGAGGAGGCATCTTTGA	-9.72894
GCF_000021745.1	s__methylocella silvestris	g__methylocella	f__beijerinckiaceae	o__rhizobiales	c__alphaproteobacteria	p__proteobacteria	d__bacteria	TRUE	TRUE	7.4e-05	TRUE	1	GATCACCTCCTTTCT	GGATTGCTGAGGAGGCATCTTTGA	-9.72894
GCF_004802635.2	s__methylocystis heyeri	g__methylocystis	f__beijerinckiaceae	o__rhizobiales	c__alphaproteobacteria	p__proteobacteria	d__bacteria	TRUE	TRUE	0.0025	TRUE	1	GATCACCTCCTTTCT	GGACTGCTGAGGAGGCATCTTTGA	-9.72894
GCF_002117405.1	s__methylocystis bryophila	g__methylocystis	f__beijerinckiaceae	o__rhizobiales	c__alphaproteobacteria	p__proteobacteria	d__bacteria	TRUE	TRUE	0.0023	TRUE	1	GATCACCTCCTTTCT	GGACTGCTGAGGAGGCATCTTTGA	-9.72894
GCF_000304315.1	s__methylocystis sp000304315	g__methylocystis	f__beijerinckiaceae	o__rhizobiales	c__alphaproteobacteria	p__proteobacteria	d__bacteria	TRUE	TRUE	0.0019	TRUE	1	GATCACCTCCTTTCT	GGACTGCTGAGGAGGCATCTTTGA	-9.72894
GCF_009936375.1	s__methylosinus sp009936375	g__methylosinus	f__beijerinckiaceae	o__rhizobiales	c__alphaproteobacteria	p__proteobacteria	d__bacteria	TRUE	TRUE	0.0045	TRUE	1	GATCACCTCCTTTCT	GGACTGCTGAGGAGGCATCTTTGA	-9.72894
GCF_002752655.1	s__methylosinus trichosporium	g__methylosinus	f__beijerinckiaceae	o__rhizobiales	c__alphaproteobacteria	p__proteobacteria	d__bacteria	TRUE	TRUE	0.0045	TRUE	1	GATCACCTCCTTTCT	GGACTGCTGAGGAGGCATCTTTGA	-9.72894
GCF_004135935.1	s__methylovirgula ligni	g__methylovirgula	f__beijerinckiaceae	o__rhizobiales	c__alphaproteobacteria	p__proteobacteria	d__bacteria	TRUE	TRUE	0.0023	TRUE	1	GATCACCTCCTTTCT	GGGTTGCTGAGGAGGCATCTTTGA	-9.72894
GCF_000348745.1	s__micavibrio aeruginosavorus_a	g__micavibrio	f__micavibrionaceae	o__micavibrionales	c__alphaproteobacteria	p__proteobacteria	d__bacteria	TRUE	TRUE	3.6e-07	TRUE	1	GATCACCTCCTTTCT	GCCTTGCTGAGGAGGCATCTTTGA	-9.72894
GCF_000226315.1	s__micavibrio aeruginosavorus_b	g__micavibrio	f__micavibrionaceae	o__micavibrionales	c__alphaproteobacteria	p__proteobacteria	d__bacteria	TRUE	TRUE	4.4e-07	TRUE	1	GATCACCTCCTTTCT	ACCTTGCTGAGGAGGCATCTTTGA	-9.72894
GCF_009363855.1	s__microvirga thermotolerans	g__microvirga	f__beijerinckiaceae	o__rhizobiales	c__alphaproteobacteria	p__proteobacteria	d__bacteria	TRUE	TRUE	0.00017	TRUE	1	GATCACCTCCTTTCT	GGGCTGCTGAGGAGGCATCTTTGA	-9.72894
GCF_002741015.1	s__microvirga ossetica	g__microvirga	f__beijerinckiaceae	o__rhizobiales	c__alphaproteobacteria	p__proteobacteria	d__bacteria	TRUE	TRUE	4.5e-05	TRUE	1	GATCACCTCCTTTCT	GGGCTGCTGAGGAGGCATCTTTGA	-9.72894
GCF_016864375.1	s__microvirga sp016864375	g__microvirga	f__beijerinckiaceae	o__rhizobiales	c__alphaproteobacteria	p__proteobacteria	d__bacteria	TRUE	TRUE	4.5e-05	TRUE	1	GATCACCTCCTTTCT	GGGCTGCTGAGGAGGCATCTTTGA	-9.72894
GCF_003151255.1	s__microvirga sp003151255	g__microvirga	f__beijerinckiaceae	o__rhizobiales	c__alphaproteobacteria	p__proteobacteria	d__bacteria	TRUE	TRUE	0.00011	TRUE	1	GATCACCTCCTTTCT	GGGCTGCTGAGGAGGCATCTTTGA	-9.72894
GCF_009754905.2	s__mucilaginibacter ginkgonis	g__mucilaginibacter	f__sphingobacteriaceae	o__sphingobacteriales	c__bacteroidia	p__bacteroidota	d__bacteria	TRUE	TRUE	0.0007	TRUE	1	GAATACCTCCTTTCT	GCTTCCCTGAGGAGGCATCTTTGA	-9.72894
GCF_002355435.1	s__mucilaginibacter gotjawali	g__mucilaginibacter	f__sphingobacteriaceae	o__sphingobacteriales	c__bacteroidia	p__bacteroidota	d__bacteria	TRUE	TRUE	4.4e-05	TRUE	1	GAATACCTCCTTTCT	ACTTCCCTGAGGAGGCATCTTTGA	-9.72894
GCF_007971025.1	s__mucilaginibacter ginsenosidivorans	g__mucilaginibacter	f__sphingobacteriaceae	o__sphingobacteriales	c__bacteroidia	p__bacteroidota	d__bacteria	TRUE	TRUE	9.1e-06	TRUE	1	GAATACCTCCTTTCT	ACTTCCCTGAGGAGGCATCTTTGA	-9.72894
GCF_013283875.1	s__mucilaginibacter mali	g__mucilaginibacter	f__sphingobacteriaceae	o__sphingobacteriales	c__bacteroidia	p__bacteroidota	d__bacteria	TRUE	TRUE	0.00041	TRUE	1	GAATACCTCCTTTCT	GCTTCCCTGAGGAGGCACCTTTGA	-9.72894
GCF_002257585.1	s__mucilaginibacter xinganensis	g__mucilaginibacter	f__sphingobacteriaceae	o__sphingobacteriales	c__bacteroidia	p__bacteroidota	d__bacteria	TRUE	TRUE	0.00017	TRUE	1	GAATACCTCCTTTCT	ACTTCCCTGAGGAGGCATCTTTGA	-9.72894
GCF_007971525.1	s__mucilaginibacter ginsenosidivorax	g__mucilaginibacter	f__sphingobacteriaceae	o__sphingobacteriales	c__bacteroidia	p__bacteroidota	d__bacteria	TRUE	TRUE	0.00037	TRUE	1	GAATACCTCCTTTCT	GCTTCCCTGAGGAGGCATCTTTGA	-9.72894
GCF_012849215.1	s__mucilaginibacter sp012849215	g__mucilaginibacter	f__sphingobacteriaceae	o__sphingobacteriales	c__bacteroidia	p__bacteroidota	d__bacteria	TRUE	TRUE	0.00011	TRUE	1	GAATACCTCCTTTCT	GCTTCCCTGAGGAGGCATCTTTGA	-9.72894
GCF_003576455.2	s__mucilaginibacter celer	g__mucilaginibacter	f__sphingobacteriaceae	o__sphingobacteriales	c__bacteroidia	p__bacteroidota	d__bacteria	TRUE	TRUE	0.00097	TRUE	1	GAATACCTCCTTTCT	ACTTCCCTGAGGAGGCATCTTTGA	-9.72894
GCF_010093045.1	s__mucilaginibacter sp010093045	g__mucilaginibacter	f__sphingobacteriaceae	o__sphingobacteriales	c__bacteroidia	p__bacteroidota	d__bacteria	TRUE	TRUE	0.005	TRUE	1	GAATACCTCCTTTCT	ACTTCCCTGAGGAGGCATCTTTGA	-9.72894
GCF_002005465.1	s__neoasaia chiangmaiensis	g__neoasaia	f__acetobacteraceae	o__acetobacterales	c__alphaproteobacteria	p__proteobacteria	d__bacteria	TRUE	TRUE	0.00017	TRUE	1	GATCACCTCCTTTCA	GCGCTGCTGAGGAGGCATCTTTGA	-9.72894
GCF_006542335.1	s__neokomagataea tanensis	g__neokomagataea	f__acetobacteraceae	o__acetobacterales	c__alphaproteobacteria	p__proteobacteria	d__bacteria	TRUE	TRUE	0.00011	TRUE	1	GATCACCTCCTTTCA	GCACTGCTGAGGAGGCATCTTTAA	-9.72894
GCF_003491345.1	s__neorhizobium sp003491345	g__neorhizobium	f__rhizobiaceae	o__rhizobiales	c__alphaproteobacteria	p__proteobacteria	d__bacteria	TRUE	TRUE	2.1e-06	TRUE	1	GATCACCTCCTTTCT	AGCCTGCTGAGGAGGCATCTTTGA	-9.72894
GCF_003597675.1	s__neorhizobium sp003597675	g__neorhizobium	f__rhizobiaceae	o__rhizobiales	c__alphaproteobacteria	p__proteobacteria	d__bacteria	TRUE	TRUE	3.7e-06	TRUE	1	GATCACCTCCTTTCT	AGCCTGCTGAGGAGGCATCTTTGA	-9.72894
GCF_000731315.1	s__neorhizobium galegae	g__neorhizobium	f__rhizobiaceae	o__rhizobiales	c__alphaproteobacteria	p__proteobacteria	d__bacteria	TRUE	TRUE	2.1e-06	TRUE	1	GATCACCTCCTTTCT	AGCCTGCTGAGGAGGCATCTTTGA	-9.72894
GCF_007922615.2	s__nitratireductor_d sp007922615	g__nitratireductor_d	f__rhizobiaceae	o__rhizobiales	c__alphaproteobacteria	p__proteobacteria	d__bacteria	TRUE	TRUE	1.9e-06	TRUE	1	GATCACCTCCTTTCT	AGCCTGCTGAGGAGGCATCTTTGA	-9.72894
GCF_000012725.1	s__nitrobacter winogradskyi	g__nitrobacter	f__xanthobacteraceae	o__rhizobiales	c__alphaproteobacteria	p__proteobacteria	d__bacteria	TRUE	TRUE	1.4e-06	TRUE	1	GATCACCTCCTTTCT	GGGCTGCTGAGGAGGCATCTTTGA	-9.72894
GCF_000013885.1	s__nitrobacter hamburgensis	g__nitrobacter	f__xanthobacteraceae	o__rhizobiales	c__alphaproteobacteria	p__proteobacteria	d__bacteria	TRUE	TRUE	1.4e-06	TRUE	1	GATCACCTCCTTTCT	GGGCTGCTGAGGAGGCATCTTTGA	-9.72894
GCF_002868735.1	s__niveispirillum cyanobacteriorum	g__niveispirillum	f__azospirillaceae	o__azospirillales	c__alphaproteobacteria	p__proteobacteria	d__bacteria	TRUE	TRUE	0.0012	TRUE	1	GATCACCTCCTTTCT	GTCCTGCTGAGGAGGCATCTTTGA	-9.72894
GCF_011046735.1	s__nordella sp011046735	g__nordella	f__aestuariivirgaceae	o__rhizobiales	c__alphaproteobacteria	p__proteobacteria	d__bacteria	TRUE	TRUE	5.1e-07	TRUE	1	GATCACCTCCTTTCT	GGACTGCTGAGGAGGCATCTTTGA	-9.72894
GCF_000017405.1	s__ochrobactrum anthropi	g__ochrobactrum	f__rhizobiaceae_a	o__rhizobiales_a	c__alphaproteobacteria	p__proteobacteria	d__bacteria	TRUE	TRUE	1.3e-06	TRUE	1	GATCACCTCCTTTCT	AGCCTGCTGAGGAGGCATCTTTGA	-9.72894
GCF_002278035.1	s__ochrobactrum_a quorumnocens	g__ochrobactrum_a	f__rhizobiaceae_a	o__rhizobiales_a	c__alphaproteobacteria	p__proteobacteria	d__bacteria	TRUE	TRUE	1.3e-06	TRUE	1	GATCACCTCCTTTCT	AGCCTGCTGAGGAGGCATCTTTGA	-9.72894
GCF_018798825.1	s__ochrobactrum_a sp018798825	g__ochrobactrum_a	f__rhizobiaceae_a	o__rhizobiales_a	c__alphaproteobacteria	p__proteobacteria	d__bacteria	TRUE	TRUE	1.3e-06	TRUE	1	GATCACCTCCTTTCT	AGCCTGCTGAGGAGGCATCTTTGA	-9.72894
GCF_006542375.1	s__oecophyllibacter saccharovorans	g__oecophyllibacter	f__acetobacteraceae	o__acetobacterales	c__alphaproteobacteria	p__proteobacteria	d__bacteria	TRUE	TRUE	0.0002	TRUE	1	GATCACCTCCTTTCA	GCACTGCTGAGGAGGCATCTTTGA	-9.72894
GCF_013358405.1	s__oricola thermophila	g__oricola	f__rhizobiaceae	o__rhizobiales	c__alphaproteobacteria	p__proteobacteria	d__bacteria	TRUE	TRUE	6.8e-06	TRUE	1	GATCACCTCCTTTCT	AGCCTGCTGAGGAGGCATCTTTGA	-9.72894
GCF_016801025.1	s__paradevosia shaoguanensis	g__paradevosia	f__devosiaceae	o__rhizobiales	c__alphaproteobacteria	p__proteobacteria	d__bacteria	TRUE	TRUE	0.00095	TRUE	1	GATCACCTCCTTTCT	AGCCTGCTGAGGAGGCATCTTTGA	-9.72894
GCF_000284415.1	s__pararhodospirillum photometricum	g__pararhodospirillum	f__rhodospirillaceae	o__rhodospirillales	c__alphaproteobacteria	p__proteobacteria	d__bacteria	TRUE	TRUE	0.00057	TRUE	1	GATCACCTCCTTTCA	GCCCTGCTGAGGAGGCATCTTTGA	-9.72894
GCF_006385135.1	s__paremcibacter congregatus	g__paremcibacter	f__emcibacteraceae	o__sphingomonadales	c__alphaproteobacteria	p__proteobacteria	d__bacteria	TRUE	TRUE	0.00026	TRUE	1	GATCACCTCCTTTCT	GAACTGCTGAGGAGGCATCTTTGA	-9.72894
GCF_000017565.1	s__parvibaculum lavamentivorans	g__parvibaculum	f__parvibaculaceae	o__parvibaculales	c__alphaproteobacteria	p__proteobacteria	d__bacteria	TRUE	TRUE	6.7e-05	TRUE	1	GATCACCTCCTTTCT	GCGCTGCTGAGGAGGCATCTTTGA	-9.72894
GCF_000152825.2	s__parvularcula bermudensis	g__parvularcula	f__parvularculaceae	o__caulobacterales	c__alphaproteobacteria	p__proteobacteria	d__bacteria	TRUE	TRUE	0.0016	TRUE	1	GATCACCTCCTTTCT	GCCCTGCTGAGGAGGCGTCTTTGA	-9.72894
GCF_001590605.1	s__pedobacter cryoconitis_a	g__pedobacter	f__sphingobacteriaceae	o__sphingobacteriales	c__bacteroidia	p__bacteroidota	d__bacteria	TRUE	TRUE	0.00023	TRUE	1	GAATACCTCCTTTCT	GCGTCGCTGAGGAGGCATCTTTGA	-9.72894
GCF_001721645.1	s__pedobacter steynii_a	g__pedobacter	f__sphingobacteriaceae	o__sphingobacteriales	c__bacteroidia	p__bacteroidota	d__bacteria	TRUE	TRUE	0.00028	TRUE	1	GAATACCTCCTTTCT	GCGTCGCTGAGGAGGCATCTTTGA	-9.72894
GCF_015679185.1	s__pedobacter sp015679185	g__pedobacter	f__sphingobacteriaceae	o__sphingobacteriales	c__bacteroidia	p__bacteroidota	d__bacteria	TRUE	TRUE	0.00035	TRUE	1	GAATACCTCCTTTCT	ACGTCTCTGAGGAGGCATCTTTGA	-9.72894
GCF_001412655.1	s__pedobacter sp001412655	g__pedobacter	f__sphingobacteriaceae	o__sphingobacteriales	c__bacteroidia	p__bacteroidota	d__bacteria	TRUE	TRUE	0.00028	TRUE	1	GAATACCTCCTTTCT	GCGTCGCTGAGGAGGCATCTTTGA	-9.72894
GCF_000230555.1	s__pelagibacterium halotolerans	g__pelagibacterium	f__devosiaceae	o__rhizobiales	c__alphaproteobacteria	p__proteobacteria	d__bacteria	TRUE	TRUE	1.7e-06	TRUE	1	GATCACCTCCTTTCT	AGCCTGCTGAGGAGGCATCTTTGA	-9.72894
GCF_000190735.1	s__pelobium saltans	g__pelobium	f__sphingobacteriaceae	o__sphingobacteriales	c__bacteroidia	p__bacteroidota	d__bacteria	TRUE	TRUE	2.9e-06	TRUE	1	GAATACCTCCTTTCT	ACGTCTCTGAGGAGGCATCTTTGA	-9.72894
GCF_005144885.1	s__phreatobacter stygius	g__phreatobacter	f__phreatobacteraceae	o__rhizobiales	c__alphaproteobacteria	p__proteobacteria	d__bacteria	TRUE	TRUE	0.00011	TRUE	1	GATCACCTCCTTTCT	GGACTCCTGAGGAGGCATCTTTGA	-9.72894
GCF_003008515.1	s__phreatobacter cathodiphilus	g__phreatobacter	f__phreatobacteraceae	o__rhizobiales	c__alphaproteobacteria	p__proteobacteria	d__bacteria	TRUE	TRUE	0.00011	TRUE	1	GATCACCTCCTTTCT	GGGCTCCTGAGGAGGCATCTTTGA	-9.72894
GCF_002764115.1	s__phyllobacterium zundukense	g__phyllobacterium	f__rhizobiaceae_a	o__rhizobiales_a	c__alphaproteobacteria	p__proteobacteria	d__bacteria	TRUE	TRUE	7.6e-07	TRUE	1	GATCACCTCCTTTCT	AGCCTGCTGAGGAGGCATCTTTGA	-9.72894
GCF_014189505.1	s__phyllobacterium sp014189505	g__phyllobacterium	f__rhizobiaceae_a	o__rhizobiales_a	c__alphaproteobacteria	p__proteobacteria	d__bacteria	TRUE	TRUE	7.6e-07	TRUE	1	GATCACCTCCTTTCT	AGCCTGCTGAGGAGGCATCTTTGA	-9.72894
GCF_000192745.1	s__polymorphum gilvum	g__polymorphum	f__stappiaceae	o__rhizobiales	c__alphaproteobacteria	p__proteobacteria	d__bacteria	TRUE	TRUE	8.2e-06	TRUE	1	GATCACCTCCTTTCT	AGCCTGCTGAGGAGGCATCTTTGA	-9.72894
GCF_005153485.1	s__pseudolabrys sp005153485	g__pseudolabrys	f__xanthobacteraceae	o__rhizobiales	c__alphaproteobacteria	p__proteobacteria	d__bacteria	TRUE	TRUE	1.5e-06	TRUE	1	GATCACCTCCTTTCT	GGGCTGCTGAGGAGGCATCTTTGA	-9.72894
GCF_902502825.2	s__pseudorhizobium flavum	g__pseudorhizobium	f__rhizobiaceae	o__rhizobiales	c__alphaproteobacteria	p__proteobacteria	d__bacteria	TRUE	TRUE	1.9e-05	TRUE	1	GATCACCTCCTTTCT	AGCCTGCTGAGGAGGCATCTTTGA	-9.72894
GCF_002119765.1	s__pseudorhodoplanes sinuspersici	g__pseudorhodoplanes	f__xanthobacteraceae	o__rhizobiales	c__alphaproteobacteria	p__proteobacteria	d__bacteria	TRUE	TRUE	1.6e-05	TRUE	1	GATCACCTCCTTTCT	GGACTGCTGAGGAGGCATCTTTGA	-9.72894
GCF_014334135.1	s__pseudosphingobacterium sp014334135	g__pseudosphingobacterium	f__sphingobacteriaceae	o__sphingobacteriales	c__bacteroidia	p__bacteroidota	d__bacteria	TRUE	TRUE	0.00017	TRUE	1	GAATACCTCCTTTCT	GCTTCCCTGAGGAGGCATCTTTGA	-9.72894
GCF_012848855.1	s__pyruvatibacter mobilis	g__pyruvatibacter	f__cgmcc-115125	o__parvibaculales	c__alphaproteobacteria	p__proteobacteria	d__bacteria	TRUE	TRUE	1.9e-07	TRUE	1	GATCACCTCCTTTCT	GCACTGCTGAGGAGGCATCTTTGA	-9.72894
GCF_000816845.1	s__rhizobium gallicum	g__rhizobium	f__rhizobiaceae	o__rhizobiales	c__alphaproteobacteria	p__proteobacteria	d__bacteria	TRUE	TRUE	6.6e-06	TRUE	1	GATCACCTCCTTTCT	ACCCTGCTGAGGAGGCATCTTTGA	-9.72894
GCF_000172795.2	s__rhizobium sp000172795	g__rhizobium	f__rhizobiaceae	o__rhizobiales	c__alphaproteobacteria	p__proteobacteria	d__bacteria	TRUE	TRUE	6.6e-06	TRUE	1	GATCACCTCCTTTCT	ACCCTGCTGAGGAGGCATCTTTGA	-9.72894
GCF_017948245.1	s__rhizobium sp017948245	g__rhizobium	f__rhizobiaceae	o__rhizobiales	c__alphaproteobacteria	p__proteobacteria	d__bacteria	TRUE	TRUE	6.6e-06	TRUE	1	GATCACCTCCTTTCT	ACCCTGCTGAGGAGGCATCTTTGA	-9.72894
GCF_002944315.1	s__rhizobium sp002944315	g__rhizobium	f__rhizobiaceae	o__rhizobiales	c__alphaproteobacteria	p__proteobacteria	d__bacteria	TRUE	TRUE	5.5e-06	TRUE	1	GATCACCTCCTTTCT	AGCCTGCTGAGGAGGCATCTTTGA	-9.72894
GCF_000769405.2	s__rhizobium leguminosarum_e	g__rhizobium	f__rhizobiaceae	o__rhizobiales	c__alphaproteobacteria	p__proteobacteria	d__bacteria	TRUE	TRUE	6.6e-06	TRUE	1	GATCACCTCCTTTCT	ACCCTGCTGAGGAGGCATCTTTGA	-9.72894
GCF_003627755.1	s__rhizobium jaguaris	g__rhizobium	f__rhizobiaceae	o__rhizobiales	c__alphaproteobacteria	p__proteobacteria	d__bacteria	TRUE	TRUE	5.5e-06	TRUE	1	GATCACCTCCTTTCT	AGCCTGCTGAGGAGGCATCTTTGA	-9.72894
GCF_017357225.1	s__rhizobium binae	g__rhizobium	f__rhizobiaceae	o__rhizobiales	c__alphaproteobacteria	p__proteobacteria	d__bacteria	TRUE	TRUE	6.6e-06	TRUE	1	GATCACCTCCTTTCT	ACCCTGCTGAGGAGGCATCTTTGA	-9.72894
GCF_001664485.1	s__rhizobium sp001664485	g__rhizobium	f__rhizobiaceae	o__rhizobiales	c__alphaproteobacteria	p__proteobacteria	d__bacteria	TRUE	TRUE	6.6e-06	TRUE	1	GATCACCTCCTTTCT	ACCCTGCTGAGGAGGCATCTTTGA	-9.72894
GCF_017357385.1	s__rhizobium sp017357385	g__rhizobium	f__rhizobiaceae	o__rhizobiales	c__alphaproteobacteria	p__proteobacteria	d__bacteria	TRUE	TRUE	6.6e-06	TRUE	1	GATCACCTCCTTTCT	ACCCTGCTGAGGAGGCATCTTTGA	-9.72894
GCF_005862305.2	s__rhizobium indicum	g__rhizobium	f__rhizobiaceae	o__rhizobiales	c__alphaproteobacteria	p__proteobacteria	d__bacteria	TRUE	TRUE	6.6e-06	TRUE	1	GATCACCTCCTTTCT	ACCCTGCTGAGGAGGCATCTTTGA	-9.72894
GCF_002953715.1	s__rhizobium leguminosarum_k	g__rhizobium	f__rhizobiaceae	o__rhizobiales	c__alphaproteobacteria	p__proteobacteria	d__bacteria	TRUE	TRUE	6.6e-06	TRUE	1	GATCACCTCCTTTCT	ACCCTGCTGAGGAGGCATCTTTGA	-9.72894
GCF_015353075.1	s__rhizobium yanglingense	g__rhizobium	f__rhizobiaceae	o__rhizobiales	c__alphaproteobacteria	p__proteobacteria	d__bacteria	TRUE	TRUE	6.6e-06	TRUE	1	GATCACCTCCTTTCT	ACCCTGCTGAGGAGGCATCTTTGA	-9.72894
GCF_017352135.1	s__rhizobium lentis	g__rhizobium	f__rhizobiaceae	o__rhizobiales	c__alphaproteobacteria	p__proteobacteria	d__bacteria	TRUE	TRUE	6.6e-06	TRUE	1	GATCACCTCCTTTCT	ACCCTGCTGAGGAGGCATCTTTGA	-9.72894
GCF_002117485.1	s__rhizobium sp002117485	g__rhizobium	f__rhizobiaceae	o__rhizobiales	c__alphaproteobacteria	p__proteobacteria	d__bacteria	TRUE	TRUE	6.6e-06	TRUE	1	GATCACCTCCTTTCT	ACCCTGCTGAGGAGGCATCTTTGA	-9.72894
GCF_003627795.1	s__rhizobium sp003627795	g__rhizobium	f__rhizobiaceae	o__rhizobiales	c__alphaproteobacteria	p__proteobacteria	d__bacteria	TRUE	TRUE	4.3e-05	TRUE	1	GATCACCTCCTTTCT	ACCCTGCTGAGGAGGCATCTTTGA	-9.72894
GCF_000092045.1	s__rhizobium etli	g__rhizobium	f__rhizobiaceae	o__rhizobiales	c__alphaproteobacteria	p__proteobacteria	d__bacteria	TRUE	TRUE	6.6e-06	TRUE	1	GATCACCTCCTTTCT	ACCCTGCTGAGGAGGCATCTTTGA	-9.72894
GCF_000009265.1	s__rhizobium leguminosarum_l	g__rhizobium	f__rhizobiaceae	o__rhizobiales	c__alphaproteobacteria	p__proteobacteria	d__bacteria	TRUE	TRUE	6.6e-06	TRUE	1	GATCACCTCCTTTCT	ACCCTGCTGAGGAGGCATCTTTGA	-9.72894
GCF_000023185.1	s__rhizobium leguminosarum_j	g__rhizobium	f__rhizobiaceae	o__rhizobiales	c__alphaproteobacteria	p__proteobacteria	d__bacteria	TRUE	TRUE	6.6e-06	TRUE	1	GATCACCTCCTTTCT	ACCCTGCTGAGGAGGCATCTTTGA	-9.72894
GCF_001908375.1	s__rhizobium etli_b	g__rhizobium	f__rhizobiaceae	o__rhizobiales	c__alphaproteobacteria	p__proteobacteria	d__bacteria	TRUE	TRUE	6.6e-06	TRUE	1	GATCACCTCCTTTCT	ACCCTGCTGAGGAGGCATCTTTGA	-9.72894
GCF_002531755.2	s__rhizobium acidisoli	g__rhizobium	f__rhizobiaceae	o__rhizobiales	c__alphaproteobacteria	p__proteobacteria	d__bacteria	TRUE	TRUE	6.6e-06	TRUE	1	GATCACCTCCTTTCT	ACCCTGCTGAGGAGGCATCTTTGA	-9.72894
GCF_018987265.1	s__rhizobium sp018987265	g__rhizobium	f__rhizobiaceae	o__rhizobiales	c__alphaproteobacteria	p__proteobacteria	d__bacteria	TRUE	TRUE	2.8e-06	TRUE	1	GATCACCTCCTTTCT	ACCCTGCTGAGGAGGCATCTTTGA	-9.72894
GCF_017357245.1	s__rhizobium bangladeshense	g__rhizobium	f__rhizobiaceae	o__rhizobiales	c__alphaproteobacteria	p__proteobacteria	d__bacteria	TRUE	TRUE	6.6e-06	TRUE	1	GATCACCTCCTTTCT	ACCCTGCTGAGGAGGCATCTTTGA	-9.72894
GCF_002277895.1	s__rhizobium sp002277895	g__rhizobium	f__rhizobiaceae	o__rhizobiales	c__alphaproteobacteria	p__proteobacteria	d__bacteria	TRUE	TRUE	4.3e-05	TRUE	1	GATCACCTCCTTTCT	ACCCTGCTGAGGAGGCATCTTTGA	-9.72894
GCF_000330885.1	s__rhizobium tropici	g__rhizobium	f__rhizobiaceae	o__rhizobiales	c__alphaproteobacteria	p__proteobacteria	d__bacteria	TRUE	TRUE	3e-05	TRUE	1	GATCACCTCCTTTCT	ACCCTGCTGAGGAGGCATCTTTGA	-9.72894
GCF_009498215.1	s__rhizobium grahamii_a	g__rhizobium	f__rhizobiaceae	o__rhizobiales	c__alphaproteobacteria	p__proteobacteria	d__bacteria	TRUE	TRUE	2.8e-06	TRUE	1	GATCACCTCCTTTCT	ACCCTGCTGAGGAGGCATCTTTGA	-9.72894
GCF_011046895.1	s__rhizobium_a rhizoryzae	g__rhizobium_a	f__rhizobiaceae	o__rhizobiales	c__alphaproteobacteria	p__proteobacteria	d__bacteria	TRUE	TRUE	3.8e-07	TRUE	1	GATCACCTCCTTTCT	AGCCTGCTGAGGAGGCATCTTTGA	-9.72894
GCF_011046245.1	s__rhizobium_a pseudoryzae	g__rhizobium_a	f__rhizobiaceae	o__rhizobiales	c__alphaproteobacteria	p__proteobacteria	d__bacteria	TRUE	TRUE	8.9e-07	TRUE	1	GATCACCTCCTTTCT	AGCCTGCTGAGGAGGCATCTTTGA	-9.72894
GCF_013415845.1	s__rhodopseudomonas palustris_f	g__rhodopseudomonas	f__xanthobacteraceae	o__rhizobiales	c__alphaproteobacteria	p__proteobacteria	d__bacteria	TRUE	TRUE	1.4e-06	TRUE	1	GATCACCTCCTTTCT	GGGCTGCTGAGGAGGCATCTTTGA	-9.72894
GCF_000013365.1	s__rhodopseudomonas palustris_j	g__rhodopseudomonas	f__xanthobacteraceae	o__rhizobiales	c__alphaproteobacteria	p__proteobacteria	d__bacteria	TRUE	TRUE	1.4e-06	TRUE	1	GATCACCTCCTTTCT	GGGCTGCTGAGGAGGCATCTTTGA	-9.72894
GCF_003031265.1	s__rhodopseudomonas palustris_h	g__rhodopseudomonas	f__xanthobacteraceae	o__rhizobiales	c__alphaproteobacteria	p__proteobacteria	d__bacteria	TRUE	TRUE	1.4e-06	TRUE	1	GATCACCTCCTTTCT	GGGCTGCTGAGGAGGCATCTTTGA	-9.72894
GCF_000013085.1	s__rhodospirillum rubrum	g__rhodospirillum	f__rhodospirillaceae	o__rhodospirillales	c__alphaproteobacteria	p__proteobacteria	d__bacteria	TRUE	TRUE	2.5e-05	TRUE	1	GATCACCTCCTTTCA	GCGCTGCTGAGGAGGCATCTTTGA	-9.72894
GCF_009363435.1	s__roseibium sp009363435	g__roseibium	f__stappiaceae	o__rhizobiales	c__alphaproteobacteria	p__proteobacteria	d__bacteria	TRUE	TRUE	8.2e-06	TRUE	1	GATCACCTCCTTTCT	AGCCTGCTGAGGAGGCATCTTTGA	-9.72894
GCF_001999245.1	s__roseibium aggregatum_a	g__roseibium	f__stappiaceae	o__rhizobiales	c__alphaproteobacteria	p__proteobacteria	d__bacteria	TRUE	TRUE	8.2e-06	TRUE	1	GATCACCTCCTTTCT	AGCCTGCTGAGGAGGCATCTTTGA	-9.72894
GCF_006517275.1	s__roseibium sp006517275	g__roseibium	f__stappiaceae	o__rhizobiales	c__alphaproteobacteria	p__proteobacteria	d__bacteria	TRUE	TRUE	8.2e-06	TRUE	1	GATCACCTCCTTTCT	AGCCTGCTGAGGAGGCATCTTTGA	-9.72894
GCF_002237595.1	s__roseibium sp002237595	g__roseibium	f__stappiaceae	o__rhizobiales	c__alphaproteobacteria	p__proteobacteria	d__bacteria	TRUE	TRUE	8.2e-06	TRUE	1	GATCACCTCCTTTCT	AGCCTGCTGAGGAGGCATCTTTGA	-9.72894
GCF_004331955.1	s__roseitalea porphyridii	g__roseitalea	f__rhizobiaceae	o__rhizobiales	c__alphaproteobacteria	p__proteobacteria	d__bacteria	TRUE	TRUE	9.1e-05	TRUE	1	GATCACCTCCTTTCT	GCCCTGCTGAGGAGGCATCTTTGA	-9.72894
GCF_014764365.1	s__roseococcus sp014764365	g__roseococcus	f__acetobacteraceae	o__acetobacterales	c__alphaproteobacteria	p__proteobacteria	d__bacteria	TRUE	TRUE	0.0027	TRUE	1	GATCACCTCCTTTCA	TCCCTGCTGAGGAGGCATCTTTGA	-9.72894
GCF_001953055.1	s__salaquimonas pukyongi	g__salaquimonas	f__rhizobiaceae	o__rhizobiales	c__alphaproteobacteria	p__proteobacteria	d__bacteria	TRUE	TRUE	3.5e-06	TRUE	1	GATCACCTCCTTTCT	GGGCTGCTGAGGAGGCATCTTTGA	-9.72894
GCF_001443605.1	s__salinivirga cyanobacteriivorans	g__salinivirga	f__salinivirgaceae	o__bacteroidales	c__bacteroidia	p__bacteroidota	d__bacteria	TRUE	TRUE	0.00033	TRUE	1	GAACACCTCCTTTCT	GATGCGTTGAGGAGGCATCTTTGA	-9.72894
GCF_016839145.1	s__shinella sp016839145	g__shinella	f__rhizobiaceae	o__rhizobiales	c__alphaproteobacteria	p__proteobacteria	d__bacteria	TRUE	TRUE	8.3e-07	TRUE	1	GATCACCTCCTTTCT	AGCCTGCTGAGGAGGCATCTTTGA	-9.72894
GCF_008932245.1	s__sinorhizobium alkalisoli	g__sinorhizobium	f__rhizobiaceae	o__rhizobiales	c__alphaproteobacteria	p__proteobacteria	d__bacteria	TRUE	TRUE	7.5e-07	TRUE	1	GATCACCTCCTTTCT	AGCCTGCTGAGGAGGCATCTTTGA	-9.72894
GCF_002288525.1	s__sinorhizobium sojae	g__sinorhizobium	f__rhizobiaceae	o__rhizobiales	c__alphaproteobacteria	p__proteobacteria	d__bacteria	TRUE	TRUE	7.5e-07	TRUE	1	GATCACCTCCTTTCT	AGCCTGCTGAGGAGGCATCTTTGA	-9.72894
GCF_002944405.1	s__sinorhizobium fredii_c	g__sinorhizobium	f__rhizobiaceae	o__rhizobiales	c__alphaproteobacteria	p__proteobacteria	d__bacteria	TRUE	TRUE	7.5e-07	TRUE	1	GATCACCTCCTTTCT	AGCCTGCTGAGGAGGCATCTTTGA	-9.72894
GCF_013488225.1	s__sinorhizobium mexicanum	g__sinorhizobium	f__rhizobiaceae	o__rhizobiales	c__alphaproteobacteria	p__proteobacteria	d__bacteria	TRUE	TRUE	7.5e-07	TRUE	1	GATCACCTCCTTTCT	AGCCTGCTGAGGAGGCATCTTTGA	-9.72894
GCF_008843145.1	s__skermanella pratensis	g__skermanella	f__azospirillaceae	o__azospirillales	c__alphaproteobacteria	p__proteobacteria	d__bacteria	TRUE	TRUE	1.8e-06	TRUE	1	GATCACCTCCTTTCT	GCGCTGCTGAGGAGGCATCTTTGA	-9.72894
GCF_016653635.2	s__skermanella sp016653635	g__skermanella	f__azospirillaceae	o__azospirillales	c__alphaproteobacteria	p__proteobacteria	d__bacteria	TRUE	TRUE	1.8e-06	TRUE	1	GATCACCTCCTTTCT	GCGCTGCTGAGGAGGCATCTTTGA	-9.72894
GCF_000242635.2	s__solitalea canadensis	g__solitalea	f__sphingobacteriaceae	o__sphingobacteriales	c__bacteroidia	p__bacteroidota	d__bacteria	TRUE	TRUE	0.00033	TRUE	1	GAATACCTCCTTTCT	GCTTCCCTGAGGAGGCATCTTTGA	-9.72894
GCF_011046555.1	s__sphingobacterium lactis	g__sphingobacterium	f__sphingobacteriaceae	o__sphingobacteriales	c__bacteroidia	p__bacteroidota	d__bacteria	TRUE	TRUE	0.0021	TRUE	1	GAATACCTCCTTTCT	GTATCCCTGAGGAGGCACCTTTGA	-9.72894
GCF_004526235.1	s__sphingobacterium sp002734245	g__sphingobacterium	f__sphingobacteriaceae	o__sphingobacteriales	c__bacteroidia	p__bacteroidota	d__bacteria	TRUE	TRUE	0.00013	TRUE	1	GAATACCTCCTTTCT	GCATCCCTGAGGAGGCATCTTTGA	-9.72894
GCF_901472535.1	s__sphingobacterium daejeonense	g__sphingobacterium	f__sphingobacteriaceae	o__sphingobacteriales	c__bacteroidia	p__bacteroidota	d__bacteria	TRUE	TRUE	0.00016	TRUE	1	GAATACCTCCTTTCT	ACATCCCTGAGGAGGCATCTTTGA	-9.72894
GCF_901482695.1	s__sphingobacterium thalpophilum	g__sphingobacterium	f__sphingobacteriaceae	o__sphingobacteriales	c__bacteroidia	p__bacteroidota	d__bacteria	TRUE	TRUE	7.5e-05	TRUE	1	GAATACCTCCTTTCT	ACTTCCCTGAGGAGGCATCTTTGA	-9.72894
GCF_000747525.1	s__sphingobacterium sp000747525	g__sphingobacterium	f__sphingobacteriaceae	o__sphingobacteriales	c__bacteroidia	p__bacteroidota	d__bacteria	TRUE	TRUE	0.00035	TRUE	1	GAATACCTCCTTTCT	ACTTCCCTGAGGAGGCATCTTTGA	-9.72894
GCF_009557615.1	s__sphingobacterium sp009557615	g__sphingobacterium	f__sphingobacteriaceae	o__sphingobacteriales	c__bacteroidia	p__bacteroidota	d__bacteria	TRUE	TRUE	3.4e-05	TRUE	1	GAATACCTCCTTTCT	ACTTCCCTGAGGAGGCATCTTTGA	-9.72894
GCF_900187125.1	s__sphingobacterium mizutaii	g__sphingobacterium	f__sphingobacteriaceae	o__sphingobacteriales	c__bacteroidia	p__bacteroidota	d__bacteria	TRUE	TRUE	0.00012	TRUE	1	GAATACCTCCTTTCT	ACTTCCCTGAGGAGGCATCTTTGA	-9.72894
GCF_009789575.1	s__stappia indica_a	g__stappia	f__stappiaceae	o__rhizobiales	c__alphaproteobacteria	p__proteobacteria	d__bacteria	TRUE	TRUE	6.7e-06	TRUE	1	GATCACCTCCTTTCT	AGCCTGCTGAGGAGGCATCTTTGA	-9.72894
GCF_018279705.1	s__tardiphaga sp018279705	g__tardiphaga	f__xanthobacteraceae	o__rhizobiales	c__alphaproteobacteria	p__proteobacteria	d__bacteria	TRUE	TRUE	1.4e-06	TRUE	1	GATCACCTCCTTTCT	GGGCTGCTGAGGAGGCATCTTTGA	-9.72894
GCF_002844375.1	s__thalassospira marina	g__thalassospira	f__thalassospiraceae	o__rhodospirillales	c__alphaproteobacteria	p__proteobacteria	d__bacteria	TRUE	TRUE	7.1e-06	TRUE	1	GATCACCTCCTTTCA	GCACTGCTGAGGAGGCATCTTTGA	-9.72894
GCF_003403095.1	s__thalassospira indica	g__thalassospira	f__thalassospiraceae	o__rhodospirillales	c__alphaproteobacteria	p__proteobacteria	d__bacteria	TRUE	TRUE	7.1e-06	TRUE	1	GATCACCTCCTTTCA	GCACTGCTGAGGAGGCATCTTTGA	-9.72894
GCF_000300235.2	s__thalassospira xiamenensis	g__thalassospira	f__thalassospiraceae	o__rhodospirillales	c__alphaproteobacteria	p__proteobacteria	d__bacteria	TRUE	TRUE	7.1e-06	TRUE	1	GATCACCTCCTTTCA	GCACTGCTGAGGAGGCATCTTTGA	-9.72894
GCF_002355335.1	s__variibacter gotjawalensis	g__variibacter	f__xanthobacteraceae	o__rhizobiales	c__alphaproteobacteria	p__proteobacteria	d__bacteria	TRUE	TRUE	6.3e-06	TRUE	1	GATCACCTCCTTTCT	GGACTGCTGAGGAGGCATCTTTGA	-9.72894
GCF_001579845.1	s__z2-yc6860 sp001579845	g__z2-yc6860	f__xanthobacteraceae	o__rhizobiales	c__alphaproteobacteria	p__proteobacteria	d__bacteria	TRUE	TRUE	5e-05	TRUE	1	GATCACCTCCTTTCT	GGACTGCTGAGGAGGCATCTTTGA	-9.72894
GCF_000014965.1	s__syntrophobacter fumaroxidans	g__syntrophobacter	f__syntrophobacteraceae	o__syntrophobacterales	c__syntrophobacteria	p__desulfobacterota	d__bacteria	TRUE	TRUE	2.5e-05	TRUE	1	GATCACCTCCTTTCT	CAGACCCTCGGGGGGTATCTTTGA	-9.52875
GCF_016865525.2	s__acerihabitans sp004346745	g__acerihabitans	f__enterobacteriaceae	o__enterobacterales	c__gammaproteobacteria	p__proteobacteria	d__bacteria	TRUE	TRUE	2.1e-10	TRUE	1	GATCACCTCCTTACC	GAAGTTCTCAGGGGGTATCTTTGA	-9.48051
GCF_001753245.1	s__acidihalobacter yilgarnenesis	g__acidihalobacter	f__acidihalobacteraceae	o__ectothiorhodospirales	c__gammaproteobacteria	p__proteobacteria	d__bacteria	TRUE	TRUE	4.2e-08	TRUE	1	GATCACCTCCTTTAA	GATGCCCTCAGGGGGTATCTTTGA	-9.48051
GCF_000175575.2	s__acidithiobacillus_a caldus	g__acidithiobacillus_a	f__acidithiobacillaceae	o__acidithiobacillales	c__gammaproteobacteria	p__proteobacteria	d__bacteria	TRUE	TRUE	5.4e-09	TRUE	1	GATCACCTCCTTTAA	CAGGGTCTTAGGGGGTATCTTTGA	-9.48051
GCF_003101015.1	s__actinobacillus_a porcitonsillarum	g__actinobacillus_a	f__pasteurellaceae	o__enterobacterales	c__gammaproteobacteria	p__proteobacteria	d__bacteria	TRUE	TRUE	1.3e-09	TRUE	1	GATCACCTCCTTACC	AATACCCTTAGGGGGTATCTTTGA	-9.48051
GCF_009910365.1	s__aequoribacter fuscus	g__aequoribacter	f__halieaceae	o__pseudomonadales	c__gammaproteobacteria	p__proteobacteria	d__bacteria	TRUE	TRUE	3.1e-08	TRUE	1	GATCACCTCCTTAAA	GACGTGCTCAGGGGGTATCTTTGA	-9.48051
GCF_001543285.1	s__aerococcus viridans	g__aerococcus	f__aerococcaceae	o__lactobacillales	c__bacilli	p__firmicutes	d__bacteria	TRUE	TRUE	1.9e-06	TRUE	1	GATCACCTCCTTTCT	GACAGCTTCAGGGGGTCTCTTTGA	-9.48051
GCF_001543205.1	s__aerococcus urinaeequi	g__aerococcus	f__aerococcaceae	o__lactobacillales	c__bacilli	p__firmicutes	d__bacteria	TRUE	TRUE	1.9e-06	TRUE	1	GATCACCTCCTTTCT	GACAGCTTCAGGGGGTCTCTTTGA	-9.48051
GCF_001543145.1	s__aerococcus sanguinicola	g__aerococcus	f__aerococcaceae	o__lactobacillales	c__bacilli	p__firmicutes	d__bacteria	TRUE	TRUE	0.0012	TRUE	1	GATCACCTCCTTTCT	GAAAGCTTCAGGGGGTCTCTTTGA	-9.48051
GCF_001543245.1	s__aerococcus urinaehominis	g__aerococcus	f__aerococcaceae	o__lactobacillales	c__bacilli	p__firmicutes	d__bacteria	TRUE	TRUE	3.5e-06	TRUE	1	GATCACCTCCTTTCT	AATAGCTTTAGGGGGTCTCTTTGA	-9.48051
GCF_000014805.1	s__aeromonas hydrophila	g__aeromonas	f__aeromonadaceae	o__enterobacterales	c__gammaproteobacteria	p__proteobacteria	d__bacteria	TRUE	TRUE	1.1e-09	TRUE	1	GATCACCTCCTTACC	GAGCTGCTTAGGGGGTACCTTTGA	-9.48051
GCF_019048265.1	s__aeromonas veronii_a	g__aeromonas	f__aeromonadaceae	o__enterobacterales	c__gammaproteobacteria	p__proteobacteria	d__bacteria	TRUE	TRUE	1.1e-09	TRUE	1	GATCACCTCCTTACC	GAGCTTCTTAGGGGGTACCTTTGA	-9.48051
GCF_900637545.1	s__aeromonas encheleia	g__aeromonas	f__aeromonadaceae	o__enterobacterales	c__gammaproteobacteria	p__proteobacteria	d__bacteria	TRUE	TRUE	1.1e-09	TRUE	1	GATCACCTCCTTACC	GAGCTGCTTAGGGGGTACCTTTGA	-9.48051
GCF_003967035.1	s__aerosticca soli	g__aerosticca	f__rhodanobacteraceae	o__xanthomonadales	c__gammaproteobacteria	p__proteobacteria	d__bacteria	TRUE	TRUE	6.9e-09	TRUE	1	GATCACCTCCTTTCG	GAGTCGCTTAGGGGGTATCTTTGA	-9.48051
GCF_002157225.2	s__agarilytica rhodophyticola	g__agarilytica	f__cellvibrionaceae	o__pseudomonadales	c__gammaproteobacteria	p__proteobacteria	d__bacteria	TRUE	TRUE	5.8e-07	TRUE	1	GATCACCTCCTTAAC	GACGTGCTTAGGGGGTATCTTTGA	-9.48051
GCF_003015185.1	s__ahniella affigens	g__ahniella	f__ahniellaceae	o__xanthomonadales	c__gammaproteobacteria	p__proteobacteria	d__bacteria	TRUE	TRUE	2.7e-09	TRUE	1	GATCACCTCCTTTAG	GCGTCGCTCAGGGGGTATCTTTGA	-9.48051
GCF_000009365.1	s__alcanivorax borkumensis	g__alcanivorax	f__alcanivoracaceae	o__pseudomonadales	c__gammaproteobacteria	p__proteobacteria	d__bacteria	TRUE	TRUE	1.9e-08	TRUE	1	GATCACCTCCTTAAC	GAAGCGCTCAGGGGGTATCTTTGA	-9.48051
GCF_000300005.1	s__alcanivorax dieselolei	g__alcanivorax	f__alcanivoracaceae	o__pseudomonadales	c__gammaproteobacteria	p__proteobacteria	d__bacteria	TRUE	TRUE	1.1e-08	TRUE	1	GATCACCTCCTTAAC	GAAGCGCTTAGGGGGTATCTTTGA	-9.48051
GCF_000299335.2	s__alcanivorax_a pacificus	g__alcanivorax_a	f__alcanivoracaceae	o__pseudomonadales	c__gammaproteobacteria	p__proteobacteria	d__bacteria	TRUE	TRUE	9.6e-10	TRUE	1	GATCACCTCCTTAAC	GACGCGCTCAGGGGGTATCTTTGA	-9.48051
GCF_003063625.1	s__algibacillus sp003063625	g__algibacillus	f__alteromonadaceae	o__enterobacterales	c__gammaproteobacteria	p__proteobacteria	d__bacteria	TRUE	TRUE	7.8e-09	TRUE	1	GATCACCTCCTTACC	GAAGTGCTTAGGGGGTATCTTTGA	-9.48051
GCF_006965545.2	s__alkalicoccus sp006965545	g__alkalicoccus	f__salisediminibacteriaceae	o__bacillales_h	c__bacilli	p__firmicutes	d__bacteria	TRUE	TRUE	5.7e-06	TRUE	1	GATCACCTCCTTTCT	GATGAGTTTAGGGGGTCTCTTTGA	-9.48051
GCF_000014785.1	s__alkalilimnicola ehrlichii	g__alkalilimnicola	f__halorhodospiraceae	o__nitrococcales	c__gammaproteobacteria	p__proteobacteria	d__bacteria	TRUE	TRUE	1.2e-09	TRUE	1	GATCACCTCCTTTAA	GAGGCCCTTAGGGGGTATCTTTGA	-9.48051
GCF_000025485.1	s__allochromatium vinosum	g__allochromatium	f__chromatiaceae	o__chromatiales	c__gammaproteobacteria	p__proteobacteria	d__bacteria	TRUE	TRUE	1.7e-07	TRUE	1	GATCACCTCCTTAAA	GAGTCCCTCAGGGGGTATCTTTGA	-9.48051
GCF_003429285.1	s__alteromonas sediminis	g__alteromonas	f__alteromonadaceae	o__enterobacterales	c__gammaproteobacteria	p__proteobacteria	d__bacteria	TRUE	TRUE	1.1e-09	TRUE	1	GATCACCTCCTTACC	GAATCCCTTAGGGGGTATCTTTGA	-9.48051
GCF_015644725.1	s__alteromonas sp015644725	g__alteromonas	f__alteromonadaceae	o__enterobacterales	c__gammaproteobacteria	p__proteobacteria	d__bacteria	TRUE	TRUE	2e-08	TRUE	1	GATCACCTCCTTACC	GAAGCGCTTAGGGGGTATCTTTGA	-9.48051
GCF_016756315.1	s__alteromonas sp009811495	g__alteromonas	f__alteromonadaceae	o__enterobacterales	c__gammaproteobacteria	p__proteobacteria	d__bacteria	TRUE	TRUE	8.3e-10	TRUE	1	GATCACCTCCTTACC	GAAGCGCTTAGGGGGTATCTTTGA	-9.48051
GCF_005222225.1	s__alteromonas lutimaris	g__alteromonas	f__alteromonadaceae	o__enterobacterales	c__gammaproteobacteria	p__proteobacteria	d__bacteria	TRUE	TRUE	5.5e-08	TRUE	1	GATCACCTCCTTACC	GAAGCCCTTAGGGGGTATCTTTGA	-9.48051
GCF_000213655.1	s__alteromonas naphthalenivorans	g__alteromonas	f__alteromonadaceae	o__enterobacterales	c__gammaproteobacteria	p__proteobacteria	d__bacteria	TRUE	TRUE	4.3e-09	TRUE	1	GATCACCTCCTTACC	GACGCGCTTAGGGGGTATCTTTGA	-9.48051
GCF_006228385.1	s__alteromonas iocasae	g__alteromonas	f__alteromonadaceae	o__enterobacterales	c__gammaproteobacteria	p__proteobacteria	d__bacteria	TRUE	TRUE	3.9e-09	TRUE	1	GATCACCTCCTTACC	GAGGCACTTAGGGGGTATCTTTGA	-9.48051
GCF_003584565.2	s__alteromonas sp002729795	g__alteromonas	f__alteromonadaceae	o__enterobacterales	c__gammaproteobacteria	p__proteobacteria	d__bacteria	TRUE	TRUE	3.1e-07	TRUE	1	GATCACCTCCTTACC	GAAGCACTTAGGGGGTATCTTTGA	-9.48051
GCF_003443615.1	s__alteromonas sp003443615	g__alteromonas	f__alteromonadaceae	o__enterobacterales	c__gammaproteobacteria	p__proteobacteria	d__bacteria	TRUE	TRUE	8.3e-10	TRUE	1	GATCACCTCCTTACC	GAAGCGCTTAGGGGGTATCTTTGA	-9.48051
GCF_002499975.2	s__alteromonas pelagimontana	g__alteromonas	f__alteromonadaceae	o__enterobacterales	c__gammaproteobacteria	p__proteobacteria	d__bacteria	TRUE	TRUE	5.2e-06	TRUE	1	GATCACCTCCTTACC	GAAGCGCTTAGGGGGTATCTTTGA	-9.48051
GCF_000307165.1	s__amphibacillus xylanus	g__amphibacillus	f__amphibacillaceae	o__bacillales_d	c__bacilli	p__firmicutes	d__bacteria	TRUE	TRUE	2.3e-08	TRUE	1	GATCACCTCCTTTCT	GACGAATTTAGGGGGTCTCTTTGA	-9.48051
GCF_001936335.1	s__amylolactobacillus amylophilus	g__amylolactobacillus	f__lactobacillaceae	o__lactobacillales	c__bacilli	p__firmicutes	d__bacteria	TRUE	TRUE	3e-06	TRUE	1	GATCACCTCCTTTCT	AAACACTTTAGGGGGTCTCTTTGA	-9.48051
GCF_001866075.3	s__anaerobacillus isosaccharinicus	g__anaerobacillus	f__anaerobacillaceae	o__bacillales_h	c__bacilli	p__firmicutes	d__bacteria	TRUE	TRUE	1e-07	TRUE	1	GATCACCTCCTTTCT	GCGGACTTTAGGGGGTCCCTTTGA	-9.48051
GCF_009818105.1	s__anaerobacillus_a sp009818105	g__anaerobacillus_a	f__hb172195	o__bacillales_g	c__bacilli	p__firmicutes	d__bacteria	TRUE	TRUE	4.9e-07	TRUE	1	GATCACCTCCTTTCT	AATGATTTTAGGGGGTCTCTTTGA	-9.48051
GCF_002355375.1	s__aneurinibacillus soli	g__aneurinibacillus	f__aneurinibacillaceae	o__aneurinibacillales	c__bacilli	p__firmicutes	d__bacteria	TRUE	TRUE	0.0018	TRUE	1	GATCACCTCCTTTCT	ACGGAAATTAGGGGGTCTCTTTGA	-9.48051
GCF_001187595.1	s__anoxybacillus gonensis	g__anoxybacillus	f__anoxybacillaceae	o__bacillales	c__bacilli	p__firmicutes	d__bacteria	TRUE	TRUE	1e-08	TRUE	1	GATCACCTCCTTTCT	GCGGATATTAGGGGGTCTCTTTGA	-9.48051
GCF_002197485.1	s__anoxybacillus flavithermus_g	g__anoxybacillus	f__anoxybacillaceae	o__bacillales	c__bacilli	p__firmicutes	d__bacteria	TRUE	TRUE	1.1e-07	TRUE	1	GATCACCTCCTTTCT	GTGGATATTAGGGGGTCTCTTTGA	-9.48051
GCF_001634285.1	s__anoxybacillus_a amylolyticus	g__anoxybacillus_a	f__anoxybacillaceae	o__bacillales	c__bacilli	p__firmicutes	d__bacteria	TRUE	TRUE	3.2e-08	TRUE	1	GATCACCTCCTTTCT	GCGGATATTAGGGGGTCTCTTTGA	-9.48051
GCF_003627035.1	s__apilactobacillus bombintestini	g__apilactobacillus	f__lactobacillaceae	o__lactobacillales	c__bacilli	p__firmicutes	d__bacteria	TRUE	TRUE	4.9e-05	TRUE	1	GATCACCTCCTTTCT	AATGGCTTTAGGGGGTCTCTTTGA	-9.48051
GCF_003351745.1	s__aquirhabdus parva	g__aquirhabdus	f__moraxellaceae	o__pseudomonadales	c__gammaproteobacteria	p__proteobacteria	d__bacteria	TRUE	TRUE	5.5e-08	TRUE	1	GATCACCTCCTTAAC	ACCACGCTTAGGGGGTATCTTTGA	-9.48051
GCF_012044895.1	s__aquisalimonas sp012044895	g__aquisalimonas	f__aquisalimonadaceae	o__nitrococcales	c__gammaproteobacteria	p__proteobacteria	d__bacteria	TRUE	TRUE	7e-08	TRUE	1	GATCACCTCCTTTAA	GAAGCGCTTAGGGGGTATCTTTGA	-9.48051
GCF_002847015.1	s__atcc-39006 sp002847015	g__atcc-39006	f__enterobacteriaceae	o__enterobacterales	c__gammaproteobacteria	p__proteobacteria	d__bacteria	TRUE	TRUE	3.2e-08	TRUE	1	GATCACCTCCTTACC	GCCGTCCTTAGGGGGTATCTTTGA	-9.48051
GCF_000009045.1	s__bacillus subtilis	g__bacillus	f__bacillaceae	o__bacillales	c__bacilli	p__firmicutes	d__bacteria	TRUE	TRUE	7.8e-09	TRUE	1	GATCACCTCCTTTCT	GCGGACTTTAGGGGGTCTCTTTGA	-9.48051
GCF_000011645.1	s__bacillus licheniformis	g__bacillus	f__bacillaceae	o__bacillales	c__bacilli	p__firmicutes	d__bacteria	TRUE	TRUE	7.4e-09	TRUE	1	GATCACCTCCTTTCT	GCGGACTTCAGGGGGTCTCTTTGA	-9.48051
GCF_000227465.1	s__bacillus spizizenii	g__bacillus	f__bacillaceae	o__bacillales	c__bacilli	p__firmicutes	d__bacteria	TRUE	TRUE	7.8e-09	TRUE	1	GATCACCTCCTTTCT	GCGGACTTTAGGGGGTCTCTTTGA	-9.48051
GCF_000196735.1	s__bacillus amyloliquefaciens	g__bacillus	f__bacillaceae	o__bacillales	c__bacilli	p__firmicutes	d__bacteria	TRUE	TRUE	7.8e-09	TRUE	1	GATCACCTCCTTTCT	GCGGACTTCAGGGGGTCTCTTTGA	-9.48051
GCF_900186955.1	s__bacillus pumilus	g__bacillus	f__bacillaceae	o__bacillales	c__bacilli	p__firmicutes	d__bacteria	TRUE	TRUE	5e-09	TRUE	1	GATCACCTCCTTTCT	GCTGATTTTAGGGGGTCTCTTTGA	-9.48051
GCF_004116955.1	s__bacillus vallismortis	g__bacillus	f__bacillaceae	o__bacillales	c__bacilli	p__firmicutes	d__bacteria	TRUE	TRUE	7.8e-09	TRUE	1	GATCACCTCCTTTCT	GCGGACTTTAGGGGGTCTCTTTGA	-9.48051
GCF_003431975.1	s__bacillus pumilus_n	g__bacillus	f__bacillaceae	o__bacillales	c__bacilli	p__firmicutes	d__bacteria	TRUE	TRUE	5e-09	TRUE	1	GATCACCTCCTTTCT	GCTGATTTTAGGGGGTCTCTTTGA	-9.48051
GCF_000021305.1	s__bacillus_a thuringiensis_s	g__bacillus_a	f__bacillaceae_g	o__bacillales	c__bacilli	p__firmicutes	d__bacteria	TRUE	TRUE	1.6e-08	TRUE	1	GATCACCTCCTTTCT	GCGGCTTTTAGGGGGTCTCTTTGA	-9.48051
GCF_000832605.1	s__bacillus_a mycoides	g__bacillus_a	f__bacillaceae_g	o__bacillales	c__bacilli	p__firmicutes	d__bacteria	TRUE	TRUE	1.6e-08	TRUE	1	GATCACCTCCTTTCT	GCGGCTTTTAGGGGGTCTCTTTGA	-9.48051
GCA_018966865.1	s__bacillus_a sp018966865	g__bacillus_a	f__bacillaceae_g	o__bacillales	c__bacilli	p__firmicutes	d__bacteria	TRUE	TRUE	1.6e-08	TRUE	1	GATCACCTCCTTTCT	GCGGCTTTTAGGGGGTCTCTTTGA	-9.48051
GCF_000742895.1	s__bacillus_a anthracis	g__bacillus_a	f__bacillaceae_g	o__bacillales	c__bacilli	p__firmicutes	d__bacteria	TRUE	TRUE	1.6e-08	TRUE	1	GATCACCTCCTTTCT	GCGGCTTTTAGGGGGTCTCTTTGA	-9.48051
GCF_006384875.1	s__bacillus_a bombysepticus	g__bacillus_a	f__bacillaceae_g	o__bacillales	c__bacilli	p__firmicutes	d__bacteria	TRUE	TRUE	1.6e-08	TRUE	1	GATCACCTCCTTTCT	GCGGCTTTTAGGGGGTCTCTTTGA	-9.48051
GCF_000496285.1	s__bacillus_a toyonensis	g__bacillus_a	f__bacillaceae_g	o__bacillales	c__bacilli	p__firmicutes	d__bacteria	TRUE	TRUE	1.6e-08	TRUE	1	GATCACCTCCTTTCT	GCGGCTTTTAGGGGGTCTCTTTGA	-9.48051
GCF_000007825.1	s__bacillus_a cereus	g__bacillus_a	f__bacillaceae_g	o__bacillales	c__bacilli	p__firmicutes	d__bacteria	TRUE	TRUE	1.6e-08	TRUE	1	GATCACCTCCTTTCT	GCGGCTTTTAGGGGGTCTCTTTGA	-9.48051
GCF_018742245.1	s__bacillus_a cereus_u	g__bacillus_a	f__bacillaceae_g	o__bacillales	c__bacilli	p__firmicutes	d__bacteria	TRUE	TRUE	1.6e-08	TRUE	1	GATCACCTCCTTTCT	GCGGCTTTTAGGGGGTCTCTTTGA	-9.48051
GCF_002119445.1	s__bacillus_a thuringiensis	g__bacillus_a	f__bacillaceae_g	o__bacillales	c__bacilli	p__firmicutes	d__bacteria	TRUE	TRUE	1.6e-08	TRUE	1	GATCACCTCCTTTCT	GCGGCTTTTAGGGGGTCTCTTTGA	-9.48051
GCF_000017425.1	s__bacillus_a cytotoxicus	g__bacillus_a	f__bacillaceae_g	o__bacillales	c__bacilli	p__firmicutes	d__bacteria	TRUE	TRUE	1.6e-08	TRUE	1	GATCACCTCCTTTCT	GCGGCTTTTAGGGGGTCTCTTTGA	-9.48051
GCF_000473245.1	s__bacillus_ab infantis	g__bacillus_ab	f__dsm-18226	o__bacillales_b	c__bacilli	p__firmicutes	d__bacteria	TRUE	TRUE	6.1e-05	TRUE	1	GATCACCTCCTTTCT	GCGGACTTTAGGGGGTCTCTTTGA	-9.48051
GCF_000242895.2	s__bacillus_bu sp000242895	g__bacillus_bu	f__dsm-18226	o__bacillales_b	c__bacilli	p__firmicutes	d__bacteria	TRUE	TRUE	2.4e-05	TRUE	1	GATCACCTCCTTTCT	GCGGGCTTTAGGGGGTCTCTTTGA	-9.48051
GCF_002250115.1	s__bacillus_h clausii	g__bacillus_h	f__bacillaceae_d	o__bacillales_h	c__bacilli	p__firmicutes	d__bacteria	TRUE	TRUE	1.4e-07	TRUE	1	GATCACCTCCTTTCT	TCTGATTTTAGGGGGTCTCTTTGA	-9.48051
GCF_002109385.1	s__bacillus_l krulwichiae	g__bacillus_l	f__bacillaceae_d	o__bacillales_h	c__bacilli	p__firmicutes	d__bacteria	TRUE	TRUE	1.7e-07	TRUE	1	GATCACCTCCTTTCT	AATGAATTTAGGGGGTCTCTTTGA	-9.48051
GCF_001050115.1	s__bacillus_o smithii	g__bacillus_o	f__domibacillaceae	o__bacillales_b	c__bacilli	p__firmicutes	d__bacteria	TRUE	TRUE	9.6e-08	TRUE	1	GATCACCTCCTTTCT	GCGGATTTTAGGGGGTCTCTTTGA	-9.48051
GCF_014235785.1	s__bacillus_p sp002858905	g__bacillus_p	f__bacillaceae	o__bacillales	c__bacilli	p__firmicutes	d__bacteria	TRUE	TRUE	3.7e-08	TRUE	1	GATCACCTCCTTTCT	GCGGCTTTTAGGGGGTCTCTTTGA	-9.48051
GCF_000005825.2	s__bacillus_s pseudofirmus	g__bacillus_s	f__bacillaceae_d	o__bacillales_h	c__bacilli	p__firmicutes	d__bacteria	TRUE	TRUE	5.5e-08	TRUE	1	GATCACCTCCTTTCT	ACAGACTTTAGGGGGTCTCTTTGA	-9.48051
GCF_000724485.1	s__bacillus_z methanolicus_a	g__bacillus_z	f__dsm-18226	o__bacillales_b	c__bacilli	p__firmicutes	d__bacteria	TRUE	TRUE	6.7e-07	TRUE	1	GATCACCTCCTTTCT	GCGGACTTTAGGGGGTCTCTTTGA	-9.48051
GCF_000743945.1	s__basilea psittacipulmonis	g__basilea	f__burkholderiaceae	o__burkholderiales	c__gammaproteobacteria	p__proteobacteria	d__bacteria	TRUE	TRUE	7.8e-06	TRUE	1	GATCACCTCCTTTAA	CAAGCTCTTAGGGGGTATCTTTGA	-9.48051
GCF_012295615.1	s__bermanella marisrubri	g__bermanella	f__dsm-6294	o__pseudomonadales	c__gammaproteobacteria	p__proteobacteria	d__bacteria	TRUE	TRUE	1.7e-07	TRUE	1	GATCACCTCCTTAAA	GAGATGCTTAGGGGGTATCTTTGA	-9.48051
GCF_013377195.1	s__bisgaardia hudsonensis	g__bisgaardia	f__pasteurellaceae	o__enterobacterales	c__gammaproteobacteria	p__proteobacteria	d__bacteria	TRUE	TRUE	3.7e-10	TRUE	1	GATCACCTCCTTACC	ACTGTGCTTAGGGGGTATCTTTGA	-9.48051
GCF_005484965.1	s__brenneria nigrifluens	g__brenneria	f__enterobacteriaceae	o__enterobacterales	c__gammaproteobacteria	p__proteobacteria	d__bacteria	TRUE	TRUE	3.4e-10	TRUE	1	GATCACCTCCTTAAA	GCCGTCCTTAGGGGGTATCTTTGA	-9.48051
GCF_002291445.1	s__brenneria goodwinii	g__brenneria	f__enterobacteriaceae	o__enterobacterales	c__gammaproteobacteria	p__proteobacteria	d__bacteria	TRUE	TRUE	3.4e-10	TRUE	1	GATCACCTCCTTACC	GCCGTCCTTAGGGGGTATCTTTGA	-9.48051
GCF_005484945.1	s__brenneria rubrifaciens	g__brenneria	f__enterobacteriaceae	o__enterobacterales	c__gammaproteobacteria	p__proteobacteria	d__bacteria	TRUE	TRUE	3.4e-10	TRUE	1	GATCACCTCCTTACC	GCCGTCCTTAGGGGGTATCTTTGA	-9.48051
GCF_017569925.1	s__brenneria izadpanahii	g__brenneria	f__enterobacteriaceae	o__enterobacterales	c__gammaproteobacteria	p__proteobacteria	d__bacteria	TRUE	TRUE	3.4e-10	TRUE	1	GATCACCTCCTTACC	GCCGTCCTTAGGGGGTATCTTTGA	-9.48051
GCF_004117055.1	s__brevibacillus agri	g__brevibacillus	f__brevibacillaceae	o__brevibacillales	c__bacilli	p__firmicutes	d__bacteria	TRUE	TRUE	4.2e-06	TRUE	1	GATCACCTCCTTTCT	GCGGATATCAGGGGGTCTCTTTGA	-9.48051
GCF_016811915.1	s__brevibacillus choshinensis_a	g__brevibacillus	f__brevibacillaceae	o__brevibacillales	c__bacilli	p__firmicutes	d__bacteria	TRUE	TRUE	1.2e-06	TRUE	1	GATCACCTCCTTTCT	GCAGATATCAGGGGGTCTCTTTGA	-9.48051
GCF_900637055.1	s__brevibacillus brevis	g__brevibacillus	f__brevibacillaceae	o__brevibacillales	c__bacilli	p__firmicutes	d__bacteria	TRUE	TRUE	1.2e-06	TRUE	1	GATCACCTCCTTTCT	GCGGATATCAGGGGGTCTCTTTGA	-9.48051
GCF_000010165.1	s__brevibacillus brevis_d	g__brevibacillus	f__brevibacillaceae	o__brevibacillales	c__bacilli	p__firmicutes	d__bacteria	TRUE	TRUE	1.2e-06	TRUE	1	GATCACCTCCTTTCT	GCGGATATCAGGGGGTCTCTTTGA	-9.48051
GCF_001039275.2	s__brevibacillus brevis_c	g__brevibacillus	f__brevibacillaceae	o__brevibacillales	c__bacilli	p__firmicutes	d__bacteria	TRUE	TRUE	1.2e-06	TRUE	1	GATCACCTCCTTTCT	GCGGATATTAGGGGGTCTCTTTGA	-9.48051
GCF_018228725.1	s__brevibacillus sp018228725	g__brevibacillus	f__brevibacillaceae	o__brevibacillales	c__bacilli	p__firmicutes	d__bacteria	TRUE	TRUE	1.2e-06	TRUE	1	GATCACCTCCTTTCT	GCGGATATCAGGGGGTCTCTTTGA	-9.48051
GCF_002706795.1	s__brevibacillus_b laterosporus	g__brevibacillus_b	f__brevibacillaceae	o__brevibacillales	c__bacilli	p__firmicutes	d__bacteria	TRUE	TRUE	3.6e-06	TRUE	1	GATCACCTCCTTTCT	GCGGATATTAGGGGGTCTCTTTGA	-9.48051
GCF_007833815.1	s__brevibacillus_b laterosporus_d	g__brevibacillus_b	f__brevibacillaceae	o__brevibacillales	c__bacilli	p__firmicutes	d__bacteria	TRUE	TRUE	3.6e-06	TRUE	1	GATCACCTCCTTTCT	GCGGATATTAGGGGGTCTCTTTGA	-9.48051
GCF_000219535.2	s__brevibacillus_b halotolerans	g__brevibacillus_b	f__brevibacillaceae	o__brevibacillales	c__bacilli	p__firmicutes	d__bacteria	TRUE	TRUE	4.5e-06	TRUE	1	GATCACCTCCTTTCT	ACGGATATTAGGGGGTCTCTTTGA	-9.48051
GCF_011290485.1	s__caldichromatium japonicum	g__caldichromatium	f__chromatiaceae	o__chromatiales	c__gammaproteobacteria	p__proteobacteria	d__bacteria	TRUE	TRUE	2.4e-09	TRUE	1	GATCACCTCCTTACA	GAGTCCCTCAGGGGGTATCTTTAA	-9.48051
GCF_900637305.1	s__cardiobacterium hominis	g__cardiobacterium	f__cardiobacteriaceae	o__cardiobacteriales	c__gammaproteobacteria	p__proteobacteria	d__bacteria	TRUE	TRUE	1.3e-06	TRUE	1	GATCACCTCCTTTAA	GCGGCGCTTAGGGGGTATCTTTGA	-9.48051
GCF_007289895.1	s__catenovulum sediminis	g__catenovulum	f__alteromonadaceae	o__enterobacterales	c__gammaproteobacteria	p__proteobacteria	d__bacteria	TRUE	TRUE	1.3e-10	TRUE	1	GATCACCTCCTTAAC	GAGCTGCTTAGGGGGTATCTTTGA	-9.48051
GCF_000758325.1	s__cedecea neteri_b	g__cedecea	f__enterobacteriaceae	o__enterobacterales	c__gammaproteobacteria	p__proteobacteria	d__bacteria	TRUE	TRUE	2.7e-09	TRUE	1	GATCACCTCCTTACC	GACGTTCTTAGGGGGTATCTTTGA	-9.48051
GCF_000758305.1	s__cedecea neteri_c	g__cedecea	f__enterobacteriaceae	o__enterobacterales	c__gammaproteobacteria	p__proteobacteria	d__bacteria	TRUE	TRUE	2.7e-09	TRUE	1	GATCACCTCCTTACC	GACGTTCTTAGGGGGTATCTTTGA	-9.48051
GCF_900635955.1	s__cedecea lapagei	g__cedecea	f__enterobacteriaceae	o__enterobacterales	c__gammaproteobacteria	p__proteobacteria	d__bacteria	TRUE	TRUE	2.7e-09	TRUE	1	GATCACCTCCTTACC	GACGTTCTTAGGGGGTATCTTTGA	-9.48051
GCF_000757825.1	s__cedecea neteri_a	g__cedecea	f__enterobacteriaceae	o__enterobacterales	c__gammaproteobacteria	p__proteobacteria	d__bacteria	TRUE	TRUE	2.7e-09	TRUE	1	GATCACCTCCTTACC	GACGTTCTTAGGGGGTATCTTTGA	-9.48051
GCF_008806975.1	s__cellvibrio sp008806975	g__cellvibrio	f__cellvibrionaceae	o__pseudomonadales	c__gammaproteobacteria	p__proteobacteria	d__bacteria	TRUE	TRUE	6e-09	TRUE	1	GATCACCTCCTTAAA	GATGTGCTTAGGGGGTATCTTTGA	-9.48051
GCF_008806955.1	s__cellvibrio sp000263355	g__cellvibrio	f__cellvibrionaceae	o__pseudomonadales	c__gammaproteobacteria	p__proteobacteria	d__bacteria	TRUE	TRUE	7.4e-09	TRUE	1	GATCACCTCCTTAAA	AATGTGCTTAGGGGGTATCTTTGA	-9.48051
GCF_002162135.1	s__cellvibrio sp002162135	g__cellvibrio	f__cellvibrionaceae	o__pseudomonadales	c__gammaproteobacteria	p__proteobacteria	d__bacteria	TRUE	TRUE	1.7e-08	TRUE	1	GATCACCTCCTTAAA	CGTGTGCTTAGGGGGTATCTTTGA	-9.48051
GCF_000019225.1	s__cellvibrio japonicus	g__cellvibrio	f__cellvibrionaceae	o__pseudomonadales	c__gammaproteobacteria	p__proteobacteria	d__bacteria	TRUE	TRUE	3.5e-09	TRUE	1	GATCACCTCCTTAAA	CAGGTGCTTAGGGGGTATCTTTGA	-9.48051
GCF_002007605.1	s__cellvibrio sp002007605	g__cellvibrio	f__cellvibrionaceae	o__pseudomonadales	c__gammaproteobacteria	p__proteobacteria	d__bacteria	TRUE	TRUE	5.1e-09	TRUE	1	GATCACCTCCTTAAA	AATGTGCTCAGGGGGTATCTTTGA	-9.48051
GCF_000520015.2	s__chania multitudinisentens	g__chania	f__enterobacteriaceae	o__enterobacterales	c__gammaproteobacteria	p__proteobacteria	d__bacteria	TRUE	TRUE	3.4e-10	TRUE	1	GATCACCTCCTTACC	GCCGTTCTTAGGGGGTATCTTTGA	-9.48051
GCF_000227745.2	s__chromatium violascens	g__chromatium	f__chromatiaceae	o__chromatiales	c__gammaproteobacteria	p__proteobacteria	d__bacteria	TRUE	TRUE	8e-09	TRUE	1	GATCACCTCCTTACG	GAGTCCCTCAGGGGGTATCTTTGA	-9.48051
GCF_016811995.1	s__citrobacter sp016811995	g__citrobacter	f__enterobacteriaceae	o__enterobacterales	c__gammaproteobacteria	p__proteobacteria	d__bacteria	TRUE	TRUE	1.6e-09	TRUE	1	GATCACCTCCTTACC	GACGTTCTTAGGGGGTATCTTTGA	-9.48051
GCF_004353845.1	s__citrobacter freundii_e	g__citrobacter	f__enterobacteriaceae	o__enterobacterales	c__gammaproteobacteria	p__proteobacteria	d__bacteria	TRUE	TRUE	1.6e-09	TRUE	1	GATCACCTCCTTACC	GACGTTCTTAGGGGGTATCTTTGA	-9.48051
GCF_004684345.1	s__citrobacter tructae	g__citrobacter	f__enterobacteriaceae	o__enterobacterales	c__gammaproteobacteria	p__proteobacteria	d__bacteria	TRUE	TRUE	1e-09	TRUE	1	GATCACCTCCTTACC	GACGTTCTTAGGGGGTATCTTTGA	-9.48051
GCF_011064845.1	s__citrobacter freundii	g__citrobacter	f__enterobacteriaceae	o__enterobacterales	c__gammaproteobacteria	p__proteobacteria	d__bacteria	TRUE	TRUE	1.6e-09	TRUE	1	GATCACCTCCTTACC	GACGTTCTTAGGGGGTATCTTTGA	-9.48051
GCF_013836145.1	s__citrobacter_a sp013836145	g__citrobacter_a	f__enterobacteriaceae	o__enterobacterales	c__gammaproteobacteria	p__proteobacteria	d__bacteria	TRUE	TRUE	8.3e-10	TRUE	1	GATCACCTCCTTACC	AACGTTCTTAGGGGGTATCTTTGA	-9.48051
GCF_019048065.1	s__citrobacter_a farmeri	g__citrobacter_a	f__enterobacteriaceae	o__enterobacterales	c__gammaproteobacteria	p__proteobacteria	d__bacteria	TRUE	TRUE	6.8e-10	TRUE	1	GATCACCTCCTTACC	GACGTTCTTAGGGGGTATCTTTGA	-9.48051
GCF_000981805.1	s__citrobacter_a amalonaticus_c	g__citrobacter_a	f__enterobacteriaceae	o__enterobacterales	c__gammaproteobacteria	p__proteobacteria	d__bacteria	TRUE	TRUE	6.8e-10	TRUE	1	GATCACCTCCTTACC	GACGTTCTTAGGGGGTATCTTTGA	-9.48051
GCF_014107495.1	s__cohnella sp014107495	g__cohnella	f__paenibacillaceae	o__paenibacillales	c__bacilli	p__firmicutes	d__bacteria	TRUE	TRUE	0.01	TRUE	1	GATCACCTCCTTTCT	CAGCAACTCAGGGGGTCTCTTTGA	-9.48051
GCF_012849095.1	s__cohnella sp012849095	g__cohnella	f__paenibacillaceae	o__paenibacillales	c__bacilli	p__firmicutes	d__bacteria	TRUE	TRUE	0.019	TRUE	1	GATCACCTCCTTTCT	CAGCAACTCAGGGGGTCCCTTTGA	-9.48051
GCF_003713065.1	s__cohnella candidum	g__cohnella	f__paenibacillaceae	o__paenibacillales	c__bacilli	p__firmicutes	d__bacteria	TRUE	TRUE	0.013	TRUE	1	GATCACCTCCTTTCT	CAGCAACTTAGGGGGTCTCTTTGA	-9.48051
GCF_004295585.1	s__cohnella abietis	g__cohnella	f__paenibacillaceae	o__paenibacillales	c__bacilli	p__firmicutes	d__bacteria	TRUE	TRUE	0.01	TRUE	1	GATCACCTCCTTTCT	CAGCAACTCAGGGGGTCTCTTTGA	-9.48051
GCF_003606365.2	s__companilactobacillus zhachilii	g__companilactobacillus	f__lactobacillaceae	o__lactobacillales	c__bacilli	p__firmicutes	d__bacteria	TRUE	TRUE	7.5e-08	TRUE	1	GATCACCTCCTTTCT	AAGCAGTTCAGGGGGTCTCTTTGA	-9.48051
GCF_000831645.3	s__companilactobacillus heilongjiangensis	g__companilactobacillus	f__lactobacillaceae	o__lactobacillales	c__bacilli	p__firmicutes	d__bacteria	TRUE	TRUE	1.1e-07	TRUE	1	GATCACCTCCTTTCT	ACTCAATTCAGGGGGTCTCTTTGA	-9.48051
GCF_014058425.1	s__companilactobacillus pabuli	g__companilactobacillus	f__lactobacillaceae	o__lactobacillales	c__bacilli	p__firmicutes	d__bacteria	TRUE	TRUE	3.6e-07	TRUE	1	GATCACCTCCTTTCT	AAGCAGTTCAGGGGGTCTCTTTGA	-9.48051
GCF_002849895.1	s__companilactobacillus alimentarius	g__companilactobacillus	f__lactobacillaceae	o__lactobacillales	c__bacilli	p__firmicutes	d__bacteria	TRUE	TRUE	8.5e-08	TRUE	1	GATCACCTCCTTTCT	AGTCAATTCAGGGGGTCTCTTTGA	-9.48051
GCF_001971585.1	s__companilactobacillus allii	g__companilactobacillus	f__lactobacillaceae	o__lactobacillales	c__bacilli	p__firmicutes	d__bacteria	TRUE	TRUE	8.5e-07	TRUE	1	GATCACCTCCTTTCT	AGTCAATTCAGGGGGTCTCTTTGA	-9.48051
GCF_002706745.1	s__companilactobacillus farciminis	g__companilactobacillus	f__lactobacillaceae	o__lactobacillales	c__bacilli	p__firmicutes	d__bacteria	TRUE	TRUE	3.6e-07	TRUE	1	GATCACCTCCTTTCT	AAGCAGTTCAGGGGGTCTCTTTGA	-9.48051
GCF_001277255.1	s__cronobacter condimenti	g__cronobacter	f__enterobacteriaceae	o__enterobacterales	c__gammaproteobacteria	p__proteobacteria	d__bacteria	TRUE	TRUE	6.8e-10	TRUE	1	GATCACCTCCTTACC	GACGTTCTTAGGGGGTATCTTTGA	-9.48051
GCF_001277215.2	s__cronobacter malonaticus	g__cronobacter	f__enterobacteriaceae	o__enterobacterales	c__gammaproteobacteria	p__proteobacteria	d__bacteria	TRUE	TRUE	6.8e-10	TRUE	1	GATCACCTCCTTACC	GACGTTCTTAGGGGGTATCTTTGA	-9.48051
GCF_000982825.1	s__cronobacter sakazakii	g__cronobacter	f__enterobacteriaceae	o__enterobacterales	c__gammaproteobacteria	p__proteobacteria	d__bacteria	TRUE	TRUE	6.8e-10	TRUE	1	GATCACCTCCTTACC	GACGTTCTTAGGGGGTATCTTTGA	-9.48051
GCF_001277175.1	s__cronobacter universalis	g__cronobacter	f__enterobacteriaceae	o__enterobacterales	c__gammaproteobacteria	p__proteobacteria	d__bacteria	TRUE	TRUE	6.8e-10	TRUE	1	GATCACCTCCTTACC	GACGTTCTTAGGGGGTATCTTTGA	-9.48051
GCF_001277235.1	s__cronobacter dublinensis	g__cronobacter	f__enterobacteriaceae	o__enterobacterales	c__gammaproteobacteria	p__proteobacteria	d__bacteria	TRUE	TRUE	6.8e-10	TRUE	1	GATCACCTCCTTACC	GACGTTCTTAGGGGGTATCTTTGA	-9.48051
GCF_001277195.1	s__cronobacter muytjensii	g__cronobacter	f__enterobacteriaceae	o__enterobacterales	c__gammaproteobacteria	p__proteobacteria	d__bacteria	TRUE	TRUE	6.8e-10	TRUE	1	GATCACCTCCTTACC	GACGTTCTTAGGGGGTATCTTTGA	-9.48051
GCF_016132545.1	s__csc3-9 sp016132545	g__csc3-9	f__spongiibacteraceae	o__pseudomonadales	c__gammaproteobacteria	p__proteobacteria	d__bacteria	TRUE	TRUE	1.7e-07	TRUE	1	GATCACCTCCTTAAA	GATACGCTTAGGGGGTATCTTTGA	-9.48051
GCF_000294775.2	s__cytobacillus oceanisediminis_b	g__cytobacillus	f__dsm-18226	o__bacillales_b	c__bacilli	p__firmicutes	d__bacteria	TRUE	TRUE	3.7e-05	TRUE	1	GATCACCTCCTTTCT	GCGGACTTTAGGGGGTCTCTTTGA	-9.48051
GCF_007995155.1	s__cytobacillus dafuensis	g__cytobacillus	f__dsm-18226	o__bacillales_b	c__bacilli	p__firmicutes	d__bacteria	TRUE	TRUE	2e-07	TRUE	1	GATCACCTCCTTTCT	GCGGACTTTAGGGGGTCTCTTTGA	-9.48051
GCF_002276165.1	s__cytobacillus kochii	g__cytobacillus	f__dsm-18226	o__bacillales_b	c__bacilli	p__firmicutes	d__bacteria	TRUE	TRUE	0.00023	TRUE	1	GATCACCTCCTTTCT	GCGGACTTTAGGGGGTCTCTTTGA	-9.48051
GCF_003072645.1	s__dongshaea marina	g__dongshaea	f__aeromonadaceae	o__enterobacterales	c__gammaproteobacteria	p__proteobacteria	d__bacteria	TRUE	TRUE	4.1e-09	TRUE	1	GATCACCTCCTTACC	GCTCTCCTTAGGGGGTACCTTTGA	-9.48051
GCF_014297575.1	s__dyella sp014297575	g__dyella	f__rhodanobacteraceae	o__xanthomonadales	c__gammaproteobacteria	p__proteobacteria	d__bacteria	TRUE	TRUE	2.8e-08	TRUE	1	GATCACCTCCTTTCG	GAGTCGCTTAGGGGGTATCTTTGA	-9.48051
GCF_000725385.1	s__dyella japonica_c	g__dyella	f__rhodanobacteraceae	o__xanthomonadales	c__gammaproteobacteria	p__proteobacteria	d__bacteria	TRUE	TRUE	2.8e-08	TRUE	1	GATCACCTCCTTTCG	GAGTCGCTTAGGGGGTATCTTTGA	-9.48051
GCF_001641285.1	s__dyella_a thiooxydans	g__dyella_a	f__rhodanobacteraceae	o__xanthomonadales	c__gammaproteobacteria	p__proteobacteria	d__bacteria	TRUE	TRUE	2.8e-08	TRUE	1	GATCACCTCCTTTCG	GAGTCGCTTAGGGGGTATCTTTGA	-9.48051
GCF_016865235.1	s__dyella_b caseinilytica	g__dyella_b	f__rhodanobacteraceae	o__xanthomonadales	c__gammaproteobacteria	p__proteobacteria	d__bacteria	TRUE	TRUE	8.3e-09	TRUE	1	GATCACCTCCTTTCG	GAGTCGCTTAGGGGGTATCTTTGA	-9.48051
GCF_004114615.1	s__dyella_b sp004114615	g__dyella_b	f__rhodanobacteraceae	o__xanthomonadales	c__gammaproteobacteria	p__proteobacteria	d__bacteria	TRUE	TRUE	2.9e-09	TRUE	1	GATCACCTCCTTTCG	GAGTCGCTTAGGGGGTATCTTTGA	-9.48051
GCF_016925495.1	s__efpc2 sp016925495	g__efpc2	f__methylococcaceae	o__methylococcales	c__gammaproteobacteria	p__proteobacteria	d__bacteria	TRUE	TRUE	7.4e-08	TRUE	1	GATCACCTCCTTATA	GAAGGGCTCAGGGGGTATCTTTGA	-9.48051
GCF_900324475.1	s__enterobacter bugandensis	g__enterobacter	f__enterobacteriaceae	o__enterobacterales	c__gammaproteobacteria	p__proteobacteria	d__bacteria	TRUE	TRUE	6.8e-10	TRUE	1	GATCACCTCCTTACC	GACGTTCTTAGGGGGTATCTTTGA	-9.48051
GCF_001984825.2	s__enterobacter chengduensis	g__enterobacter	f__enterobacteriaceae	o__enterobacterales	c__gammaproteobacteria	p__proteobacteria	d__bacteria	TRUE	TRUE	6.8e-10	TRUE	1	GATCACCTCCTTACC	GACGTTCTTAGGGGGTATCTTTGA	-9.48051
GCF_001729805.1	s__enterobacter roggenkampii	g__enterobacter	f__enterobacteriaceae	o__enterobacterales	c__gammaproteobacteria	p__proteobacteria	d__bacteria	TRUE	TRUE	6.8e-10	TRUE	1	GATCACCTCCTTACC	GACGTTCTTAGGGGGTATCTTTGA	-9.48051
GCF_009176645.1	s__enterobacter oligotrophicus	g__enterobacter	f__enterobacteriaceae	o__enterobacterales	c__gammaproteobacteria	p__proteobacteria	d__bacteria	TRUE	TRUE	6.8e-10	TRUE	1	GATCACCTCCTTACC	GACGTTCTTAGGGGGTATCTTTGA	-9.48051
GCF_009755685.1	s__enterobacter sp000568095	g__enterobacter	f__enterobacteriaceae	o__enterobacterales	c__gammaproteobacteria	p__proteobacteria	d__bacteria	TRUE	TRUE	6.8e-10	TRUE	1	GATCACCTCCTTACC	GACGTTCTTAGGGGGTATCTTTGA	-9.48051
GCF_001729765.1	s__enterobacter kobei	g__enterobacter	f__enterobacteriaceae	o__enterobacterales	c__gammaproteobacteria	p__proteobacteria	d__bacteria	TRUE	TRUE	6.8e-10	TRUE	1	GATCACCTCCTTACC	GACGTTCTTAGGGGGTATCTTTGA	-9.48051
GCF_001521715.1	s__enterobacter asburiae	g__enterobacter	f__enterobacteriaceae	o__enterobacterales	c__gammaproteobacteria	p__proteobacteria	d__bacteria	TRUE	TRUE	6.8e-10	TRUE	1	GATCACCTCCTTACC	GACGTTCTTAGGGGGTATCTTTGA	-9.48051
GCF_007035645.1	s__enterobacter asburiae_b	g__enterobacter	f__enterobacteriaceae	o__enterobacterales	c__gammaproteobacteria	p__proteobacteria	d__bacteria	TRUE	TRUE	6.8e-10	TRUE	1	GATCACCTCCTTACC	GACGTTCTTAGGGGGTATCTTTGA	-9.48051
GCF_000025565.1	s__enterobacter cloacae	g__enterobacter	f__enterobacteriaceae	o__enterobacterales	c__gammaproteobacteria	p__proteobacteria	d__bacteria	TRUE	TRUE	6.8e-10	TRUE	1	GATCACCTCCTTACC	GACGTTCTTAGGGGGTATCTTTGA	-9.48051
GCF_001729745.1	s__enterobacter hormaechei_a	g__enterobacter	f__enterobacteriaceae	o__enterobacterales	c__gammaproteobacteria	p__proteobacteria	d__bacteria	TRUE	TRUE	6.8e-10	TRUE	1	GATCACCTCCTTACC	GACGTTCTTAGGGGGTATCTTTGA	-9.48051
GCF_002208095.1	s__enterobacter cloacae_m	g__enterobacter	f__enterobacteriaceae	o__enterobacterales	c__gammaproteobacteria	p__proteobacteria	d__bacteria	TRUE	TRUE	6.8e-10	TRUE	1	GATCACCTCCTTACC	GACGTTCTTAGGGGGTATCTTTGA	-9.48051
GCF_900322725.1	s__enterobacter quasihormaechei	g__enterobacter	f__enterobacteriaceae	o__enterobacterales	c__gammaproteobacteria	p__proteobacteria	d__bacteria	TRUE	TRUE	6.8e-10	TRUE	1	GATCACCTCCTTACC	GACGTTCTTAGGGGGTATCTTTGA	-9.48051
GCF_014169315.1	s__enterobacter cloacae_p	g__enterobacter	f__enterobacteriaceae	o__enterobacterales	c__gammaproteobacteria	p__proteobacteria	d__bacteria	TRUE	TRUE	6.8e-10	TRUE	1	GATCACCTCCTTACC	GACGTTCTTAGGGGGTATCTTTGA	-9.48051
GCF_019047785.1	s__enterobacter cancerogenus	g__enterobacter	f__enterobacteriaceae	o__enterobacterales	c__gammaproteobacteria	p__proteobacteria	d__bacteria	TRUE	TRUE	6.8e-10	TRUE	1	GATCACCTCCTTACC	GACGTTCTTAGGGGGTATCTTTGA	-9.48051
GCF_000164865.1	s__enterobacter_b lignolyticus	g__enterobacter_b	f__enterobacteriaceae	o__enterobacterales	c__gammaproteobacteria	p__proteobacteria	d__bacteria	TRUE	TRUE	6.8e-10	TRUE	1	GATCACCTCCTTACC	GACGTTCTTAGGGGGTATCTTTGA	-9.48051
GCF_001888805.2	s__enterobacter_d sp001888805	g__enterobacter_d	f__enterobacteriaceae	o__enterobacterales	c__gammaproteobacteria	p__proteobacteria	d__bacteria	TRUE	TRUE	6.8e-10	TRUE	1	GATCACCTCCTTACC	GACGTTCTTAGGGGGTATCTTTGA	-9.48051
GCF_002197645.1	s__enterococcus wangshanyuanii	g__enterococcus	f__enterococcaceae	o__lactobacillales	c__bacilli	p__firmicutes	d__bacteria	TRUE	TRUE	2.3e-07	TRUE	1	GATCACCTCCTTTCT	ACAAGCTTCAGGGGGTCTCTTTGA	-9.48051
GCF_002813755.1	s__enterococcus_b mundtii	g__enterococcus_b	f__enterococcaceae	o__lactobacillales	c__bacilli	p__firmicutes	d__bacteria	TRUE	TRUE	2.7e-08	TRUE	1	GATCACCTCCTTTCT	ACAAGTTTTAGGGGGTCTCTTTGA	-9.48051
GCF_013394305.1	s__enterococcus_b pernyi	g__enterococcus_b	f__enterococcaceae	o__lactobacillales	c__bacilli	p__firmicutes	d__bacteria	TRUE	TRUE	2.7e-08	TRUE	1	GATCACCTCCTTTCT	ACAAGTTTTAGGGGGTCTCTTTGA	-9.48051
GCF_003957375.1	s__enterococcus_b mundtii_c	g__enterococcus_b	f__enterococcaceae	o__lactobacillales	c__bacilli	p__firmicutes	d__bacteria	TRUE	TRUE	2.7e-08	TRUE	1	GATCACCTCCTTTCT	ACAAGTTTTAGGGGGTCTCTTTGA	-9.48051
GCF_002850555.1	s__enterococcus_d sp002850555	g__enterococcus_d	f__enterococcaceae	o__lactobacillales	c__bacilli	p__firmicutes	d__bacteria	TRUE	TRUE	2.1e-07	TRUE	1	GATCACCTCCTTTCT	ATCAGTTTTAGGGGGTCTCTTTGA	-9.48051
GCF_000026185.1	s__erwinia tasmaniensis	g__erwinia	f__enterobacteriaceae	o__enterobacterales	c__gammaproteobacteria	p__proteobacteria	d__bacteria	TRUE	TRUE	9.5e-10	TRUE	1	GATCACCTCCTTACC	ACCGTGCTCAGGGGGTATCTTTGA	-9.48051
GCF_000196615.1	s__erwinia billingiae	g__erwinia	f__enterobacteriaceae	o__enterobacterales	c__gammaproteobacteria	p__proteobacteria	d__bacteria	TRUE	TRUE	1.2e-09	TRUE	1	GATCACCTCCTTACC	GGCGTTCTCAGGGGGTATCTTTGA	-9.48051
GCF_007981265.1	s__erwinia sp007981265	g__erwinia	f__enterobacteriaceae	o__enterobacterales	c__gammaproteobacteria	p__proteobacteria	d__bacteria	TRUE	TRUE	1.2e-09	TRUE	1	GATCACCTCCTTACC	GGCGTTCTTAGGGGGTATCTTTGA	-9.48051
GCF_017161565.1	s__erwinia amylovora	g__erwinia	f__enterobacteriaceae	o__enterobacterales	c__gammaproteobacteria	p__proteobacteria	d__bacteria	TRUE	TRUE	9.5e-10	TRUE	1	GATCACCTCCTTACC	ACCGTGCTCAGGGGGTATCTTTGA	-9.48051
GCF_001517405.1	s__erwinia_b gerundensis	g__erwinia_b	f__enterobacteriaceae	o__enterobacterales	c__gammaproteobacteria	p__proteobacteria	d__bacteria	TRUE	TRUE	5.7e-10	TRUE	1	GATCACCTCCTTACC	AACGTGCTCAGGGGGTATCTTTGA	-9.48051
GCF_000026225.1	s__escherichia fergusonii	g__escherichia	f__enterobacteriaceae	o__enterobacterales	c__gammaproteobacteria	p__proteobacteria	d__bacteria	TRUE	TRUE	1.6e-09	TRUE	1	GATCACCTCCTTACC	GACGTTCTTAGGGGGTATCTTTGA	-9.48051
GCF_003697165.2	s__escherichia coli	g__escherichia	f__enterobacteriaceae	o__enterobacterales	c__gammaproteobacteria	p__proteobacteria	d__bacteria	TRUE	TRUE	1.6e-09	TRUE	1	GATCACCTCCTTACC	GACGTTCTTAGGGGGTATCTTTGA	-9.48051
GCF_005843885.1	s__escherichia sp005843885	g__escherichia	f__enterobacteriaceae	o__enterobacterales	c__gammaproteobacteria	p__proteobacteria	d__bacteria	TRUE	TRUE	1.6e-09	TRUE	1	GATCACCTCCTTACC	GACGTTCTTAGGGGGTATCTTTGA	-9.48051
GCF_002900365.1	s__escherichia marmotae	g__escherichia	f__enterobacteriaceae	o__enterobacterales	c__gammaproteobacteria	p__proteobacteria	d__bacteria	TRUE	TRUE	6.8e-10	TRUE	1	GATCACCTCCTTACC	GACGTTCTTAGGGGGTATCTTTGA	-9.48051
GCF_000177235.2	s__evansella cellulosilytica	g__evansella	f__salisediminibacteriaceae	o__bacillales_h	c__bacilli	p__firmicutes	d__bacteria	TRUE	TRUE	1.4e-08	TRUE	1	GATCACCTCCTTTCT	AATGACTTTAGGGGGTCTCTTTGA	-9.48051
GCF_000148645.1	s__ferrimonas balearica	g__ferrimonas	f__shewanellaceae	o__enterobacterales	c__gammaproteobacteria	p__proteobacteria	d__bacteria	TRUE	TRUE	1.3e-09	TRUE	1	GATCACCTCCTTAAC	GAACTCCTTAGGGGGTACCTTTGA	-9.48051
GCF_001642935.1	s__fictibacillus arsenicus_b	g__fictibacillus	f__fictibacillaceae	o__bacillales_g	c__bacilli	p__firmicutes	d__bacteria	TRUE	TRUE	1e-06	TRUE	1	GATCACCTCCTTTCT	AACGACTTTAGGGGGTCTCTTTGA	-9.48051
GCF_001629705.1	s__fictibacillus phosphorivorans_a	g__fictibacillus	f__fictibacillaceae	o__bacillales_g	c__bacilli	p__firmicutes	d__bacteria	TRUE	TRUE	1e-06	TRUE	1	GATCACCTCCTTTCT	AACGACTTTAGGGGGTCTCTTTGA	-9.48051
GCF_000242255.2	s__frateuria aurantia	g__frateuria	f__rhodanobacteraceae	o__xanthomonadales	c__gammaproteobacteria	p__proteobacteria	d__bacteria	TRUE	TRUE	1.6e-08	TRUE	1	GATCACCTCCTTTCG	GCCTTGCTTAGGGGGTATCTTTGA	-9.48051
GCF_013394045.1	s__furfurilactobacillus rossiae_a	g__furfurilactobacillus	f__lactobacillaceae	o__lactobacillales	c__bacilli	p__firmicutes	d__bacteria	TRUE	TRUE	1.4e-06	TRUE	1	GATCACCTCCTTTCT	ACGAACTTTAGGGGGTCACTTTGA	-9.48051
GCF_014337255.1	s__fusobacterium_a sp900015295	g__fusobacterium_a	f__fusobacteriaceae	o__fusobacteriales	c__fusobacteriia	p__fusobacteriota	d__bacteria	TRUE	TRUE	2.4e-06	TRUE	1	GATCACCTCCTTTCT	AAACATATCAGGGGGTCTCTTTGA	-9.48051
GCF_003367375.1	s__gallaecimonas mangrovi	g__gallaecimonas	f__gallaecimonadaceae	o__enterobacterales	c__gammaproteobacteria	p__proteobacteria	d__bacteria	TRUE	TRUE	8.9e-09	TRUE	1	GATCACCTCCTTACT	GAGGTTCTTAGGGGGTACCTTTGA	-9.48051
GCF_000445995.2	s__geobacillus sp000445995	g__geobacillus	f__anoxybacillaceae	o__bacillales	c__bacilli	p__firmicutes	d__bacteria	TRUE	TRUE	1.9e-08	TRUE	1	GATCACCTCCTTTCT	GCGGAAATCAGGGGGTCTCTTTGA	-9.48051
GCF_014679505.1	s__geobacillus sp002077765	g__geobacillus	f__anoxybacillaceae	o__bacillales	c__bacilli	p__firmicutes	d__bacteria	TRUE	TRUE	1.9e-08	TRUE	1	GATCACCTCCTTTCT	GCGGAAATCAGGGGGTCTCTTTGA	-9.48051
GCF_001618685.1	s__geobacillus subterraneus	g__geobacillus	f__anoxybacillaceae	o__bacillales	c__bacilli	p__firmicutes	d__bacteria	TRUE	TRUE	1.9e-08	TRUE	1	GATCACCTCCTTTCT	GCGGAAATCAGGGGGTCTCTTTGA	-9.48051
GCF_002291425.1	s__gibbsiella quercinecans	g__gibbsiella	f__enterobacteriaceae	o__enterobacterales	c__gammaproteobacteria	p__proteobacteria	d__bacteria	TRUE	TRUE	3.4e-10	TRUE	1	GATCACCTCCTTACC	GCCGTTCTTAGGGGGTATCTTTGA	-9.48051
GCF_009650095.1	s__gracilibacillus sp002797295	g__gracilibacillus	f__amphibacillaceae	o__bacillales_d	c__bacilli	p__firmicutes	d__bacteria	TRUE	TRUE	8.3e-09	TRUE	1	GATCACCTCCTTTCT	GCGGATTTTAGGGGGTCTCTTTGA	-9.48051
GCF_000940805.1	s__gynuella sunshinyii	g__gynuella	f__natronospirillaceae	o__pseudomonadales	c__gammaproteobacteria	p__proteobacteria	d__bacteria	TRUE	TRUE	5.1e-09	TRUE	1	GATCACCTCCTTAAA	AGCGTGCTTAGGGGGTATCTTTGA	-9.48051
GCF_001983995.1	s__halioglobus japonicus	g__halioglobus	f__halieaceae	o__pseudomonadales	c__gammaproteobacteria	p__proteobacteria	d__bacteria	TRUE	TRUE	2.6e-09	TRUE	1	GATCACCTCCTTAAA	GACGTGCTTAGGGGGTATCTTTGA	-9.48051
GCF_009388985.1	s__halioglobus maricola	g__halioglobus	f__halieaceae	o__pseudomonadales	c__gammaproteobacteria	p__proteobacteria	d__bacteria	TRUE	TRUE	2.6e-09	TRUE	1	GATCACCTCCTTAAA	GACGTGCTTAGGGGGTATCTTTGA	-9.48051
GCF_002097535.1	s__halobacillus mangrovi	g__halobacillus	f__halobacillaceae	o__bacillales_d	c__bacilli	p__firmicutes	d__bacteria	TRUE	TRUE	6e-06	TRUE	1	GATCACCTCCTTTCT	GCGGACTTCAGGGGGTCTCTTTGA	-9.48051
GCF_000284515.1	s__halobacillus halophilus	g__halobacillus	f__halobacillaceae	o__bacillales_d	c__bacilli	p__firmicutes	d__bacteria	TRUE	TRUE	3.8e-05	TRUE	1	GATCACCTCCTTTCT	GCTGACTTCAGGGGGTCTCTTTGA	-9.48051
GCF_000469135.2	s__halobacillus sp001592845	g__halobacillus	f__halobacillaceae	o__bacillales_d	c__bacilli	p__firmicutes	d__bacteria	TRUE	TRUE	5e-06	TRUE	1	GATCACCTCCTTTCT	GCGGACTTCAGGGGGTCTCTTTGA	-9.48051
GCF_004101865.1	s__halobacillus litoralis_a	g__halobacillus	f__halobacillaceae	o__bacillales_d	c__bacilli	p__firmicutes	d__bacteria	TRUE	TRUE	2.8e-06	TRUE	1	GATCACCTCCTTTCT	GCGGACTTCAGGGGGTCTCTTTGA	-9.48051
GCF_002966495.1	s__halomonas sp002966495	g__halomonas	f__halomonadaceae	o__pseudomonadales	c__gammaproteobacteria	p__proteobacteria	d__bacteria	TRUE	TRUE	5.8e-09	TRUE	1	GATCACCTCCTTAAA	GACGTTCTTAGGGGGTATCTTTGA	-9.48051
GCF_014263395.1	s__halomonas sp014263395	g__halomonas	f__halomonadaceae	o__pseudomonadales	c__gammaproteobacteria	p__proteobacteria	d__bacteria	TRUE	TRUE	8.3e-08	TRUE	1	GATCACCTCCTTAAA	GAGGTTCTTAGGGGGTATCTTTGA	-9.48051
GCF_009846525.1	s__halomonas sp002696125	g__halomonas	f__halomonadaceae	o__pseudomonadales	c__gammaproteobacteria	p__proteobacteria	d__bacteria	TRUE	TRUE	1.4e-07	TRUE	1	GATCACCTCCTTAAA	GACGTTCTTAGGGGGTATCTTTGA	-9.48051
GCF_015767635.1	s__halomonas sp002119345	g__halomonas	f__halomonadaceae	o__pseudomonadales	c__gammaproteobacteria	p__proteobacteria	d__bacteria	TRUE	TRUE	5.8e-08	TRUE	1	GATCACCTCCTTAAA	GAGGTTCTTAGGGGGTATCTTTGA	-9.48051
GCF_002082565.1	s__halomonas sp002082565	g__halomonas	f__halomonadaceae	o__pseudomonadales	c__gammaproteobacteria	p__proteobacteria	d__bacteria	TRUE	TRUE	5.8e-09	TRUE	1	GATCACCTCCTTAAA	GACGTTCTTAGGGGGTATCTTTGA	-9.48051
GCF_003031405.1	s__halomonas sp003031405	g__halomonas	f__halomonadaceae	o__pseudomonadales	c__gammaproteobacteria	p__proteobacteria	d__bacteria	TRUE	TRUE	5.8e-09	TRUE	1	GATCACCTCCTTAAA	GATGTTCTTAGGGGGTATCTTTGA	-9.48051
GCF_012427705.1	s__halomonas piezotolerans	g__halomonas	f__halomonadaceae	o__pseudomonadales	c__gammaproteobacteria	p__proteobacteria	d__bacteria	TRUE	TRUE	1.4e-07	TRUE	1	GATCACCTCCTTAAC	GACGTTCTTAGGGGGTATCTTTGA	-9.48051
GCF_016772275.1	s__heyndrickxia vini	g__heyndrickxia	f__bacillaceae_c	o__bacillales_b	c__bacilli	p__firmicutes	d__bacteria	TRUE	TRUE	8e-07	TRUE	1	GATCACCTCCTTTCT	GCGGACTTTAGGGGGTCTCTTTGA	-9.48051
GCF_004786015.1	s__hydrogenovibrio crunogenus_b	g__hydrogenovibrio	f__thiomicrospiraceae	o__thiomicrospirales	c__gammaproteobacteria	p__proteobacteria	d__bacteria	TRUE	TRUE	1.8e-08	TRUE	1	GATCACCTCCTTTAA	GAAGTGCTTAGGGGGTATCTTTGA	-9.48051
GCF_013340845.1	s__hydrogenovibrio marinus	g__hydrogenovibrio	f__thiomicrospiraceae	o__thiomicrospirales	c__gammaproteobacteria	p__proteobacteria	d__bacteria	TRUE	TRUE	1.2e-08	TRUE	1	GATCACCTCCTTTAA	CAAGTACTTAGGGGGTATCTTTGA	-9.48051
GCF_004028275.1	s__hydrogenovibrio thermophilus	g__hydrogenovibrio	f__thiomicrospiraceae	o__thiomicrospirales	c__gammaproteobacteria	p__proteobacteria	d__bacteria	TRUE	TRUE	1.9e-08	TRUE	1	GATCACCTCCTTTAA	GACGTGCTTAGGGGGTATCTTTGA	-9.48051
GCF_002808045.1	s__idiomarina sp002808045	g__idiomarina	f__alteromonadaceae	o__enterobacterales	c__gammaproteobacteria	p__proteobacteria	d__bacteria	TRUE	TRUE	6.2e-08	TRUE	1	GATCACCTCCTTACA	GATGCGCTTAGGGGGTATCTTTGA	-9.48051
GCF_000008465.1	s__idiomarina loihiensis	g__idiomarina	f__alteromonadaceae	o__enterobacterales	c__gammaproteobacteria	p__proteobacteria	d__bacteria	TRUE	TRUE	6.5e-08	TRUE	1	GATCACCTCCTTACA	AATTCGCTTAGGGGGTATCTTTGA	-9.48051
GCF_002211765.1	s__idiomarina piscisalsi_a	g__idiomarina	f__alteromonadaceae	o__enterobacterales	c__gammaproteobacteria	p__proteobacteria	d__bacteria	TRUE	TRUE	6.2e-08	TRUE	1	GATCACCTCCTTACA	GATGCGCTTAGGGGGTATCTTTGA	-9.48051
GCF_000165505.1	s__ilyobacter polytropus	g__ilyobacter	f__fusobacteriaceae	o__fusobacteriales	c__fusobacteriia	p__fusobacteriota	d__bacteria	TRUE	TRUE	0.0038	TRUE	1	GATCACCTCCTTTCT	GAAGAAATCAGGGGGTCTCTTTGA	-9.48051
GCF_001010805.1	s__imcc21906 sp001010805	g__imcc21906	f__spongiibacteraceae	o__pseudomonadales	c__gammaproteobacteria	p__proteobacteria	d__bacteria	TRUE	TRUE	9.6e-09	TRUE	1	GATCACCTCCTTAAC	AATACGCTCAGGGGGTATCTTTGA	-9.48051
GCF_001999905.1	s__indiicoccus sp001999905	g__indiicoccus	f__planococcaceae	o__bacillales_a	c__bacilli	p__firmicutes	d__bacteria	TRUE	TRUE	0.0001	TRUE	1	GATCACCTCCTTTCT	GCGGACTACAGGGGGTCTCTTTGA	-9.48051
GCF_005671395.1	s__jejubacter calystegiae	g__jejubacter	f__enterobacteriaceae	o__enterobacterales	c__gammaproteobacteria	p__proteobacteria	d__bacteria	TRUE	TRUE	1.2e-09	TRUE	1	GATCACCTCCTTACC	GACGTTCTTAGGGGGTATCTTTGA	-9.48051
GCF_003955755.1	s__jeotgalibaca ciconiae	g__jeotgalibaca	f__aerococcaceae	o__lactobacillales	c__bacilli	p__firmicutes	d__bacteria	TRUE	TRUE	1.7e-05	TRUE	1	GATCACCTCCTTTCT	ACAAGCTTTAGGGGGTCTCTTTGA	-9.48051
GCF_000818095.1	s__jeotgalibacillus malaysiensis	g__jeotgalibacillus	f__jeotgalibacillaceae	o__bacillales_b	c__bacilli	p__firmicutes	d__bacteria	TRUE	TRUE	7.6e-05	TRUE	1	GATCACCTCCTTTCT	GCGGACTTCAGGGGGTCTCTTTGA	-9.48051
GCF_003595195.1	s__k2r23-3 sp003595195	g__k2r23-3	f__planococcaceae	o__bacillales_a	c__bacilli	p__firmicutes	d__bacteria	TRUE	TRUE	6.7e-05	TRUE	1	GATCACCTCCTTTCT	GCGGATTTTAGGGGGTCTCTTTGA	-9.48051
GCF_000981765.1	s__kangiella geojedonensis	g__kangiella	f__kangiellaceae	o__enterobacterales	c__gammaproteobacteria	p__proteobacteria	d__bacteria	TRUE	TRUE	1.9e-09	TRUE	1	GATCACCTCCTTAAC	GAAACGCTTAGGGGGTATCTTTGA	-9.48051
GCF_001708405.1	s__kangiella sediminilitoris	g__kangiella	f__kangiellaceae	o__enterobacterales	c__gammaproteobacteria	p__proteobacteria	d__bacteria	TRUE	TRUE	1.9e-09	TRUE	1	GATCACCTCCTTAAC	GAAACGCTTAGGGGGTATCTTTGA	-9.48051
GCF_002838765.1	s__kangiella profundi	g__kangiella	f__kangiellaceae	o__enterobacterales	c__gammaproteobacteria	p__proteobacteria	d__bacteria	TRUE	TRUE	7.8e-10	TRUE	1	GATCACCTCCTTACA	GAAACGCTTAGGGGGTATCTTTGA	-9.48051
GCF_000024085.1	s__kangiella koreensis	g__kangiella	f__kangiellaceae	o__enterobacterales	c__gammaproteobacteria	p__proteobacteria	d__bacteria	TRUE	TRUE	1.6e-09	TRUE	1	GATCACCTCCTTACA	ACAACGCTTAGGGGGTATCTTTGA	-9.48051
GCF_009707385.1	s__klebsiella oxytoca_c	g__klebsiella	f__enterobacteriaceae	o__enterobacterales	c__gammaproteobacteria	p__proteobacteria	d__bacteria	TRUE	TRUE	6.8e-10	TRUE	1	GATCACCTCCTTACC	GACGTTCTTAGGGGGTATCTTTGA	-9.48051
GCF_000215745.1	s__klebsiella aerogenes	g__klebsiella	f__enterobacteriaceae	o__enterobacterales	c__gammaproteobacteria	p__proteobacteria	d__bacteria	TRUE	TRUE	6.8e-10	TRUE	1	GATCACCTCCTTACC	GACGTTCTTAGGGGGTATCTTTGA	-9.48051
GCF_003261575.2	s__klebsiella huaxiensis	g__klebsiella	f__enterobacteriaceae	o__enterobacterales	c__gammaproteobacteria	p__proteobacteria	d__bacteria	TRUE	TRUE	6.8e-10	TRUE	1	GATCACCTCCTTACC	GACGTTCTCAGGGGGTATCTTTGA	-9.48051
GCF_000828055.2	s__klebsiella variicola	g__klebsiella	f__enterobacteriaceae	o__enterobacterales	c__gammaproteobacteria	p__proteobacteria	d__bacteria	TRUE	TRUE	6.8e-10	TRUE	1	GATCACCTCCTTACC	GACGTTCTTAGGGGGTATCTTTGA	-9.48051
GCF_006711645.1	s__klebsiella electrica	g__klebsiella	f__enterobacteriaceae	o__enterobacterales	c__gammaproteobacteria	p__proteobacteria	d__bacteria	TRUE	TRUE	6.8e-10	TRUE	1	GATCACCTCCTTACC	GACGTTCTTAGGGGGTATCTTTGA	-9.48051
GCF_014168815.1	s__kluyvera ascorbata_b	g__kluyvera	f__enterobacteriaceae	o__enterobacterales	c__gammaproteobacteria	p__proteobacteria	d__bacteria	TRUE	TRUE	1.8e-09	TRUE	1	GATCACCTCCTTACC	AACGTTCTTAGGGGGTATCTTTGA	-9.48051
GCF_001658025.2	s__kosakonia oryzae	g__kosakonia	f__enterobacteriaceae	o__enterobacterales	c__gammaproteobacteria	p__proteobacteria	d__bacteria	TRUE	TRUE	6.8e-10	TRUE	1	GATCACCTCCTTACC	GACGTTCTTAGGGGGTATCTTTGA	-9.48051
GCF_014490785.1	s__kosakonia sp014490785	g__kosakonia	f__enterobacteriaceae	o__enterobacterales	c__gammaproteobacteria	p__proteobacteria	d__bacteria	TRUE	TRUE	6.8e-10	TRUE	1	GATCACCTCCTTACC	GACGTTCTTAGGGGGTATCTTTGA	-9.48051
GCF_000280495.2	s__kosakonia radicincitans	g__kosakonia	f__enterobacteriaceae	o__enterobacterales	c__gammaproteobacteria	p__proteobacteria	d__bacteria	TRUE	TRUE	6.8e-10	TRUE	1	GATCACCTCCTTACC	GACGTTCTTAGGGGGTATCTTTGA	-9.48051
GCF_000300455.3	s__kosakonia sacchari	g__kosakonia	f__enterobacteriaceae	o__enterobacterales	c__gammaproteobacteria	p__proteobacteria	d__bacteria	TRUE	TRUE	6.8e-10	TRUE	1	GATCACCTCCTTACC	GACGTTCTTAGGGGGTATCTTTGA	-9.48051
GCF_001975225.1	s__kosakonia cowanii	g__kosakonia	f__enterobacteriaceae	o__enterobacterales	c__gammaproteobacteria	p__proteobacteria	d__bacteria	TRUE	TRUE	6.8e-10	TRUE	1	GATCACCTCCTTACC	GACGTTCTTAGGGGGTATCTTTGA	-9.48051
GCF_013282215.1	s__kroppenstedtia eburnea	g__kroppenstedtia	f__dsm-45169	o__thermoactinomycetales	c__bacilli	p__firmicutes	d__bacteria	TRUE	TRUE	0.00022	TRUE	1	GATCACCTCCTTTCT	GCGGACATCAGGGGGTCTCTTTGA	-9.48051
GCF_013265585.1	s__kroppenstedtia_a pulmonis	g__kroppenstedtia_a	f__dsm-45169	o__thermoactinomycetales	c__bacilli	p__firmicutes	d__bacteria	TRUE	TRUE	2.2e-05	TRUE	1	GATCACCTCCTTTCT	GCGGACATCAGGGGGTCTCTTTGA	-9.48051
GCF_012955605.1	s__l13 sp012955605	g__l13		o__jc228	c__bacilli	p__firmicutes	d__bacteria	TRUE	TRUE	3.3e-05	TRUE	1	GATCACCTCCTTTCT	GCGGACTTCAGGGGGTCTCTTTGA	-9.48051
GCF_001466725.1	s__lacimicrobium alkaliphilum_b	g__lacimicrobium	f__alteromonadaceae	o__enterobacterales	c__gammaproteobacteria	p__proteobacteria	d__bacteria	TRUE	TRUE	3.8e-07	TRUE	1	GATCACCTCCTTACG	GCGGCGCTTAGGGGGTATCTTTGA	-9.48051
GCF_000829035.1	s__lacticaseibacillus paracasei	g__lacticaseibacillus	f__lactobacillaceae	o__lactobacillales	c__bacilli	p__firmicutes	d__bacteria	TRUE	TRUE	3.5e-05	TRUE	1	GATCACCTCCTTTCT	AATCAATTTAGGGGGTCACTTTGA	-9.48051
GCF_000829055.1	s__lacticaseibacillus casei	g__lacticaseibacillus	f__lactobacillaceae	o__lactobacillales	c__bacilli	p__firmicutes	d__bacteria	TRUE	TRUE	9e-06	TRUE	1	GATCACCTCCTTTCT	AATCAATTTAGGGGGTCACTTTGA	-9.48051
GCF_900636965.1	s__lacticaseibacillus rhamnosus	g__lacticaseibacillus	f__lactobacillaceae	o__lactobacillales	c__bacilli	p__firmicutes	d__bacteria	TRUE	TRUE	3.5e-05	TRUE	1	GATCACCTCCTTTCT	AATCAATTCAGGGGGTCTCTTTGA	-9.48051
GCF_003641145.1	s__lactiplantibacillus paraplantarum	g__lactiplantibacillus	f__lactobacillaceae	o__lactobacillales	c__bacilli	p__firmicutes	d__bacteria	TRUE	TRUE	2.8e-06	TRUE	1	GATCACCTCCTTTCT	GACGACTTTAGGGGGTCGCTTTGA	-9.48051
GCF_014131735.1	s__lactiplantibacillus plantarum	g__lactiplantibacillus	f__lactobacillaceae	o__lactobacillales	c__bacilli	p__firmicutes	d__bacteria	TRUE	TRUE	2.8e-06	TRUE	1	GATCACCTCCTTTCT	GACGACTTTAGGGGGTCGCTTTGA	-9.48051
GCF_003641185.1	s__lactiplantibacillus pentosus	g__lactiplantibacillus	f__lactobacillaceae	o__lactobacillales	c__bacilli	p__firmicutes	d__bacteria	TRUE	TRUE	5.7e-06	TRUE	1	GATCACCTCCTTTCT	GACGACTTTAGGGGGTCGCTTTGA	-9.48051
GCF_002970915.1	s__lactiplantibacillus sp002970915	g__lactiplantibacillus	f__lactobacillaceae	o__lactobacillales	c__bacilli	p__firmicutes	d__bacteria	TRUE	TRUE	7.2e-06	TRUE	1	GATCACCTCCTTTCT	GGTGACTTTAGGGGGTCGCTTTGA	-9.48051
GCF_002970935.1	s__lactiplantibacillus sp002970935	g__lactiplantibacillus	f__lactobacillaceae	o__lactobacillales	c__bacilli	p__firmicutes	d__bacteria	TRUE	TRUE	7.2e-06	TRUE	1	GATCACCTCCTTTCT	GGCGACTTTAGGGGGTCACTTTGA	-9.48051
GCF_002706375.1	s__lactobacillus amylovorus	g__lactobacillus	f__lactobacillaceae	o__lactobacillales	c__bacilli	p__firmicutes	d__bacteria	TRUE	TRUE	7.3e-09	TRUE	1	GATCACCTCCTTTCT	AATCACTTTAGGGGGTCTCTTTGA	-9.48051
GCF_018987235.1	s__lactobacillus crispatus	g__lactobacillus	f__lactobacillaceae	o__lactobacillales	c__bacilli	p__firmicutes	d__bacteria	TRUE	TRUE	7.3e-09	TRUE	1	GATCACCTCCTTTCT	AATCACTTTAGGGGGTCTCTTTGA	-9.48051
GCF_004101845.1	s__latilactobacillus curvatus	g__latilactobacillus	f__lactobacillaceae	o__lactobacillales	c__bacilli	p__firmicutes	d__bacteria	TRUE	TRUE	3e-05	TRUE	1	GATCACCTCCTTTCT	ACGCAATTTAGGGGGTCACTTTGA	-9.48051
GCF_002370355.1	s__latilactobacillus sakei	g__latilactobacillus	f__lactobacillaceae	o__lactobacillales	c__bacilli	p__firmicutes	d__bacteria	TRUE	TRUE	1.3e-05	TRUE	1	GATCACCTCCTTTCT	ACGCAGTTCAGGGGGTCTCTTTGA	-9.48051
GCF_002953655.1	s__latilactobacillus sakei_a	g__latilactobacillus	f__lactobacillaceae	o__lactobacillales	c__bacilli	p__firmicutes	d__bacteria	TRUE	TRUE	3.9e-05	TRUE	1	GATCACCTCCTTTCT	ACGCAATTCAGGGGGTCTCTTTGA	-9.48051
GCF_900637555.1	s__lautropia mirabilis	g__lautropia	f__burkholderiaceae	o__burkholderiales	c__gammaproteobacteria	p__proteobacteria	d__bacteria	TRUE	TRUE	1.3e-07	TRUE	1	GATCACCTCCTTTCA	GAGGATCTCAGGGGGTATCTTTGA	-9.48051
GCF_006171285.1	s__leclercia adecarboxylata_a	g__leclercia	f__enterobacteriaceae	o__enterobacterales	c__gammaproteobacteria	p__proteobacteria	d__bacteria	TRUE	TRUE	6.8e-10	TRUE	1	GATCACCTCCTTACC	GACGTTCTTAGGGGGTATCTTTGA	-9.48051
GCF_002902985.1	s__leclercia sp002902985	g__leclercia	f__enterobacteriaceae	o__enterobacterales	c__gammaproteobacteria	p__proteobacteria	d__bacteria	TRUE	TRUE	6.8e-10	TRUE	1	GATCACCTCCTTACC	GACGTTCTTAGGGGGTATCTTTGA	-9.48051
GCF_006874705.1	s__leclercia adecarboxylata_c	g__leclercia	f__enterobacteriaceae	o__enterobacterales	c__gammaproteobacteria	p__proteobacteria	d__bacteria	TRUE	TRUE	6.8e-10	TRUE	1	GATCACCTCCTTACC	GACGTTCTTAGGGGGTATCTTTGA	-9.48051
GCF_011290365.1	s__leclercia sp003024485	g__leclercia	f__enterobacteriaceae	o__enterobacterales	c__gammaproteobacteria	p__proteobacteria	d__bacteria	TRUE	TRUE	6.8e-10	TRUE	1	GATCACCTCCTTACC	GACGTTCTTAGGGGGTATCTTTGA	-9.48051
GCF_900637685.1	s__legionella sainthelensi	g__legionella	f__legionellaceae	o__legionellales	c__gammaproteobacteria	p__proteobacteria	d__bacteria	TRUE	TRUE	3.3e-07	TRUE	1	GATCACCTCCTTAAA	GCAGCGCTTAGGGGGTATCTTTGA	-9.48051
GCF_014109805.1	s__legionella sp014109805	g__legionella	f__legionellaceae	o__legionellales	c__gammaproteobacteria	p__proteobacteria	d__bacteria	TRUE	TRUE	1.2e-07	TRUE	1	GATCACCTCCTTAAA	GAAGCGCTTAGGGGGTATCTTTGA	-9.48051
GCF_900637585.1	s__legionella pascullei	g__legionella	f__legionellaceae	o__legionellales	c__gammaproteobacteria	p__proteobacteria	d__bacteria	TRUE	TRUE	1.5e-07	TRUE	1	GATCACCTCCTTAAA	GAATCGCTTAGGGGGTATCTTTGA	-9.48051
GCF_011764505.1	s__legionella sp011764505	g__legionella	f__legionellaceae	o__legionellales	c__gammaproteobacteria	p__proteobacteria	d__bacteria	TRUE	TRUE	8.8e-06	TRUE	1	GATCACCTCCTTAAT	GAGTCGCTTAGGGGGTACCTTTGA	-9.48051
GCF_000953135.1	s__legionella fallonii	g__legionella	f__legionellaceae	o__legionellales	c__gammaproteobacteria	p__proteobacteria	d__bacteria	TRUE	TRUE	6.8e-07	TRUE	1	GATCACCTCCTTAAT	GAATCCCTTAGGGGGTATCTTTGA	-9.48051
GCF_900635815.1	s__legionella cherrii	g__legionella	f__legionellaceae	o__legionellales	c__gammaproteobacteria	p__proteobacteria	d__bacteria	TRUE	TRUE	9.2e-08	TRUE	1	GATCACCTCCTTAAT	GAAGCGCTTAGGGGGTATCTTTGA	-9.48051
GCF_014109825.1	s__legionella sp014109825	g__legionella	f__legionellaceae	o__legionellales	c__gammaproteobacteria	p__proteobacteria	d__bacteria	TRUE	TRUE	2.2e-07	TRUE	1	GATCACCTCCTTAAT	GAAGCGCTTAGGGGGTATCTTTGA	-9.48051
GCF_000008485.1	s__legionella pneumophila	g__legionella	f__legionellaceae	o__legionellales	c__gammaproteobacteria	p__proteobacteria	d__bacteria	TRUE	TRUE	1.5e-07	TRUE	1	GATCACCTCCTTACA	GAATCGCTTAGGGGGTATCTTTGA	-9.48051
GCF_001652505.2	s__lelliottia amnigena_a	g__lelliottia	f__enterobacteriaceae	o__enterobacterales	c__gammaproteobacteria	p__proteobacteria	d__bacteria	TRUE	TRUE	6.8e-10	TRUE	1	GATCACCTCCTTACC	GACGTTCTTAGGGGGTATCTTTGA	-9.48051
GCF_013373365.1	s__lentibacillus sp013373365	g__lentibacillus	f__amphibacillaceae	o__bacillales_d	c__bacilli	p__firmicutes	d__bacteria	TRUE	TRUE	4.3e-06	TRUE	1	GATCACCTCCTTTCT	ACTGAATTCAGGGGGTCTCTTTGA	-9.48051
GCF_001307805.1	s__lentibacillus amyloliquefaciens	g__lentibacillus	f__amphibacillaceae	o__bacillales_d	c__bacilli	p__firmicutes	d__bacteria	TRUE	TRUE	2.3e-08	TRUE	1	GATCACCTCCTTTCT	GATGATTTCAGGGGGTCTCTTTGA	-9.48051
GCF_000019785.1	s__leptothrix cholodnii	g__leptothrix	f__burkholderiaceae	o__burkholderiales	c__gammaproteobacteria	p__proteobacteria	d__bacteria	TRUE	TRUE	3.7e-07	TRUE	1	GATCACCTCCTTTCT	ACGGCGCTCAGGGGGTATCTTTGA	-9.48051
GCF_000060285.1	s__listeria welshimeri	g__listeria	f__listeriaceae	o__lactobacillales	c__bacilli	p__firmicutes	d__bacteria	TRUE	TRUE	4.1e-07	TRUE	1	GATCACCTCCTTTCT	AAAGACTTTAGGGGGTCTCTTTGA	-9.48051
GCF_900187025.1	s__listeria ivanovii	g__listeria	f__listeriaceae	o__lactobacillales	c__bacilli	p__firmicutes	d__bacteria	TRUE	TRUE	4.1e-07	TRUE	1	GATCACCTCCTTTCT	AAAGACTTTAGGGGGTCTCTTTGA	-9.48051
GCF_902806445.1	s__listeria sp902806445	g__listeria	f__listeriaceae	o__lactobacillales	c__bacilli	p__firmicutes	d__bacteria	TRUE	TRUE	3.1e-06	TRUE	1	GATCACCTCCTTTCT	AAAGATTTTAGGGGGTCTCTTTGA	-9.48051
GCF_000763495.1	s__listeria londoniensis	g__listeria	f__listeriaceae	o__lactobacillales	c__bacilli	p__firmicutes	d__bacteria	TRUE	TRUE	4.1e-07	TRUE	1	GATCACCTCCTTTCT	AAAGACTTTAGGGGGTCTCTTTGA	-9.48051
GCF_000307025.1	s__listeria monocytogenes_b	g__listeria	f__listeriaceae	o__lactobacillales	c__bacilli	p__firmicutes	d__bacteria	TRUE	TRUE	4.1e-07	TRUE	1	GATCACCTCCTTTCT	AAAGACTTTAGGGGGTCTCTTTGA	-9.48051
GCF_900187225.1	s__listeria monocytogenes	g__listeria	f__listeriaceae	o__lactobacillales	c__bacilli	p__firmicutes	d__bacteria	TRUE	TRUE	4.1e-07	TRUE	1	GATCACCTCCTTTCT	AAAGACTTTAGGGGGTCTCTTTGA	-9.48051
GCF_000027145.1	s__listeria seeligeri	g__listeria	f__listeriaceae	o__lactobacillales	c__bacilli	p__firmicutes	d__bacteria	TRUE	TRUE	1.5e-06	TRUE	1	GATCACCTCCTTTCT	AAAGACTTTAGGGGGTCTCTTTGA	-9.48051
GCF_003534205.1	s__listeria_a weihenstephanensis	g__listeria_a	f__listeriaceae	o__lactobacillales	c__bacilli	p__firmicutes	d__bacteria	TRUE	TRUE	5.1e-07	TRUE	1	GATCACCTCCTTTCT	AAAGACTTTAGGGGGTCTCTTTGA	-9.48051
GCF_002706425.1	s__loigolactobacillus coryniformis	g__loigolactobacillus	f__lactobacillaceae	o__lactobacillales	c__bacilli	p__firmicutes	d__bacteria	TRUE	TRUE	0.0019	TRUE	1	GATCACCTCCTTTCT	GATCAATTTAGGGGGTCACTTTGA	-9.48051
GCF_006385595.1	s__luteibacter pinisoli	g__luteibacter	f__rhodanobacteraceae	o__xanthomonadales	c__gammaproteobacteria	p__proteobacteria	d__bacteria	TRUE	TRUE	2.8e-08	TRUE	1	GATCACCTCCTTTCG	GAGTCGCTTAGGGGGTACCTTTGA	-9.48051
GCF_001887595.1	s__luteibacter rhizovicinus	g__luteibacter	f__rhodanobacteraceae	o__xanthomonadales	c__gammaproteobacteria	p__proteobacteria	d__bacteria	TRUE	TRUE	6.6e-08	TRUE	1	GATCACCTCCTTTCG	GAGTCGCTTAGGGGGTATCTTTGA	-9.48051
GCF_002327105.1	s__luteimonas chenhongjianii	g__luteimonas	f__xanthomonadaceae	o__xanthomonadales	c__gammaproteobacteria	p__proteobacteria	d__bacteria	TRUE	TRUE	1.7e-08	TRUE	1	GATCACCTCCTTTAG	GATGCGCTCAGGGGGTTTCTTTGA	-9.48051
GCF_016615815.1	s__luteimonas sp016615815	g__luteimonas	f__xanthomonadaceae	o__xanthomonadales	c__gammaproteobacteria	p__proteobacteria	d__bacteria	TRUE	TRUE	2e-08	TRUE	1	GATCACCTCCTTTAG	GATTCGCTCAGGGGGTTTCTTTGA	-9.48051
GCF_014764385.1	s__luteimonas sp014212025	g__luteimonas	f__xanthomonadaceae	o__xanthomonadales	c__gammaproteobacteria	p__proteobacteria	d__bacteria	TRUE	TRUE	2e-08	TRUE	1	GATCACCTCCTTTAG	GATTCGCTCAGGGGGTTTCTTTGA	-9.48051
GCF_002982115.1	s__lysinibacillus sphaericus	g__lysinibacillus	f__planococcaceae	o__bacillales_a	c__bacilli	p__firmicutes	d__bacteria	TRUE	TRUE	3.7e-05	TRUE	1	GATCACCTCCTTTCT	GCGGACTTTAGGGGGTCTCTTTGA	-9.48051
GCF_016638705.1	s__lysinibacillus sp001278875	g__lysinibacillus	f__planococcaceae	o__bacillales_a	c__bacilli	p__firmicutes	d__bacteria	TRUE	TRUE	2.7e-05	TRUE	1	GATCACCTCCTTTCT	GCGGATTTTAGGGGGTCTCTTTGA	-9.48051
GCF_001629735.1	s__lysinibacillus sphaericus_a	g__lysinibacillus	f__planococcaceae	o__bacillales_a	c__bacilli	p__firmicutes	d__bacteria	TRUE	TRUE	0.00016	TRUE	1	GATCACCTCCTTTCT	GTGGACTTCAGGGGGTCTCTTTGA	-9.48051
GCF_016925635.1	s__lysinibacillus fusiformis_f	g__lysinibacillus	f__planococcaceae	o__bacillales_a	c__bacilli	p__firmicutes	d__bacteria	TRUE	TRUE	0.00016	TRUE	1	GATCACCTCCTTTCT	GTGGACTTTAGGGGGTCTCTTTGA	-9.48051
GCF_015209725.1	s__lysobacter sp015209725	g__lysobacter	f__xanthomonadaceae	o__xanthomonadales	c__gammaproteobacteria	p__proteobacteria	d__bacteria	TRUE	TRUE	1.3e-08	TRUE	1	GATCACCTCCTTAGA	CAGGCGCTCAGGGGGTATCTTTGA	-9.48051
GCF_015209765.1	s__lysobacter sp015209765	g__lysobacter	f__xanthomonadaceae	o__xanthomonadales	c__gammaproteobacteria	p__proteobacteria	d__bacteria	TRUE	TRUE	1.3e-08	TRUE	1	GATCACCTCCTTAGA	CAGGCGCTCAGGGGGTATCTTTGA	-9.48051
GCF_014489475.1	s__lysobacter solisilvae	g__lysobacter	f__xanthomonadaceae	o__xanthomonadales	c__gammaproteobacteria	p__proteobacteria	d__bacteria	TRUE	TRUE	1.1e-09	TRUE	1	GATCACCTCCTTTAG	GATTCGCTTAGGGGGTATCTTTGA	-9.48051
GCF_016613535.2	s__lysobacter solisilvae_a	g__lysobacter	f__xanthomonadaceae	o__xanthomonadales	c__gammaproteobacteria	p__proteobacteria	d__bacteria	TRUE	TRUE	9.1e-10	TRUE	1	GATCACCTCCTTTAG	GATGCGCTCAGGGGGTATCTTTGA	-9.48051
GCF_001442535.1	s__lysobacter antibioticus	g__lysobacter	f__xanthomonadaceae	o__xanthomonadales	c__gammaproteobacteria	p__proteobacteria	d__bacteria	TRUE	TRUE	1.1e-09	TRUE	1	GATCACCTCCTTTAG	GATTCGCTCAGGGGGTATCTTTGA	-9.48051
GCF_907164845.1	s__lysobacter sp907164845	g__lysobacter	f__xanthomonadaceae	o__xanthomonadales	c__gammaproteobacteria	p__proteobacteria	d__bacteria	TRUE	TRUE	4.2e-09	TRUE	1	GATCACCTCCTTTAG	GATGCGCTCAGGGGGTATCTTTGA	-9.48051
GCF_003367355.1	s__lysobacter sp003367355	g__lysobacter	f__xanthomonadaceae	o__xanthomonadales	c__gammaproteobacteria	p__proteobacteria	d__bacteria	TRUE	TRUE	1.1e-09	TRUE	1	GATCACCTCCTTTAG	GATTCGCTTAGGGGGTACCTTTGA	-9.48051
GCF_017355525.1	s__lysobacter enzymogenes_c	g__lysobacter	f__xanthomonadaceae	o__xanthomonadales	c__gammaproteobacteria	p__proteobacteria	d__bacteria	TRUE	TRUE	1.5e-09	TRUE	1	GATCACCTCCTTTAG	GATTCGCTCAGGGGGTATCTTTGA	-9.48051
GCF_016613475.2	s__lysobacter arenosi	g__lysobacter	f__xanthomonadaceae	o__xanthomonadales	c__gammaproteobacteria	p__proteobacteria	d__bacteria	TRUE	TRUE	3.4e-09	TRUE	1	GATCACCTCCTTTAG	GATTCGCTTAGGGGGTATCTTTGA	-9.48051
GCF_018732085.1	s__lysobacter capsici_a	g__lysobacter	f__xanthomonadaceae	o__xanthomonadales	c__gammaproteobacteria	p__proteobacteria	d__bacteria	TRUE	TRUE	1.5e-09	TRUE	1	GATCACCTCCTTTAG	GATTCGCTCAGGGGGTATCTTTGA	-9.48051
GCF_001442805.1	s__lysobacter gummosus	g__lysobacter	f__xanthomonadaceae	o__xanthomonadales	c__gammaproteobacteria	p__proteobacteria	d__bacteria	TRUE	TRUE	1.5e-09	TRUE	1	GATCACCTCCTTTAG	GATTCGCTCAGGGGGTATCTTTGA	-9.48051
GCF_002119805.1	s__macrococcus_b canis	g__macrococcus_b	f__staphylococcaceae	o__staphylococcales	c__bacilli	p__firmicutes	d__bacteria	TRUE	TRUE	1.9e-08	TRUE	1	GATCACCTCCTTTCT	GATAGTTTCAGGGGGTCTCTTTGA	-9.48051
GCF_013377235.1	s__mannheimia varigena	g__mannheimia	f__pasteurellaceae	o__enterobacterales	c__gammaproteobacteria	p__proteobacteria	d__bacteria	TRUE	TRUE	1e-09	TRUE	1	GATCACCTCCTTACC	AAAGTTATCAGGGGGTATCTTTGA	-9.48051
GCF_000224005.2	s__marichromatium purpuratum	g__marichromatium	f__chromatiaceae	o__chromatiales	c__gammaproteobacteria	p__proteobacteria	d__bacteria	TRUE	TRUE	6e-09	TRUE	1	GATCACCTCCTTACC	CAGTCCCTTAGGGGGTATCTTTGA	-9.48051
GCF_001854125.1	s__marinobacter salinus	g__marinobacter	f__oleiphilaceae	o__pseudomonadales	c__gammaproteobacteria	p__proteobacteria	d__bacteria	TRUE	TRUE	1.8e-10	TRUE	1	GATCACCTCCTTAAA	GAAGCGCTCAGGGGGTATCTTTGA	-9.48051
GCF_001043175.1	s__marinobacter psychrophilus	g__marinobacter	f__oleiphilaceae	o__pseudomonadales	c__gammaproteobacteria	p__proteobacteria	d__bacteria	TRUE	TRUE	2.7e-09	TRUE	1	GATCACCTCCTTAAA	GAAGCGCTCAGGGGGTATCTTTGA	-9.48051
GCF_000166295.1	s__marinobacter adhaerens	g__marinobacter	f__oleiphilaceae	o__pseudomonadales	c__gammaproteobacteria	p__proteobacteria	d__bacteria	TRUE	TRUE	1.8e-10	TRUE	1	GATCACCTCCTTAAA	GAAGCGCTCAGGGGGTATCTTTGA	-9.48051
GCA_000830985.1	s__marinobacter similis	g__marinobacter	f__oleiphilaceae	o__pseudomonadales	c__gammaproteobacteria	p__proteobacteria	d__bacteria	TRUE	TRUE	1.5e-10	TRUE	1	GATCACCTCCTTAAA	GAAGCGCTCAGGGGGTATCTTTGA	-9.48051
GCF_003994855.1	s__marinobacter sp003994855	g__marinobacter	f__oleiphilaceae	o__pseudomonadales	c__gammaproteobacteria	p__proteobacteria	d__bacteria	TRUE	TRUE	1.8e-10	TRUE	1	GATCACCTCCTTAAA	GAAGCGCTCAGGGGGTATCTTTGA	-9.48051
GCF_017301335.1	s__marinobacter sp017301335	g__marinobacter	f__oleiphilaceae	o__pseudomonadales	c__gammaproteobacteria	p__proteobacteria	d__bacteria	TRUE	TRUE	1.8e-10	TRUE	1	GATCACCTCCTTAAA	GAAGCGCTTAGGGGGTATCTTTGA	-9.48051
GCF_003441595.1	s__marinobacter sp003441595	g__marinobacter	f__oleiphilaceae	o__pseudomonadales	c__gammaproteobacteria	p__proteobacteria	d__bacteria	TRUE	TRUE	1.8e-10	TRUE	1	GATCACCTCCTTAAA	GAAGCGCTCAGGGGGTATCTTTGA	-9.48051
GCF_008122265.1	s__marinobacter_a fonticola	g__marinobacter_a	f__oleiphilaceae	o__pseudomonadales	c__gammaproteobacteria	p__proteobacteria	d__bacteria	TRUE	TRUE	1.4e-10	TRUE	1	GATCACCTCCTTAAA	GAAGCGCTTAGGGGGTACCTTTGA	-9.48051
GCF_003667825.1	s__metabacillus litoralis_b	g__metabacillus	f__bacillaceae	o__bacillales	c__bacilli	p__firmicutes	d__bacteria	TRUE	TRUE	7.9e-08	TRUE	1	GATCACCTCCTTTCT	GCGGACTTTAGGGGGTCTCTTTGA	-9.48051
GCF_009720625.1	s__metabacillus sp004801455	g__metabacillus	f__bacillaceae	o__bacillales	c__bacilli	p__firmicutes	d__bacteria	TRUE	TRUE	8.8e-07	TRUE	1	GATCACCTCCTTTCT	GCGGACTTTAGGGGGTCTCTTTGA	-9.48051
GCF_001889165.1	s__metabacillus weihaiensis	g__metabacillus	f__bacillaceae	o__bacillales	c__bacilli	p__firmicutes	d__bacteria	TRUE	TRUE	7.9e-08	TRUE	1	GATCACCTCCTTTCT	GCGGACTTTAGGGGGTCTCTTTGA	-9.48051
GCF_014217835.1	s__metabacillus litoralis_a	g__metabacillus	f__bacillaceae	o__bacillales	c__bacilli	p__firmicutes	d__bacteria	TRUE	TRUE	7.9e-08	TRUE	1	GATCACCTCCTTTCT	GCGGACTTTAGGGGGTCTCTTTGA	-9.48051
GCF_003584645.1	s__methylocaldum marinum	g__methylocaldum	f__methylococcaceae	o__methylococcales	c__gammaproteobacteria	p__proteobacteria	d__bacteria	TRUE	TRUE	3.1e-08	TRUE	1	GATCACCTCCTTTCA	GCAGCTCTTAGGGGGTATCTTTGA	-9.48051
GCF_012769535.1	s__methylococcus sp012769535	g__methylococcus	f__methylococcaceae	o__methylococcales	c__gammaproteobacteria	p__proteobacteria	d__bacteria	TRUE	TRUE	8e-09	TRUE	1	GATCACCTCCTTTAA	GATGCTCTTAGGGGGTATCTTTGA	-9.48051
GCF_000260985.4	s__methylophaga nitratireducenticrescens	g__methylophaga	f__methylophagaceae	o__nitrosococcales	c__gammaproteobacteria	p__proteobacteria	d__bacteria	TRUE	TRUE	4.3e-06	TRUE	1	GATCACCTCCTTTCG	GACGATCTCAGGGGGTATCTTTGA	-9.48051
GCF_000260965.1	s__methylophaga frappieri	g__methylophaga	f__methylophagaceae	o__nitrosococcales	c__gammaproteobacteria	p__proteobacteria	d__bacteria	TRUE	TRUE	4.3e-06	TRUE	1	GATCACCTCCTTTCG	GACGATCTCAGGGGGTATCTTTGA	-9.48051
GCF_000981505.1	s__methylopumilus planktonicus	g__methylopumilus	f__methylophilaceae	o__burkholderiales	c__gammaproteobacteria	p__proteobacteria	d__bacteria	TRUE	TRUE	3.4e-06	TRUE	1	GATCACCTCCTTTCT	CAAGCGCTTAGGGGGTATCTTTGA	-9.48051
GCF_009498235.1	s__methylospira mobilis	g__methylospira	f__methylococcaceae	o__methylococcales	c__gammaproteobacteria	p__proteobacteria	d__bacteria	TRUE	TRUE	2.9e-08	TRUE	1	GATCACCTCCTTAAT	GAAGGTCTTAGGGGGTATCTTTGA	-9.48051
GCF_000093025.1	s__methylotenera versatilis	g__methylotenera	f__methylophilaceae	o__burkholderiales	c__gammaproteobacteria	p__proteobacteria	d__bacteria	TRUE	TRUE	6.7e-05	TRUE	1	GATCACCTCCTTTCT	AACGACCTTAGGGGGTATCTTTGA	-9.48051
GCF_009363535.1	s__microbulbifer sp009363535	g__microbulbifer	f__cellvibrionaceae	o__pseudomonadales	c__gammaproteobacteria	p__proteobacteria	d__bacteria	TRUE	TRUE	8.2e-10	TRUE	1	GATCACCTCCTTAAA	GACGTTCTTAGGGGGTATCTTTGA	-9.48051
GCF_003076275.1	s__microbulbifer sp003076275	g__microbulbifer	f__cellvibrionaceae	o__pseudomonadales	c__gammaproteobacteria	p__proteobacteria	d__bacteria	TRUE	TRUE	2.1e-09	TRUE	1	GATCACCTCCTTAAA	GACGTTCTTAGGGGGTATCTTTGA	-9.48051
GCF_009903625.1	s__microbulbifer sp009903625	g__microbulbifer	f__cellvibrionaceae	o__pseudomonadales	c__gammaproteobacteria	p__proteobacteria	d__bacteria	TRUE	TRUE	1.2e-09	TRUE	1	GATCACCTCCTTAAA	GACGTTCTCAGGGGGTATCTTTGA	-9.48051
GCF_007183175.1	s__microbulbifer sp007183175	g__microbulbifer	f__cellvibrionaceae	o__pseudomonadales	c__gammaproteobacteria	p__proteobacteria	d__bacteria	TRUE	TRUE	8.2e-10	TRUE	1	GATCACCTCCTTAAA	GACGTTCTTAGGGGGTATCTTTGA	-9.48051
GCF_001750105.1	s__microbulbifer aggregans	g__microbulbifer	f__cellvibrionaceae	o__pseudomonadales	c__gammaproteobacteria	p__proteobacteria	d__bacteria	TRUE	TRUE	2e-09	TRUE	1	GATCACCTCCTTAAA	GGCGTTCTTAGGGGGTATCTTTGA	-9.48051
GCF_013367775.1	s__microbulbifer sp013367775	g__microbulbifer	f__cellvibrionaceae	o__pseudomonadales	c__gammaproteobacteria	p__proteobacteria	d__bacteria	TRUE	TRUE	8.2e-10	TRUE	1	GATCACCTCCTTAAT	GACGTTCTTAGGGGGTATCTTTGA	-9.48051
GCF_001999945.1	s__microbulbifer agarilyticus_a	g__microbulbifer	f__cellvibrionaceae	o__pseudomonadales	c__gammaproteobacteria	p__proteobacteria	d__bacteria	TRUE	TRUE	2e-08	TRUE	1	GATCACCTCCTTAAT	GACGTTCTTAGGGGGTATCTTTGA	-9.48051
GCF_009931115.1	s__microbulbifer hydrolyticus	g__microbulbifer	f__cellvibrionaceae	o__pseudomonadales	c__gammaproteobacteria	p__proteobacteria	d__bacteria	TRUE	TRUE	1.2e-09	TRUE	1	GATCACCTCCTTAAT	GACGTTCTCAGGGGGTATCTTTGA	-9.48051
GCF_009914055.1	s__mixta intestinalis	g__mixta	f__enterobacteriaceae	o__enterobacterales	c__gammaproteobacteria	p__proteobacteria	d__bacteria	TRUE	TRUE	6.8e-10	TRUE	1	GATCACCTCCTTACC	GACGTTCTTAGGGGGTATCTTTGA	-9.48051
GCF_002953215.1	s__mixta calida	g__mixta	f__enterobacteriaceae	o__enterobacterales	c__gammaproteobacteria	p__proteobacteria	d__bacteria	TRUE	TRUE	6.8e-10	TRUE	1	GATCACCTCCTTACC	GACGTTCTTAGGGGGTATCTTTGA	-9.48051
GCF_002953195.1	s__mixta gaviniae	g__mixta	f__enterobacteriaceae	o__enterobacterales	c__gammaproteobacteria	p__proteobacteria	d__bacteria	TRUE	TRUE	6.8e-10	TRUE	1	GATCACCTCCTTACC	GACGTTCTTAGGGGGTATCTTTGA	-9.48051
GCF_002101395.1	s__mixta alhagi	g__mixta	f__enterobacteriaceae	o__enterobacterales	c__gammaproteobacteria	p__proteobacteria	d__bacteria	TRUE	TRUE	6.8e-10	TRUE	1	GATCACCTCCTTACC	GACGTTCTTAGGGGGTATCTTTGA	-9.48051
GCF_005154805.1	s__neobacillus sp005154805	g__neobacillus	f__dsm-18226	o__bacillales_b	c__bacilli	p__firmicutes	d__bacteria	TRUE	TRUE	3e-07	TRUE	1	GATCACCTCCTTTCT	GCGGACTTTAGGGGGTCTCTTTGA	-9.48051
GCF_003726095.1	s__niallia circulans_a	g__niallia	f__dsm-18226	o__bacillales_b	c__bacilli	p__firmicutes	d__bacteria	TRUE	TRUE	4e-06	TRUE	1	GATCACCTCCTTTCT	GAAAACTTTAGGGGGTCTCTTTGA	-9.48051
GCF_002005165.1	s__novibacillus thermophilus	g__novibacillus	f__novibacillaceae	o__thermoactinomycetales	c__bacilli	p__firmicutes	d__bacteria	TRUE	TRUE	1.1e-05	TRUE	1	GATCACCTCCTTTCT	GCGGAAATCAGGGGGTCTCTTTGA	-9.48051
GCF_002117105.1	s__oceanicoccus sagamiensis	g__oceanicoccus	f__dsm-21967	o__pseudomonadales	c__gammaproteobacteria	p__proteobacteria	d__bacteria	TRUE	TRUE	3.6e-08	TRUE	1	GATCACCTCCTTAAC	GAAGTCCTTAGGGGGTATCTTTGA	-9.48051
GCF_000243075.1	s__oceanimonas sp000243075	g__oceanimonas	f__aeromonadaceae	o__enterobacterales	c__gammaproteobacteria	p__proteobacteria	d__bacteria	TRUE	TRUE	4.2e-09	TRUE	1	GATCACCTCCTTACC	CAGCTTCTTAGGGGGTACCTTTGA	-9.48051
GCF_002157895.1	s__oceanisphaera profunda	g__oceanisphaera	f__aeromonadaceae	o__enterobacterales	c__gammaproteobacteria	p__proteobacteria	d__bacteria	TRUE	TRUE	8.4e-10	TRUE	1	GATCACCTCCTTACC	GAGCTTCTTAGGGGGTACCTTTGA	-9.48051
GCF_002157875.1	s__oceanisphaera avium	g__oceanisphaera	f__aeromonadaceae	o__enterobacterales	c__gammaproteobacteria	p__proteobacteria	d__bacteria	TRUE	TRUE	5.9e-10	TRUE	1	GATCACCTCCTTACC	CAGCTTCTTAGGGGGTACCTTTGA	-9.48051
GCF_003352005.1	s__oceanobacillus zhaokaii	g__oceanobacillus	f__amphibacillaceae	o__bacillales_d	c__bacilli	p__firmicutes	d__bacteria	TRUE	TRUE	3.1e-06	TRUE	1	GATCACCTCCTTTCT	GAAGACTTTAGGGGGTCTCTTTGA	-9.48051
GCF_000011245.1	s__oceanobacillus iheyensis	g__oceanobacillus	f__amphibacillaceae	o__bacillales_d	c__bacilli	p__firmicutes	d__bacteria	TRUE	TRUE	2.8e-08	TRUE	1	GATCACCTCCTTTCT	GAAGATTTTAGGGGGTCTCTTTGA	-9.48051
GCF_004102045.2	s__oenococcus sicerae	g__oenococcus	f__lactobacillaceae	o__lactobacillales	c__bacilli	p__firmicutes	d__bacteria	TRUE	TRUE	5e-07	TRUE	1	GATCACCTCCTTTCT	GACGGTTTTAGGGGGTCGCTTTGA	-9.48051
GCF_002162375.1	s__oleiphilus messinensis	g__oleiphilus	f__oleiphilaceae	o__pseudomonadales	c__gammaproteobacteria	p__proteobacteria	d__bacteria	TRUE	TRUE	5.4e-09	TRUE	1	GATCACCTCCTTAAA	GAGACCCTTAGGGGGTACCTTTGA	-9.48051
GCF_009684715.1	s__otariodibacter oris	g__otariodibacter	f__pasteurellaceae	o__enterobacterales	c__gammaproteobacteria	p__proteobacteria	d__bacteria	TRUE	TRUE	5.7e-09	TRUE	1	GATCACCTCCTTACC	CGAGTACTTAGGGGGTATCTTTGA	-9.48051
GCF_000758585.1	s__paenibacillus sp000758585	g__paenibacillus	f__paenibacillaceae	o__paenibacillales	c__bacilli	p__firmicutes	d__bacteria	TRUE	TRUE	0.00057	TRUE	1	GATCACCTCCTTTCT	ACTGACCTTAGGGGGTCTCTTTGA	-9.48051
GCF_008386395.1	s__paenibacillus amylolyticus_b	g__paenibacillus	f__paenibacillaceae	o__paenibacillales	c__bacilli	p__firmicutes	d__bacteria	TRUE	TRUE	0.013	TRUE	1	GATCACCTCCTTTCT	ACAAACCTTAGGGGGTCTCTTTGA	-9.48051
GCF_000758525.1	s__paenibacillus sp000758525	g__paenibacillus	f__paenibacillaceae	o__paenibacillales	c__bacilli	p__firmicutes	d__bacteria	TRUE	TRUE	0.0032	TRUE	1	GATCACCTCCTTTCT	ACCAACCTTAGGGGGTCTCTTTGA	-9.48051
GCF_000758705.1	s__paenibacillus graminis	g__paenibacillus	f__paenibacillaceae	o__paenibacillales	c__bacilli	p__firmicutes	d__bacteria	TRUE	TRUE	0.0025	TRUE	1	GATCACCTCCTTTCT	ACAGACCTTAGGGGGTCTCTTTGA	-9.48051
GCF_002240415.1	s__paenibacillus kribbensis	g__paenibacillus	f__paenibacillaceae	o__paenibacillales	c__bacilli	p__firmicutes	d__bacteria	TRUE	TRUE	0.026	TRUE	1	GATCACCTCCTTTCT	ACAAACCTTAGGGGGTCTCTTTGA	-9.48051
GCF_000758545.1	s__paenibacillus sp000758545	g__paenibacillus	f__paenibacillaceae	o__paenibacillales	c__bacilli	p__firmicutes	d__bacteria	TRUE	TRUE	0.00046	TRUE	1	GATCACCTCCTTTCT	ACTGACCTTAGGGGGTCTCTTTGA	-9.48051
GCF_009363095.1	s__paenibacillus cellulositrophicus_a	g__paenibacillus	f__paenibacillaceae	o__paenibacillales	c__bacilli	p__firmicutes	d__bacteria	TRUE	TRUE	0.017	TRUE	1	GATCACCTCCTTTCT	ACCAATCTTAGGGGGTCTCTTTGA	-9.48051
GCF_000993825.1	s__paenibacillus durus_b	g__paenibacillus	f__paenibacillaceae	o__paenibacillales	c__bacilli	p__firmicutes	d__bacteria	TRUE	TRUE	0.0043	TRUE	1	GATCACCTCCTTTCT	ACTAACCTTAGGGGGTCTCTTTGA	-9.48051
GCF_000981585.1	s__paenibacillus riograndensis	g__paenibacillus	f__paenibacillaceae	o__paenibacillales	c__bacilli	p__firmicutes	d__bacteria	TRUE	TRUE	0.0025	TRUE	1	GATCACCTCCTTTCT	ACTGACCTTAGGGGGTCTCTTTGA	-9.48051
GCF_000949425.1	s__paenibacillus sp000949425	g__paenibacillus	f__paenibacillaceae	o__paenibacillales	c__bacilli	p__firmicutes	d__bacteria	TRUE	TRUE	0.0083	TRUE	1	GATCACCTCCTTTCT	ACCAACCTTAGGGGGTCTCTTTGA	-9.48051
GCF_009363115.1	s__paenibacillus brasilensis	g__paenibacillus	f__paenibacillaceae	o__paenibacillales	c__bacilli	p__firmicutes	d__bacteria	TRUE	TRUE	0.019	TRUE	1	GATCACCTCCTTTCT	ACAAACCTTAGGGGGTCTCTTTGA	-9.48051
GCF_000237325.1	s__paenibacillus polymyxa_c	g__paenibacillus	f__paenibacillaceae	o__paenibacillales	c__bacilli	p__firmicutes	d__bacteria	TRUE	TRUE	0.019	TRUE	1	GATCACCTCCTTTCT	ACAAACCTTAGGGGGTCTCTTTGA	-9.48051
GCF_001908275.1	s__paenibacillus xylanexedens_a	g__paenibacillus	f__paenibacillaceae	o__paenibacillales	c__bacilli	p__firmicutes	d__bacteria	TRUE	TRUE	0.013	TRUE	1	GATCACCTCCTTTCT	ACAAACCTTAGGGGGTCTCTTTGA	-9.48051
GCF_014844075.1	s__paenibacillus sp014844075	g__paenibacillus	f__paenibacillaceae	o__paenibacillales	c__bacilli	p__firmicutes	d__bacteria	TRUE	TRUE	0.0043	TRUE	1	GATCACCTCCTTTCT	ACAAATCTTAGGGGGTCTCTTTGA	-9.48051
GCF_015710975.1	s__paenibacillus polymyxa	g__paenibacillus	f__paenibacillaceae	o__paenibacillales	c__bacilli	p__firmicutes	d__bacteria	TRUE	TRUE	0.019	TRUE	1	GATCACCTCCTTTCT	ACAAACCTTAGGGGGTCTCTTTGA	-9.48051
GCF_000758625.1	s__paenibacillus sp000758625	g__paenibacillus	f__paenibacillaceae	o__paenibacillales	c__bacilli	p__firmicutes	d__bacteria	TRUE	TRUE	0.0071	TRUE	1	GATCACCTCCTTTCT	ACCAACCTTAGGGGGTCTCTTTGA	-9.48051
GCF_000756615.1	s__paenibacillus durus	g__paenibacillus	f__paenibacillaceae	o__paenibacillales	c__bacilli	p__firmicutes	d__bacteria	TRUE	TRUE	0.0043	TRUE	1	GATCACCTCCTTTCT	ACTAACCTTAGGGGGTCTCTTTGA	-9.48051
GCF_000758685.1	s__paenibacillus stellifer	g__paenibacillus	f__paenibacillaceae	o__paenibacillales	c__bacilli	p__firmicutes	d__bacteria	TRUE	TRUE	0.006	TRUE	1	GATCACCTCCTTTCT	ACCAACCTTAGGGGGTCTCTTTGA	-9.48051
GCF_017086365.1	s__paenibacillus sp017086365	g__paenibacillus	f__paenibacillaceae	o__paenibacillales	c__bacilli	p__firmicutes	d__bacteria	TRUE	TRUE	0.003	TRUE	1	GATCACCTCCTTTCT	ACCAACCTTAGGGGGTCTCTTTGA	-9.48051
GCF_018966525.1	s__paenibacillus sophorae	g__paenibacillus	f__paenibacillaceae	o__paenibacillales	c__bacilli	p__firmicutes	d__bacteria	TRUE	TRUE	0.0035	TRUE	1	GATCACCTCCTTTCT	ACTAACCTTAGGGGGTCTCTTTGA	-9.48051
GCF_005577435.1	s__paenibacillus sp005577435	g__paenibacillus	f__paenibacillaceae	o__paenibacillales	c__bacilli	p__firmicutes	d__bacteria	TRUE	TRUE	0.0015	TRUE	1	GATCACCTCCTTTCT	ACCAACCTTAGGGGGTCTCTTTGA	-9.48051
GCF_001857945.1	s__paenibacillus crassostreae	g__paenibacillus	f__paenibacillaceae	o__paenibacillales	c__bacilli	p__firmicutes	d__bacteria	TRUE	TRUE	0.012	TRUE	1	GATCACCTCCTTTCT	ACCAATCTTAGGGGGTCTCTTTGA	-9.48051
GCF_000758605.1	s__paenibacillus sp000758605	g__paenibacillus	f__paenibacillaceae	o__paenibacillales	c__bacilli	p__firmicutes	d__bacteria	TRUE	TRUE	0.0029	TRUE	1	GATCACCTCCTTTCT	ACCAATCTTAGGGGGTCACTTTGA	-9.48051
GCF_001719045.1	s__paenibacillus polymyxa_b	g__paenibacillus	f__paenibacillaceae	o__paenibacillales	c__bacilli	p__firmicutes	d__bacteria	TRUE	TRUE	0.019	TRUE	1	GATCACCTCCTTTCT	ACAAACCTTAGGGGGTCTCTTTGA	-9.48051
GCF_000612505.1	s__paenibacillus sabinae	g__paenibacillus	f__paenibacillaceae	o__paenibacillales	c__bacilli	p__firmicutes	d__bacteria	TRUE	TRUE	0.0043	TRUE	1	GATCACCTCCTTTCT	ACCAACCTTAGGGGGTCTCTTTGA	-9.48051
GCF_002192415.1	s__paenibacillus donghaensis	g__paenibacillus	f__paenibacillaceae	o__paenibacillales	c__bacilli	p__firmicutes	d__bacteria	TRUE	TRUE	0.0023	TRUE	1	GATCACCTCCTTTCT	ACCGACCTTAGGGGGTCTCTTTGA	-9.48051
GCF_000758725.1	s__paenibacillus odorifer	g__paenibacillus	f__paenibacillaceae	o__paenibacillales	c__bacilli	p__firmicutes	d__bacteria	TRUE	TRUE	0.00057	TRUE	1	GATCACCTCCTTTCT	ACTGACCTTAGGGGGTCTCTTTGA	-9.48051
GCF_000758665.1	s__paenibacillus borealis	g__paenibacillus	f__paenibacillaceae	o__paenibacillales	c__bacilli	p__firmicutes	d__bacteria	TRUE	TRUE	0.0029	TRUE	1	GATCACCTCCTTTCT	ACCAATCTTAGGGGGTCACTTTGA	-9.48051
GCF_002741055.1	s__paenibacillus ihbetae	g__paenibacillus	f__paenibacillaceae	o__paenibacillales	c__bacilli	p__firmicutes	d__bacteria	TRUE	TRUE	0.0018	TRUE	1	GATCACCTCCTTTCT	ACCAATCTTAGGGGGTCTCTTTGA	-9.48051
GCF_000235585.1	s__paenibacillus terrae_b	g__paenibacillus	f__paenibacillaceae	o__paenibacillales	c__bacilli	p__firmicutes	d__bacteria	TRUE	TRUE	0.013	TRUE	1	GATCACCTCCTTTCT	ACAAACCTTAGGGGGTCTCTTTGA	-9.48051
GCF_016772475.1	s__paenibacillus sonchi	g__paenibacillus	f__paenibacillaceae	o__paenibacillales	c__bacilli	p__firmicutes	d__bacteria	TRUE	TRUE	0.0025	TRUE	1	GATCACCTCCTTTCT	ACTGACCTTAGGGGGTCTCTTTGA	-9.48051
GCF_015326965.1	s__paenibacillus sp001860525	g__paenibacillus	f__paenibacillaceae	o__paenibacillales	c__bacilli	p__firmicutes	d__bacteria	TRUE	TRUE	0.0018	TRUE	1	GATCACCTCCTTTCT	ACCAATCTTAGGGGGTCTCTTTGA	-9.48051
GCF_014863545.1	s__paenibacillus lautus_a	g__paenibacillus	f__paenibacillaceae	o__paenibacillales	c__bacilli	p__firmicutes	d__bacteria	TRUE	TRUE	0.0018	TRUE	1	GATCACCTCCTTTCT	ACCAATCTTAGGGGGTCTCTTTGA	-9.48051
GCF_001685395.1	s__paenibacillus_a yonginensis	g__paenibacillus_a	f__paenibacillaceae	o__paenibacillales	c__bacilli	p__firmicutes	d__bacteria	TRUE	TRUE	0.0044	TRUE	1	GATCACCTCCTTTCT	ACCAATCTTAGGGGGTCTCTTTGA	-9.48051
GCF_003060825.1	s__paenibacillus_a sp003060825	g__paenibacillus_a	f__paenibacillaceae	o__paenibacillales	c__bacilli	p__firmicutes	d__bacteria	TRUE	TRUE	0.0015	TRUE	1	GATCACCTCCTTTCT	TCAAACCTTAGGGGGTCTCTTTGA	-9.48051
GCF_003931855.1	s__paenibacillus_a lentus	g__paenibacillus_a	f__paenibacillaceae	o__paenibacillales	c__bacilli	p__firmicutes	d__bacteria	TRUE	TRUE	0.0032	TRUE	1	GATCACCTCCTTTCT	TCCAACCTTAGGGGGTCTCTTTGA	-9.48051
GCF_003991425.1	s__paenibacillus_a lutimineralis	g__paenibacillus_a	f__paenibacillaceae	o__paenibacillales	c__bacilli	p__firmicutes	d__bacteria	TRUE	TRUE	0.035	TRUE	1	GATCACCTCCTTTCT	ACTAATCTTAGGGGGTCTCTTTGA	-9.48051
GCF_004135365.1	s__paenibacillus_c protaetiae	g__paenibacillus_c	f__paenibacillaceae	o__paenibacillales	c__bacilli	p__firmicutes	d__bacteria	TRUE	TRUE	0.0016	TRUE	1	GATCACCTCCTTTCT	CAAGAACTCAGGGGGTCTCTTTGA	-9.48051
GCF_002741035.1	s__paenibacillus_c sp002741035	g__paenibacillus_c	f__paenibacillaceae	o__paenibacillales	c__bacilli	p__firmicutes	d__bacteria	TRUE	TRUE	3.6e-05	TRUE	1	GATCACCTCCTTTCT	CAAGATCTCAGGGGGTCTCTTTGA	-9.48051
GCF_000250655.1	s__paenibacillus_g mucilaginosus	g__paenibacillus_g	f__nbrc-103111	o__paenibacillales	c__bacilli	p__firmicutes	d__bacteria	TRUE	TRUE	0.0076	TRUE	1	GATCACCTCCTTTCT	GCTGAGCTTAGGGGGTCTCTTTGA	-9.48051
GCF_002003265.1	s__paenibacillus_h larvae	g__paenibacillus_h	f__nbrc-103111	o__paenibacillales	c__bacilli	p__firmicutes	d__bacteria	TRUE	TRUE	0.014	TRUE	1	GATCACCTCCTTTCT	ACTCAACTTAGGGGGTCTCTTTGA	-9.48051
GCF_001421015.2	s__paenibacillus_j bovis	g__paenibacillus_j	f__paenibacillaceae	o__paenibacillales	c__bacilli	p__firmicutes	d__bacteria	TRUE	TRUE	0.0018	TRUE	1	GATCACCTCCTTTCT	TCCAACCTTAGGGGGTCTCTTTGA	-9.48051
GCF_009363075.1	s__paenibacillus_k guangzhouensis	g__paenibacillus_k	f__paenibacillaceae	o__paenibacillales	c__bacilli	p__firmicutes	d__bacteria	TRUE	TRUE	0.00011	TRUE	1	GATCACCTCCTTTCT	TCTGACCTTAGGGGGTCTCTTTGA	-9.48051
GCF_001644605.1	s__paenibacillus_n swuensis	g__paenibacillus_n	f__dy6	o__paenibacillales	c__bacilli	p__firmicutes	d__bacteria	TRUE	TRUE	0.00017	TRUE	1	GATCACCTCCTTTCT	CAAGCCCTTAGGGGGTCTCTTTGA	-9.48051
GCF_012676905.1	s__paenibacillus_o sp012676905	g__paenibacillus_o	f__paenibacillaceae	o__paenibacillales	c__bacilli	p__firmicutes	d__bacteria	TRUE	TRUE	0.0028	TRUE	1	GATCACCTCCTTTCT	CAAGATCTCAGGGGGTCTCTTTGA	-9.48051
GCF_000961095.1	s__paenibacillus_o beijingensis	g__paenibacillus_o	f__paenibacillaceae	o__paenibacillales	c__bacilli	p__firmicutes	d__bacteria	TRUE	TRUE	0.00048	TRUE	1	GATCACCTCCTTTCT	CAAGAACTCAGGGGGTCTCTTTGA	-9.48051
GCF_002243345.2	s__paenibacillus_o sp002243345	g__paenibacillus_o	f__paenibacillaceae	o__paenibacillales	c__bacilli	p__firmicutes	d__bacteria	TRUE	TRUE	0.004	TRUE	1	GATCACCTCCTTTCT	CAAGCTCTCAGGGGGTCTCTTTGA	-9.48051
GCF_010365285.1	s__paenibacillus_z rhizovicinus	g__paenibacillus_z	f__paenibacillaceae	o__paenibacillales	c__bacilli	p__firmicutes	d__bacteria	TRUE	TRUE	0.0014	TRUE	1	GATCACCTCCTTTCT	CAAGAACTCAGGGGGTCTCTTTGA	-9.48051
GCF_003945345.1	s__paenibacillus_z baekrokdamisoli	g__paenibacillus_z	f__paenibacillaceae	o__paenibacillales	c__bacilli	p__firmicutes	d__bacteria	TRUE	TRUE	0.0017	TRUE	1	GATCACCTCCTTTCT	CAAGAGCTTAGGGGGTCACTTTGA	-9.48051
GCF_010119935.1	s__paenibacillus_z lycopersici	g__paenibacillus_z	f__paenibacillaceae	o__paenibacillales	c__bacilli	p__firmicutes	d__bacteria	TRUE	TRUE	0.0019	TRUE	1	GATCACCTCCTTTCT	CAAGAACTCAGGGGGTCTCTTTGA	-9.48051
GCF_003952225.1	s__paenibacillus_z albus	g__paenibacillus_z	f__paenibacillaceae	o__paenibacillales	c__bacilli	p__firmicutes	d__bacteria	TRUE	TRUE	0.0001	TRUE	1	GATCACCTCCTTTCT	CAAGAACTCAGGGGGTCTCTTTGA	-9.48051
GCF_004367585.1	s__paenisporosarcina antarctica	g__paenisporosarcina	f__planococcaceae	o__bacillales_a	c__bacilli	p__firmicutes	d__bacteria	TRUE	TRUE	4.9e-06	TRUE	1	GATCACCTCCTTTCT	TCAGACTTTAGGGGGTCTCTTTGA	-9.48051
GCF_000815105.2	s__pandoraea pulmonicola	g__pandoraea	f__burkholderiaceae	o__burkholderiales	c__gammaproteobacteria	p__proteobacteria	d__bacteria	TRUE	TRUE	6e-07	TRUE	1	GATCACCTCCTTTCT	GGCGAGCTCAGGGGGTATCTTTGA	-9.48051
GCF_000934605.2	s__pandoraea vervacti	g__pandoraea	f__burkholderiaceae	o__burkholderiales	c__gammaproteobacteria	p__proteobacteria	d__bacteria	TRUE	TRUE	1.4e-06	TRUE	1	GATCACCTCCTTTCT	GGCGAGCTCAGGGGGTATCTTTGA	-9.48051
GCF_000807775.2	s__pandoraea fibrosis	g__pandoraea	f__burkholderiaceae	o__burkholderiales	c__gammaproteobacteria	p__proteobacteria	d__bacteria	TRUE	TRUE	1.4e-06	TRUE	1	GATCACCTCCTTTCT	GGCGAGCTCAGGGGGTATCTTTGA	-9.48051
GCF_001465595.2	s__pandoraea apista	g__pandoraea	f__burkholderiaceae	o__burkholderiales	c__gammaproteobacteria	p__proteobacteria	d__bacteria	TRUE	TRUE	1.4e-06	TRUE	1	GATCACCTCCTTTCT	GGCGAGCTCAGGGGGTATCTTTGA	-9.48051
GCF_000972785.3	s__pandoraea oxalativorans	g__pandoraea	f__burkholderiaceae	o__burkholderiales	c__gammaproteobacteria	p__proteobacteria	d__bacteria	TRUE	TRUE	1.4e-06	TRUE	1	GATCACCTCCTTTCT	GGCGAGCTCAGGGGGTATCTTTGA	-9.48051
GCF_001029105.3	s__pandoraea faecigallinarum	g__pandoraea	f__burkholderiaceae	o__burkholderiales	c__gammaproteobacteria	p__proteobacteria	d__bacteria	TRUE	TRUE	1.4e-06	TRUE	1	GATCACCTCCTTTCT	GGCGAGCTCAGGGGGTATCTTTGA	-9.48051
GCF_000767615.3	s__pandoraea pnomenusa	g__pandoraea	f__burkholderiaceae	o__burkholderiales	c__gammaproteobacteria	p__proteobacteria	d__bacteria	TRUE	TRUE	1.4e-06	TRUE	1	GATCACCTCCTTTCT	GGCGAGCTCAGGGGGTATCTTTGA	-9.48051
GCF_000814845.2	s__pandoraea sputorum	g__pandoraea	f__burkholderiaceae	o__burkholderiales	c__gammaproteobacteria	p__proteobacteria	d__bacteria	TRUE	TRUE	1.4e-06	TRUE	1	GATCACCTCCTTTCT	GGCGAGCTCAGGGGGTATCTTTGA	-9.48051
GCF_001465545.3	s__pandoraea norimbergensis	g__pandoraea	f__burkholderiaceae	o__burkholderiales	c__gammaproteobacteria	p__proteobacteria	d__bacteria	TRUE	TRUE	1.4e-06	TRUE	1	GATCACCTCCTTTCT	GGCGAGCTCAGGGGGTATCTTTGA	-9.48051
GCF_000175935.2	s__pantoea sp000175935	g__pantoea	f__enterobacteriaceae	o__enterobacterales	c__gammaproteobacteria	p__proteobacteria	d__bacteria	TRUE	TRUE	6.8e-10	TRUE	1	GATCACCTCCTTACC	GACGTTCTTAGGGGGTATCTTTGA	-9.48051
GCF_007833795.1	s__pantoea dispersa_b	g__pantoea	f__enterobacteriaceae	o__enterobacterales	c__gammaproteobacteria	p__proteobacteria	d__bacteria	TRUE	TRUE	1.2e-09	TRUE	1	GATCACCTCCTTACC	GGCGTTCTTAGGGGGTATCTTTGA	-9.48051
GCF_001506165.1	s__pantoea vagans_c	g__pantoea	f__enterobacteriaceae	o__enterobacterales	c__gammaproteobacteria	p__proteobacteria	d__bacteria	TRUE	TRUE	4.7e-10	TRUE	1	GATCACCTCCTTACC	GACGTTCTTAGGGGGTATCTTTGA	-9.48051
GCF_000759475.1	s__pantoea rwandensis_b	g__pantoea	f__enterobacteriaceae	o__enterobacterales	c__gammaproteobacteria	p__proteobacteria	d__bacteria	TRUE	TRUE	6.8e-10	TRUE	1	GATCACCTCCTTACC	GACGTTCTTAGGGGGTATCTTTGA	-9.48051
GCF_003268595.1	s__paraliobacillus_a zengyii	g__paraliobacillus_a	f__amphibacillaceae	o__bacillales_d	c__bacilli	p__firmicutes	d__bacteria	TRUE	TRUE	7.3e-07	TRUE	1	GATCACCTCCTTTCT	ACAGACTTTAGGGGGTCTCTTTGA	-9.48051
GCF_004358445.1	s__parashewanella tropica	g__parashewanella	f__shewanellaceae	o__enterobacterales	c__gammaproteobacteria	p__proteobacteria	d__bacteria	TRUE	TRUE	7.5e-10	TRUE	1	GATCACCTCCTTATC	GATCTTCTTAGGGGGTACCTTTGA	-9.48051
GCF_000973525.1	s__pasteurella multocida_a	g__pasteurella	f__pasteurellaceae	o__enterobacterales	c__gammaproteobacteria	p__proteobacteria	d__bacteria	TRUE	TRUE	1.8e-10	TRUE	1	GATCACCTCCTTACC	CAGGTACTCAGGGGGTATCTTTGA	-9.48051
GCF_002307355.1	s__pectobacterium polaris	g__pectobacterium	f__enterobacteriaceae	o__enterobacterales	c__gammaproteobacteria	p__proteobacteria	d__bacteria	TRUE	TRUE	5.3e-10	TRUE	1	GATCACCTCCTTACC	GCCGTTCTTAGGGGGTATCTTTGA	-9.48051
GCF_015689195.1	s__pectobacterium aroidearum	g__pectobacterium	f__enterobacteriaceae	o__enterobacterales	c__gammaproteobacteria	p__proteobacteria	d__bacteria	TRUE	TRUE	5.3e-10	TRUE	1	GATCACCTCCTTACC	GCCGTTCTTAGGGGGTATCTTTGA	-9.48051
GCF_000237995.1	s__pediococcus claussenii	g__pediococcus	f__lactobacillaceae	o__lactobacillales	c__bacilli	p__firmicutes	d__bacteria	TRUE	TRUE	4.8e-06	TRUE	1	GATCACCTCCTTTCT	CAAGACTTTAGGGGGTCTCTTTGA	-9.48051
GCF_009833965.1	s__pelistega ratti	g__pelistega	f__burkholderiaceae	o__burkholderiales	c__gammaproteobacteria	p__proteobacteria	d__bacteria	TRUE	TRUE	0.00032	TRUE	1	GATCACCTCCTTTAA	AAATCGCTTAGGGGGTATCTTTGA	-9.48051
GCF_002243645.1	s__peribacillus simplex	g__peribacillus	f__dsm-1321	o__bacillales_b	c__bacilli	p__firmicutes	d__bacteria	TRUE	TRUE	1.9e-07	TRUE	1	GATCACCTCCTTTCT	ACGGACTTTAGGGGGTCTCTTTGA	-9.48051
GCF_001645685.2	s__peribacillus muralis_a	g__peribacillus	f__dsm-1321	o__bacillales_b	c__bacilli	p__firmicutes	d__bacteria	TRUE	TRUE	9e-07	TRUE	1	GATCACCTCCTTTCT	ACGGACTTTAGGGGGTCTCTTTGA	-9.48051
GCF_004006295.1	s__peribacillus asahii_a	g__peribacillus	f__dsm-1321	o__bacillales_b	c__bacilli	p__firmicutes	d__bacteria	TRUE	TRUE	1.4e-07	TRUE	1	GATCACCTCCTTTCT	GCGGACTTTAGGGGGTCTCTTTGA	-9.48051
GCF_001578185.1	s__peribacillus simplex_a	g__peribacillus	f__dsm-1321	o__bacillales_b	c__bacilli	p__firmicutes	d__bacteria	TRUE	TRUE	1.9e-07	TRUE	1	GATCACCTCCTTTCT	ACGGACTTTAGGGGGTCTCTTTGA	-9.48051
GCF_013377295.1	s__phocoenobacter skyensis	g__phocoenobacter	f__pasteurellaceae	o__enterobacterales	c__gammaproteobacteria	p__proteobacteria	d__bacteria	TRUE	TRUE	7.8e-10	TRUE	1	GATCACCTCCTTACC	CAAGTGATCAGGGGGTATCTTTGA	-9.48051
GCF_018343795.1	s__phocoenobacter atlantica	g__phocoenobacter	f__pasteurellaceae	o__enterobacterales	c__gammaproteobacteria	p__proteobacteria	d__bacteria	TRUE	TRUE	9.7e-10	TRUE	1	GATCACCTCCTTACC	CAAGTTATCAGGGGGTATCTTTGA	-9.48051
GCF_000940995.1	s__photobacterium gaetbulicola	g__photobacterium	f__vibrionaceae	o__enterobacterales	c__gammaproteobacteria	p__proteobacteria	d__bacteria	TRUE	TRUE	2.3e-09	TRUE	1	GATCACCTCCTTAAC	GATGTCCTTAGGGGGTACCTTTGA	-9.48051
GCF_000196255.1	s__photobacterium profundum_a	g__photobacterium	f__vibrionaceae	o__enterobacterales	c__gammaproteobacteria	p__proteobacteria	d__bacteria	TRUE	TRUE	1.3e-08	TRUE	1	GATCACCTCCTTACC	GACATCCTTAGGGGGTACCTTTGA	-9.48051
GCF_001186155.3	s__planococcus versutus	g__planococcus	f__planococcaceae	o__bacillales_a	c__bacilli	p__firmicutes	d__bacteria	TRUE	TRUE	2.3e-06	TRUE	1	GATCACCTCCTTTCT	GCCGACTTTAGGGGGTCTCTTTGA	-9.48051
GCF_001687625.2	s__planococcus maritimus	g__planococcus	f__planococcaceae	o__bacillales_a	c__bacilli	p__firmicutes	d__bacteria	TRUE	TRUE	5.4e-07	TRUE	1	GATCACCTCCTTTCT	GCGGACTTTAGGGGGTCTCTTTGA	-9.48051
GCF_001687605.2	s__planococcus plakortidis	g__planococcus	f__planococcaceae	o__bacillales_a	c__bacilli	p__firmicutes	d__bacteria	TRUE	TRUE	4.2e-07	TRUE	1	GATCACCTCCTTTCT	GCGGACTTCAGGGGGTCTCTTTGA	-9.48051
GCF_002833405.1	s__planococcus sp002833405	g__planococcus	f__planococcaceae	o__bacillales_a	c__bacilli	p__firmicutes	d__bacteria	TRUE	TRUE	6.1e-07	TRUE	1	GATCACCTCCTTTCT	GCGGACTTCAGGGGGTCTCTTTGA	-9.48051
GCF_001687565.2	s__planococcus antarcticus	g__planococcus	f__planococcaceae	o__bacillales_a	c__bacilli	p__firmicutes	d__bacteria	TRUE	TRUE	4.9e-06	TRUE	1	GATCACCTCCTTTCT	GCGGACTTTAGGGGGTCTCTTTGA	-9.48051
GCF_000785555.1	s__planococcus sp000785555	g__planococcus	f__planococcaceae	o__bacillales_a	c__bacilli	p__firmicutes	d__bacteria	TRUE	TRUE	4.9e-06	TRUE	1	GATCACCTCCTTTCT	GCGGACTTTAGGGGGTCTCTTTGA	-9.48051
GCF_001465835.2	s__planococcus kocurii	g__planococcus	f__planococcaceae	o__bacillales_a	c__bacilli	p__firmicutes	d__bacteria	TRUE	TRUE	4.9e-06	TRUE	1	GATCACCTCCTTTCT	GCCGACTTTAGGGGGTCACTTTGA	-9.48051
GCF_001687665.2	s__planococcus donghaensis	g__planococcus	f__planococcaceae	o__bacillales_a	c__bacilli	p__firmicutes	d__bacteria	TRUE	TRUE	4.6e-06	TRUE	1	GATCACCTCCTTTCT	GCGGACTTTAGGGGGTCTCTTTGA	-9.48051
GCF_001465795.2	s__planococcus rifietoensis	g__planococcus	f__planococcaceae	o__bacillales_a	c__bacilli	p__firmicutes	d__bacteria	TRUE	TRUE	6.1e-07	TRUE	1	GATCACCTCCTTTCT	GCGGACTTCAGGGGGTCTCTTTGA	-9.48051
GCF_001687585.2	s__planococcus halocryophilus	g__planococcus	f__planococcaceae	o__bacillales_a	c__bacilli	p__firmicutes	d__bacteria	TRUE	TRUE	3.4e-06	TRUE	1	GATCACCTCCTTTCT	GCGGACTTTAGGGGGTCTCTTTGA	-9.48051
GCF_000015505.1	s__polaromonas naphthalenivorans	g__polaromonas	f__burkholderiaceae	o__burkholderiales	c__gammaproteobacteria	p__proteobacteria	d__bacteria	TRUE	TRUE	9.6e-09	TRUE	1	GATCACCTCCTTTCT	AATGAACTCAGGGGGTATCTTTGA	-9.48051
GCF_012584515.1	s__polaromonas vacuolata	g__polaromonas	f__burkholderiaceae	o__burkholderiales	c__gammaproteobacteria	p__proteobacteria	d__bacteria	TRUE	TRUE	3.1e-08	TRUE	1	GATCACCTCCTTTCT	AACGAACTCAGGGGGTATCTTTGA	-9.48051
GCF_018326425.1	s__polycladomyces abyssicola	g__polycladomyces	f__jir-001	o__thermoactinomycetales	c__bacilli	p__firmicutes	d__bacteria	TRUE	TRUE	2.5e-05	TRUE	1	GATCACCTCCTTTCT	GCGGATATCAGGGGGTCTCTTTGA	-9.48051
GCF_009858175.1	s__pontibacillus sp009858175	g__pontibacillus	f__halobacillaceae	o__bacillales_d	c__bacilli	p__firmicutes	d__bacteria	TRUE	TRUE	0.00017	TRUE	1	GATCACCTCCTTTCT	GCGGACTTCAGGGGGTCTCTTTGA	-9.48051
GCF_008935075.1	s__pradoshia sp001685035	g__pradoshia	f__dsm-1321	o__bacillales_b	c__bacilli	p__firmicutes	d__bacteria	TRUE	TRUE	8.1e-08	TRUE	1	GATCACCTCCTTTCT	GCGGACTTTAGGGGGTCTCTTTGA	-9.48051
GCF_000832985.1	s__priestia megaterium	g__priestia	f__bacillaceae_h	o__bacillales	c__bacilli	p__firmicutes	d__bacteria	TRUE	TRUE	2.6e-07	TRUE	1	GATCACCTCCTTTCT	GCGGACTTTAGGGGGTCTCTTTGA	-9.48051
GCF_009497655.1	s__priestia megaterium_a	g__priestia	f__bacillaceae_h	o__bacillales	c__bacilli	p__firmicutes	d__bacteria	TRUE	TRUE	2.6e-07	TRUE	1	GATCACCTCCTTTCT	GCGGACTTTAGGGGGTCTCTTTGA	-9.48051
GCF_016647575.1	s__proteus mirabilis_b	g__proteus	f__enterobacteriaceae	o__enterobacterales	c__gammaproteobacteria	p__proteobacteria	d__bacteria	TRUE	TRUE	6.8e-08	TRUE	1	GATCACCTCCTTACC	AATGTTCTCAGGGGGTATCTTTGA	-9.48051
GCF_009914335.1	s__proteus sp003144505	g__proteus	f__enterobacteriaceae	o__enterobacterales	c__gammaproteobacteria	p__proteobacteria	d__bacteria	TRUE	TRUE	6.8e-08	TRUE	1	GATCACCTCCTTACC	AATGTTCTCAGGGGGTATCTTTGA	-9.48051
GCF_011045815.1	s__proteus vulgaris_b	g__proteus	f__enterobacteriaceae	o__enterobacterales	c__gammaproteobacteria	p__proteobacteria	d__bacteria	TRUE	TRUE	6.8e-08	TRUE	1	GATCACCTCCTTACC	AATGTTCTCAGGGGGTATCTTTGA	-9.48051
GCF_011046025.1	s__proteus sp011046025	g__proteus	f__enterobacteriaceae	o__enterobacterales	c__gammaproteobacteria	p__proteobacteria	d__bacteria	TRUE	TRUE	6.8e-08	TRUE	1	GATCACCTCCTTACC	AATGTTCTCAGGGGGTATCTTTGA	-9.48051
GCF_011045835.1	s__proteus cibarius	g__proteus	f__enterobacteriaceae	o__enterobacterales	c__gammaproteobacteria	p__proteobacteria	d__bacteria	TRUE	TRUE	6.8e-08	TRUE	1	GATCACCTCCTTACC	AATGTTCTCAGGGGGTATCTTTGA	-9.48051
GCF_010748935.1	s__providencia vermicola_a	g__providencia	f__enterobacteriaceae	o__enterobacterales	c__gammaproteobacteria	p__proteobacteria	d__bacteria	TRUE	TRUE	1.1e-09	TRUE	1	GATCACCTCCTTACC	GCGGTTCTTAGGGGGTATCTTTGA	-9.48051
GCF_001444405.1	s__pseudoalteromonas phenolica	g__pseudoalteromonas	f__alteromonadaceae	o__enterobacterales	c__gammaproteobacteria	p__proteobacteria	d__bacteria	TRUE	TRUE	3e-09	TRUE	1	GATCACCTCCTTAAC	GAGCTGCTTAGGGGGTATCTTTGA	-9.48051
GCF_000788395.1	s__pseudoalteromonas piratica	g__pseudoalteromonas	f__alteromonadaceae	o__enterobacterales	c__gammaproteobacteria	p__proteobacteria	d__bacteria	TRUE	TRUE	4.7e-09	TRUE	1	GATCACCTCCTTATA	GACCAACTTAGGGGGTATCTTTGA	-9.48051
GCF_000238255.3	s__pseudoalteromonas spongiae	g__pseudoalteromonas	f__alteromonadaceae	o__enterobacterales	c__gammaproteobacteria	p__proteobacteria	d__bacteria	TRUE	TRUE	4.7e-09	TRUE	1	GATCACCTCCTTATA	GACCAACTTAGGGGGTATCTTTGA	-9.48051
GCF_002208135.1	s__pseudoalteromonas piscicida_a	g__pseudoalteromonas	f__alteromonadaceae	o__enterobacterales	c__gammaproteobacteria	p__proteobacteria	d__bacteria	TRUE	TRUE	3e-09	TRUE	1	GATCACCTCCTTATA	GAGCTTCTTAGGGGGTATCTTTGA	-9.48051
GCF_002850255.1	s__pseudoalteromonas sp002850255	g__pseudoalteromonas	f__alteromonadaceae	o__enterobacterales	c__gammaproteobacteria	p__proteobacteria	d__bacteria	TRUE	TRUE	3e-09	TRUE	1	GATCACCTCCTTATA	GAGCTTCTTAGGGGGTATCTTTGA	-9.48051
GCF_016695175.1	s__pseudoalteromonas sp002591815	g__pseudoalteromonas	f__alteromonadaceae	o__enterobacterales	c__gammaproteobacteria	p__proteobacteria	d__bacteria	TRUE	TRUE	3e-09	TRUE	1	GATCACCTCCTTATA	GAGCTTCTTAGGGGGTATCTTTGA	-9.48051
GCF_012844345.1	s__pseudomonas_d sp012844345	g__pseudomonas_d	f__pseudomonadaceae	o__pseudomonadales	c__gammaproteobacteria	p__proteobacteria	d__bacteria	TRUE	TRUE	5e-10	TRUE	1	GATCACCTCCTTAAT	GAGACTATCAGGGGGTATCTTTGA	-9.48051
GCF_018140925.1	s__psychrobacillus sp018140925	g__psychrobacillus	f__planococcaceae	o__bacillales_a	c__bacilli	p__firmicutes	d__bacteria	TRUE	TRUE	0.00019	TRUE	1	GATCACCTCCTTTCT	AAAGACTTTAGGGGGTCTCTTTGA	-9.48051
GCF_008973485.1	s__psychrobacillus glaciei	g__psychrobacillus	f__planococcaceae	o__bacillales_a	c__bacilli	p__firmicutes	d__bacteria	TRUE	TRUE	0.00019	TRUE	1	GATCACCTCCTTTCT	GAAGACTTCAGGGGGTCTCTTTGA	-9.48051
GCF_008807035.1	s__psychrobacillus sp008807035	g__psychrobacillus	f__planococcaceae	o__bacillales_a	c__bacilli	p__firmicutes	d__bacteria	TRUE	TRUE	0.00029	TRUE	1	GATCACCTCCTTTCT	AAAGACTTTAGGGGGTCTCTTTGA	-9.48051
GCF_007301515.1	s__radiobacillus deserti	g__radiobacillus	f__amphibacillaceae	o__bacillales_d	c__bacilli	p__firmicutes	d__bacteria	TRUE	TRUE	8.3e-09	TRUE	1	GATCACCTCCTTTCT	GCGGACTTTAGGGGGTCTCTTTGA	-9.48051
GCF_013343005.1	s__reidiella endopervernicosa	g__reidiella		o__gcf-013343005	c__gammaproteobacteria	p__proteobacteria	d__bacteria	TRUE	TRUE	2.1e-08	TRUE	1	GATCACCTCCTTTAA	GATGCCCTTAGGGGGTACCTTTGA	-9.48051
GCF_002795845.1	s__reinekea forsetii	g__reinekea	f__natronospirillaceae	o__pseudomonadales	c__gammaproteobacteria	p__proteobacteria	d__bacteria	TRUE	TRUE	1.2e-09	TRUE	1	GATCACCTCCTTAAA	TCTGTGCTTAGGGGGTATCTTTGA	-9.48051
GCF_013782625.1	s__rhbstw-00994 sp013782625	g__rhbstw-00994	f__enterobacteriaceae	o__enterobacterales	c__gammaproteobacteria	p__proteobacteria	d__bacteria	TRUE	TRUE	6.8e-10	TRUE	1	GATCACCTCCTTACC	GACGTTCTTAGGGGGTATCTTTGA	-9.48051
GCF_000230695.2	s__rhodanobacter denitrificans	g__rhodanobacter	f__rhodanobacteraceae	o__xanthomonadales	c__gammaproteobacteria	p__proteobacteria	d__bacteria	TRUE	TRUE	9.3e-08	TRUE	1	GATCACCTCCTTTCA	GAGTCGCTTAGGGGGTATCTTTGA	-9.48051
GCF_003586445.1	s__robertmurraya sp003586445	g__robertmurraya	f__dsm-18226	o__bacillales_b	c__bacilli	p__firmicutes	d__bacteria	TRUE	TRUE	6.7e-07	TRUE	1	GATCACCTCCTTTCT	GCGGACTTTAGGGGGTCTCTTTGA	-9.48051
GCF_009806575.1	s__rossellomorea marisflavi_a	g__rossellomorea	f__bacillaceae_b	o__bacillales_b	c__bacilli	p__firmicutes	d__bacteria	TRUE	TRUE	1.2e-05	TRUE	1	GATCACCTCCTTTCT	GCGGACTTCAGGGGGTCTCTTTGA	-9.48051
GCF_006542275.1	s__saccharibacillus brassicae	g__saccharibacillus	f__paenibacillaceae	o__paenibacillales	c__bacilli	p__firmicutes	d__bacteria	TRUE	TRUE	0.0048	TRUE	1	GATCACCTCCTTTCT	ACCAACCTTAGGGGGTCACTTTGA	-9.48051
GCF_000013665.1	s__saccharophagus degradans	g__saccharophagus	f__cellvibrionaceae	o__pseudomonadales	c__gammaproteobacteria	p__proteobacteria	d__bacteria	TRUE	TRUE	9e-07	TRUE	1	GATCACCTCCTTAAA	AATGTGCTTAGGGGGTATCTTTGA	-9.48051
GCF_003367315.1	s__saccharospirillum mangrovi	g__saccharospirillum	f__natronospirillaceae	o__pseudomonadales	c__gammaproteobacteria	p__proteobacteria	d__bacteria	TRUE	TRUE	2.5e-10	TRUE	1	GATCACCTCCTTAAA	GACGTGCTTAGGGGGTACCTTTGA	-9.48051
GCF_003336365.1	s__salicibibacter kimchii	g__salicibibacter	f__marinococcaceae	o__bacillales_h	c__bacilli	p__firmicutes	d__bacteria	TRUE	TRUE	3.4e-07	TRUE	1	GATCACCTCCTTTCT	GCGGAATTCAGGGGGTCTCTTTGA	-9.48051
GCF_006740705.1	s__salicibibacter halophilus	g__salicibibacter	f__marinococcaceae	o__bacillales_h	c__bacilli	p__firmicutes	d__bacteria	TRUE	TRUE	2.4e-06	TRUE	1	GATCACCTCCTTTCT	GCGGAATTTAGGGGGTCTCTTTGA	-9.48051
GCF_016495725.1	s__salicibibacter cibarius	g__salicibibacter	f__marinococcaceae	o__bacillales_h	c__bacilli	p__firmicutes	d__bacteria	TRUE	TRUE	3.4e-07	TRUE	1	GATCACCTCCTTTCT	GCGGAATTTAGGGGGTCTCTTTGA	-9.48051
GCF_016495865.1	s__salicibibacter cibi	g__salicibibacter	f__marinococcaceae	o__bacillales_h	c__bacilli	p__firmicutes	d__bacteria	TRUE	TRUE	3.4e-07	TRUE	1	GATCACCTCCTTTCT	GCGGAATTTAGGGGGTCTCTTTGA	-9.48051
GCF_010092505.1	s__salinibacillus sp010092505	g__salinibacillus	f__alkalibacillaceae	o__bacillales_d	c__bacilli	p__firmicutes	d__bacteria	TRUE	TRUE	5.8e-08	TRUE	1	GATCACCTCCTTTCT	GATGACTTTAGGGGGTCTCTTTGA	-9.48051
GCF_003143555.1	s__saliniradius amylolyticus	g__saliniradius	f__alteromonadaceae	o__enterobacterales	c__gammaproteobacteria	p__proteobacteria	d__bacteria	TRUE	TRUE	1.4e-07	TRUE	1	GATCACCTCCTTACG	GAAGCGCTTAGGGGGTATCTTTGA	-9.48051
GCA_000093085.1	s__salisediminibacterium selenitireducens	g__salisediminibacterium	f__salisediminibacteriaceae	o__bacillales_h	c__bacilli	p__firmicutes	d__bacteria	TRUE	TRUE	9.8e-08	TRUE	1	GATCACCTCCTTTCT	GCGGACTTCAGGGGGTCTCTTTGA	-9.48051
GCF_001721685.1	s__salisediminibacterium beveridgei	g__salisediminibacterium	f__salisediminibacteriaceae	o__bacillales_h	c__bacilli	p__firmicutes	d__bacteria	TRUE	TRUE	1.6e-08	TRUE	1	GATCACCTCCTTTCT	GCGGACTTCAGGGGGTCTCTTTGA	-9.48051
GCF_000252995.1	s__salmonella bongori	g__salmonella	f__enterobacteriaceae	o__enterobacterales	c__gammaproteobacteria	p__proteobacteria	d__bacteria	TRUE	TRUE	1.2e-09	TRUE	1	GATCACCTCCTTACC	AACGTTCTTAGGGGGTATCTTTGA	-9.48051
GCF_003963515.1	s__scsio-07484 sp003963515	g__scsio-07484	f__brevibacillaceae	o__brevibacillales	c__bacilli	p__firmicutes	d__bacteria	TRUE	TRUE	9.3e-08	TRUE	1	GATCACCTCCTTTCT	GCGGATATCAGGGGGTCTCTTTGA	-9.48051
GCF_001007875.1	s__sedimenticola thiotaurini	g__sedimenticola	f__sedimenticolaceae	o__chromatiales	c__gammaproteobacteria	p__proteobacteria	d__bacteria	TRUE	TRUE	6e-09	TRUE	1	GATCACCTCCTTTAA	GAGTCCCTTAGGGGGTACCTTTGA	-9.48051
GCF_017792025.1	s__sediminibacillus sp017792025	g__sediminibacillus	f__amphibacillaceae	o__bacillales_d	c__bacilli	p__firmicutes	d__bacteria	TRUE	TRUE	1.1e-08	TRUE	1	GATCACCTCCTTTCT	GCGGACTTCAGGGGGTCTCTTTGA	-9.48051
GCF_018336935.1	s__serratia plymuthica_b	g__serratia	f__enterobacteriaceae	o__enterobacterales	c__gammaproteobacteria	p__proteobacteria	d__bacteria	TRUE	TRUE	3.4e-10	TRUE	1	GATCACCTCCTTACC	GCCGTTCTTAGGGGGTATCTTTGA	-9.48051
GCF_002220655.1	s__serratia marcescens_k	g__serratia	f__enterobacteriaceae	o__enterobacterales	c__gammaproteobacteria	p__proteobacteria	d__bacteria	TRUE	TRUE	3.4e-10	TRUE	1	GATCACCTCCTTACC	GCGGTTCTTAGGGGGTATCTTTGA	-9.48051
GCF_003812745.1	s__serratia sp003812745	g__serratia	f__enterobacteriaceae	o__enterobacterales	c__gammaproteobacteria	p__proteobacteria	d__bacteria	TRUE	TRUE	3.4e-10	TRUE	1	GATCACCTCCTTACC	GCGGTTCTTAGGGGGTATCTTTGA	-9.48051
GCF_001642805.2	s__serratia surfactantfaciens	g__serratia	f__enterobacteriaceae	o__enterobacterales	c__gammaproteobacteria	p__proteobacteria	d__bacteria	TRUE	TRUE	3.4e-10	TRUE	1	GATCACCTCCTTACC	GCGGTTCTTAGGGGGTATCTTTGA	-9.48051
GCF_017299535.1	s__serratia marcescens	g__serratia	f__enterobacteriaceae	o__enterobacterales	c__gammaproteobacteria	p__proteobacteria	d__bacteria	TRUE	TRUE	3.4e-10	TRUE	1	GATCACCTCCTTACC	GCGGTTCTTAGGGGGTATCTTTGA	-9.48051
GCF_000513215.1	s__serratia bockelmannii	g__serratia	f__enterobacteriaceae	o__enterobacterales	c__gammaproteobacteria	p__proteobacteria	d__bacteria	TRUE	TRUE	3.4e-10	TRUE	1	GATCACCTCCTTACC	GCGGTTCTTAGGGGGTATCTTTGA	-9.48051
GCF_900187015.1	s__serratia ficaria	g__serratia	f__enterobacteriaceae	o__enterobacterales	c__gammaproteobacteria	p__proteobacteria	d__bacteria	TRUE	TRUE	3.4e-10	TRUE	1	GATCACCTCCTTACC	GCCGTTCTTAGGGGGTATCTTTGA	-9.48051
GCF_000422085.1	s__serratia liquefaciens	g__serratia	f__enterobacteriaceae	o__enterobacterales	c__gammaproteobacteria	p__proteobacteria	d__bacteria	TRUE	TRUE	3.4e-10	TRUE	1	GATCACCTCCTTACC	GCCGTTCTTAGGGGGTATCTTTGA	-9.48051
GCF_001006005.1	s__serratia_a fonticola	g__serratia_a	f__enterobacteriaceae	o__enterobacterales	c__gammaproteobacteria	p__proteobacteria	d__bacteria	TRUE	TRUE	4.9e-09	TRUE	1	GATCACCTCCTTACC	GCCGTTCTCAGGGGGTATCTTTGA	-9.48051
GCF_009817885.1	s__serratia_b rhizosphaerae	g__serratia_b	f__enterobacteriaceae	o__enterobacterales	c__gammaproteobacteria	p__proteobacteria	d__bacteria	TRUE	TRUE	3.4e-10	TRUE	1	GATCACCTCCTTACC	GCCGTTCTTAGGGGGTATCTTTGA	-9.48051
GCF_900635445.1	s__serratia_f odorifera	g__serratia_f	f__enterobacteriaceae	o__enterobacterales	c__gammaproteobacteria	p__proteobacteria	d__bacteria	TRUE	TRUE	3.4e-10	TRUE	1	GATCACCTCCTTACC	GCCGTTCTTAGGGGGTATCTTTGA	-9.48051
GCF_003957745.1	s__shewanella khirikhana	g__shewanella	f__shewanellaceae	o__enterobacterales	c__gammaproteobacteria	p__proteobacteria	d__bacteria	TRUE	TRUE	1.7e-08	TRUE	1	GATCACCTCCTTACC	TCGCTCCTTAGGGGGTATCTTTGA	-9.48051
GCF_000013765.1	s__shewanella denitrificans	g__shewanella	f__shewanellaceae	o__enterobacterales	c__gammaproteobacteria	p__proteobacteria	d__bacteria	TRUE	TRUE	7.4e-07	TRUE	1	GATCACCTCCTTACC	GTGCTTCTTAGGGGGTATCTTTGA	-9.48051
GCF_000146165.2	s__shewanella oneidensis	g__shewanella	f__shewanellaceae	o__enterobacterales	c__gammaproteobacteria	p__proteobacteria	d__bacteria	TRUE	TRUE	4.5e-09	TRUE	1	GATCACCTCCTTACC	CAGCTTCTTAGGGGGTATCTTTGA	-9.48051
GCF_017354985.1	s__shewanella sp017354985	g__shewanella	f__shewanellaceae	o__enterobacterales	c__gammaproteobacteria	p__proteobacteria	d__bacteria	TRUE	TRUE	6.2e-09	TRUE	1	GATCACCTCCTTACC	GATCTCCTTAGGGGGTATCTTTGA	-9.48051
GCF_016406325.1	s__shewanella putrefaciens	g__shewanella	f__shewanellaceae	o__enterobacterales	c__gammaproteobacteria	p__proteobacteria	d__bacteria	TRUE	TRUE	4.5e-09	TRUE	1	GATCACCTCCTTACC	CAGCTTCTTAGGGGGTATCTTTGA	-9.48051
GCF_000203935.1	s__shewanella sp000203935	g__shewanella	f__shewanellaceae	o__enterobacterales	c__gammaproteobacteria	p__proteobacteria	d__bacteria	TRUE	TRUE	4.5e-09	TRUE	1	GATCACCTCCTTACC	CAGCTTCTTAGGGGGTATCTTTGA	-9.48051
GCF_002216875.1	s__shewanella bicestrii	g__shewanella	f__shewanellaceae	o__enterobacterales	c__gammaproteobacteria	p__proteobacteria	d__bacteria	TRUE	TRUE	4.5e-09	TRUE	1	GATCACCTCCTTACC	CAGCTTCTTAGGGGGTATCTTTGA	-9.48051
GCF_016406305.1	s__shewanella putrefaciens_c	g__shewanella	f__shewanellaceae	o__enterobacterales	c__gammaproteobacteria	p__proteobacteria	d__bacteria	TRUE	TRUE	4.5e-09	TRUE	1	GATCACCTCCTTACC	CAGCTTCTTAGGGGGTATCTTTGA	-9.48051
GCF_006494715.1	s__shewanella sp006494715	g__shewanella	f__shewanellaceae	o__enterobacterales	c__gammaproteobacteria	p__proteobacteria	d__bacteria	TRUE	TRUE	4.5e-09	TRUE	1	GATCACCTCCTTACC	CAGCTTCTTAGGGGGTATCTTTGA	-9.48051
GCF_016834455.1	s__shewanella litorisediminis	g__shewanella	f__shewanellaceae	o__enterobacterales	c__gammaproteobacteria	p__proteobacteria	d__bacteria	TRUE	TRUE	6.7e-08	TRUE	1	GATCACCTCCTTACC	ATGCTCCTTAGGGGGTATCTTTGA	-9.48051
GCF_018223345.1	s__shewanella sp018223345	g__shewanella	f__shewanellaceae	o__enterobacterales	c__gammaproteobacteria	p__proteobacteria	d__bacteria	TRUE	TRUE	2.8e-10	TRUE	1	GATCACCTCCTTACC	GATCTCCTTAGGGGGTATCTTTGA	-9.48051
GCF_002966515.1	s__shewanella sp002966515	g__shewanella	f__shewanellaceae	o__enterobacterales	c__gammaproteobacteria	p__proteobacteria	d__bacteria	TRUE	TRUE	4.4e-09	TRUE	1	GATCACCTCCTTACC	GAGCTTCTTAGGGGGTATCTTTGA	-9.48051
GCF_009183365.2	s__shewanella algae	g__shewanella	f__shewanellaceae	o__enterobacterales	c__gammaproteobacteria	p__proteobacteria	d__bacteria	TRUE	TRUE	5.3e-08	TRUE	1	GATCACCTCCTTACC	ATGCTCCTTAGGGGGTATCTTTGA	-9.48051
GCF_000015245.1	s__shewanella amazonensis	g__shewanella	f__shewanellaceae	o__enterobacterales	c__gammaproteobacteria	p__proteobacteria	d__bacteria	TRUE	TRUE	2.4e-07	TRUE	1	GATCACCTCCTTACC	ATGCTCCTTAGGGGGTATCTTTGA	-9.48051
GCF_002838165.1	s__shewanella sp002838165	g__shewanella	f__shewanellaceae	o__enterobacterales	c__gammaproteobacteria	p__proteobacteria	d__bacteria	TRUE	TRUE	4.5e-09	TRUE	1	GATCACCTCCTTACC	CAGCTTCTTAGGGGGTATCTTTGA	-9.48051
GCF_000262305.1	s__shimwellia blattae	g__shimwellia	f__enterobacteriaceae	o__enterobacterales	c__gammaproteobacteria	p__proteobacteria	d__bacteria	TRUE	TRUE	6.8e-10	TRUE	1	GATCACCTCCTTACC	GACGTTCTTAGGGGGTATCTTTGA	-9.48051
GCF_003073375.1	s__solibacillus sp003073375	g__solibacillus	f__planococcaceae	o__bacillales_a	c__bacilli	p__firmicutes	d__bacteria	TRUE	TRUE	7.7e-06	TRUE	1	GATCACCTCCTTTCT	GCGGACTTTAGGGGGTCTCTTTGA	-9.48051
GCF_002736105.1	s__solibacillus sp002736105	g__solibacillus	f__planococcaceae	o__bacillales_a	c__bacilli	p__firmicutes	d__bacteria	TRUE	TRUE	3.5e-06	TRUE	1	GATCACCTCCTTTCT	GCTGACTTTAGGGGGTCTCTTTGA	-9.48051
GCF_017498505.1	s__sporosarcina sp017498505	g__sporosarcina	f__planococcaceae	o__bacillales_a	c__bacilli	p__firmicutes	d__bacteria	TRUE	TRUE	3.5e-05	TRUE	1	GATCACCTCCTTTCT	GTGGACTTCAGGGGGTCTCTTTGA	-9.48051
GCF_003351785.1	s__sporosarcina sp003351785	g__sporosarcina	f__planococcaceae	o__bacillales_a	c__bacilli	p__firmicutes	d__bacteria	TRUE	TRUE	3.2e-06	TRUE	1	GATCACCTCCTTTCT	GCGGACTTTAGGGGGTCTCTTTGA	-9.48051
GCF_001590685.1	s__sporosarcina psychrophila	g__sporosarcina	f__planococcaceae	o__bacillales_a	c__bacilli	p__firmicutes	d__bacteria	TRUE	TRUE	1.1e-05	TRUE	1	GATCACCTCCTTTCT	GCGGACTTTAGGGGGTCTCTTTGA	-9.48051
GCF_002101375.1	s__sporosarcina ureae_b	g__sporosarcina	f__planococcaceae	o__bacillales_a	c__bacilli	p__firmicutes	d__bacteria	TRUE	TRUE	2.2e-05	TRUE	1	GATCACCTCCTTTCT	GCGGACTTTAGGGGGTCTCTTTGA	-9.48051
GCF_018309085.1	s__sporosarcina sp018309085	g__sporosarcina	f__planococcaceae	o__bacillales_a	c__bacilli	p__firmicutes	d__bacteria	TRUE	TRUE	1.9e-05	TRUE	1	GATCACCTCCTTTCT	GTGGACTTCAGGGGGTCTCTTTGA	-9.48051
GCF_002082015.1	s__sporosarcina ureae_a	g__sporosarcina	f__planococcaceae	o__bacillales_a	c__bacilli	p__firmicutes	d__bacteria	TRUE	TRUE	2.2e-05	TRUE	1	GATCACCTCCTTTCT	GCGGACTTTAGGGGGTCTCTTTGA	-9.48051
GCF_001753205.1	s__sporosarcina ureilytica	g__sporosarcina	f__planococcaceae	o__bacillales_a	c__bacilli	p__firmicutes	d__bacteria	TRUE	TRUE	0.00023	TRUE	1	GATCACCTCCTTTCT	GTGGACTTTAGGGGGTCTCTTTGA	-9.48051
GCF_002077155.1	s__sporosarcina sp002077155	g__sporosarcina	f__planococcaceae	o__bacillales_a	c__bacilli	p__firmicutes	d__bacteria	TRUE	TRUE	3.2e-06	TRUE	1	GATCACCTCCTTTCT	GCGGACTTTAGGGGGTCTCTTTGA	-9.48051
GCF_002109325.1	s__sporosarcina ureae_c	g__sporosarcina	f__planococcaceae	o__bacillales_a	c__bacilli	p__firmicutes	d__bacteria	TRUE	TRUE	2.1e-05	TRUE	1	GATCACCTCCTTTCT	GTGGACTTCAGGGGGTCTCTTTGA	-9.48051
GCF_000829195.1	s__sporosarcina sp000829195	g__sporosarcina	f__planococcaceae	o__bacillales_a	c__bacilli	p__firmicutes	d__bacteria	TRUE	TRUE	3.2e-06	TRUE	1	GATCACCTCCTTTCT	GCGGACTTCAGGGGGTCTCTTTGA	-9.48051
GCF_001618885.1	s__staphylococcus condimenti	g__staphylococcus	f__staphylococcaceae	o__staphylococcales	c__bacilli	p__firmicutes	d__bacteria	TRUE	TRUE	1.7e-07	TRUE	1	GATCACCTCCTTTCT	AATCAACTTAGGGGGTCTCTTTGA	-9.48051
GCF_003012915.1	s__staphylococcus felis	g__staphylococcus	f__staphylococcaceae	o__staphylococcales	c__bacilli	p__firmicutes	d__bacteria	TRUE	TRUE	6.7e-05	TRUE	1	GATCACCTCCTTTCT	GAACAACTTAGGGGGTCTCTTTGA	-9.48051
GCF_003491325.1	s__staphylococcus warneri_a	g__staphylococcus	f__staphylococcaceae	o__staphylococcales	c__bacilli	p__firmicutes	d__bacteria	TRUE	TRUE	1.6e-06	TRUE	1	GATCACCTCCTTTCT	AATCAAATTAGGGGGTCTCTTTGA	-9.48051
GCF_016774515.1	s__staphylococcus xylosus_a	g__staphylococcus	f__staphylococcaceae	o__staphylococcales	c__bacilli	p__firmicutes	d__bacteria	TRUE	TRUE	1.4e-08	TRUE	1	GATCACCTCCTTTCT	GAACAACTTAGGGGGTCTCTTTGA	-9.48051
GCF_001027105.1	s__staphylococcus aureus	g__staphylococcus	f__staphylococcaceae	o__staphylococcales	c__bacilli	p__firmicutes	d__bacteria	TRUE	TRUE	7.3e-07	TRUE	1	GATCACCTCCTTTCT	ACACAAATTAGGGGGTCTCTTTGA	-9.48051
GCF_000236925.1	s__staphylococcus argenteus	g__staphylococcus	f__staphylococcaceae	o__staphylococcales	c__bacilli	p__firmicutes	d__bacteria	TRUE	TRUE	7.3e-07	TRUE	1	GATCACCTCCTTTCT	ACGCAAATTAGGGGGTCTCTTTGA	-9.48051
GCF_003718735.1	s__staphylococcus debuckii	g__staphylococcus	f__staphylococcaceae	o__staphylococcales	c__bacilli	p__firmicutes	d__bacteria	TRUE	TRUE	1.7e-07	TRUE	1	GATCACCTCCTTTCT	AATCAACTTAGGGGGTCTCTTTGA	-9.48051
GCF_006094395.1	s__staphylococcus haemolyticus	g__staphylococcus	f__staphylococcaceae	o__staphylococcales	c__bacilli	p__firmicutes	d__bacteria	TRUE	TRUE	9.3e-08	TRUE	1	GATCACCTCCTTTCT	GCACAAATTAGGGGGTCTCTTTGA	-9.48051
GCF_002101335.1	s__staphylococcus lutrae	g__staphylococcus	f__staphylococcaceae	o__staphylococcales	c__bacilli	p__firmicutes	d__bacteria	TRUE	TRUE	2.2e-05	TRUE	1	GATCACCTCCTTTCT	GATCAAATTAGGGGGTCTCTTTGA	-9.48051
GCF_900636325.1	s__staphylococcus delphini	g__staphylococcus	f__staphylococcaceae	o__staphylococcales	c__bacilli	p__firmicutes	d__bacteria	TRUE	TRUE	1.7e-05	TRUE	1	GATCACCTCCTTTCT	GAACAACTTAGGGGGTCTCTTTGA	-9.48051
GCF_003019275.1	s__staphylococcus muscae	g__staphylococcus	f__staphylococcaceae	o__staphylococcales	c__bacilli	p__firmicutes	d__bacteria	TRUE	TRUE	4.9e-08	TRUE	1	GATCACCTCCTTTCT	GAACAACTTAGGGGGTCTCTTTGA	-9.48051
GCF_000816085.1	s__staphylococcus hyicus	g__staphylococcus	f__staphylococcaceae	o__staphylococcales	c__bacilli	p__firmicutes	d__bacteria	TRUE	TRUE	4.3e-06	TRUE	1	GATCACCTCCTTTCT	GATCAACTCAGGGGGTCTCTTTGA	-9.48051
GCF_900636385.1	s__staphylococcus warneri	g__staphylococcus	f__staphylococcaceae	o__staphylococcales	c__bacilli	p__firmicutes	d__bacteria	TRUE	TRUE	1.6e-06	TRUE	1	GATCACCTCCTTTCT	AATCAAATTAGGGGGTCTCTTTGA	-9.48051
GCF_000010125.1	s__staphylococcus saprophyticus	g__staphylococcus	f__staphylococcaceae	o__staphylococcales	c__bacilli	p__firmicutes	d__bacteria	TRUE	TRUE	5e-08	TRUE	1	GATCACCTCCTTTCT	GAACAACTTAGGGGGTCTCTTTGA	-9.48051
GCF_013463155.1	s__staphylococcus sp013463155	g__staphylococcus	f__staphylococcaceae	o__staphylococcales	c__bacilli	p__firmicutes	d__bacteria	TRUE	TRUE	4.5e-06	TRUE	1	GATCACCTCCTTTCT	GAACAACTTAGGGGGTCTCTTTGA	-9.48051
GCA_900186985.1	s__staphylococcus piscifermentans	g__staphylococcus	f__staphylococcaceae	o__staphylococcales	c__bacilli	p__firmicutes	d__bacteria	TRUE	TRUE	1.7e-07	TRUE	1	GATCACCTCCTTTCT	AATCAACTTAGGGGGTCTCTTTGA	-9.48051
GCF_006742205.1	s__staphylococcus epidermidis	g__staphylococcus	f__staphylococcaceae	o__staphylococcales	c__bacilli	p__firmicutes	d__bacteria	TRUE	TRUE	1.3e-07	TRUE	1	GATCACCTCCTTTCT	AATCAAATTAGGGGGTCTCTTTGA	-9.48051
GCF_015775975.1	s__staphylococcus lloydii	g__staphylococcus	f__staphylococcaceae	o__staphylococcales	c__bacilli	p__firmicutes	d__bacteria	TRUE	TRUE	6.9e-07	TRUE	1	GATCACCTCCTTTCT	GAACAACTTAGGGGGTCTCTTTGA	-9.48051
GCA_900458895.2	s__staphylococcus schleiferi	g__staphylococcus	f__staphylococcaceae	o__staphylococcales	c__bacilli	p__firmicutes	d__bacteria	TRUE	TRUE	3.5e-08	TRUE	1	GATCACCTCCTTTCT	GAACAACTTAGGGGGTCTCTTTGA	-9.48051
GCF_010365305.1	s__staphylococcus sp010365305	g__staphylococcus	f__staphylococcaceae	o__staphylococcales	c__bacilli	p__firmicutes	d__bacteria	TRUE	TRUE	1.7e-05	TRUE	1	GATCACCTCCTTTCT	GAACAACTTAGGGGGTCTCTTTGA	-9.48051
GCF_003019255.1	s__staphylococcus kloosii	g__staphylococcus	f__staphylococcaceae	o__staphylococcales	c__bacilli	p__firmicutes	d__bacteria	TRUE	TRUE	8.6e-07	TRUE	1	GATCACCTCCTTTCT	GACCAACTTAGGGGGTCTCTTTGA	-9.48051
GCF_017357005.1	s__staphylococcus simiae_a	g__staphylococcus	f__staphylococcaceae	o__staphylococcales	c__bacilli	p__firmicutes	d__bacteria	TRUE	TRUE	7.3e-07	TRUE	1	GATCACCTCCTTTCT	ACACAAATTAGGGGGTCTCTTTGA	-9.48051
GCF_003856495.1	s__staphylospora marina	g__staphylospora	f__thermoactinomycetaceae	o__thermoactinomycetales	c__bacilli	p__firmicutes	d__bacteria	TRUE	TRUE	4.6e-07	TRUE	1	GATCACCTCCTTTCT	GCGGACATCAGGGGGTCTCTTTGA	-9.48051
GCF_001700965.1	s__stenotrophomonas nitritireducens_a	g__stenotrophomonas	f__xanthomonadaceae	o__xanthomonadales	c__gammaproteobacteria	p__proteobacteria	d__bacteria	TRUE	TRUE	2.3e-08	TRUE	1	GATCACCTCCTTTTG	GTATCGCTCAGGGGGTATCTTTGA	-9.48051
GCF_009832905.1	s__stenotrophomonas maltophilia_ap	g__stenotrophomonas	f__xanthomonadaceae	o__xanthomonadales	c__gammaproteobacteria	p__proteobacteria	d__bacteria	TRUE	TRUE	3.5e-08	TRUE	1	GATCACCTCCTTTTG	CTGTCGCTCAGGGGGTATCTTTGA	-9.48051
GCF_001704155.1	s__stenotrophomonas rhizophila_a	g__stenotrophomonas	f__xanthomonadaceae	o__xanthomonadales	c__gammaproteobacteria	p__proteobacteria	d__bacteria	TRUE	TRUE	3.5e-08	TRUE	1	GATCACCTCCTTTTG	CTCTCGCTCAGGGGGTATCTTTGA	-9.48051
GCF_011604605.1	s__stenotrophomonas maltophilia_ao	g__stenotrophomonas	f__xanthomonadaceae	o__xanthomonadales	c__gammaproteobacteria	p__proteobacteria	d__bacteria	TRUE	TRUE	3.5e-08	TRUE	1	GATCACCTCCTTTTG	CTCTCGCTCAGGGGGTATCTTTGA	-9.48051
GCF_002951995.1	s__stenotrophomonas acidaminiphila_a	g__stenotrophomonas	f__xanthomonadaceae	o__xanthomonadales	c__gammaproteobacteria	p__proteobacteria	d__bacteria	TRUE	TRUE	1.6e-08	TRUE	1	GATCACCTCCTTTTG	GTCTCGCTCAGGGGGTATCTTTGA	-9.48051
GCF_014621775.1	s__stenotrophomonas sp014621775	g__stenotrophomonas	f__xanthomonadaceae	o__xanthomonadales	c__gammaproteobacteria	p__proteobacteria	d__bacteria	TRUE	TRUE	3.5e-08	TRUE	1	GATCACCTCCTTTTG	CTGTCGCTCAGGGGGTATCTTTGA	-9.48051
GCF_001579945.1	s__steroidobacter denitrificans	g__steroidobacter	f__steroidobacteraceae	o__steroidobacterales	c__gammaproteobacteria	p__proteobacteria	d__bacteria	TRUE	TRUE	1.7e-06	TRUE	1	GATCACCTCCTTTAA	GAGGCGCTCAGGGGGTTTCTTTGA	-9.48051
GCF_002386345.1	s__streptococcus oralis_s	g__streptococcus	f__streptococcaceae	o__lactobacillales	c__bacilli	p__firmicutes	d__bacteria	TRUE	TRUE	2.4e-08	TRUE	1	GATCACCTCCTTTCT	GCTTCTTTCAGGGGGTCTCTTTGA	-9.48051
GCF_003595525.1	s__streptococcus respiraculi	g__streptococcus	f__streptococcaceae	o__lactobacillales	c__bacilli	p__firmicutes	d__bacteria	TRUE	TRUE	6.2e-09	TRUE	1	GATCACCTCCTTTCT	AACTCATTCAGGGGGTCTCTTTGA	-9.48051
GCF_000164675.2	s__streptococcus parasanguinis	g__streptococcus	f__streptococcaceae	o__lactobacillales	c__bacilli	p__firmicutes	d__bacteria	TRUE	TRUE	2.4e-08	TRUE	1	GATCACCTCCTTTCT	GCTTCTTTCAGGGGGTCTCTTTGA	-9.48051
GCF_000027165.1	s__streptococcus mitis_ar	g__streptococcus	f__streptococcaceae	o__lactobacillales	c__bacilli	p__firmicutes	d__bacteria	TRUE	TRUE	2.4e-08	TRUE	1	GATCACCTCCTTTCT	GCTTCTTTCAGGGGGTCTCTTTGA	-9.48051
GCF_003627135.1	s__streptococcus koreensis	g__streptococcus	f__streptococcaceae	o__lactobacillales	c__bacilli	p__firmicutes	d__bacteria	TRUE	TRUE	2.4e-08	TRUE	1	GATCACCTCCTTTCT	GCTTCTTTCAGGGGGTCTCTTTGA	-9.48051
GCF_000253155.1	s__streptococcus oralis_l	g__streptococcus	f__streptococcaceae	o__lactobacillales	c__bacilli	p__firmicutes	d__bacteria	TRUE	TRUE	2.4e-08	TRUE	1	GATCACCTCCTTTCT	GCTTCTTTTAGGGGGTCTCTTTGA	-9.48051
GCF_000385925.1	s__streptococcus cristatus_b	g__streptococcus	f__streptococcaceae	o__lactobacillales	c__bacilli	p__firmicutes	d__bacteria	TRUE	TRUE	2.4e-08	TRUE	1	GATCACCTCCTTTCT	GCTTCTTTCAGGGGGTCTCTTTGA	-9.48051
GCF_001457635.1	s__streptococcus pneumoniae	g__streptococcus	f__streptococcaceae	o__lactobacillales	c__bacilli	p__firmicutes	d__bacteria	TRUE	TRUE	8.1e-07	TRUE	1	GATCACCTCCTTTCT	GCTTCTTTCAGGGGGTCTCTTTGA	-9.48051
GCF_001697145.1	s__streptococcus anginosus_c	g__streptococcus	f__streptococcaceae	o__lactobacillales	c__bacilli	p__firmicutes	d__bacteria	TRUE	TRUE	2.4e-08	TRUE	1	GATCACCTCCTTTCT	GCTTCTTTCAGGGGGTCTCTTTGA	-9.48051
GCF_900636475.1	s__streptococcus anginosus	g__streptococcus	f__streptococcaceae	o__lactobacillales	c__bacilli	p__firmicutes	d__bacteria	TRUE	TRUE	2.4e-08	TRUE	1	GATCACCTCCTTTCT	GCTTCTTTCAGGGGGTCTCTTTGA	-9.48051
GCF_009731465.1	s__streptococcus pseudopneumoniae_e	g__streptococcus	f__streptococcaceae	o__lactobacillales	c__bacilli	p__firmicutes	d__bacteria	TRUE	TRUE	2e-08	TRUE	1	GATCACCTCCTTTCT	GCTTCTTTTAGGGGGTCTCTTTGA	-9.48051
GCF_000294495.1	s__streptococcus suis	g__streptococcus	f__streptococcaceae	o__lactobacillales	c__bacilli	p__firmicutes	d__bacteria	TRUE	TRUE	8e-08	TRUE	1	GATCACCTCCTTTCT	ACTTCTTTTAGGGGGTCTCTTTGA	-9.48051
GCF_001560895.1	s__streptococcus mitis_q	g__streptococcus	f__streptococcaceae	o__lactobacillales	c__bacilli	p__firmicutes	d__bacteria	TRUE	TRUE	8.1e-07	TRUE	1	GATCACCTCCTTTCT	GCTTCTTTCAGGGGGTCTCTTTGA	-9.48051
GCF_900635155.1	s__streptococcus sanguinis_g	g__streptococcus	f__streptococcaceae	o__lactobacillales	c__bacilli	p__firmicutes	d__bacteria	TRUE	TRUE	2.4e-08	TRUE	1	GATCACCTCCTTTCT	GCTTCTTTCAGGGGGTCTCTTTGA	-9.48051
GCF_902702775.1	s__streptococcus suis_w	g__streptococcus	f__streptococcaceae	o__lactobacillales	c__bacilli	p__firmicutes	d__bacteria	TRUE	TRUE	8e-08	TRUE	1	GATCACCTCCTTTCT	ACTTCCTTTAGGGGGTCTCTTTGA	-9.48051
GCF_001553685.1	s__streptococcus sp001553685	g__streptococcus	f__streptococcaceae	o__lactobacillales	c__bacilli	p__firmicutes	d__bacteria	TRUE	TRUE	2.4e-08	TRUE	1	GATCACCTCCTTTCT	GCTTCTTTTAGGGGGTCTCTTTGA	-9.48051
GCF_007475365.1	s__streptococcus mitis_ax	g__streptococcus	f__streptococcaceae	o__lactobacillales	c__bacilli	p__firmicutes	d__bacteria	TRUE	TRUE	2.4e-08	TRUE	1	GATCACCTCCTTTCT	GCTTCTTTCAGGGGGTCTCTTTGA	-9.48051
GCF_013394695.1	s__streptococcus sp013394695	g__streptococcus	f__streptococcaceae	o__lactobacillales	c__bacilli	p__firmicutes	d__bacteria	TRUE	TRUE	2.4e-08	TRUE	1	GATCACCTCCTTTCT	GCTTCTTTCAGGGGGTCTCTTTGA	-9.48051
GCF_013305725.1	s__streptococcus mitis_bo	g__streptococcus	f__streptococcaceae	o__lactobacillales	c__bacilli	p__firmicutes	d__bacteria	TRUE	TRUE	2.4e-08	TRUE	1	GATCACCTCCTTTCT	GCTTCTTTCAGGGGGTCTCTTTGA	-9.48051
GCF_013343115.1	s__streptococcus sanguinis_h	g__streptococcus	f__streptococcaceae	o__lactobacillales	c__bacilli	p__firmicutes	d__bacteria	TRUE	TRUE	2.4e-08	TRUE	1	GATCACCTCCTTTCT	GCTTCTTTCAGGGGGTCTCTTTGA	-9.48051
GCF_002355895.1	s__streptococcus sp002355895	g__streptococcus	f__streptococcaceae	o__lactobacillales	c__bacilli	p__firmicutes	d__bacteria	TRUE	TRUE	2.4e-08	TRUE	1	GATCACCTCCTTTCT	GCTTCTTTCAGGGGGTCTCTTTGA	-9.48051
GCF_003627155.1	s__streptococcus gwangjuense	g__streptococcus	f__streptococcaceae	o__lactobacillales	c__bacilli	p__firmicutes	d__bacteria	TRUE	TRUE	2.4e-08	TRUE	1	GATCACCTCCTTTCT	GCTTCTTTCAGGGGGTCTCTTTGA	-9.48051
GCF_001708305.1	s__streptococcus himalayensis	g__streptococcus	f__streptococcaceae	o__lactobacillales	c__bacilli	p__firmicutes	d__bacteria	TRUE	TRUE	3.1e-08	TRUE	1	GATCACCTCCTTTCT	AACTCTTTCAGGGGGTCTCTTTGA	-9.48051
GCF_001983955.1	s__streptococcus oralis_h	g__streptococcus	f__streptococcaceae	o__lactobacillales	c__bacilli	p__firmicutes	d__bacteria	TRUE	TRUE	2.4e-08	TRUE	1	GATCACCTCCTTTCT	GCTTCTTTTAGGGGGTCTCTTTGA	-9.48051
GCF_900637025.1	s__streptococcus oralis	g__streptococcus	f__streptococcaceae	o__lactobacillales	c__bacilli	p__firmicutes	d__bacteria	TRUE	TRUE	2.4e-08	TRUE	1	GATCACCTCCTTTCT	GCTTCTTTTAGGGGGTCTCTTTGA	-9.48051
GCF_001281025.1	s__streptococcus mitis_ak	g__streptococcus	f__streptococcaceae	o__lactobacillales	c__bacilli	p__firmicutes	d__bacteria	TRUE	TRUE	8.1e-07	TRUE	1	GATCACCTCCTTTCT	GCTTCTTTCAGGGGGTCTCTTTGA	-9.48051
GCF_001623565.1	s__streptococcus marmotae	g__streptococcus	f__streptococcaceae	o__lactobacillales	c__bacilli	p__firmicutes	d__bacteria	TRUE	TRUE	3.8e-09	TRUE	1	GATCACCTCCTTTCT	AACTCATTCAGGGGGTCTCTTTGA	-9.48051
GCF_016658865.1	s__streptococcus mitis_bt	g__streptococcus	f__streptococcaceae	o__lactobacillales	c__bacilli	p__firmicutes	d__bacteria	TRUE	TRUE	2.4e-08	TRUE	1	GATCACCTCCTTTCT	GCTTCTTTCAGGGGGTCTCTTTGA	-9.48051
GCF_016028255.1	s__streptococcus oralis_ac	g__streptococcus	f__streptococcaceae	o__lactobacillales	c__bacilli	p__firmicutes	d__bacteria	TRUE	TRUE	2.4e-08	TRUE	1	GATCACCTCCTTTCT	GCTTCTTTTAGGGGGTCTCTTTGA	-9.48051
GCF_016127915.1	s__streptococcus oralis_bo	g__streptococcus	f__streptococcaceae	o__lactobacillales	c__bacilli	p__firmicutes	d__bacteria	TRUE	TRUE	2.4e-08	TRUE	1	GATCACCTCCTTTCT	GCTTCTTTTAGGGGGTCTCTTTGA	-9.48051
GCF_017639855.1	s__streptococcus sp013623465	g__streptococcus	f__streptococcaceae	o__lactobacillales	c__bacilli	p__firmicutes	d__bacteria	TRUE	TRUE	3.8e-09	TRUE	1	GATCACCTCCTTTCT	AACTCATTCAGGGGGTCTCTTTGA	-9.48051
GCF_002356415.1	s__streptococcus oralis_f	g__streptococcus	f__streptococcaceae	o__lactobacillales	c__bacilli	p__firmicutes	d__bacteria	TRUE	TRUE	2.4e-08	TRUE	1	GATCACCTCCTTTCT	GCTTCTTTCAGGGGGTCTCTTTGA	-9.48051
GCF_000148585.2	s__streptococcus mitis	g__streptococcus	f__streptococcaceae	o__lactobacillales	c__bacilli	p__firmicutes	d__bacteria	TRUE	TRUE	2.4e-08	TRUE	1	GATCACCTCCTTTCT	GCTTCTTTCAGGGGGTCTCTTTGA	-9.48051
GCF_901543175.1	s__streptococcus australis_a	g__streptococcus	f__streptococcaceae	o__lactobacillales	c__bacilli	p__firmicutes	d__bacteria	TRUE	TRUE	2.4e-08	TRUE	1	GATCACCTCCTTTCT	GCTTCTTTCAGGGGGTCTCTTTGA	-9.48051
GCF_003609975.1	s__streptococcus ruminantium	g__streptococcus	f__streptococcaceae	o__lactobacillales	c__bacilli	p__firmicutes	d__bacteria	TRUE	TRUE	1e-07	TRUE	1	GATCACCTCCTTTCT	ACTTCTTTTAGGGGGTCTCTTTGA	-9.48051
GCF_003967195.1	s__sulfuriflexus mobilis	g__sulfuriflexus		o__aks1	c__gammaproteobacteria	p__proteobacteria	d__bacteria	TRUE	TRUE	2.2e-07	TRUE	1	GATCACCTCCTTTAA	GACGAGCTTAGGGGGTATCTTTGA	-9.48051
GCF_009363695.1	s__sutcliffiella_a sp009363695	g__sutcliffiella_a	f__bacillaceae_i	o__bacillales	c__bacilli	p__firmicutes	d__bacteria	TRUE	TRUE	2.9e-06	TRUE	1	GATCACCTCCTTTCT	GTTGAATTTAGGGGGTCCCTTTGA	-9.48051
GCF_002157855.1	s__sutcliffiella_a horikoshii_c	g__sutcliffiella_a	f__bacillaceae_i	o__bacillales	c__bacilli	p__firmicutes	d__bacteria	TRUE	TRUE	2.9e-06	TRUE	1	GATCACCTCCTTTCT	GTCGAGTTTAGGGGGTCTCTTTGA	-9.48051
GCF_002240035.1	s__tatlockia clemsonensis	g__tatlockia	f__legionellaceae	o__legionellales	c__gammaproteobacteria	p__proteobacteria	d__bacteria	TRUE	TRUE	1.4e-07	TRUE	1	GATCACCTCCTTAAT	ACAGCGCTTAGGGGGTATCTTTGA	-9.48051
GCF_900187355.1	s__tatlockia lansingensis	g__tatlockia	f__legionellaceae	o__legionellales	c__gammaproteobacteria	p__proteobacteria	d__bacteria	TRUE	TRUE	1.1e-07	TRUE	1	GATCACCTCCTTAAT	GCAGCGCTTAGGGGGTATCTTTGA	-9.48051
GCF_900637635.1	s__tatlockia jordanis	g__tatlockia	f__legionellaceae	o__legionellales	c__gammaproteobacteria	p__proteobacteria	d__bacteria	TRUE	TRUE	2.2e-07	TRUE	1	GATCACCTCCTTAAT	ACAGCGCTTAGGGGGTATCTTTGA	-9.48051
GCF_002163585.1	s__tatumella citrea	g__tatumella	f__enterobacteriaceae	o__enterobacterales	c__gammaproteobacteria	p__proteobacteria	d__bacteria	TRUE	TRUE	1.1e-09	TRUE	1	GATCACCTCCTTACC	AATGTGCTTAGGGGGTATCTTTGA	-9.48051
GCF_000276685.1	s__taylorella equigenitalis	g__taylorella	f__burkholderiaceae	o__burkholderiales	c__gammaproteobacteria	p__proteobacteria	d__bacteria	TRUE	TRUE	3.3e-06	TRUE	1	GATCACCTCCTTTAA	GAATCCCTCAGGGGGTATCTTTGA	-9.48051
GCF_014217335.1	s__teredinibacter purpureus	g__teredinibacter	f__cellvibrionaceae	o__pseudomonadales	c__gammaproteobacteria	p__proteobacteria	d__bacteria	TRUE	TRUE	2.1e-07	TRUE	1	GATCACCTCCTTAAC	GACGTGCTTAGGGGGTATCTTTGA	-9.48051
GCF_000023025.1	s__teredinibacter turnerae_b	g__teredinibacter	f__cellvibrionaceae	o__pseudomonadales	c__gammaproteobacteria	p__proteobacteria	d__bacteria	TRUE	TRUE	4.2e-08	TRUE	1	GATCACCTCCTTAAC	GACGTGCTTAGGGGGTATCTTTGA	-9.48051
GCF_014211975.1	s__teredinibacter haidensis	g__teredinibacter	f__cellvibrionaceae	o__pseudomonadales	c__gammaproteobacteria	p__proteobacteria	d__bacteria	TRUE	TRUE	6.2e-09	TRUE	1	GATCACCTCCTTAAC	GATGTGCTTAGGGGGTATCTTTGA	-9.48051
GCF_019056395.1	s__terribacillus aidingensis_a	g__terribacillus	f__amphibacillaceae	o__bacillales_d	c__bacilli	p__firmicutes	d__bacteria	TRUE	TRUE	1.7e-07	TRUE	1	GATCACCTCCTTTCT	ACAGACTTTAGGGGGTCTCTTTGA	-9.48051
GCF_003795145.1	s__tetragenococcus koreensis	g__tetragenococcus	f__enterococcaceae	o__lactobacillales	c__bacilli	p__firmicutes	d__bacteria	TRUE	TRUE	2e-08	TRUE	1	GATCACCTCCTTTCT	GCAAGTTTTAGGGGGTCTCTTTGA	-9.48051
GCF_000355675.1	s__thalassolituus oleivorans	g__thalassolituus	f__dsm-6294	o__pseudomonadales	c__gammaproteobacteria	p__proteobacteria	d__bacteria	TRUE	TRUE	6.5e-09	TRUE	1	GATCACCTCCTTAAA	GACGTGCTTAGGGGGTATCTTTGA	-9.48051
GCF_014898095.1	s__thalassotalea sp014898095	g__thalassotalea	f__alteromonadaceae	o__enterobacterales	c__gammaproteobacteria	p__proteobacteria	d__bacteria	TRUE	TRUE	1.7e-08	TRUE	1	GATCACCTCCTTATC	CAGATGCTTAGGGGGTACCTTTGA	-9.48051
GCF_009664085.1	s__thermochromatium tepidum	g__thermochromatium	f__chromatiaceae	o__chromatiales	c__gammaproteobacteria	p__proteobacteria	d__bacteria	TRUE	TRUE	1.7e-07	TRUE	1	GATCACCTCCTTAAG	GAGTCCCTCAGGGGGTATCTTTGA	-9.48051
GCF_000091545.1	s__thermus thermophilus	g__thermus	f__thermaceae	o__deinococcales	c__deinococci	p__deinococcota	d__bacteria	TRUE	TRUE	0.012	TRUE	1	GATCACCTCCTTTCT	GAAGGCCTCAGGGGGTATCTTTGA	-9.48051
GCF_000236585.1	s__thermus sp000236585	g__thermus	f__thermaceae	o__deinococcales	c__deinococci	p__deinococcota	d__bacteria	TRUE	TRUE	0.023	TRUE	1	GATCACCTCCTTTCT	GACAGCCTCAGGGGGTATCTTTGA	-9.48051
GCF_000025545.1	s__thioalkalivibrio sp000025545	g__thioalkalivibrio	f__thioalkalivibrionaceae	o__ectothiorhodospirales	c__gammaproteobacteria	p__proteobacteria	d__bacteria	TRUE	TRUE	4.3e-08	TRUE	1	GATCACCTCCTTTAA	GAAGGCCTTAGGGGGTATCTTTGA	-9.48051
GCF_000227685.2	s__thioalkalivibrio_b paradoxus	g__thioalkalivibrio_b	f__thioalkalivibrionaceae	o__ectothiorhodospirales	c__gammaproteobacteria	p__proteobacteria	d__bacteria	TRUE	TRUE	2e-07	TRUE	1	GATCACCTCCTTTAA	GAAGGCCTTAGGGGGTATCTTTGA	-9.48051
GCF_000321415.2	s__thioalkalivibrio_b nitratireducens	g__thioalkalivibrio_b	f__thioalkalivibrionaceae	o__ectothiorhodospirales	c__gammaproteobacteria	p__proteobacteria	d__bacteria	TRUE	TRUE	2e-07	TRUE	1	GATCACCTCCTTTAA	GAAGGCCTTAGGGGGTATCTTTGA	-9.48051
GCF_000012745.1	s__thiobacillus denitrificans_b	g__thiobacillus	f__thiobacillaceae	o__burkholderiales	c__gammaproteobacteria	p__proteobacteria	d__bacteria	TRUE	TRUE	8e-07	TRUE	1	GATCACCTCCTTTCT	ACCCAGCTCAGGGGGTTTCTTTGA	-9.48051
GCF_002813775.1	s__thiodictyon syntrophicum	g__thiodictyon	f__chromatiaceae	o__chromatiales	c__gammaproteobacteria	p__proteobacteria	d__bacteria	TRUE	TRUE	5.2e-07	TRUE	1	GATCACCTCCTTACA	GCGTCCCTTAGGGGGTATCTTTGA	-9.48051
GCF_000327045.1	s__thioflavicoccus mobilis	g__thioflavicoccus	f__chromatiaceae	o__chromatiales	c__gammaproteobacteria	p__proteobacteria	d__bacteria	TRUE	TRUE	7.4e-08	TRUE	1	GATCACCTCCTTAAA	GCGTCCCTTAGGGGGTATCTTTGA	-9.48051
GCF_000828615.1	s__thiolapillus brandeum	g__thiolapillus	f__sedimenticolaceae	o__chromatiales	c__gammaproteobacteria	p__proteobacteria	d__bacteria	TRUE	TRUE	5.2e-09	TRUE	1	GATCACCTCCTTAAT	GAATCCCTCAGGGGGTATCTTTGA	-9.48051
GCF_004293625.1	s__thiomicrorhabdus indica	g__thiomicrorhabdus	f__thiomicrospiraceae	o__thiomicrospirales	c__gammaproteobacteria	p__proteobacteria	d__bacteria	TRUE	TRUE	1.9e-09	TRUE	1	GATCACCTCCTTTAA	CAAGTGCTTAGGGGGTATCTTTGA	-9.48051
GCF_004001325.1	s__thiomicrorhabdus aquaedulcis	g__thiomicrorhabdus	f__thiomicrospiraceae	o__thiomicrospirales	c__gammaproteobacteria	p__proteobacteria	d__bacteria	TRUE	TRUE	8e-07	TRUE	1	GATCACCTCCTTTAA	GACATCCTTAGGGGGTATCTTTGA	-9.48051
GCF_011398355.1	s__thiomicrorhabdus sp011398355	g__thiomicrorhabdus	f__thiomicrospiraceae	o__thiomicrospirales	c__gammaproteobacteria	p__proteobacteria	d__bacteria	TRUE	TRUE	1.4e-07	TRUE	1	GATCACCTCCTTTAA	TCTGTGCTTAGGGGGTATCTTTGA	-9.48051
GCF_013282625.1	s__thiomicrorhabdus xiamenensis	g__thiomicrorhabdus	f__thiomicrospiraceae	o__thiomicrospirales	c__gammaproteobacteria	p__proteobacteria	d__bacteria	TRUE	TRUE	6.8e-09	TRUE	1	GATCACCTCCTTTAA	TCTGTGCTTAGGGGGTATCTTTGA	-9.48051
GCF_005885815.1	s__thiomicrorhabdus sediminis	g__thiomicrorhabdus	f__thiomicrospiraceae	o__thiomicrospirales	c__gammaproteobacteria	p__proteobacteria	d__bacteria	TRUE	TRUE	3e-08	TRUE	1	GATCACCTCCTTTAA	GATGTGCTTAGGGGGTATCTTTGA	-9.48051
GCF_000214825.1	s__thiomicrospira cyclica	g__thiomicrospira	f__thiomicrospiraceae	o__thiomicrospirales	c__gammaproteobacteria	p__proteobacteria	d__bacteria	TRUE	TRUE	2e-07	TRUE	1	GATCACCTCCTTTAA	CAAGTGCTTAGGGGGTATCTTTGA	-9.48051
GCF_000227665.2	s__thiomicrospira aerophila	g__thiomicrospira	f__thiomicrospiraceae	o__thiomicrospirales	c__gammaproteobacteria	p__proteobacteria	d__bacteria	TRUE	TRUE	4.9e-08	TRUE	1	GATCACCTCCTTTAA	CTCGTGCTTAGGGGGTATCTTTGA	-9.48051
GCF_011398155.1	s__thiosulfativibrio zosterae	g__thiosulfativibrio	f__thiomicrospiraceae	o__thiomicrospirales	c__gammaproteobacteria	p__proteobacteria	d__bacteria	TRUE	TRUE	1.3e-08	TRUE	1	GATCACCTCCTTTAA	GTGACGATTAGGGGGTATCTTTGA	-9.48051
GCF_000092425.1	s__truepera radiovictrix	g__truepera	f__trueperaceae	o__deinococcales	c__deinococci	p__deinococcota	d__bacteria	TRUE	TRUE	0.0041	TRUE	1	GATCACCTCCTTTCT	CACGCCCTCAGGGGGTATCTTTGA	-9.48051
GCF_017348915.1	s__uba7405 sp000755535	g__uba7405	f__enterobacteriaceae	o__enterobacterales	c__gammaproteobacteria	p__proteobacteria	d__bacteria	TRUE	TRUE	6.8e-10	TRUE	1	GATCACCTCCTTACC	GACGTTCTTAGGGGGTATCTTTGA	-9.48051
GCF_005491425.1	s__ureibacillus sp005491425	g__ureibacillus	f__planococcaceae	o__bacillales_a	c__bacilli	p__firmicutes	d__bacteria	TRUE	TRUE	2.6e-06	TRUE	1	GATCACCTCCTTTCT	GCGGATTTCAGGGGGTCTCTTTGA	-9.48051
GCF_011304195.1	s__vagococcus hydrophili	g__vagococcus	f__vagococcaceae	o__lactobacillales	c__bacilli	p__firmicutes	d__bacteria	TRUE	TRUE	9.3e-09	TRUE	1	GATCACCTCCTTTCT	AATAACTTTAGGGGGTCTCTTTGA	-9.48051
GCF_001870205.1	s__vagococcus teuberi	g__vagococcus	f__vagococcaceae	o__lactobacillales	c__bacilli	p__firmicutes	d__bacteria	TRUE	TRUE	4e-07	TRUE	1	GATCACCTCCTTTCT	ACTAATTTTAGGGGGTCTCTTTGA	-9.48051
GCF_001998885.1	s__vagococcus penaei	g__vagococcus	f__vagococcaceae	o__lactobacillales	c__bacilli	p__firmicutes	d__bacteria	TRUE	TRUE	1.5e-05	TRUE	1	GATCACCTCCTTTCT	ATTAACTTCAGGGGGTCTCTTTGA	-9.48051
GCF_014397115.1	s__vagococcus carniphilus	g__vagococcus	f__vagococcaceae	o__lactobacillales	c__bacilli	p__firmicutes	d__bacteria	TRUE	TRUE	7e-07	TRUE	1	GATCACCTCCTTTCT	GAAAATTTTAGGGGGTCACTTTGA	-9.48051
GCF_004792515.1	s__vagococcus_a sp004792515	g__vagococcus_a	f__vagococcaceae	o__lactobacillales	c__bacilli	p__firmicutes	d__bacteria	TRUE	TRUE	2.1e-05	TRUE	1	GATCACCTCCTTTCT	GCCGATTTTAGGGGGTCTCTTTGA	-9.48051
GCF_005145005.1	s__vagococcus_a zengguangii	g__vagococcus_a	f__vagococcaceae	o__lactobacillales	c__bacilli	p__firmicutes	d__bacteria	TRUE	TRUE	3.2e-05	TRUE	1	GATCACCTCCTTTCT	GATGATTTTAGGGGGTCTCTTTGA	-9.48051
GCF_011303955.1	s__vagococcus_d coleopterorum	g__vagococcus_d	f__vagococcaceae	o__lactobacillales	c__bacilli	p__firmicutes	d__bacteria	TRUE	TRUE	1.1e-06	TRUE	1	GATCACCTCCTTTCT	ATTGAATTTAGGGGGTCACTTTGA	-9.48051
GCF_000725285.1	s__virgibacillus sp000725285	g__virgibacillus	f__amphibacillaceae	o__bacillales_d	c__bacilli	p__firmicutes	d__bacteria	TRUE	TRUE	1.1e-07	TRUE	1	GATCACCTCCTTTCT	GAAGACTTTAGGGGGTCTCTTTGA	-9.48051
GCF_018075365.1	s__virgibacillus pantothenticus	g__virgibacillus	f__amphibacillaceae	o__bacillales_d	c__bacilli	p__firmicutes	d__bacteria	TRUE	TRUE	5.5e-08	TRUE	1	GATCACCTCCTTTCT	AATGACTTTAGGGGGTCTCTTTGA	-9.48051
GCF_002216775.1	s__virgibacillus_f phasianinus	g__virgibacillus_f	f__amphibacillaceae	o__bacillales_d	c__bacilli	p__firmicutes	d__bacteria	TRUE	TRUE	5.7e-08	TRUE	1	GATCACCTCCTTTCT	GAAGACTTTAGGGGGTCTCTTTGA	-9.48051
GCF_002224365.1	s__virgibacillus_f necropolis	g__virgibacillus_f	f__amphibacillaceae	o__bacillales_d	c__bacilli	p__firmicutes	d__bacteria	TRUE	TRUE	8.9e-09	TRUE	1	GATCACCTCCTTTCT	GAAGACTTTAGGGGGTCCCTTTGA	-9.48051
GCF_000169195.2	s__weizmannia coagulans_a	g__weizmannia	f__bacillaceae_c	o__bacillales_b	c__bacilli	p__firmicutes	d__bacteria	TRUE	TRUE	1.8e-06	TRUE	1	GATCACCTCCTTTCT	GCGGGTTTCAGGGGGTCTCTTTGA	-9.48051
GCF_001187785.1	s__wenzhouxiangella marina	g__wenzhouxiangella	f__wenzhouxiangellaceae	o__xanthomonadales	c__gammaproteobacteria	p__proteobacteria	d__bacteria	TRUE	TRUE	5.1e-05	TRUE	1	GATCACCTCCTTTAA	GCTGCGCTTAGGGGGTATCTTTGA	-9.48051
GCF_003999565.1	s__xanthomonas phaseoli	g__xanthomonas	f__xanthomonadaceae	o__xanthomonadales	c__gammaproteobacteria	p__proteobacteria	d__bacteria	TRUE	TRUE	2.9e-08	TRUE	1	GATCACCTCCTTTTG	CTCTCGCTCAGGGGGTATCTTTGA	-9.48051
GCF_017603965.1	s__xanthomonas fragariae_a	g__xanthomonas	f__xanthomonadaceae	o__xanthomonadales	c__gammaproteobacteria	p__proteobacteria	d__bacteria	TRUE	TRUE	3e-08	TRUE	1	GATCACCTCCTTTTG	CTCTCGCTCAGGGGGTATCTTTGA	-9.48051
GCF_000007145.1	s__xanthomonas campestris	g__xanthomonas	f__xanthomonadaceae	o__xanthomonadales	c__gammaproteobacteria	p__proteobacteria	d__bacteria	TRUE	TRUE	2.9e-08	TRUE	1	GATCACCTCCTTTTG	CTCTCGCTCAGGGGGTATCTTTGA	-9.48051
GCF_900183975.1	s__xanthomonas fragariae	g__xanthomonas	f__xanthomonadaceae	o__xanthomonadales	c__gammaproteobacteria	p__proteobacteria	d__bacteria	TRUE	TRUE	5.6e-07	TRUE	1	GATCACCTCCTTTTG	CTCTCGCTCAGGGGGTATCTTTGA	-9.48051
GCF_012848175.1	s__xanthomonas campestris_c	g__xanthomonas	f__xanthomonadaceae	o__xanthomonadales	c__gammaproteobacteria	p__proteobacteria	d__bacteria	TRUE	TRUE	2.9e-08	TRUE	1	GATCACCTCCTTTTG	CTCTCGCTCAGGGGGTATCTTTGA	-9.48051
GCF_905142465.1	s__xanthomonas sp905142465	g__xanthomonas	f__xanthomonadaceae	o__xanthomonadales	c__gammaproteobacteria	p__proteobacteria	d__bacteria	TRUE	TRUE	2.9e-08	TRUE	1	GATCACCTCCTTTTG	CTCTCGCTCAGGGGGTATCTTTGA	-9.48051
GCF_004136375.1	s__xanthomonas oryzae	g__xanthomonas	f__xanthomonadaceae	o__xanthomonadales	c__gammaproteobacteria	p__proteobacteria	d__bacteria	TRUE	TRUE	2.9e-08	TRUE	1	GATCACCTCCTTTTG	CTCTCGCTCAGGGGGTATCTTTGA	-9.48051
GCF_001908725.1	s__xanthomonas vesicatoria	g__xanthomonas	f__xanthomonadaceae	o__xanthomonadales	c__gammaproteobacteria	p__proteobacteria	d__bacteria	TRUE	TRUE	2.9e-08	TRUE	1	GATCACCTCCTTTTG	CTCTCGCTCAGGGGGTATCTTTGA	-9.48051
GCF_900635455.1	s__yersinia intermedia	g__yersinia	f__enterobacteriaceae	o__enterobacterales	c__gammaproteobacteria	p__proteobacteria	d__bacteria	TRUE	TRUE	1.4e-08	TRUE	1	GATCACCTCCTTACC	GACATTCTCAGGGGGTATCTTTGA	-9.48051
GCF_009831415.1	s__yersinia canariae	g__yersinia	f__enterobacteriaceae	o__enterobacterales	c__gammaproteobacteria	p__proteobacteria	d__bacteria	TRUE	TRUE	2.9e-09	TRUE	1	GATCACCTCCTTACC	GCCGTTCTCAGGGGGTATCTTTGA	-9.48051
GCF_901472495.1	s__yersinia enterocolitica	g__yersinia	f__enterobacteriaceae	o__enterobacterales	c__gammaproteobacteria	p__proteobacteria	d__bacteria	TRUE	TRUE	2.9e-09	TRUE	1	GATCACCTCCTTACC	GCCGTTCTCAGGGGGTATCTTTGA	-9.48051
GCF_004124235.1	s__yersinia hibernica	g__yersinia	f__enterobacteriaceae	o__enterobacterales	c__gammaproteobacteria	p__proteobacteria	d__bacteria	TRUE	TRUE	2.9e-09	TRUE	1	GATCACCTCCTTACC	GCCGTTCTCAGGGGGTATCTTTGA	-9.48051
GCF_001047675.1	s__yersinia aleksiciae	g__yersinia	f__enterobacteriaceae	o__enterobacterales	c__gammaproteobacteria	p__proteobacteria	d__bacteria	TRUE	TRUE	2.9e-09	TRUE	1	GATCACCTCCTTACC	GCCGTTCTCAGGGGGTATCTTTGA	-9.48051
GCF_013282725.1	s__yersinia mollaretii	g__yersinia	f__enterobacteriaceae	o__enterobacterales	c__gammaproteobacteria	p__proteobacteria	d__bacteria	TRUE	TRUE	2.9e-09	TRUE	1	GATCACCTCCTTACC	GCCGTTCTCAGGGGGTATCTTTGA	-9.48051
GCA_015482585.1	s__r1dc41 sp015482585		f__r1dc41	o__bacillales_b	c__bacilli	p__firmicutes	d__bacteria	TRUE	TRUE	5.9e-07	TRUE	1	GATCACCTCCTTTCT	GCGGACTTCAGGGGGTCTCTTTGA	-9.48051
GCF_002022665.1	s__bartonella sp002022665	g__bartonella	f__rhizobiaceae_a	o__rhizobiales_a	c__alphaproteobacteria	p__proteobacteria	d__bacteria	TRUE	TRUE	1.3e-06	TRUE	1	GATCACCTCCTTTCT	AGTTTACTAAGGAGGCATCTTTAA	-9.39469
GCF_002022505.1	s__bartonella sp002022505	g__bartonella	f__rhizobiaceae_a	o__rhizobiales_a	c__alphaproteobacteria	p__proteobacteria	d__bacteria	TRUE	TRUE	2.3e-05	TRUE	1	GATCACCTCCTTTCT	AAATTGCTAAGGAGGCATCTTTGA	-9.39469
GCF_000015445.1	s__bartonella bacilliformis	g__bartonella	f__rhizobiaceae_a	o__rhizobiales_a	c__alphaproteobacteria	p__proteobacteria	d__bacteria	TRUE	TRUE	7.9e-07	TRUE	1	GATCACCTCCTTTCT	CAGTTGCTAAGGAGGCATCTTTGA	-9.39469
GCF_001281405.1	s__bartonella ancashensis	g__bartonella	f__rhizobiaceae_a	o__rhizobiales_a	c__alphaproteobacteria	p__proteobacteria	d__bacteria	TRUE	TRUE	1.2e-06	TRUE	1	GATCACCTCCTTTCT	CAACTGCTAAGGAGGCATCTTTGA	-9.39469
GCF_900537175.1	s__lentilitoribacter sp900537175	g__lentilitoribacter	f__rhizobiaceae	o__rhizobiales	c__alphaproteobacteria	p__proteobacteria	d__bacteria	TRUE	TRUE	1.2e-06	TRUE	1	GATCACCTCCTTTCT	GGGCTGCTAAGGAGGCATCTTTGA	-9.39469
GCF_017161425.1	s__marinicauda algicola	g__marinicauda	f__maricaulaceae	o__caulobacterales	c__alphaproteobacteria	p__proteobacteria	d__bacteria	TRUE	TRUE	0.0013	TRUE	1	GATCACCTCCTTTCT	GAACTGCTAAGGAGGCGTCTTTGA	-9.39469
GCF_000730165.1	s__nitrospirillum amazonense	g__nitrospirillum	f__azospirillaceae	o__azospirillales	c__alphaproteobacteria	p__proteobacteria	d__bacteria	TRUE	TRUE	8.5e-06	TRUE	1	GATCACCTCCTTTCT	ACGCTGCTAAGGAGGCATCTTTGA	-9.39469
GCF_002117145.1	s__nucleicultrix amoebiphila	g__nucleicultrix	f__nucleicultricaceae	o__caedimonadales	c__alphaproteobacteria	p__proteobacteria	d__bacteria	TRUE	TRUE	0.0078	TRUE	1	GATCACCTCCTTTCT	AGCCTCTTAAGGAGGCATCTTTGA	-9.39469
GCF_008274825.1	s__sphingobacterium hotanense	g__sphingobacterium	f__sphingobacteriaceae	o__sphingobacteriales	c__bacteroidia	p__bacteroidota	d__bacteria	TRUE	TRUE	0.00011	TRUE	1	GAATACCTCCTTTCT	ACTTCCCTAAGGAGGCATCTTTGA	-9.39469
GCF_006542355.1	s__swingsia samuiensis	g__swingsia	f__acetobacteraceae	o__acetobacterales	c__alphaproteobacteria	p__proteobacteria	d__bacteria	TRUE	TRUE	0.00017	TRUE	1	GATCACCTCCTTTCA	GCGCTGCTAAGGAGGCATCTTTAA	-9.39469
GCF_008000755.1	s__youhaiella tibetensis	g__youhaiella	f__devosiaceae	o__rhizobiales	c__alphaproteobacteria	p__proteobacteria	d__bacteria	TRUE	TRUE	0.00021	TRUE	1	GATCACCTCCTTTCT	AGCCTGCTAAGGAGGCATCTTTGA	-9.39469
GCA_016458825.1	s__miniphocibacter sp016458825	g__miniphocibacter	f__peptoniphilaceae	o__tissierellales	c__clostridia	p__firmicutes_a	d__bacteria	TRUE	TRUE	0.0056	TRUE	1	GATCACCTCCTTTCT	AAGGAGTTAGGTGATTCACTTTGA	-9.38902
GCF_000146505.1	s__fibrobacter succinogenes	g__fibrobacter	f__fibrobacteraceae	o__fibrobacterales	c__fibrobacteria	p__fibrobacterota	d__bacteria	TRUE	TRUE	0.0011	TRUE	1	GATTACCTCCTTTAA	GATAAACTCTGGGGGTATCTTTGA	-9.20093
GCF_000018945.1	s__thermotoga neapolitana	g__thermotoga	f__thermotogaceae	o__thermotogales	c__thermotogae	p__thermotogota	d__bacteria	TRUE	TRUE	0.013	TRUE	1	GATCACCTCCTTTCT	ATGGGCAGAAAGGAAGGGCTTTGA	-8.97044
GCF_002812705.1	s__achromobacter spanius	g__achromobacter	f__burkholderiaceae	o__burkholderiales	c__gammaproteobacteria	p__proteobacteria	d__bacteria	TRUE	TRUE	7.9e-06	TRUE	1	GATCACCTCCTTTCA	CAGGCTCTACGGAGGTATCTTTGA	-8.64317
GCF_013267355.1	s__achromobacter pestifer_a	g__achromobacter	f__burkholderiaceae	o__burkholderiales	c__gammaproteobacteria	p__proteobacteria	d__bacteria	TRUE	TRUE	7.9e-06	TRUE	1	GATCACCTCCTTTCA	CAGGCTCTACGGAGGTATCTTTGA	-8.64317
GCF_000165835.1	s__achromobacter xylosoxidans_b	g__achromobacter	f__burkholderiaceae	o__burkholderiales	c__gammaproteobacteria	p__proteobacteria	d__bacteria	TRUE	TRUE	7.9e-06	TRUE	1	GATCACCTCCTTTCA	CAGGCTCTACGGAGGTATCTTTGA	-8.64317
GCF_002966795.1	s__achromobacter spanius_d	g__achromobacter	f__burkholderiaceae	o__burkholderiales	c__gammaproteobacteria	p__proteobacteria	d__bacteria	TRUE	TRUE	7.9e-06	TRUE	1	GATCACCTCCTTTCA	CAGGCTCTACGGAGGTATCTTTGA	-8.64317
GCF_016127315.1	s__achromobacter insuavis_a	g__achromobacter	f__burkholderiaceae	o__burkholderiales	c__gammaproteobacteria	p__proteobacteria	d__bacteria	TRUE	TRUE	7.9e-06	TRUE	1	GATCACCTCCTTTCA	CAGGCTCTACGGAGGTATCTTTGA	-8.64317
GCF_014490035.1	s__achromobacter bronchisepticus_a	g__achromobacter	f__burkholderiaceae	o__burkholderiales	c__gammaproteobacteria	p__proteobacteria	d__bacteria	TRUE	TRUE	7.9e-06	TRUE	1	GATCACCTCCTTTCA	CAGGCTCTACGGAGGTATCTTTGA	-8.64317
GCF_013116765.2	s__achromobacter deleyi_a	g__achromobacter	f__burkholderiaceae	o__burkholderiales	c__gammaproteobacteria	p__proteobacteria	d__bacteria	TRUE	TRUE	7.9e-06	TRUE	1	GATCACCTCCTTTCA	CAGGCTCTACGGAGGTATCTTTGA	-8.64317
GCF_003994415.1	s__achromobacter spanius_c	g__achromobacter	f__burkholderiaceae	o__burkholderiales	c__gammaproteobacteria	p__proteobacteria	d__bacteria	TRUE	TRUE	7.9e-06	TRUE	1	GATCACCTCCTTTCA	CAGGCTCTACGGAGGTATCTTTGA	-8.64317
GCF_001457475.1	s__achromobacter xylosoxidans	g__achromobacter	f__burkholderiaceae	o__burkholderiales	c__gammaproteobacteria	p__proteobacteria	d__bacteria	TRUE	TRUE	7.9e-06	TRUE	1	GATCACCTCCTTTCA	CAGGCTCTACGGAGGTATCTTTGA	-8.64317
GCF_002902905.1	s__achromobacter sp002902905	g__achromobacter	f__burkholderiaceae	o__burkholderiales	c__gammaproteobacteria	p__proteobacteria	d__bacteria	TRUE	TRUE	7.9e-06	TRUE	1	GATCACCTCCTTTCA	CAGGCTCTACGGAGGTATCTTTGA	-8.64317
GCF_003600685.1	s__achromobacter spanius_b	g__achromobacter	f__burkholderiaceae	o__burkholderiales	c__gammaproteobacteria	p__proteobacteria	d__bacteria	TRUE	TRUE	7.9e-06	TRUE	1	GATCACCTCCTTTCA	CAGGCTCTACGGAGGTATCTTTGA	-8.64317
GCF_002176815.1	s__acidovorax sp002176815	g__acidovorax	f__burkholderiaceae	o__burkholderiales	c__gammaproteobacteria	p__proteobacteria	d__bacteria	TRUE	TRUE	7.7e-06	TRUE	1	GATCACCTCCTTTCT	CAAGAGTTACGGAGGTATCTTTGA	-8.64317
GCF_003669015.1	s__acidovorax sp002754495	g__acidovorax	f__burkholderiaceae	o__burkholderiales	c__gammaproteobacteria	p__proteobacteria	d__bacteria	TRUE	TRUE	0.00016	TRUE	1	GATCACCTCCTTTCT	CAAGAGTTACGGAGGTATCTTTGA	-8.64317
GCF_000302535.1	s__acidovorax sp000302535	g__acidovorax	f__burkholderiaceae	o__burkholderiales	c__gammaproteobacteria	p__proteobacteria	d__bacteria	TRUE	TRUE	6.3e-07	TRUE	1	GATCACCTCCTTTCT	GCTGAGTTACGGAGGTATCTTTGA	-8.64317
GCF_001714725.1	s__acidovorax sp001714725	g__acidovorax	f__burkholderiaceae	o__burkholderiales	c__gammaproteobacteria	p__proteobacteria	d__bacteria	TRUE	TRUE	1.8e-05	TRUE	1	GATCACCTCCTTTCT	CAAGAGTTACGGAGGTATCTTTGA	-8.64317
GCF_002157145.1	s__acidovorax carolinensis	g__acidovorax	f__burkholderiaceae	o__burkholderiales	c__gammaproteobacteria	p__proteobacteria	d__bacteria	TRUE	TRUE	2.2e-05	TRUE	1	GATCACCTCCTTTCT	CAAGAGTTACGGAGGTATCTTTGA	-8.64317
GCF_000015565.1	s__acidovorax eiseniae	g__acidovorax	f__burkholderiaceae	o__burkholderiales	c__gammaproteobacteria	p__proteobacteria	d__bacteria	TRUE	TRUE	9.8e-06	TRUE	1	GATCACCTCCTTTCT	CAAGAATTACGGAGGTATCTTTGA	-8.64317
GCF_000176855.2	s__acidovorax_a avenae	g__acidovorax_a	f__burkholderiaceae	o__burkholderiales	c__gammaproteobacteria	p__proteobacteria	d__bacteria	TRUE	TRUE	3.9e-07	TRUE	1	GATCACCTCCTTTCT	CAAGAGTTACGGAGGTATCTTTGA	-8.64317
GCF_011303755.1	s__acidovorax_c sp011303755	g__acidovorax_c	f__burkholderiaceae	o__burkholderiales	c__gammaproteobacteria	p__proteobacteria	d__bacteria	TRUE	TRUE	9.9e-08	TRUE	1	GATCACCTCCTTTCT	GCCGAGTTACGGAGGTATCTTTGA	-8.64317
GCF_014489595.1	s__acidovorax_f monticola	g__acidovorax_f	f__burkholderiaceae	o__burkholderiales	c__gammaproteobacteria	p__proteobacteria	d__bacteria	TRUE	TRUE	2.8e-06	TRUE	1	GATCACCTCCTTTCT	CAAGAGCTACGGAGGTATCTTTGA	-8.64317
GCF_000521505.1	s__advenella mimigardefordensis	g__advenella	f__burkholderiaceae	o__burkholderiales	c__gammaproteobacteria	p__proteobacteria	d__bacteria	TRUE	TRUE	4.8e-06	TRUE	1	GATCACCTCCTTTAA	GACGCGCTTCGGAGGTATCTTTGA	-8.64317
GCF_000219915.2	s__advenella kashmirensis	g__advenella	f__burkholderiaceae	o__burkholderiales	c__gammaproteobacteria	p__proteobacteria	d__bacteria	TRUE	TRUE	4.8e-06	TRUE	1	GATCACCTCCTTTAA	GACGCGCTTCGGAGGTATCTTTGA	-8.64317
GCF_002443155.1	s__alcaligenes faecalis	g__alcaligenes	f__burkholderiaceae	o__burkholderiales	c__gammaproteobacteria	p__proteobacteria	d__bacteria	TRUE	TRUE	4.7e-06	TRUE	1	GATCACCTCCTTTTA	AATGCCTTACGGAGGTATCTTTGA	-8.64317
GCF_004319585.1	s__alcaligenes faecalis_c	g__alcaligenes	f__burkholderiaceae	o__burkholderiales	c__gammaproteobacteria	p__proteobacteria	d__bacteria	TRUE	TRUE	4.7e-06	TRUE	1	GATCACCTCCTTTTA	AATGCCTTACGGAGGTATCTTTGA	-8.64317
GCF_017377875.1	s__alcaligenes sp017377875	g__alcaligenes	f__burkholderiaceae	o__burkholderiales	c__gammaproteobacteria	p__proteobacteria	d__bacteria	TRUE	TRUE	4.7e-06	TRUE	1	GATCACCTCCTTTTA	AATGCCTTACGGAGGTATCTTTGA	-8.64317
GCF_003058465.1	s__algicoccus marinus	g__algicoccus	f__burkholderiaceae	o__burkholderiales	c__gammaproteobacteria	p__proteobacteria	d__bacteria	TRUE	TRUE	0.0024	TRUE	1	GATCACCTCCTTTAA	CTGTCTGCCCGGAGGTATCTTTGA	-8.64317
GCF_000204645.1	s__alicycliphilus denitrificans	g__alicycliphilus	f__burkholderiaceae	o__burkholderiales	c__gammaproteobacteria	p__proteobacteria	d__bacteria	TRUE	TRUE	2.4e-08	TRUE	1	GATCACCTCCTTTCT	CAAGAGCTACGGAGGTATCTTTGA	-8.64317
GCF_003100395.1	s__aquabacterium olei	g__aquabacterium	f__burkholderiaceae	o__burkholderiales	c__gammaproteobacteria	p__proteobacteria	d__bacteria	TRUE	TRUE	1.2e-07	TRUE	1	GATCACCTCCTTTCT	GCTGAGCTTCGGAGGTATCTTTGA	-8.64317
GCF_017894365.1	s__aromatoleum bremense	g__aromatoleum	f__rhodocyclaceae	o__burkholderiales	c__gammaproteobacteria	p__proteobacteria	d__bacteria	TRUE	TRUE	2.7e-07	TRUE	1	GATCACCTCCTTTCA	CGTGAACTTCGGAGGTATCTTTGA	-8.64317
GCF_000025965.1	s__aromatoleum aromaticum	g__aromatoleum	f__rhodocyclaceae	o__burkholderiales	c__gammaproteobacteria	p__proteobacteria	d__bacteria	TRUE	TRUE	3.4e-07	TRUE	1	GATCACCTCCTTTCA	CGCGAACTCCGGAGGTATCTTTGA	-8.64317
GCF_017894385.1	s__aromatoleum petrolei	g__aromatoleum	f__rhodocyclaceae	o__burkholderiales	c__gammaproteobacteria	p__proteobacteria	d__bacteria	TRUE	TRUE	1.4e-07	TRUE	1	GATCACCTCCTTTCA	CGCGAACTTCGGAGGTATCTTTGA	-8.64317
GCF_000349945.1	s__aromatoleum sp000349945	g__aromatoleum	f__rhodocyclaceae	o__burkholderiales	c__gammaproteobacteria	p__proteobacteria	d__bacteria	TRUE	TRUE	2.8e-07	TRUE	1	GATCACCTCCTTTCA	CGCGAACTTCGGAGGTATCTTTGA	-8.64317
GCF_018906035.1	s__azo-2 sp018906035	g__azo-2	f__rhodocyclaceae	o__burkholderiales	c__gammaproteobacteria	p__proteobacteria	d__bacteria	TRUE	TRUE	2.9e-07	TRUE	1	GATCACCTCCTTTCT	GCGGAACTTCGGAGGTATCTTTGA	-8.64317
GCF_006496635.1	s__azoarcus sp006496635	g__azoarcus	f__rhodocyclaceae	o__burkholderiales	c__gammaproteobacteria	p__proteobacteria	d__bacteria	TRUE	TRUE	1.1e-05	TRUE	1	GATCACCTCCTTTCA	CGCGAACTCCGGAGGTATCTTTGA	-8.64317
GCF_001682385.1	s__azoarcus olearius	g__azoarcus	f__rhodocyclaceae	o__burkholderiales	c__gammaproteobacteria	p__proteobacteria	d__bacteria	TRUE	TRUE	1.1e-05	TRUE	1	GATCACCTCCTTTCA	CGCGAACTCCGGAGGTATCTTTGA	-8.64317
GCF_003111665.1	s__azoarcus_c communis_b	g__azoarcus_c	f__rhodocyclaceae	o__burkholderiales	c__gammaproteobacteria	p__proteobacteria	d__bacteria	TRUE	TRUE	2.8e-06	TRUE	1	GATCACCTCCTTTCA	CGCGAACTCCGGAGGTATCTTTGA	-8.64317
GCF_003111645.1	s__azoarcus_c communis_a	g__azoarcus_c	f__rhodocyclaceae	o__burkholderiales	c__gammaproteobacteria	p__proteobacteria	d__bacteria	TRUE	TRUE	2.8e-06	TRUE	1	GATCACCTCCTTTCA	CGCGAACTCCGGAGGTATCTTTGA	-8.64317
GCF_002872475.1	s__azoarcus_d pumilus	g__azoarcus_d	f__rhodocyclaceae	o__burkholderiales	c__gammaproteobacteria	p__proteobacteria	d__bacteria	TRUE	TRUE	1.8e-06	TRUE	1	GATCACCTCCTTTCA	GCGGAACTGCGGAGGTATCTTTGA	-8.64317
GCF_016864195.1	s__azonexus sp016864195	g__azonexus	f__rhodocyclaceae	o__burkholderiales	c__gammaproteobacteria	p__proteobacteria	d__bacteria	TRUE	TRUE	1.7e-08	TRUE	1	GATCACCTCCTTTCT	GCCGAGCTGCGGAGGTATCTTTGA	-8.64317
GCF_003441615.1	s__azonexus sp003441615	g__azonexus	f__rhodocyclaceae	o__burkholderiales	c__gammaproteobacteria	p__proteobacteria	d__bacteria	TRUE	TRUE	9.8e-07	TRUE	1	GATCACCTCCTTTCT	GCCGAGCTGCGGAGGTATCTTTGA	-8.64317
GCF_016858125.1	s__azospira_a restricta	g__azospira_a	f__rhodocyclaceae	o__burkholderiales	c__gammaproteobacteria	p__proteobacteria	d__bacteria	TRUE	TRUE	1.8e-06	TRUE	1	GATCACCTCCTTTCT	GGCGAGCTCCGGAGGTATCTTTGA	-8.64317
GCF_002872415.1	s__bacteriovorax stolpii	g__bacteriovorax	f__bacteriovoracaceae	o__bacteriovoracales	c__bacteriovoracia	p__bdellovibrionota	d__bacteria	TRUE	TRUE	9.4e-05	TRUE	1	GATCACCTCCTTTTA	GATCTTCTGCGGAGGTCGCTTTGA	-8.64317
GCF_000306945.1	s__bordetella pertussis	g__bordetella	f__burkholderiaceae	o__burkholderiales	c__gammaproteobacteria	p__proteobacteria	d__bacteria	TRUE	TRUE	4.1e-06	TRUE	1	GATCACCTCCTTTAA	CAGGCTCTACGGAGGTATCTTTGA	-8.64317
GCF_002119725.1	s__bordetella_c sp002119725	g__bordetella_c	f__burkholderiaceae	o__burkholderiales	c__gammaproteobacteria	p__proteobacteria	d__bacteria	TRUE	TRUE	4.8e-06	TRUE	1	GATCACCTCCTTTCA	CAGGCGCTACGGAGGTATCTTTGA	-8.64317
GCF_001676705.1	s__bordetella_c bronchialis	g__bordetella_c	f__burkholderiaceae	o__burkholderiales	c__gammaproteobacteria	p__proteobacteria	d__bacteria	TRUE	TRUE	7.9e-06	TRUE	1	GATCACCTCCTTTCA	CAGGCTCTACGGAGGTATCTTTGA	-8.64317
GCF_001676725.1	s__bordetella_c flabilis	g__bordetella_c	f__burkholderiaceae	o__burkholderiales	c__gammaproteobacteria	p__proteobacteria	d__bacteria	TRUE	TRUE	7.9e-06	TRUE	1	GATCACCTCCTTTCA	CAGGCTCTACGGAGGTATCTTTGA	-8.64317
GCF_002119685.1	s__bordetella_c sp002119685	g__bordetella_c	f__burkholderiaceae	o__burkholderiales	c__gammaproteobacteria	p__proteobacteria	d__bacteria	TRUE	TRUE	3.3e-06	TRUE	1	GATCACCTCCTTTCA	AAGGCGCTACGGAGGTATCTTTGA	-8.64317
GCF_001704295.1	s__bordetella_c sp001704295	g__bordetella_c	f__burkholderiaceae	o__burkholderiales	c__gammaproteobacteria	p__proteobacteria	d__bacteria	TRUE	TRUE	1.9e-06	TRUE	1	GATCACCTCCTTTCA	CAGGCTCTACGGAGGTATCTTTGA	-8.64317
GCF_003258315.1	s__bradymonas sediminis	g__bradymonas	f__bradymonadaceae	o__bradymonadales	c__bradymonadia	p__myxococcota	d__bacteria	TRUE	TRUE	1.3e-07	TRUE	1	GATCACCTCCTTTAA	GCAGAACTCCGGAGGTATCTTTGA	-8.64317
GCF_007431345.1	s__chitinimonas arctica	g__chitinimonas	f__chitinimonadaceae	o__burkholderiales	c__gammaproteobacteria	p__proteobacteria	d__bacteria	TRUE	TRUE	2.6e-07	TRUE	1	GATCACCTCCTTTCT	GACGAACTTCGGAGGTATCTTTGA	-8.64317
GCF_900169085.1	s__chlamydia suis	g__chlamydia	f__chlamydiaceae	o__chlamydiales	c__chlamydiia	p__chlamydiota	d__bacteria	TRUE	TRUE	0.0017	TRUE	1	GATCACCTCCTTTTA	GCTTTAACTCGGAGGTCTCTTTGA	-8.64317
GCF_000012125.1	s__chlamydia trachomatis	g__chlamydia	f__chlamydiaceae	o__chlamydiales	c__chlamydiia	p__chlamydiota	d__bacteria	TRUE	TRUE	0.0017	TRUE	1	GATCACCTCCTTTTA	GCTTTAACTCGGAGGTCTCTTTGA	-8.64317
GCF_000006685.1	s__chlamydia muridarum	g__chlamydia	f__chlamydiaceae	o__chlamydiales	c__chlamydiia	p__chlamydiota	d__bacteria	TRUE	TRUE	0.0034	TRUE	1	GATCACCTCCTTTTA	TCTTTAACTCGGAGGTTTCTTTGA	-8.64317
GCF_018304765.1	s__chloracidobacterium aggregatum	g__chloracidobacterium	f__chloracidobacteriaceae	o__chloracidobacteriales	c__blastocatellia	p__acidobacteriota	d__bacteria	TRUE	TRUE	0.004	TRUE	1	GATCACCTCCTTTCT	ACCCACCTGCGGAGGTTTCTTTGA	-8.64317
GCF_018304825.1	s__chloracidobacterium validum	g__chloracidobacterium	f__chloracidobacteriaceae	o__chloracidobacteriales	c__blastocatellia	p__acidobacteriota	d__bacteria	TRUE	TRUE	0.0012	TRUE	1	GATCACCTCCTTTCT	ACGCACTTGCGGAGGTTCCTTTGA	-8.64317
GCF_000226295.1	s__chloracidobacterium thermophilum	g__chloracidobacterium	f__chloracidobacteriaceae	o__chloracidobacteriales	c__blastocatellia	p__acidobacteriota	d__bacteria	TRUE	TRUE	0.004	TRUE	1	GATCACCTCCTTTCT	ACCCACCTGCGGAGGTTTCTTTGA	-8.64317
GCF_000146065.2	s__cloacimonas acidaminovorans	g__cloacimonas	f__cloacimonadaceae	o__cloacimonadales	c__cloacimonadia	p__cloacimonadota	d__bacteria	TRUE	TRUE	0.0018	TRUE	1	GATCACCTCCTTTAT	TCTGAAATTCGGAGGTTACTTTGA	-8.64317
GCF_001584185.1	s__collimonas pratensis	g__collimonas	f__burkholderiaceae	o__burkholderiales	c__gammaproteobacteria	p__proteobacteria	d__bacteria	TRUE	TRUE	7.9e-06	TRUE	1	GATCACCTCCTTTCT	GCCGAACTTCGGAGGTATCTTTGA	-8.64317
GCF_001584145.1	s__collimonas fungivorans	g__collimonas	f__burkholderiaceae	o__burkholderiales	c__gammaproteobacteria	p__proteobacteria	d__bacteria	TRUE	TRUE	7.9e-06	TRUE	1	GATCACCTCCTTTCT	GCCGAACTACGGAGGTATCTTTGA	-8.64317
GCF_000786695.1	s__collimonas arenae_a	g__collimonas	f__burkholderiaceae	o__burkholderiales	c__gammaproteobacteria	p__proteobacteria	d__bacteria	TRUE	TRUE	7.9e-06	TRUE	1	GATCACCTCCTTTCT	GCCGAACTTCGGAGGTATCTTTGA	-8.64317
GCF_001584165.1	s__collimonas arenae	g__collimonas	f__burkholderiaceae	o__burkholderiales	c__gammaproteobacteria	p__proteobacteria	d__bacteria	TRUE	TRUE	7.9e-06	TRUE	1	GATCACCTCCTTTCT	GCTGAACTACGGAGGTATCTTTGA	-8.64317
GCF_000221045.1	s__collimonas fungivorans_a	g__collimonas	f__burkholderiaceae	o__burkholderiales	c__gammaproteobacteria	p__proteobacteria	d__bacteria	TRUE	TRUE	7.9e-06	TRUE	1	GATCACCTCCTTTCT	GCCGAACTACGGAGGTATCTTTGA	-8.64317
GCF_014076495.1	s__comamonas koreensis	g__comamonas	f__burkholderiaceae	o__burkholderiales	c__gammaproteobacteria	p__proteobacteria	d__bacteria	TRUE	TRUE	1.7e-08	TRUE	1	GATCACCTCCTTTCT	GAAGAGCTTCGGAGGTATCTTTGA	-8.64317
GCF_013363755.1	s__comamonas antarcticus	g__comamonas	f__burkholderiaceae	o__burkholderiales	c__gammaproteobacteria	p__proteobacteria	d__bacteria	TRUE	TRUE	2e-07	TRUE	1	GATCACCTCCTTTCT	GCAGATCTACGGAGGTATCTTTGA	-8.64317
GCF_014076415.1	s__comamonas testosteroni_f	g__comamonas	f__burkholderiaceae	o__burkholderiales	c__gammaproteobacteria	p__proteobacteria	d__bacteria	TRUE	TRUE	2.3e-07	TRUE	1	GATCACCTCCTTTCT	GCCGATCTCCGGAGGTATCTTTGA	-8.64317
GCF_000739375.1	s__comamonas testosteroni_b	g__comamonas	f__burkholderiaceae	o__burkholderiales	c__gammaproteobacteria	p__proteobacteria	d__bacteria	TRUE	TRUE	2e-07	TRUE	1	GATCACCTCCTTTCT	GCAGATCTCCGGAGGTATCTTTGA	-8.64317
GCF_019186805.1	s__comamonas sp019186805	g__comamonas	f__burkholderiaceae	o__burkholderiales	c__gammaproteobacteria	p__proteobacteria	d__bacteria	TRUE	TRUE	1.4e-07	TRUE	1	GATCACCTCCTTTCT	GCAGATCTCCGGAGGTATCTTTGA	-8.64317
GCF_007954405.1	s__comamonas_c sp007954405	g__comamonas_c	f__burkholderiaceae	o__burkholderiales	c__gammaproteobacteria	p__proteobacteria	d__bacteria	TRUE	TRUE	1.8e-06	TRUE	1	GATCACCTCCTTTCT	GAGGCCCTGCGGAGGTATCTTTGA	-8.64317
GCF_019195435.1	s__comamonas_c sp019195435	g__comamonas_c	f__burkholderiaceae	o__burkholderiales	c__gammaproteobacteria	p__proteobacteria	d__bacteria	TRUE	TRUE	1.8e-06	TRUE	1	GATCACCTCCTTTCT	GAGGCCTTGCGGAGGTATCTTTGA	-8.64317
GCF_000025905.1	s__coraliomargarita akajimensis	g__coraliomargarita	f__dsm-45221	o__opitutales	c__verrucomicrobiae	p__verrucomicrobiota	d__bacteria	TRUE	TRUE	8.2e-07	TRUE	1	GATCACCTCCTTTCT	GGCCATATCTGGAGGTATCTTTGA	-8.64317
GCF_000815025.1	s__coxiella sp000815025	g__coxiella	f__coxiellaceae	o__coxiellales	c__gammaproteobacteria	p__proteobacteria	d__bacteria	TRUE	TRUE	7.8e-05	TRUE	1	GATCACCTCCTTAAA	TTGGACTTGTGGAGGTATCTTTGA	-8.64317
GCF_902813185.1	s__denitratisoma oestradiolicum	g__denitratisoma	f__rhodocyclaceae	o__burkholderiales	c__gammaproteobacteria	p__proteobacteria	d__bacteria	TRUE	TRUE	1.5e-07	TRUE	1	GATCACCTCCTTTCT	AATGAACTTCGGAGGTATCTTTGA	-8.64317
GCA_017309585.1	s__denitromonas sp017309585	g__denitromonas	f__rhodocyclaceae	o__burkholderiales	c__gammaproteobacteria	p__proteobacteria	d__bacteria	TRUE	TRUE	1.1e-05	TRUE	1	GATCACCTCCTTTCC	CAGGAACTACGGAGGTATCTTTGA	-8.64317
GCF_010983895.1	s__denitromonas sp010983895	g__denitromonas	f__rhodocyclaceae	o__burkholderiales	c__gammaproteobacteria	p__proteobacteria	d__bacteria	TRUE	TRUE	1.1e-05	TRUE	1	GATCACCTCCTTTCC	CAGGAACTACGGAGGTATCTTTGA	-8.64317
GCF_014395975.1	s__diaphorobacter_a ruginosibacter	g__diaphorobacter_a	f__burkholderiaceae	o__burkholderiales	c__gammaproteobacteria	p__proteobacteria	d__bacteria	TRUE	TRUE	1.1e-07	TRUE	1	GATCACCTCCTTTCT	GAAGAGCTTCGGAGGTATCTTTGA	-8.64317
GCF_011305995.1	s__diaphorobacter_a sp011305995	g__diaphorobacter_a	f__burkholderiaceae	o__burkholderiales	c__gammaproteobacteria	p__proteobacteria	d__bacteria	TRUE	TRUE	8.7e-07	TRUE	1	GATCACCTCCTTTCT	CAAGAGCTTCGGAGGTATCTTTGA	-8.64317
GCF_011305535.1	s__diaphorobacter_a sp011305535	g__diaphorobacter_a	f__burkholderiaceae	o__burkholderiales	c__gammaproteobacteria	p__proteobacteria	d__bacteria	TRUE	TRUE	2e-06	TRUE	1	GATCACCTCCTTTCT	GAAGAGCTTCGGAGGTATCTTTGA	-8.64317
GCF_012849375.1	s__duganella sp003217375	g__duganella	f__burkholderiaceae	o__burkholderiales	c__gammaproteobacteria	p__proteobacteria	d__bacteria	TRUE	TRUE	1.3e-05	TRUE	1	GATCACCTCCTTTCT	GCCGAACTTCGGAGGTATCTTTGA	-8.64317
GCF_000974685.2	s__ferriphaselus amnicola	g__ferriphaselus	f__gallionellaceae	o__burkholderiales	c__gammaproteobacteria	p__proteobacteria	d__bacteria	TRUE	TRUE	2.1e-05	TRUE	1	GATCACCTCCTTTCT	GCCGAGCTGCGGAGGTATCTTTGA	-8.64317
GCF_016110345.1	s__fluviibacter phosphoraccumulans	g__fluviibacter	f__rhodocyclaceae	o__burkholderiales	c__gammaproteobacteria	p__proteobacteria	d__bacteria	TRUE	TRUE	3.6e-05	TRUE	1	GATCACCTCCTTTCT	ACGGGTCTCCGGAGGTATCTTTGA	-8.64317
GCF_000145255.1	s__gallionella capsiferriformans	g__gallionella	f__gallionellaceae	o__burkholderiales	c__gammaproteobacteria	p__proteobacteria	d__bacteria	TRUE	TRUE	2.3e-05	TRUE	1	GATCACCTCCTTTCT	AATGAATTACGGAGGTATCTTTGA	-8.64317
GCF_018324385.1	s__gallionella kumadai	g__gallionella	f__gallionellaceae	o__burkholderiales	c__gammaproteobacteria	p__proteobacteria	d__bacteria	TRUE	TRUE	4.5e-07	TRUE	1	GATCACCTCCTTTCT	GCCGAACTACGGAGGTATCTTTGA	-8.64317
GCF_000010305.1	s__gemmatimonas aurantiaca	g__gemmatimonas	f__gemmatimonadaceae	o__gemmatimonadales	c__gemmatimonadetes	p__gemmatimonadota	d__bacteria	TRUE	TRUE	0.0071	TRUE	1	GATCACCTCCTTTCC	GCGGACATGCGGAGGTATCTTTGA	-8.64317
GCF_000695095.2	s__gemmatimonas phototrophica	g__gemmatimonas	f__gemmatimonadaceae	o__gemmatimonadales	c__gemmatimonadetes	p__gemmatimonadota	d__bacteria	TRUE	TRUE	0.0072	TRUE	1	GATCACCTCCTTTCC	GCGGACATCCGGAGGTATCTTTGA	-8.64317
GCF_013004105.1	s__gemmatimonas sp013004105	g__gemmatimonas	f__gemmatimonadaceae	o__gemmatimonadales	c__gemmatimonadetes	p__gemmatimonadota	d__bacteria	TRUE	TRUE	0.022	TRUE	1	GATCACCTCCTTTCT	GTGGACATGCGGAGGTATCTTTGA	-8.64317
GCF_000522985.1	s__gemmatirosa kalamazoonesis	g__gemmatirosa	f__gemmatimonadaceae	o__gemmatimonadales	c__gemmatimonadetes	p__gemmatimonadota	d__bacteria	TRUE	TRUE	0.003	TRUE	1	GATCACCTCCTTACC	TCCGAACTGCGGAGGTATCTTTGA	-8.64317
GCF_000827125.1	s__geoalkalibacter_a subterraneus	g__geoalkalibacter_a	f__geoalkalibacteraceae	o__desulfuromonadales	c__desulfuromonadia	p__desulfobacterota	d__bacteria	TRUE	TRUE	3.5e-05	TRUE	1	GATCACCTCCTTTCT	CGCGAACTCTGGAGGTATCTTTGA	-8.64317
GCF_016917355.1	s__glaciimonas sp016917355	g__glaciimonas	f__burkholderiaceae	o__burkholderiales	c__gammaproteobacteria	p__proteobacteria	d__bacteria	TRUE	TRUE	0.0014	TRUE	1	GATCACCTCCTTTCT	ATCGAACTACGGAGGTATCTTTGA	-8.64317
GCF_000012985.1	s__hahella chejuensis	g__hahella	f__oleiphilaceae	o__pseudomonadales	c__gammaproteobacteria	p__proteobacteria	d__bacteria	TRUE	TRUE	2e-09	TRUE	1	GATCACCTCCTTAAA	GAATCTTTGCGGAGGTATCTTTGA	-8.64317
GCF_004135205.1	s__hahella sp004135205	g__hahella	f__oleiphilaceae	o__pseudomonadales	c__gammaproteobacteria	p__proteobacteria	d__bacteria	TRUE	TRUE	4e-09	TRUE	1	GATCACCTCCTTAAA	GAATCTTTACGGAGGTATCTTTGA	-8.64317
GCF_000210915.2	s__halobacteriovorax marinus	g__halobacteriovorax	f__bacteriovoracaceae	o__bacteriovoracales	c__bacteriovoracia	p__bdellovibrionota	d__bacteria	TRUE	TRUE	0.00039	TRUE	1	GATCACCTCCTTTTA	GAAAACTTACGGAGGTCACTTTGA	-8.64317
GCA_005144965.1	s__hankyongella ginsenosidimutans	g__hankyongella	f__sphingomonadaceae	o__sphingomonadales	c__alphaproteobacteria	p__proteobacteria	d__bacteria	TRUE	TRUE	0.0012	TRUE	1	GATCACCTCCTTTCT	TCGCTGTTGCGGAGGTTTCTTTGA	-8.64317
GCF_004367745.1	s__herbaspirillum huttiense	g__herbaspirillum	f__burkholderiaceae	o__burkholderiales	c__gammaproteobacteria	p__proteobacteria	d__bacteria	TRUE	TRUE	4e-06	TRUE	1	GATCACCTCCTTTCT	ACCGAGCTTCGGAGGTATCTTTGA	-8.64317
GCF_001267925.1	s__herbaspirillum hiltneri	g__herbaspirillum	f__burkholderiaceae	o__burkholderiales	c__gammaproteobacteria	p__proteobacteria	d__bacteria	TRUE	TRUE	4.6e-05	TRUE	1	GATCACCTCCTTTCT	GCTGAATTACGGAGGTATCTTTGA	-8.64317
GCF_002257565.1	s__herbaspirillum sp002257565	g__herbaspirillum	f__burkholderiaceae	o__burkholderiales	c__gammaproteobacteria	p__proteobacteria	d__bacteria	TRUE	TRUE	4.6e-05	TRUE	1	GATCACCTCCTTTCT	GCTGAATTACGGAGGTATCTTTGA	-8.64317
GCF_003719195.1	s__herbaspirillum rubrisubalbicans	g__herbaspirillum	f__burkholderiaceae	o__burkholderiales	c__gammaproteobacteria	p__proteobacteria	d__bacteria	TRUE	TRUE	4e-06	TRUE	1	GATCACCTCCTTTCT	ACCGAGCTTCGGAGGTATCTTTGA	-8.64317
GCF_001040945.1	s__herbaspirillum seropedicae	g__herbaspirillum	f__burkholderiaceae	o__burkholderiales	c__gammaproteobacteria	p__proteobacteria	d__bacteria	TRUE	TRUE	4e-06	TRUE	1	GATCACCTCCTTTCT	ACCGAGCTACGGAGGTATCTTTGA	-8.64317
GCF_000013625.1	s__herminiimonas sp000013625	g__herminiimonas	f__burkholderiaceae	o__burkholderiales	c__gammaproteobacteria	p__proteobacteria	d__bacteria	TRUE	TRUE	2.3e-05	TRUE	1	GATCACCTCCTTTCT	ACCGAACTCCGGAGGTATCTTTGA	-8.64317
GCF_900130075.1	s__herminiimonas arsenitoxidans	g__herminiimonas	f__burkholderiaceae	o__burkholderiales	c__gammaproteobacteria	p__proteobacteria	d__bacteria	TRUE	TRUE	2.3e-05	TRUE	1	GATCACCTCCTTTCT	ACCGAACTTCGGAGGTATCTTTGA	-8.64317
GCF_004795855.1	s__hydrogenophaga sp004795855	g__hydrogenophaga	f__burkholderiaceae	o__burkholderiales	c__gammaproteobacteria	p__proteobacteria	d__bacteria	TRUE	TRUE	1.5e-06	TRUE	1	GATCACCTCCTTTCT	GGCGAGTTACGGAGGTATCTTTGA	-8.64317
GCF_001761385.1	s__hydrogenophaga crassostreae	g__hydrogenophaga	f__burkholderiaceae	o__burkholderiales	c__gammaproteobacteria	p__proteobacteria	d__bacteria	TRUE	TRUE	4e-07	TRUE	1	GATCACCTCCTTTCT	GCCGAGTTACGGAGGTATCTTTGA	-8.64317
GCF_001713375.1	s__hydrogenophaga sp001713375	g__hydrogenophaga	f__burkholderiaceae	o__burkholderiales	c__gammaproteobacteria	p__proteobacteria	d__bacteria	TRUE	TRUE	1.3e-06	TRUE	1	GATCACCTCCTTTCT	GTCGAGCTCCGGAGGTATCTTTGA	-8.64317
GCF_010104355.1	s__hydrogenophaga sp010104355	g__hydrogenophaga	f__burkholderiaceae	o__burkholderiales	c__gammaproteobacteria	p__proteobacteria	d__bacteria	TRUE	TRUE	1.3e-06	TRUE	1	GATCACCTCCTTTCT	GTCGAGCTCCGGAGGTATCTTTGA	-8.64317
GCF_011388215.1	s__hydrogenophaga sp011388215	g__hydrogenophaga	f__burkholderiaceae	o__burkholderiales	c__gammaproteobacteria	p__proteobacteria	d__bacteria	TRUE	TRUE	4.8e-07	TRUE	1	GATCACCTCCTTTCT	GTCGAACTGCGGAGGTATCTTTGA	-8.64317
GCF_009859475.1	s__hydrogenophaga sp009859475	g__hydrogenophaga	f__burkholderiaceae	o__burkholderiales	c__gammaproteobacteria	p__proteobacteria	d__bacteria	TRUE	TRUE	1.3e-06	TRUE	1	GATCACCTCCTTTCT	GTCGAGCTCCGGAGGTATCTTTGA	-8.64317
GCF_003574215.1	s__hydrogenophilus thermoluteolus	g__hydrogenophilus	f__rhodocyclaceae	o__burkholderiales	c__gammaproteobacteria	p__proteobacteria	d__bacteria	TRUE	TRUE	0.00016	TRUE	1	GATCACCTCCTTTCA	GACGAACTCCGGAGGTATCTTTGA	-8.64317
GCF_013334205.1	s__hylemonella sp013334205	g__hylemonella	f__burkholderiaceae	o__burkholderiales	c__gammaproteobacteria	p__proteobacteria	d__bacteria	TRUE	TRUE	1.7e-06	TRUE	1	GATCACCTCCTTTCT	GTCGAGCTCCGGAGGTATCTTTGA	-8.64317
GCF_006517255.1	s__janthinobacterium tructae	g__janthinobacterium	f__burkholderiaceae	o__burkholderiales	c__gammaproteobacteria	p__proteobacteria	d__bacteria	TRUE	TRUE	6.8e-05	TRUE	1	GATCACCTCCTTTCT	GCCGAACTTCGGAGGTATCTTTGA	-8.64317
GCF_002002885.1	s__janthinobacterium sp002002885	g__janthinobacterium	f__burkholderiaceae	o__burkholderiales	c__gammaproteobacteria	p__proteobacteria	d__bacteria	TRUE	TRUE	6.8e-05	TRUE	1	GATCACCTCCTTTCT	GCCGAACTTCGGAGGTATCTTTGA	-8.64317
GCF_001865675.1	s__janthinobacterium sp001865675	g__janthinobacterium	f__burkholderiaceae	o__burkholderiales	c__gammaproteobacteria	p__proteobacteria	d__bacteria	TRUE	TRUE	0.00051	TRUE	1	GATCACCTCCTTTCT	GCCGAACTTCGGAGGTATCTTTGA	-8.64317
GCF_003667705.1	s__janthinobacterium sp001758725	g__janthinobacterium	f__burkholderiaceae	o__burkholderiales	c__gammaproteobacteria	p__proteobacteria	d__bacteria	TRUE	TRUE	6.8e-05	TRUE	1	GATCACCTCCTTTCT	GCCGAACTTCGGAGGTATCTTTGA	-8.64317
GCF_000723165.1	s__janthinobacterium agaricidamnosum	g__janthinobacterium	f__burkholderiaceae	o__burkholderiales	c__gammaproteobacteria	p__proteobacteria	d__bacteria	TRUE	TRUE	4.3e-05	TRUE	1	GATCACCTCCTTTCT	GCCGAACTTCGGAGGTATCTTTGA	-8.64317
GCF_000319245.1	s__kinetoplastibacterium blastocrithidii	g__kinetoplastibacterium	f__burkholderiaceae_a	o__burkholderiales	c__gammaproteobacteria	p__proteobacteria	d__bacteria	TRUE	TRUE	6.8e-05	TRUE	1	GATCACCTCCTTTAA	TTAGACCTTCGGAGGTATCTTTGA	-8.64317
GCF_001746835.1	s__lacunisphaera limnophila	g__lacunisphaera	f__opitutaceae	o__opitutales	c__verrucomicrobiae	p__verrucomicrobiota	d__bacteria	TRUE	TRUE	0.0034	TRUE	1	GATCACCTCCTTTTT	GGCTACTTATGGAGGTTTCTTTGA	-8.64317
GCF_900186965.1	s__legionella_c spiritensis	g__legionella_c	f__legionellaceae	o__legionellales	c__gammaproteobacteria	p__proteobacteria	d__bacteria	TRUE	TRUE	3.6e-06	TRUE	1	GATCACCTCCTTAAA	CAGGCTCTTCGGAGGTATCTTTGA	-8.64317
GCF_013004065.1	s__limnobacter sp002954425	g__limnobacter	f__burkholderiaceae	o__burkholderiales	c__gammaproteobacteria	p__proteobacteria	d__bacteria	TRUE	TRUE	2.8e-06	TRUE	1	GATCACCTCCTTTCT	GGCCAGTTGCGGAGGTATCTTTGA	-8.64317
GCF_008254045.1	s__limnoglobus roseus	g__limnoglobus	f__gemmataceae	o__gemmatales	c__planctomycetia	p__planctomycetota	d__bacteria	TRUE	TRUE	0.0017	TRUE	1	GATCACCTCCTTTCT	GCCCAACTCCGGAGGTCACTTTGA	-8.64317
GCF_001412575.1	s__limnohabitans_a sp001412575	g__limnohabitans_a	f__burkholderiaceae	o__burkholderiales	c__gammaproteobacteria	p__proteobacteria	d__bacteria	TRUE	TRUE	1.6e-08	TRUE	1	GATCACCTCCTTTCT	GAAGATTTACGGAGGTATCTTTGA	-8.64317
GCF_002795805.1	s__mariprofundus aestuarium	g__mariprofundus	f__mariprofundaceae	o__mariprofundales	c__zetaproteobacteria	p__proteobacteria	d__bacteria	TRUE	TRUE	0.0013	TRUE	1	GATCACCTCCTTTTA	GATGCCATGCGGAGGTCACTTTGA	-8.64317
GCF_002795825.1	s__mariprofundus ferrinatatus	g__mariprofundus	f__mariprofundaceae	o__mariprofundales	c__zetaproteobacteria	p__proteobacteria	d__bacteria	TRUE	TRUE	0.0021	TRUE	1	GATCACCTCCTTTTA	GATACTATGCGGAGGTCACTTTGA	-8.64317
GCF_012849555.1	s__massilia sp012849555	g__massilia	f__burkholderiaceae	o__burkholderiales	c__gammaproteobacteria	p__proteobacteria	d__bacteria	TRUE	TRUE	3.6e-06	TRUE	1	GATCACCTCCTTTCT	GCCGAACTTCGGAGGTATCTTTGA	-8.64317
GCF_014171595.1	s__massilia sp014171595	g__massilia	f__burkholderiaceae	o__burkholderiales	c__gammaproteobacteria	p__proteobacteria	d__bacteria	TRUE	TRUE	8.4e-07	TRUE	1	GATCACCTCCTTTCT	GCCGAACTTCGGAGGTATCTTTGA	-8.64317
GCF_015101885.1	s__massilia sp015101885	g__massilia	f__burkholderiaceae	o__burkholderiales	c__gammaproteobacteria	p__proteobacteria	d__bacteria	TRUE	TRUE	6.8e-06	TRUE	1	GATCACCTCCTTTCT	GCCGAACTTCGGAGGTATCTTTGA	-8.64317
GCF_002752675.1	s__massilia violaceinigra	g__massilia	f__burkholderiaceae	o__burkholderiales	c__gammaproteobacteria	p__proteobacteria	d__bacteria	TRUE	TRUE	1.3e-05	TRUE	1	GATCACCTCCTTTCT	GCCGAACTTCGGAGGTATCTTTGA	-8.64317
GCF_001941825.1	s__massilia putida	g__massilia	f__burkholderiaceae	o__burkholderiales	c__gammaproteobacteria	p__proteobacteria	d__bacteria	TRUE	TRUE	3.6e-06	TRUE	1	GATCACCTCCTTTCT	GCCGAACTTCGGAGGTATCTTTGA	-8.64317
GCF_001412595.2	s__massilia sp001412595	g__massilia	f__burkholderiaceae	o__burkholderiales	c__gammaproteobacteria	p__proteobacteria	d__bacteria	TRUE	TRUE	2.6e-06	TRUE	1	GATCACCTCCTTTCT	GCCGAACTTCGGAGGTATCTTTGA	-8.64317
GCF_015689335.1	s__massilia sp001485665	g__massilia	f__burkholderiaceae	o__burkholderiales	c__gammaproteobacteria	p__proteobacteria	d__bacteria	TRUE	TRUE	1.3e-05	TRUE	1	GATCACCTCCTTTCT	GCCGAACTTCGGAGGTATCTTTGA	-8.64317
GCF_003008575.1	s__melaminivora_a sp003008575	g__melaminivora_a	f__burkholderiaceae	o__burkholderiales	c__gammaproteobacteria	p__proteobacteria	d__bacteria	TRUE	TRUE	8.4e-09	TRUE	1	GATCACCTCCTTTCT	CAGGAATTACGGAGGTATCTTTGA	-8.64317
GCF_001713355.1	s__methyloversatilis sp001713355	g__methyloversatilis	f__rhodocyclaceae	o__burkholderiales	c__gammaproteobacteria	p__proteobacteria	d__bacteria	TRUE	TRUE	1.9e-07	TRUE	1	GATCACCTCCTTTCT	GGCGAACTGCGGAGGTATCTTTGA	-8.64317
GCF_001636015.1	s__moraxella ovis	g__moraxella	f__moraxellaceae	o__pseudomonadales	c__gammaproteobacteria	p__proteobacteria	d__bacteria	TRUE	TRUE	2.4e-09	TRUE	1	GATCACCTCCTTAAC	CAAGACCTTCGGAGGTATCTTTGA	-8.64317
GCF_910593725.1	s__mycetohabitans tarda	g__mycetohabitans	f__burkholderiaceae	o__burkholderiales	c__gammaproteobacteria	p__proteobacteria	d__bacteria	TRUE	TRUE	2.7e-07	TRUE	1	GATCACCTCCTTTCT	GAAGAACTACGGAGGTATCTTTGA	-8.64317
GCF_002310495.1	s__nibricoccus aquaticus	g__nibricoccus	f__opitutaceae	o__opitutales	c__verrucomicrobiae	p__verrucomicrobiota	d__bacteria	TRUE	TRUE	0.00013	TRUE	1	GATCACCTCCTTTCT	GGGCATCTATGGAGGTTTCTTTGA	-8.64317
GCF_001455205.1	s__nitrosomonas ureae	g__nitrosomonas	f__nitrosomonadaceae	o__burkholderiales	c__gammaproteobacteria	p__proteobacteria	d__bacteria	TRUE	TRUE	2.3e-06	TRUE	1	GATCACCTCCTTTCA	AGTGAGTTACGGAGGTTTCTTTGA	-8.64317
GCF_006742785.1	s__nitrosomonas stercoris	g__nitrosomonas	f__nitrosomonadaceae	o__burkholderiales	c__gammaproteobacteria	p__proteobacteria	d__bacteria	TRUE	TRUE	6.5e-07	TRUE	1	GATCACCTCCTTTCG	GAAGTATTACGGAGGTATCTTTGA	-8.64317
GCF_001007935.1	s__nitrosomonas communis	g__nitrosomonas	f__nitrosomonadaceae	o__burkholderiales	c__gammaproteobacteria	p__proteobacteria	d__bacteria	TRUE	TRUE	0.0052	TRUE	1	GATCACCTCCTTTCT	AAAGCATTGCGGAGGTATCTTTGA	-8.64317
GCF_000619905.2	s__nitrosospira briensis	g__nitrosospira	f__nitrosomonadaceae	o__burkholderiales	c__gammaproteobacteria	p__proteobacteria	d__bacteria	TRUE	TRUE	7.6e-06	TRUE	1	GATCACCTCCTTTCT	GCAGCATTGCGGAGGTATCTTTGA	-8.64317
GCF_000196355.1	s__nitrosospira multiformis	g__nitrosospira	f__nitrosomonadaceae	o__burkholderiales	c__gammaproteobacteria	p__proteobacteria	d__bacteria	TRUE	TRUE	1.6e-05	TRUE	1	GATCACCTCCTTTCT	GCAGAACTGCGGAGGTATCTTTGA	-8.64317
GCF_000355765.4	s__nitrosospira lacus	g__nitrosospira	f__nitrosomonadaceae	o__burkholderiales	c__gammaproteobacteria	p__proteobacteria	d__bacteria	TRUE	TRUE	0.00032	TRUE	1	GATCACCTCCTTTCT	GCAGAGTTGCGGAGGTATCTTTGA	-8.64317
GCF_013168275.1	s__nitrotoga sp013168275	g__nitrotoga	f__gallionellaceae	o__burkholderiales	c__gammaproteobacteria	p__proteobacteria	d__bacteria	TRUE	TRUE	7.4e-05	TRUE	1	GATCACCTCCTTTCT	ACTGAACTACGGAGGTATCTTTGA	-8.64317
GCF_007874125.1	s__noviherbaspirillum sp007874125	g__noviherbaspirillum	f__burkholderiaceae	o__burkholderiales	c__gammaproteobacteria	p__proteobacteria	d__bacteria	TRUE	TRUE	8.1e-06	TRUE	1	GATCACCTCCTTTCT	GCCGAATTACGGAGGTATCTTTGA	-8.64317
GCF_000019965.1	s__opitutus terrae	g__opitutus	f__opitutaceae	o__opitutales	c__verrucomicrobiae	p__verrucomicrobiota	d__bacteria	TRUE	TRUE	0.00013	TRUE	1	GATCACCTCCTTTCT	GGCCATCTATGGAGGTTTCTTTGA	-8.64317
GCF_900089455.2	s__orrella dioscoreae	g__orrella	f__burkholderiaceae	o__burkholderiales	c__gammaproteobacteria	p__proteobacteria	d__bacteria	TRUE	TRUE	0.00026	TRUE	1	GATCACCTCCTTTAA	CTGCAACTGCGGAGGTATCTTTGA	-8.64317
GCF_008274805.1	s__oryzomicrobium terrae	g__oryzomicrobium	f__rhodocyclaceae	o__burkholderiales	c__gammaproteobacteria	p__proteobacteria	d__bacteria	TRUE	TRUE	8.2e-07	TRUE	1	GATCACCTCCTTTCT	ACCGACCTACGGAGGTATCTTTGA	-8.64317
GCF_009756665.1	s__permianibacter aggregans	g__permianibacter	f__dsm-103792	o__enterobacterales	c__gammaproteobacteria	p__proteobacteria	d__bacteria	TRUE	TRUE	0.0003	TRUE	1	GATCACCTCCTTAAA	GAATCAATGCGGAGGTATCTTTGA	-8.64317
GCF_008119665.1	s__pigmentiphaga aceris	g__pigmentiphaga	f__burkholderiaceae	o__burkholderiales	c__gammaproteobacteria	p__proteobacteria	d__bacteria	TRUE	TRUE	1.4e-07	TRUE	1	GATCACCTCCTTTCA	ACCGAACTTCGGAGGTATCTTTGA	-8.64317
GCF_003854895.1	s__pigmentiphaga sp003854895	g__pigmentiphaga	f__burkholderiaceae	o__burkholderiales	c__gammaproteobacteria	p__proteobacteria	d__bacteria	TRUE	TRUE	6.6e-08	TRUE	1	GATCACCTCCTTTCA	CAGGATCTACGGAGGTATCTTTGA	-8.64317
GCA_001017435.1	s__polyangium_a brachysporum	g__polyangium_a	f__burkholderiaceae	o__burkholderiales	c__gammaproteobacteria	p__proteobacteria	d__bacteria	TRUE	TRUE	1.4e-06	TRUE	1	GATCACCTCCTTTCT	GCCGAGCTTCGGAGGTATCTTTGA	-8.64317
GCF_018687615.1	s__polynucleobacter sp018687615	g__polynucleobacter	f__burkholderiaceae	o__burkholderiales	c__gammaproteobacteria	p__proteobacteria	d__bacteria	TRUE	TRUE	7.4e-06	TRUE	1	GATCACCTCCTTTCT	ATTGAGCTTCGGAGGTATCTTTGA	-8.64317
GCF_018687515.1	s__polynucleobacter sp018687515	g__polynucleobacter	f__burkholderiaceae	o__burkholderiales	c__gammaproteobacteria	p__proteobacteria	d__bacteria	TRUE	TRUE	9.5e-06	TRUE	1	GATCACCTCCTTTCT	CTTGAACTACGGAGGTATCTTTGA	-8.64317
GCF_000011565.2	s__protochlamydia amoebophila	g__protochlamydia	f__parachlamydiaceae	o__chlamydiales	c__chlamydiia	p__chlamydiota	d__bacteria	TRUE	TRUE	7.4e-06	TRUE	1	GATCACCTCCTTTAA	CTTCACATGTGGAGGTATCTTTGA	-8.64317
GCF_001499655.1	s__protochlamydia naegleriophila	g__protochlamydia	f__parachlamydiaceae	o__chlamydiales	c__chlamydiia	p__chlamydiota	d__bacteria	TRUE	TRUE	9.3e-06	TRUE	1	GATCACCTCCTTTAA	CTTCACATGTGGAGGTATCTTTGA	-8.64317
GCF_003028855.1	s__pseudoduganella armeniaca	g__pseudoduganella	f__burkholderiaceae	o__burkholderiales	c__gammaproteobacteria	p__proteobacteria	d__bacteria	TRUE	TRUE	2.5e-06	TRUE	1	GATCACCTCCTTTCT	GCCGAACTTCGGAGGTATCTTTGA	-8.64317
GCF_004322755.1	s__pseudoduganella albidiflava	g__pseudoduganella	f__burkholderiaceae	o__burkholderiales	c__gammaproteobacteria	p__proteobacteria	d__bacteria	TRUE	TRUE	1.8e-05	TRUE	1	GATCACCTCCTTTCT	AACGAACTTCGGAGGTATCTTTGA	-8.64317
GCF_001191005.1	s__pseudoduganella sp001191005	g__pseudoduganella	f__burkholderiaceae	o__burkholderiales	c__gammaproteobacteria	p__proteobacteria	d__bacteria	TRUE	TRUE	4.3e-05	TRUE	1	GATCACCTCCTTTCT	GCCGAACTTCGGAGGTATCTTTGA	-8.64317
GCF_004421005.1	s__pseudoduganella plicata	g__pseudoduganella	f__burkholderiaceae	o__burkholderiales	c__gammaproteobacteria	p__proteobacteria	d__bacteria	TRUE	TRUE	2.5e-06	TRUE	1	GATCACCTCCTTTCT	GCCGAACTTCGGAGGTATCTTTGA	-8.64317
GCF_001606025.1	s__psychrobacter alimentarius_a	g__psychrobacter	f__moraxellaceae	o__pseudomonadales	c__gammaproteobacteria	p__proteobacteria	d__bacteria	TRUE	TRUE	3.9e-10	TRUE	1	GATCACCTCCTTATA	CAGGACTTGCGGAGGTATCTTTGA	-8.64317
GCF_001593285.1	s__psychrobacter sp001593285	g__psychrobacter	f__moraxellaceae	o__pseudomonadales	c__gammaproteobacteria	p__proteobacteria	d__bacteria	TRUE	TRUE	3.9e-10	TRUE	1	GATCACCTCCTTATA	CAGGACTTACGGAGGTATCTTTGA	-8.64317
GCF_014770435.1	s__psychrobacter sp014770435	g__psychrobacter	f__moraxellaceae	o__pseudomonadales	c__gammaproteobacteria	p__proteobacteria	d__bacteria	TRUE	TRUE	3.9e-10	TRUE	1	GATCACCTCCTTATA	CAGGACTTGCGGAGGTATCTTTGA	-8.64317
GCF_001298525.1	s__psychrobacter urativorans_a	g__psychrobacter	f__moraxellaceae	o__pseudomonadales	c__gammaproteobacteria	p__proteobacteria	d__bacteria	TRUE	TRUE	3.8e-10	TRUE	1	GATCACCTCCTTATA	CAGGACTTGCGGAGGTATCTTTGA	-8.64317
GCA_018448495.1	s__psychrobacter sp018448495	g__psychrobacter	f__moraxellaceae	o__pseudomonadales	c__gammaproteobacteria	p__proteobacteria	d__bacteria	TRUE	TRUE	3.8e-10	TRUE	1	GATCACCTCCTTATA	CAGGACTTGCGGAGGTATCTTTGA	-8.64317
GCF_900168255.1	s__psychrobacter sp900168255	g__psychrobacter	f__moraxellaceae	o__pseudomonadales	c__gammaproteobacteria	p__proteobacteria	d__bacteria	TRUE	TRUE	3.8e-10	TRUE	1	GATCACCTCCTTATA	CAGGACTTGCGGAGGTATCTTTGA	-8.64317
GCF_000012305.1	s__psychrobacter arcticus	g__psychrobacter	f__moraxellaceae	o__pseudomonadales	c__gammaproteobacteria	p__proteobacteria	d__bacteria	TRUE	TRUE	3.8e-10	TRUE	1	GATCACCTCCTTATA	CAGGACTTGCGGAGGTATCTTTGA	-8.64317
GCF_000013905.1	s__psychrobacter cryohalolentis	g__psychrobacter	f__moraxellaceae	o__pseudomonadales	c__gammaproteobacteria	p__proteobacteria	d__bacteria	TRUE	TRUE	3.8e-10	TRUE	1	GATCACCTCCTTATA	CAGGACTTGCGGAGGTATCTTTGA	-8.64317
GCF_003013695.1	s__pulveribacter suum	g__pulveribacter	f__burkholderiaceae	o__burkholderiales	c__gammaproteobacteria	p__proteobacteria	d__bacteria	TRUE	TRUE	6.6e-08	TRUE	1	GATCACCTCCTTTCT	CGCGAGTTACGGAGGTATCTTTGA	-8.64317
GCF_000209655.1	s__pusillimonas_c sp000209655	g__pusillimonas_c	f__burkholderiaceae	o__burkholderiales	c__gammaproteobacteria	p__proteobacteria	d__bacteria	TRUE	TRUE	2.6e-06	TRUE	1	GATCACCTCCTTTCA	GACTCCCTTCGGAGGTATCTTTGA	-8.64317
GCF_004022565.1	s__pusillimonas_d thiosulfatoxidans	g__pusillimonas_d	f__burkholderiaceae	o__burkholderiales	c__gammaproteobacteria	p__proteobacteria	d__bacteria	TRUE	TRUE	3.9e-06	TRUE	1	GATCACCTCCTTTCA	CAGGCACTTCGGAGGTACCTTTGA	-8.64317
GCF_003999715.1	s__ralstonia pseudosolanacearum	g__ralstonia	f__burkholderiaceae	o__burkholderiales	c__gammaproteobacteria	p__proteobacteria	d__bacteria	TRUE	TRUE	1.9e-08	TRUE	1	GATCACCTCCTTTAA	GACGACCTTCGGAGGTATCTTTGA	-8.64317
GCF_016743075.1	s__ralstonia syzygii	g__ralstonia	f__burkholderiaceae	o__burkholderiales	c__gammaproteobacteria	p__proteobacteria	d__bacteria	TRUE	TRUE	1.9e-08	TRUE	1	GATCACCTCCTTTAA	GACGACCTTCGGAGGTATCTTTGA	-8.64317
GCF_000215705.1	s__ramlibacter tataouinensis	g__ramlibacter	f__burkholderiaceae	o__burkholderiales	c__gammaproteobacteria	p__proteobacteria	d__bacteria	TRUE	TRUE	1.8e-07	TRUE	1	GATCACCTCCTTTCT	GAAGACCTACGGAGGTATCTTTGA	-8.64317
GCF_006970865.1	s__rhodoferax_a sediminis	g__rhodoferax_a	f__burkholderiaceae	o__burkholderiales	c__gammaproteobacteria	p__proteobacteria	d__bacteria	TRUE	TRUE	8.5e-09	TRUE	1	GATCACCTCCTTTCT	GAGGATTTACGGAGGTATCTTTGA	-8.64317
GCF_001955695.1	s__rhodoferax_b koreense	g__rhodoferax_b	f__burkholderiaceae	o__burkholderiales	c__gammaproteobacteria	p__proteobacteria	d__bacteria	TRUE	TRUE	6.8e-07	TRUE	1	GATCACCTCCTTTCT	GAAGATTTACGGAGGTATCTTTGA	-8.64317
GCF_000166055.1	s__rhodomicrobium vannielii	g__rhodomicrobium	f__rhodomicrobiaceae	o__rhizobiales	c__alphaproteobacteria	p__proteobacteria	d__bacteria	TRUE	TRUE	3.7e-07	TRUE	1	GATCACCTCCTTTCT	TCGCTCCTGCGGAGGTATCTTTGA	-8.64317
GCF_000008045.1	s__rickettsia typhi	g__rickettsia	f__rickettsiaceae	o__rickettsiales	c__alphaproteobacteria	p__proteobacteria	d__bacteria	TRUE	TRUE	1.2e-05	TRUE	1	GATTACCTCCTTAAA	GAACTAATTTGGAGGTCACTTTGA	-8.64317
GCF_000012385.1	s__rickettsia bellii	g__rickettsia	f__rickettsiaceae	o__rickettsiales	c__alphaproteobacteria	p__proteobacteria	d__bacteria	TRUE	TRUE	9e-07	TRUE	1	GATTACCTCCTTAAA	GAATTGCTTCGGAGGTCACTTTGA	-8.64317
GCF_000284075.1	s__rickettsia rhipicephali	g__rickettsia	f__rickettsiaceae	o__rickettsiales	c__alphaproteobacteria	p__proteobacteria	d__bacteria	TRUE	TRUE	8.8e-07	TRUE	1	GATTACCTCCTTAAA	GAACTACTTTGGAGGTCACTTTGA	-8.64317
GCF_002285905.1	s__rickettsia sp002285905	g__rickettsia	f__rickettsiaceae	o__rickettsiales	c__alphaproteobacteria	p__proteobacteria	d__bacteria	TRUE	TRUE	9e-07	TRUE	1	GATTACCTCCTTAAA	GAACTGCTTCGGAGGTCACTTTGA	-8.64317
GCF_001951015.1	s__rickettsia rickettsii	g__rickettsia	f__rickettsiaceae	o__rickettsiales	c__alphaproteobacteria	p__proteobacteria	d__bacteria	TRUE	TRUE	8.8e-07	TRUE	1	GATTACCTCCTTAAA	GAACTACTTTGGAGGTCACTTTGA	-8.64317
GCF_016743795.1	s__rickettsia tillamookensis	g__rickettsia	f__rickettsiaceae	o__rickettsiales	c__alphaproteobacteria	p__proteobacteria	d__bacteria	TRUE	TRUE	8.8e-07	TRUE	1	GATTACCTCCTTAAA	GAGCTACTTTGGAGGTCACTTTGA	-8.64317
GCF_000018205.1	s__rickettsia akari	g__rickettsia	f__rickettsiaceae	o__rickettsiales	c__alphaproteobacteria	p__proteobacteria	d__bacteria	TRUE	TRUE	8.8e-07	TRUE	1	GATTACCTCCTTAAA	GAACTACTTTGGAGGTCACTTTGA	-8.64317
GCF_000367405.1	s__rickettsia prowazekii	g__rickettsia	f__rickettsiaceae	o__rickettsiales	c__alphaproteobacteria	p__proteobacteria	d__bacteria	TRUE	TRUE	3.7e-07	TRUE	1	GATTACCTCCTTAAA	GACCTAATTTGGAGGTCACTTTGA	-8.64317
GCF_003966755.1	s__rickettsiella_b viridis	g__rickettsiella_b	f__diplorickettsiaceae	o__diplorickettsiales	c__gammaproteobacteria	p__proteobacteria	d__bacteria	TRUE	TRUE	6e-08	TRUE	1	GATCACCTCCTTATT	GTCGAATTACGGAGGTACCTTTGA	-8.64317
GCF_002002905.1	s__rivicola sp002002905	g__rivicola	f__aquaspirillaceae	o__burkholderiales	c__gammaproteobacteria	p__proteobacteria	d__bacteria	TRUE	TRUE	7.8e-07	TRUE	1	GATCACCTCCTTTCT	GACGAGATCCGGAGGTATCTTTGA	-8.64317
GCF_011044495.1	s__roseimicrobium sp011044495	g__roseimicrobium	f__verrucomicrobiaceae	o__verrucomicrobiales	c__verrucomicrobiae	p__verrucomicrobiota	d__bacteria	TRUE	TRUE	0.05	TRUE	1	GATCACCTCCTTTCT	GGAGCGCTCCGGAGGTATCTTTGA	-8.64317
GCF_000934545.1	s__rugosibacter aromaticivorans	g__rugosibacter	f__rhodocyclaceae	o__burkholderiales	c__gammaproteobacteria	p__proteobacteria	d__bacteria	TRUE	TRUE	2.5e-06	TRUE	1	GATCACCTCCTTTCT	CAGGAACTGCGGAGGTATCTTTGA	-8.64317
GCF_000507245.1	s__salinispira pacifica	g__salinispira	f__salinispiraceae	o__dsm-27196	c__spirochaetia	p__spirochaetota	d__bacteria	TRUE	TRUE	0.00058	TRUE	1	GATCACCTCCTTTCT	TATGACACATGGAGGTCTCTTTGA	-8.64317
GCF_015476235.1	s__schlegelella thermodepolymerans	g__schlegelella	f__burkholderiaceae	o__burkholderiales	c__gammaproteobacteria	p__proteobacteria	d__bacteria	TRUE	TRUE	3.3e-07	TRUE	1	GATCACCTCCTTTCT	GCCGAACTACGGAGGTATCTTTGA	-8.64317
GCF_000828915.1	s__serpentinomonas mccroryi	g__serpentinomonas	f__burkholderiaceae	o__burkholderiales	c__gammaproteobacteria	p__proteobacteria	d__bacteria	TRUE	TRUE	4.4e-05	TRUE	1	GATCACCTCCTTTCT	CTCGAGCTGCGGAGGTATCTTTGA	-8.64317
GCF_000828895.1	s__serpentinomonas raichei	g__serpentinomonas	f__burkholderiaceae	o__burkholderiales	c__gammaproteobacteria	p__proteobacteria	d__bacteria	TRUE	TRUE	3.1e-05	TRUE	1	GATCACCTCCTTTCT	CTCGAGCTGCGGAGGTATCTTTGA	-8.64317
GCF_000019525.1	s__shewanella woodyi	g__shewanella	f__shewanellaceae	o__enterobacterales	c__gammaproteobacteria	p__proteobacteria	d__bacteria	TRUE	TRUE	3.9e-07	TRUE	1	GATCACCTCCTTACC	CTTCTACTCCGGAGGTATCTTTGA	-8.64317
GCF_000018025.1	s__shewanella sediminis	g__shewanella	f__shewanellaceae	o__enterobacterales	c__gammaproteobacteria	p__proteobacteria	d__bacteria	TRUE	TRUE	4.5e-08	TRUE	1	GATCACCTCCTTACC	CTTCTACTCCGGAGGTATCTTTGA	-8.64317
GCF_000025705.1	s__sideroxydans lithotrophicus	g__sideroxydans	f__gallionellaceae	o__burkholderiales	c__gammaproteobacteria	p__proteobacteria	d__bacteria	TRUE	TRUE	1.4e-05	TRUE	1	GATCACCTCCTTTCT	AATGAGTTACGGAGGTTTCTTTGA	-8.64317
GCF_000237205.1	s__simkania negevensis	g__simkania	f__simkaniaceae	o__chlamydiales	c__chlamydiia	p__chlamydiota	d__bacteria	TRUE	TRUE	0.00087	TRUE	1	GATCACCTCCTTTAA	CTTCAAATGTGGAGGTTTCTTTGA	-8.64317
GCF_000600005.1	s__snodgrassella alvi	g__snodgrassella	f__neisseriaceae	o__burkholderiales	c__gammaproteobacteria	p__proteobacteria	d__bacteria	TRUE	TRUE	1.3e-05	TRUE	1	GATCACCTCCTTTCT	CACGATTTACGGAGGTATCTTTGA	-8.64317
GCF_000184345.1	s__spirochaeta_a thermophila	g__spirochaeta_a	f__spirochaetaceae_a	o__spirochaetales_a	c__spirochaetia	p__spirochaetota	d__bacteria	TRUE	TRUE	1.5e-06	TRUE	1	GATCACCTCCTTTCT	AAAGAAACCTGGAGGTATCTTTGA	-8.64317
GCF_000147075.1	s__spirochaeta_a thermophila_a	g__spirochaeta_a	f__spirochaetaceae_a	o__spirochaetales_a	c__spirochaetia	p__spirochaetota	d__bacteria	TRUE	TRUE	1.5e-06	TRUE	1	GATCACCTCCTTTCT	AAAGAAACCTGGAGGTATCTTTGA	-8.64317
GCF_006739205.1	s__streptococcus mutans	g__streptococcus	f__streptococcaceae	o__lactobacillales	c__bacilli	p__firmicutes	d__bacteria	TRUE	TRUE	3.7e-07	TRUE	1	GATCACCTCCTTTCT	ACTAGCTTTCGGAGGTCTCTTTGA	-8.64317
GCF_002355215.1	s__streptococcus troglodytae	g__streptococcus	f__streptococcaceae	o__lactobacillales	c__bacilli	p__firmicutes	d__bacteria	TRUE	TRUE	1.1e-07	TRUE	1	GATCACCTCCTTTCT	ACTAGCTTTCGGAGGTCTCTTTGA	-8.64317
GCF_000297055.2	s__sulfuricella denitrificans	g__sulfuricella	f__sulfuricellaceae	o__burkholderiales	c__gammaproteobacteria	p__proteobacteria	d__bacteria	TRUE	TRUE	4.4e-06	TRUE	1	GATCACCTCCTTTCT	ACTGACCTGCGGAGGTATCTTTGA	-8.64317
GCF_009937995.1	s__sulfuriferula_a nivalis	g__sulfuriferula_a	f__sulfuriferulaceae	o__burkholderiales	c__gammaproteobacteria	p__proteobacteria	d__bacteria	TRUE	TRUE	1.7e-05	TRUE	1	GATCACCTCCTTTCT	GTTGAACTTCGGAGGTATCTTTGA	-8.64317
GCF_002162035.1	s__sulfuriferula_a sp002162035	g__sulfuriferula_a	f__sulfuriferulaceae	o__burkholderiales	c__gammaproteobacteria	p__proteobacteria	d__bacteria	TRUE	TRUE	1.8e-06	TRUE	1	GATCACCTCCTTTCT	GTAGAACTTCGGAGGTATCTTTGA	-8.64317
GCF_000828635.1	s__sulfuritalea hydrogenivorans	g__sulfuritalea	f__rhodocyclaceae	o__burkholderiales	c__gammaproteobacteria	p__proteobacteria	d__bacteria	TRUE	TRUE	2.8e-07	TRUE	1	GATCACCTCCTTTCT	GAGCAACTGCGGAGGTATCTTTGA	-8.64317
GCF_006337085.1	s__sutterella faecalis	g__sutterella	f__burkholderiaceae	o__burkholderiales	c__gammaproteobacteria	p__proteobacteria	d__bacteria	TRUE	TRUE	5.5e-07	TRUE	1	GATCACCTCCTTTAA	GCTGAACTTCGGAGGTATCTTTGA	-8.64317
GCF_001051995.2	s__thauera humireducens	g__thauera	f__rhodocyclaceae	o__burkholderiales	c__gammaproteobacteria	p__proteobacteria	d__bacteria	TRUE	TRUE	2.8e-06	TRUE	1	GATCACCTCCTTTCA	CGGGAACTCCGGAGGTATCTTTGA	-8.64317
GCF_001922305.1	s__thauera chlorobenzoica	g__thauera	f__rhodocyclaceae	o__burkholderiales	c__gammaproteobacteria	p__proteobacteria	d__bacteria	TRUE	TRUE	2.8e-06	TRUE	1	GATCACCTCCTTTCA	CGCGAACTACGGAGGTATCTTTGA	-8.64317
GCF_003030465.1	s__thauera aromatica	g__thauera	f__rhodocyclaceae	o__burkholderiales	c__gammaproteobacteria	p__proteobacteria	d__bacteria	TRUE	TRUE	2.8e-06	TRUE	1	GATCACCTCCTTTCA	CGCGAACTACGGAGGTATCTTTGA	-8.64317
GCF_002354895.1	s__thauera sp002354895	g__thauera	f__rhodocyclaceae	o__burkholderiales	c__gammaproteobacteria	p__proteobacteria	d__bacteria	TRUE	TRUE	3.1e-06	TRUE	1	GATCACCTCCTTTCA	CGCGAACTACGGAGGTATCTTTGA	-8.64317
GCF_003345255.1	s__thauera_a hydrothermalis	g__thauera_a	f__rhodocyclaceae	o__burkholderiales	c__gammaproteobacteria	p__proteobacteria	d__bacteria	TRUE	TRUE	1.6e-06	TRUE	1	GATCACCTCCTTTCA	CGCGAGCTGCGGAGGTATCTTTGA	-8.64317
GCF_000020385.1	s__trichlorobacter lovleyi	g__trichlorobacter	f__pseudopelobacteraceae	o__geobacterales	c__desulfuromonadia	p__desulfobacterota	d__bacteria	TRUE	TRUE	4.6e-06	TRUE	1	GATCACCTCCTTTCT	TCCTCACTTCGGAGGTCTCTTTGA	-8.64317
GCF_009937975.1	s__undibacterium sp009937975	g__undibacterium	f__burkholderiaceae	o__burkholderiales	c__gammaproteobacteria	p__proteobacteria	d__bacteria	TRUE	TRUE	0.0011	TRUE	1	GATCACCTCCTTTCT	GCCGAACTCCGGAGGTATCTTTGA	-8.64317
GCF_003955735.1	s__undibacterium parvum	g__undibacterium	f__burkholderiaceae	o__burkholderiales	c__gammaproteobacteria	p__proteobacteria	d__bacteria	TRUE	TRUE	0.00049	TRUE	1	GATCACCTCCTTTCT	GCCGAACTTCGGAGGTATCTTTGA	-8.64317
GCF_009937955.1	s__undibacterium sp009937955	g__undibacterium	f__burkholderiaceae	o__burkholderiales	c__gammaproteobacteria	p__proteobacteria	d__bacteria	TRUE	TRUE	0.0011	TRUE	1	GATCACCTCCTTTCT	GCCGAACTCCGGAGGTATCTTTGA	-8.64317
GCF_013003965.1	s__usitatibacter rugosus	g__usitatibacter	f__usitatibacteraceae	o__burkholderiales	c__gammaproteobacteria	p__proteobacteria	d__bacteria	TRUE	TRUE	3.4e-07	TRUE	1	GATCACCTCCTTTCT	GCCGAGCTCCGGAGGTATCTTTGA	-8.64317
GCF_013003985.1	s__usitatibacter palustris	g__usitatibacter	f__usitatibacteraceae	o__burkholderiales	c__gammaproteobacteria	p__proteobacteria	d__bacteria	TRUE	TRUE	4.4e-07	TRUE	1	GATCACCTCCTTTCT	GCTGAGCTCCGGAGGTACCTTTGA	-8.64317
GCF_014302995.1	s__variovorax sp014302995	g__variovorax	f__burkholderiaceae	o__burkholderiales	c__gammaproteobacteria	p__proteobacteria	d__bacteria	TRUE	TRUE	0.00081	TRUE	1	GATCACCTCCTTTCT	GTCGATTTACGGAGGTATCTTTGA	-8.64317
GCF_003019815.1	s__variovorax sp003019815	g__variovorax	f__burkholderiaceae	o__burkholderiales	c__gammaproteobacteria	p__proteobacteria	d__bacteria	TRUE	TRUE	3.5e-05	TRUE	1	GATCACCTCCTTTCT	GTCGATTTACGGAGGTATCTTTGA	-8.64317
GCF_014303735.1	s__variovorax sp014303735	g__variovorax	f__burkholderiaceae	o__burkholderiales	c__gammaproteobacteria	p__proteobacteria	d__bacteria	TRUE	TRUE	5.7e-05	TRUE	1	GATCACCTCCTTTCT	GTCGATTTACGGAGGTATCTTTGA	-8.64317
GCF_017161115.1	s__variovorax sp017161115	g__variovorax	f__burkholderiaceae	o__burkholderiales	c__gammaproteobacteria	p__proteobacteria	d__bacteria	TRUE	TRUE	3.5e-05	TRUE	1	GATCACCTCCTTTCT	GTCGATTTACGGAGGTATCTTTGA	-8.64317
GCF_001577265.1	s__variovorax sp001577265	g__variovorax	f__burkholderiaceae	o__burkholderiales	c__gammaproteobacteria	p__proteobacteria	d__bacteria	TRUE	TRUE	3.9e-05	TRUE	1	GATCACCTCCTTTCT	GTCGATTTACGGAGGTATCTTTGA	-8.64317
GCF_000463015.1	s__variovorax paradoxus_e	g__variovorax	f__burkholderiaceae	o__burkholderiales	c__gammaproteobacteria	p__proteobacteria	d__bacteria	TRUE	TRUE	3.7e-07	TRUE	1	GATCACCTCCTTTCT	GCGGATTTACGGAGGTATCTTTGA	-8.64317
GCF_901827185.1	s__variovorax sp901827185	g__variovorax	f__burkholderiaceae	o__burkholderiales	c__gammaproteobacteria	p__proteobacteria	d__bacteria	TRUE	TRUE	4e-06	TRUE	1	GATCACCTCCTTTCT	GTCGATTTACGGAGGTATCTTTGA	-8.64317
GCF_901827205.1	s__variovorax sp901827205	g__variovorax	f__burkholderiaceae	o__burkholderiales	c__gammaproteobacteria	p__proteobacteria	d__bacteria	TRUE	TRUE	3.7e-07	TRUE	1	GATCACCTCCTTTCT	GCCGACCTACGGAGGTATCTTTGA	-8.64317
GCF_000184745.1	s__variovorax paradoxus_c	g__variovorax	f__burkholderiaceae	o__burkholderiales	c__gammaproteobacteria	p__proteobacteria	d__bacteria	TRUE	TRUE	0.00081	TRUE	1	GATCACCTCCTTTCT	GTCGATTTACGGAGGTATCTTTGA	-8.64317
GCF_901827155.1	s__variovorax sp901827155	g__variovorax	f__burkholderiaceae	o__burkholderiales	c__gammaproteobacteria	p__proteobacteria	d__bacteria	TRUE	TRUE	6e-06	TRUE	1	GATCACCTCCTTTCT	GTCGATCTACGGAGGTATCTTTGA	-8.64317
GCF_901827175.1	s__variovorax sp901827175	g__variovorax	f__burkholderiaceae	o__burkholderiales	c__gammaproteobacteria	p__proteobacteria	d__bacteria	TRUE	TRUE	3.7e-07	TRUE	1	GATCACCTCCTTTCT	GCCGACCTACGGAGGTATCTTTGA	-8.64317
GCF_009755665.1	s__variovorax paradoxus_g	g__variovorax	f__burkholderiaceae	o__burkholderiales	c__gammaproteobacteria	p__proteobacteria	d__bacteria	TRUE	TRUE	3.7e-07	TRUE	1	GATCACCTCCTTTCT	GCCGATTTACGGAGGTATCTTTGA	-8.64317
GCF_009498455.1	s__variovorax paradoxus_h	g__variovorax	f__burkholderiaceae	o__burkholderiales	c__gammaproteobacteria	p__proteobacteria	d__bacteria	TRUE	TRUE	0.00051	TRUE	1	GATCACCTCCTTTCT	GTCGATTTACGGAGGTATCTTTGA	-8.64317
GCF_000092785.1	s__waddlia chondrophila	g__waddlia	f__waddliaceae	o__chlamydiales	c__chlamydiia	p__chlamydiota	d__bacteria	TRUE	TRUE	0.0014	TRUE	1	GATCACCTCCTTTAA	CTTCATATGTGGAGGTATCTTTGA	-8.64317
GCF_001318295.1	s__xiphinematobacter sp001318295	g__xiphinematobacter	f__xiphinematobacteraceae	o__chthoniobacterales	c__verrucomicrobiae	p__verrucomicrobiota	d__bacteria	TRUE	TRUE	0.073	TRUE	1	GATCACCTCCTTTCT	GCCGAGCTGTGGAGGTCTCTTTGA	-8.64317
GCF_003606325.2	s__bartonella kosoyi	g__bartonella	f__rhizobiaceae_a	o__rhizobiales_a	c__alphaproteobacteria	p__proteobacteria	d__bacteria	TRUE	TRUE	6.1e-07	TRUE	1	GATCACCTCCTTTCT	CAGTTGCTAAGGGGGCATCTTTGA	-8.62051
GCF_000341355.1	s__bartonella australis	g__bartonella	f__rhizobiaceae_a	o__rhizobiales_a	c__alphaproteobacteria	p__proteobacteria	d__bacteria	TRUE	TRUE	2.4e-06	TRUE	1	GATCACCTCCTTTCT	AAGTTGCTAAGGGGGCATCTTTGA	-8.62051
GCF_000046705.1	s__bartonella henselae	g__bartonella	f__rhizobiaceae_a	o__rhizobiales_a	c__alphaproteobacteria	p__proteobacteria	d__bacteria	TRUE	TRUE	7e-07	TRUE	1	GATCACCTCCTTTCT	AAGTTGCTAAGGGGGCATCTTTGA	-8.62051
GCF_003606345.3	s__bartonella krasnovii	g__bartonella	f__rhizobiaceae_a	o__rhizobiales_a	c__alphaproteobacteria	p__proteobacteria	d__bacteria	TRUE	TRUE	2.8e-07	TRUE	1	GATCACCTCCTTTCT	CAGTTGCTAAGGGGGCATCTTTGA	-8.62051
GCF_009936175.1	s__bartonella quintana	g__bartonella	f__rhizobiaceae_a	o__rhizobiales_a	c__alphaproteobacteria	p__proteobacteria	d__bacteria	TRUE	TRUE	1.1e-06	TRUE	1	GATCACCTCCTTTCT	AAGTTGCTAAGGGGGCATCTTTAA	-8.62051
GCF_013388295.1	s__bartonella alsatica	g__bartonella	f__rhizobiaceae_a	o__rhizobiales_a	c__alphaproteobacteria	p__proteobacteria	d__bacteria	TRUE	TRUE	1.1e-06	TRUE	1	GATCACCTCCTTTCT	AAGTTGCTAAGGGGGCATCTTTAA	-8.62051
GCF_000196435.1	s__bartonella tribocorum	g__bartonella	f__rhizobiaceae_a	o__rhizobiales_a	c__alphaproteobacteria	p__proteobacteria	d__bacteria	TRUE	TRUE	6.1e-07	TRUE	1	GATCACCTCCTTTCT	CAATTGCTAAGGGGGCATCTTTGA	-8.62051
GCF_001189295.1	s__chondromyces crocatus	g__chondromyces	f__polyangiaceae	o__polyangiales	c__polyangia	p__myxococcota	d__bacteria	TRUE	TRUE	1.1e-06	TRUE	1	GATCACCTCCTTTCT	GATGCGCTAAGGGGGCATCTTTGA	-8.62051
GCF_001263205.1	s__labilithrix luteola	g__labilithrix	f__polyangiaceae	o__polyangiales	c__polyangia	p__myxococcota	d__bacteria	TRUE	TRUE	9.2e-07	TRUE	1	GATCACCTCCTTTCT	ATGGCGCTAAGGGGGCATCTTTGA	-8.62051
GCF_000418325.1	s__sorangium cellulosum_d	g__sorangium	f__polyangiaceae	o__polyangiales	c__polyangia	p__myxococcota	d__bacteria	TRUE	TRUE	1.2e-06	TRUE	1	GATCACCTCCTTTCT	GAGGCGCTAAGGGGGCATCTTTGA	-8.62051
GCF_004135735.1	s__sorangium cellulosum_f	g__sorangium	f__polyangiaceae	o__polyangiales	c__polyangia	p__myxococcota	d__bacteria	TRUE	TRUE	1.2e-06	TRUE	1	GATCACCTCCTTTCT	GAGGCGCTAAGGGGGCATCTTTGA	-8.62051
GCF_000067165.1	s__sorangium cellulosum_b	g__sorangium	f__polyangiaceae	o__polyangiales	c__polyangia	p__myxococcota	d__bacteria	TRUE	TRUE	1.2e-06	TRUE	1	GATCACCTCCTTTCT	GAGGCGCTAAGGGGGCATCTTTGA	-8.62051
GCF_002950945.1	s__sorangium cellulosum_e	g__sorangium	f__polyangiaceae	o__polyangiales	c__polyangia	p__myxococcota	d__bacteria	TRUE	TRUE	1.2e-06	TRUE	1	GATCACCTCCTTTCT	GAGGCGCTAAGGGGGCATCTTTGA	-8.62051
GCF_005377625.1	s__desulfoglaeba alkanexedens	g__desulfoglaeba	f__dsm-9756	o__syntrophobacterales	c__syntrophobacteria	p__desulfobacterota	d__bacteria	TRUE	TRUE	0.00014	TRUE	1	GATCACCTCCTTTCT	CAAACCTTGGGAGGCTATCTTTGA	-8.51577
GCA_007993755.1	s__v1718 sp007993755	g__v1718	f__bradymonadaceae	o__bradymonadales	c__bradymonadia	p__myxococcota	d__bacteria	TRUE	TRUE	9.6e-06	TRUE	1	GATCACCTCCTTTAC	GCCGAGCTCGGGAGGCATCTTTGA	-8.51577
GCF_003966695.1	s__asticcacaulis excentricus_a	g__asticcacaulis	f__caulobacteraceae	o__caulobacterales	c__alphaproteobacteria	p__proteobacteria	d__bacteria	TRUE	TRUE	0.0016	TRUE	1	GATCACCTCCTTTCT	GGATTGCTCAGGAGGCGTCTTTGA	-8.46753
GCF_000175215.2	s__asticcacaulis excentricus	g__asticcacaulis	f__caulobacteraceae	o__caulobacterales	c__alphaproteobacteria	p__proteobacteria	d__bacteria	TRUE	TRUE	0.0016	TRUE	1	GATCACCTCCTTTCT	GGATTGCTCAGGAGGCGTCTTTGA	-8.46753
GCF_018135625.1	s__bog-935 sp018135625	g__bog-935	f__caulobacteraceae	o__caulobacterales	c__alphaproteobacteria	p__proteobacteria	d__bacteria	TRUE	TRUE	0.00031	TRUE	1	GATCACCTCCTTTCT	GGACTGCTCAGGAGGCGTCTTTGA	-8.46753
GCF_011064825.1	s__brevundimonas mediterranea_a	g__brevundimonas	f__caulobacteraceae	o__caulobacterales	c__alphaproteobacteria	p__proteobacteria	d__bacteria	TRUE	TRUE	0.0038	TRUE	1	GATCACCTCCTTTCT	GCTCTGCTCAGGAGGCGTCTTTGA	-8.46753
GCF_016656965.1	s__brevundimonas sp016656965	g__brevundimonas	f__caulobacteraceae	o__caulobacterales	c__alphaproteobacteria	p__proteobacteria	d__bacteria	TRUE	TRUE	0.0038	TRUE	1	GATCACCTCCTTTCT	GCTCTGCTCAGGAGGCGTCTTTGA	-8.46753
GCF_000635915.2	s__brevundimonas naejangsanensis_a	g__brevundimonas	f__caulobacteraceae	o__caulobacterales	c__alphaproteobacteria	p__proteobacteria	d__bacteria	TRUE	TRUE	0.0039	TRUE	1	GATCACCTCCTTTCT	GCTCTGCTCAGGAGGCGACTTTGA	-8.46753
GCF_017086445.1	s__brevundimonas vesicularis_a	g__brevundimonas	f__caulobacteraceae	o__caulobacterales	c__alphaproteobacteria	p__proteobacteria	d__bacteria	TRUE	TRUE	0.0038	TRUE	1	GATCACCTCCTTTCT	GCTCTGCTCAGGAGGCGTCTTTGA	-8.46753
GCF_017487345.1	s__brevundimonas sp017487345	g__brevundimonas	f__caulobacteraceae	o__caulobacterales	c__alphaproteobacteria	p__proteobacteria	d__bacteria	TRUE	TRUE	0.0038	TRUE	1	GATCACCTCCTTTCT	GCTCTGCTCAGGAGGCGTCTTTGA	-8.46753
GCF_005484585.1	s__brevundimonas sp005484585	g__brevundimonas	f__caulobacteraceae	o__caulobacterales	c__alphaproteobacteria	p__proteobacteria	d__bacteria	TRUE	TRUE	0.0038	TRUE	1	GATCACCTCCTTTCT	GCTCTGCTCAGGAGGCGTCTTTGA	-8.46753
GCF_003627995.1	s__brevundimonas naejangsanensis_b	g__brevundimonas	f__caulobacteraceae	o__caulobacterales	c__alphaproteobacteria	p__proteobacteria	d__bacteria	TRUE	TRUE	0.0038	TRUE	1	GATCACCTCCTTTCT	GCTCTGCTCAGGAGGCGACTTTGA	-8.46753
GCF_000144605.1	s__brevundimonas subvibrioides	g__brevundimonas	f__caulobacteraceae	o__caulobacterales	c__alphaproteobacteria	p__proteobacteria	d__bacteria	TRUE	TRUE	0.0038	TRUE	1	GATCACCTCCTTTCT	GCTCTGCTCAGGAGGCGTCTTTGA	-8.46753
GCF_004683885.1	s__brevundimonas sp004683885	g__brevundimonas	f__caulobacteraceae	o__caulobacterales	c__alphaproteobacteria	p__proteobacteria	d__bacteria	TRUE	TRUE	0.0038	TRUE	1	GATCACCTCCTTTCT	GCTCTGCTCAGGAGGCGTCTTTGA	-8.46753
GCF_017487405.1	s__brevundimonas sp017487405	g__brevundimonas	f__caulobacteraceae	o__caulobacterales	c__alphaproteobacteria	p__proteobacteria	d__bacteria	TRUE	TRUE	0.0038	TRUE	1	GATCACCTCCTTTCT	GCTCTGCTCAGGAGGCGTCTTTGA	-8.46753
GCF_002002865.1	s__brevundimonas sp002002865	g__brevundimonas	f__caulobacteraceae	o__caulobacterales	c__alphaproteobacteria	p__proteobacteria	d__bacteria	TRUE	TRUE	0.0038	TRUE	1	GATCACCTCCTTTCT	GCTCTGCTCAGGAGGCGTCTTTGA	-8.46753
GCF_006547065.1	s__brevundimonas sp006547065	g__brevundimonas	f__caulobacteraceae	o__caulobacterales	c__alphaproteobacteria	p__proteobacteria	d__bacteria	TRUE	TRUE	0.0025	TRUE	1	GATCACCTCCTTTCT	GCTCTGCTCAGGAGGCGTCTTTGA	-8.46753
GCF_017795885.1	s__brevundimonas sp017795885	g__brevundimonas	f__caulobacteraceae	o__caulobacterales	c__alphaproteobacteria	p__proteobacteria	d__bacteria	TRUE	TRUE	0.0038	TRUE	1	GATCACCTCCTTTCT	GCTCTGCTCAGGAGGCGTCTTTGA	-8.46753
GCF_002749615.1	s__caulobacter mirabilis	g__caulobacter	f__caulobacteraceae	o__caulobacterales	c__alphaproteobacteria	p__proteobacteria	d__bacteria	TRUE	TRUE	0.0023	TRUE	1	GATCACCTCCTTTCT	GGACTGCTCAGGAGGCGACTTTGA	-8.46753
GCF_002742645.2	s__caulobacter sp002742645	g__caulobacter	f__caulobacteraceae	o__caulobacterales	c__alphaproteobacteria	p__proteobacteria	d__bacteria	TRUE	TRUE	0.00025	TRUE	1	GATCACCTCCTTTCT	GGACTGCTCAGGAGGCGTCTTTGA	-8.46753
GCF_001414055.1	s__caulobacter henricii	g__caulobacter	f__caulobacteraceae	o__caulobacterales	c__alphaproteobacteria	p__proteobacteria	d__bacteria	TRUE	TRUE	0.00025	TRUE	1	GATCACCTCCTTTCT	GGACTGCTCAGGAGGCGTCTTTGA	-8.46753
GCF_010977555.1	s__caulobacter rhizosphaerae	g__caulobacter	f__caulobacteraceae	o__caulobacterales	c__alphaproteobacteria	p__proteobacteria	d__bacteria	TRUE	TRUE	0.00025	TRUE	1	GATCACCTCCTTTCT	GGACTGCTCAGGAGGCGTCTTTGA	-8.46753
GCF_003722335.1	s__caulobacter flavus	g__caulobacter	f__caulobacteraceae	o__caulobacterales	c__alphaproteobacteria	p__proteobacteria	d__bacteria	TRUE	TRUE	0.00025	TRUE	1	GATCACCTCCTTTCT	GGACTGCTCAGGAGGCGTCTTTGA	-8.46753
GCF_000092285.1	s__caulobacter segnis	g__caulobacter	f__caulobacteraceae	o__caulobacterales	c__alphaproteobacteria	p__proteobacteria	d__bacteria	TRUE	TRUE	0.00025	TRUE	1	GATCACCTCCTTTCT	GGACTGCTCAGGAGGCGTCTTTGA	-8.46753
GCF_002310375.3	s__caulobacter vibrioides_d	g__caulobacter	f__caulobacteraceae	o__caulobacterales	c__alphaproteobacteria	p__proteobacteria	d__bacteria	TRUE	TRUE	0.00025	TRUE	1	GATCACCTCCTTTCT	GGACTGCTCAGGAGGCGTCTTTGA	-8.46753
GCF_007990525.1	s__leptotrichia hofstadii	g__leptotrichia	f__leptotrichiaceae	o__fusobacteriales	c__fusobacteriia	p__fusobacteriota	d__bacteria	TRUE	TRUE	0.0034	TRUE	1	GATCACCTCCTTTCT	GAAGAAATCAGGAGGCATCTTTGA	-8.46753
GCF_007990545.2	s__leptotrichia wadei	g__leptotrichia	f__leptotrichiaceae	o__fusobacteriales	c__fusobacteriia	p__fusobacteriota	d__bacteria	TRUE	TRUE	0.0063	TRUE	1	GATCACCTCCTTTCT	GAAGAAATCAGGAGGCATCTTTGA	-8.46753
GCF_007990445.1	s__leptotrichia wadei_a	g__leptotrichia	f__leptotrichiaceae	o__fusobacteriales	c__fusobacteriia	p__fusobacteriota	d__bacteria	TRUE	TRUE	0.0024	TRUE	1	GATCACCTCCTTTCT	GAAGAAATCAGGAGGCATCTTTGA	-8.46753
GCF_001553645.1	s__leptotrichia sp001553645	g__leptotrichia	f__leptotrichiaceae	o__fusobacteriales	c__fusobacteriia	p__fusobacteriota	d__bacteria	TRUE	TRUE	0.0047	TRUE	1	GATCACCTCCTTTCT	GAAGAAATCAGGAGGCATCTTTGA	-8.46753
GCF_008327825.1	s__leptotrichia shahii	g__leptotrichia	f__leptotrichiaceae	o__fusobacteriales	c__fusobacteriia	p__fusobacteriota	d__bacteria	TRUE	TRUE	0.0024	TRUE	1	GATCACCTCCTTTCT	GAAGAAATCAGGAGGCATCTTTGA	-8.46753
GCF_018128225.1	s__leptotrichia sp018128225	g__leptotrichia	f__leptotrichiaceae	o__fusobacteriales	c__fusobacteriia	p__fusobacteriota	d__bacteria	TRUE	TRUE	0.0047	TRUE	1	GATCACCTCCTTTCT	GAAGAAATCAGGAGGCATCTTTGA	-8.46753
GCF_000023905.1	s__leptotrichia buccalis	g__leptotrichia	f__leptotrichiaceae	o__fusobacteriales	c__fusobacteriia	p__fusobacteriota	d__bacteria	TRUE	TRUE	0.0034	TRUE	1	GATCACCTCCTTTCT	GAAGAAATTAGGAGGCATCTTTGA	-8.46753
GCF_001274535.1	s__leptotrichia_a sp001274535	g__leptotrichia_a	f__leptotrichiaceae	o__fusobacteriales	c__fusobacteriia	p__fusobacteriota	d__bacteria	TRUE	TRUE	0.0011	TRUE	1	GATCACCTCCTTTCT	GAGGAAATCAGGAGGCACCTTTGA	-8.46753
GCF_009856525.1	s__neorickettsia findlayensis	g__neorickettsia	f__anaplasmataceae	o__rickettsiales	c__alphaproteobacteria	p__proteobacteria	d__bacteria	TRUE	TRUE	0.0089	TRUE	1	GATTACCTCCTTTTA	GAGGTAATCAGGAGGCAGCTTTGA	-8.46753
GCF_000013165.1	s__neorickettsia sennetsu	g__neorickettsia	f__anaplasmataceae	o__rickettsiales	c__alphaproteobacteria	p__proteobacteria	d__bacteria	TRUE	TRUE	0.0089	TRUE	1	GATTACCTCCTTTTA	GAAGTAATCAGGAGGCAGCTTTGA	-8.46753
GCF_000022525.1	s__neorickettsia risticii	g__neorickettsia	f__anaplasmataceae	o__rickettsiales	c__alphaproteobacteria	p__proteobacteria	d__bacteria	TRUE	TRUE	0.0041	TRUE	1	GATTACCTCCTTTTA	GAAGTAATCAGGAGGCAACTTTGA	-8.46753
GCF_000017265.1	s__phenylobacterium zucineum	g__phenylobacterium	f__caulobacteraceae	o__caulobacterales	c__alphaproteobacteria	p__proteobacteria	d__bacteria	TRUE	TRUE	0.00093	TRUE	1	GATCACCTCCTTTCT	GAACTGCTCAGGAGGCGTCTTTGA	-8.46753
GCF_003150835.1	s__phenylobacterium parvum	g__phenylobacterium	f__caulobacteraceae	o__caulobacterales	c__alphaproteobacteria	p__proteobacteria	d__bacteria	TRUE	TRUE	0.001	TRUE	1	GATCACCTCCTTTCT	GCACTGCTCAGGAGGCGACTTTGA	-8.46753
GCF_007990505.1	s__pseudoleptotrichia goodfellowii	g__pseudoleptotrichia	f__leptotrichiaceae	o__fusobacteriales	c__fusobacteriia	p__fusobacteriota	d__bacteria	TRUE	TRUE	0.0018	TRUE	1	GATCACCTCCTTTCT	GAGGAAATCAGGAGGCATCTTTGA	-8.46753
GCA_016894345.1	s__26b sp016894345	g__26b	f__neisseriaceae	o__burkholderiales	c__gammaproteobacteria	p__proteobacteria	d__bacteria	TRUE	TRUE	4.4e-06	TRUE	1	GATCACCTCCTTTCT	ACCGACATTCGGGGGTATCTTTGA	-7.869
GCF_003184265.1	s__acidiferrobacter sp003184265	g__acidiferrobacter	f__acidiferrobacteraceae	o__acidiferrobacterales	c__gammaproteobacteria	p__proteobacteria	d__bacteria	TRUE	TRUE	1.2e-05	TRUE	1	GATCACCTCCTTTCA	GCCGCCCTTCGGGGGTATCTTTGA	-7.869
GCF_006757745.1	s__acinetobacter radioresistens	g__acinetobacter	f__moraxellaceae	o__pseudomonadales	c__gammaproteobacteria	p__proteobacteria	d__bacteria	TRUE	TRUE	7.6e-10	TRUE	1	GATCACCTCCTTAAC	CAGACTCTACGGGGGTATCTTTGA	-7.869
GCF_900520355.1	s__acinetobacter calcoaceticus_c	g__acinetobacter	f__moraxellaceae	o__pseudomonadales	c__gammaproteobacteria	p__proteobacteria	d__bacteria	TRUE	TRUE	9.3e-09	TRUE	1	GATCACCTCCTTAAC	CAAACACTACGGGGGTATCTTTGA	-7.869
GCF_011578285.1	s__acinetobacter lanii	g__acinetobacter	f__moraxellaceae	o__pseudomonadales	c__gammaproteobacteria	p__proteobacteria	d__bacteria	TRUE	TRUE	1.4e-06	TRUE	1	GATCACCTCCTTAAC	CAAACACTACGGGGGTATCTTTGA	-7.869
GCF_002165255.2	s__acinetobacter sp002165255	g__acinetobacter	f__moraxellaceae	o__pseudomonadales	c__gammaproteobacteria	p__proteobacteria	d__bacteria	TRUE	TRUE	4.3e-07	TRUE	1	GATCACCTCCTTAAC	CAAACACTACGGGGGTATCTTTGA	-7.869
GCF_016599715.1	s__acinetobacter sp002135245	g__acinetobacter	f__moraxellaceae	o__pseudomonadales	c__gammaproteobacteria	p__proteobacteria	d__bacteria	TRUE	TRUE	2.3e-07	TRUE	1	GATCACCTCCTTAAC	CTGACATTACGGGGGTATCTTTGA	-7.869
GCF_002688565.1	s__acinetobacter sp002688565	g__acinetobacter	f__moraxellaceae	o__pseudomonadales	c__gammaproteobacteria	p__proteobacteria	d__bacteria	TRUE	TRUE	3.5e-08	TRUE	1	GATCACCTCCTTAAC	CAAACACTACGGGGGTATCTTTGA	-7.869
GCF_002165305.2	s__acinetobacter sp002165305	g__acinetobacter	f__moraxellaceae	o__pseudomonadales	c__gammaproteobacteria	p__proteobacteria	d__bacteria	TRUE	TRUE	2.3e-07	TRUE	1	GATCACCTCCTTAAC	CTCACACTACGGGGGTATCTTTGA	-7.869
GCF_015602705.1	s__acinetobacter lwoffii_e	g__acinetobacter	f__moraxellaceae	o__pseudomonadales	c__gammaproteobacteria	p__proteobacteria	d__bacteria	TRUE	TRUE	2.5e-09	TRUE	1	GATCACCTCCTTAAC	CAAACACTACGGGGGTATCTTTGA	-7.869
GCF_009557235.1	s__acinetobacter wanghuae	g__acinetobacter	f__moraxellaceae	o__pseudomonadales	c__gammaproteobacteria	p__proteobacteria	d__bacteria	TRUE	TRUE	3.5e-08	TRUE	1	GATCACCTCCTTAAC	CAAACACTACGGGGGTATCTTTGA	-7.869
GCF_009884975.1	s__acinetobacter dispersus	g__acinetobacter	f__moraxellaceae	o__pseudomonadales	c__gammaproteobacteria	p__proteobacteria	d__bacteria	TRUE	TRUE	4.3e-07	TRUE	1	GATCACCTCCTTAAC	CAAACACTACGGGGGTATCTTTGA	-7.869
GCF_001696615.3	s__acinetobacter sp001696615	g__acinetobacter	f__moraxellaceae	o__pseudomonadales	c__gammaproteobacteria	p__proteobacteria	d__bacteria	TRUE	TRUE	3.2e-08	TRUE	1	GATCACCTCCTTAAC	CAGACATTACGGGGGTATCTTTGA	-7.869
GCF_011578045.1	s__acinetobacter shaoyimingii	g__acinetobacter	f__moraxellaceae	o__pseudomonadales	c__gammaproteobacteria	p__proteobacteria	d__bacteria	TRUE	TRUE	7e-08	TRUE	1	GATCACCTCCTTAAC	CAAACTTTACGGGGGTATCTTTGA	-7.869
GCF_001696605.3	s__acinetobacter wuhouensis	g__acinetobacter	f__moraxellaceae	o__pseudomonadales	c__gammaproteobacteria	p__proteobacteria	d__bacteria	TRUE	TRUE	3.2e-06	TRUE	1	GATCACCTCCTTAAC	CTAACACTACGGGGGTATCTTTGA	-7.869
GCF_008630915.1	s__acinetobacter sp008630915	g__acinetobacter	f__moraxellaceae	o__pseudomonadales	c__gammaproteobacteria	p__proteobacteria	d__bacteria	TRUE	TRUE	4.3e-07	TRUE	1	GATCACCTCCTTAAC	CAAACACTACGGGGGTATCTTTGA	-7.869
GCF_001307195.1	s__acinetobacter equi	g__acinetobacter	f__moraxellaceae	o__pseudomonadales	c__gammaproteobacteria	p__proteobacteria	d__bacteria	TRUE	TRUE	2.3e-07	TRUE	1	GATCACCTCCTTAAC	CTAACATTACGGGGGTATCTTTGA	-7.869
GCF_009759685.1	s__acinetobacter baumannii	g__acinetobacter	f__moraxellaceae	o__pseudomonadales	c__gammaproteobacteria	p__proteobacteria	d__bacteria	TRUE	TRUE	9.3e-09	TRUE	1	GATCACCTCCTTAAC	CAAACACTACGGGGGTATCTTTGA	-7.869
GCF_001647675.1	s__acinetobacter sp001647675	g__acinetobacter	f__moraxellaceae	o__pseudomonadales	c__gammaproteobacteria	p__proteobacteria	d__bacteria	TRUE	TRUE	3.7e-08	TRUE	1	GATCACCTCCTTAAC	CAAACCTTACGGGGGTATCTTTGA	-7.869
GCF_003024525.3	s__acinetobacter cumulans	g__acinetobacter	f__moraxellaceae	o__pseudomonadales	c__gammaproteobacteria	p__proteobacteria	d__bacteria	TRUE	TRUE	3.5e-08	TRUE	1	GATCACCTCCTTAAC	CAAACGCTACGGGGGTATCTTTGA	-7.869
GCF_002165375.2	s__acinetobacter chinensis	g__acinetobacter	f__moraxellaceae	o__pseudomonadales	c__gammaproteobacteria	p__proteobacteria	d__bacteria	TRUE	TRUE	2.1e-08	TRUE	1	GATCACCTCCTTAAC	CAGACATTACGGGGGTATCTTTGA	-7.869
GCF_001612555.1	s__acinetobacter sp001612555	g__acinetobacter	f__moraxellaceae	o__pseudomonadales	c__gammaproteobacteria	p__proteobacteria	d__bacteria	TRUE	TRUE	2e-06	TRUE	1	GATCACCTCCTTAAC	CAAACATTACGGGGGTATCTTTGA	-7.869
GCF_000196795.1	s__acinetobacter oleivorans	g__acinetobacter	f__moraxellaceae	o__pseudomonadales	c__gammaproteobacteria	p__proteobacteria	d__bacteria	TRUE	TRUE	9.3e-09	TRUE	1	GATCACCTCCTTAAC	CAAACACTACGGGGGTATCTTTGA	-7.869
GCF_013343215.1	s__acinetobacter lwoffii_c	g__acinetobacter	f__moraxellaceae	o__pseudomonadales	c__gammaproteobacteria	p__proteobacteria	d__bacteria	TRUE	TRUE	6.9e-09	TRUE	1	GATCACCTCCTTAAC	CAAACACTACGGGGGTATCTTTGA	-7.869
GCF_001704615.3	s__acinetobacter defluvii	g__acinetobacter	f__moraxellaceae	o__pseudomonadales	c__gammaproteobacteria	p__proteobacteria	d__bacteria	TRUE	TRUE	2.8e-07	TRUE	1	GATCACCTCCTTAAC	CTAACACTACGGGGGTATCTTTGA	-7.869
GCF_001704115.1	s__acinetobacter larvae	g__acinetobacter	f__moraxellaceae	o__pseudomonadales	c__gammaproteobacteria	p__proteobacteria	d__bacteria	TRUE	TRUE	1.1e-07	TRUE	1	GATCACCTCCTTAAC	CAAACACTACGGGGGTATCTTTGA	-7.869
GCF_015218165.1	s__acinetobacter piscicola_a	g__acinetobacter	f__moraxellaceae	o__pseudomonadales	c__gammaproteobacteria	p__proteobacteria	d__bacteria	TRUE	TRUE	2.8e-07	TRUE	1	GATCACCTCCTTAAC	CTTACACTACGGGGGTATCTTTGA	-7.869
GCF_900636745.1	s__actinobacillus equuli	g__actinobacillus	f__pasteurellaceae	o__enterobacterales	c__gammaproteobacteria	p__proteobacteria	d__bacteria	TRUE	TRUE	1.5e-09	TRUE	1	GATCACCTCCTTACC	AACGTACTTCGGGGGTATCTTTGA	-7.869
GCF_000739435.1	s__actinobacillus suis	g__actinobacillus	f__pasteurellaceae	o__enterobacterales	c__gammaproteobacteria	p__proteobacteria	d__bacteria	TRUE	TRUE	1.5e-09	TRUE	1	GATCACCTCCTTACC	AACGTACTTCGGGGGTATCTTTGA	-7.869
GCF_900638385.1	s__actinobacillus_c delphinicola	g__actinobacillus_c	f__pasteurellaceae	o__enterobacterales	c__gammaproteobacteria	p__proteobacteria	d__bacteria	TRUE	TRUE	1.3e-09	TRUE	1	GATCACCTCCTTACC	CAGTCAATTCGGGGGTATCTTTGA	-7.869
GCF_017798005.1	s__aggregatibacter sp000466335	g__aggregatibacter	f__pasteurellaceae	o__enterobacterales	c__gammaproteobacteria	p__proteobacteria	d__bacteria	TRUE	TRUE	8.4e-10	TRUE	1	GATCACCTCCTTACC	TCCGTGCTTCGGGGGTATCTTTGA	-7.869
GCF_900636915.1	s__aggregatibacter aphrophilus	g__aggregatibacter	f__pasteurellaceae	o__enterobacterales	c__gammaproteobacteria	p__proteobacteria	d__bacteria	TRUE	TRUE	8.4e-10	TRUE	1	GATCACCTCCTTACC	TCTGTGCTTCGGGGGTATCTTTGA	-7.869
GCF_000022145.1	s__anaeromyxobacter dehalogenans	g__anaeromyxobacter	f__anaeromyxobacteraceae	o__myxococcales	c__myxococcia	p__myxococcota	d__bacteria	TRUE	TRUE	1e-06	TRUE	1	GATCACCTCCTTTCT	GAGGCGCTCCGGGGGTCGCTTTGA	-7.869
GCF_000017505.1	s__anaeromyxobacter sp000017505	g__anaeromyxobacter	f__anaeromyxobacteraceae	o__myxococcales	c__myxococcia	p__myxococcota	d__bacteria	TRUE	TRUE	2.5e-06	TRUE	1	GATCACCTCCTTTCT	GAGGCGCTCCGGGGGTCCCTTTGA	-7.869
GCF_000013385.1	s__anaeromyxobacter dehalogenans_b	g__anaeromyxobacter	f__anaeromyxobacteraceae	o__myxococcales	c__myxococcia	p__myxococcota	d__bacteria	TRUE	TRUE	1.5e-06	TRUE	1	GATCACCTCCTTTCT	GAGGCGCTCCGGGGGTCGCTTTGA	-7.869
GCF_902459475.1	s__aquicella lusitana	g__aquicella		o__dsm-16500	c__gammaproteobacteria	p__proteobacteria	d__bacteria	TRUE	TRUE	5.5e-08	TRUE	1	GATCACCTCCTTACT	GACAGCATTTGGGGGTATCTTTGA	-7.869
GCF_902459485.1	s__aquicella_a siphonis	g__aquicella_a		o__dsm-16500	c__gammaproteobacteria	p__proteobacteria	d__bacteria	TRUE	TRUE	8e-07	TRUE	1	GATCACCTCCTTACT	GACGGTATCTGGGGGTATCTTTGA	-7.869
GCF_002217795.2	s__aquitalea magnusonii_b	g__aquitalea	f__chromobacteriaceae	o__burkholderiales	c__gammaproteobacteria	p__proteobacteria	d__bacteria	TRUE	TRUE	8.1e-08	TRUE	1	GATCACCTCCTTTCT	GCCGATATTCGGGGGTATCTTTGA	-7.869
GCF_009856625.1	s__aquitalea denitrificans	g__aquitalea	f__chromobacteriaceae	o__burkholderiales	c__gammaproteobacteria	p__proteobacteria	d__bacteria	TRUE	TRUE	8.1e-08	TRUE	1	GATCACCTCCTTTCT	GCCGATATTCGGGGGTATCTTTGA	-7.869
GCF_005155025.1	s__aquitalea aquatilis	g__aquitalea	f__chromobacteriaceae	o__burkholderiales	c__gammaproteobacteria	p__proteobacteria	d__bacteria	TRUE	TRUE	1e-07	TRUE	1	GATCACCTCCTTTCT	ACCGATATTCGGGGGTATCTTTGA	-7.869
GCF_000380335.1	s__azotobacter vinelandii	g__azotobacter	f__pseudomonadaceae	o__pseudomonadales	c__gammaproteobacteria	p__proteobacteria	d__bacteria	TRUE	TRUE	3.7e-10	TRUE	1	GATCACCTCCTTAAT	CAGACCATTCGGGGGTATCTTTGA	-7.869
GCF_009363155.1	s__azotobacter salinestris	g__azotobacter	f__pseudomonadaceae	o__pseudomonadales	c__gammaproteobacteria	p__proteobacteria	d__bacteria	TRUE	TRUE	3.7e-10	TRUE	1	GATCACCTCCTTAAT	CAGACCATTCGGGGGTATCTTTGA	-7.869
GCF_006874625.1	s__bdellovibrio sp006874625	g__bdellovibrio	f__bdellovibrionaceae	o__bdellovibrionales	c__bdellovibrionia	p__bdellovibrionota	d__bacteria	TRUE	TRUE	2.6e-06	TRUE	1	GATCACCTCCTTTCT	CAGGAGCTCCGGGGGTATCTTTGA	-7.869
GCF_013752535.1	s__bdellovibrio sp013752535	g__bdellovibrio	f__bdellovibrionaceae	o__bdellovibrionales	c__bdellovibrionia	p__bdellovibrionota	d__bacteria	TRUE	TRUE	1.4e-06	TRUE	1	GATCACCTCCTTTCT	AAGGAGCTTCGGGGGTATCTTTGA	-7.869
GCF_006874645.1	s__bdellovibrio sp006874645	g__bdellovibrio	f__bdellovibrionaceae	o__bdellovibrionales	c__bdellovibrionia	p__bdellovibrionota	d__bacteria	TRUE	TRUE	1.4e-06	TRUE	1	GATCACCTCCTTTCT	AAGGAGCTTCGGGGGTATCTTTGA	-7.869
GCF_000317895.1	s__bdellovibrio bacteriovorus_f	g__bdellovibrio	f__bdellovibrionaceae	o__bdellovibrionales	c__bdellovibrionia	p__bdellovibrionota	d__bacteria	TRUE	TRUE	1.9e-06	TRUE	1	GATCACCTCCTTTCT	AAGGAGCTTCGGGGGTATCTTTGA	-7.869
GCF_002208115.1	s__bdellovibrio bacteriovorus_c	g__bdellovibrio	f__bdellovibrionaceae	o__bdellovibrionales	c__bdellovibrionia	p__bdellovibrionota	d__bacteria	TRUE	TRUE	1.9e-06	TRUE	1	GATCACCTCCTTTCT	AAGGAGCTTCGGGGGTATCTTTGA	-7.869
GCF_000196175.1	s__bdellovibrio bacteriovorus	g__bdellovibrio	f__bdellovibrionaceae	o__bdellovibrionales	c__bdellovibrionia	p__bdellovibrionota	d__bacteria	TRUE	TRUE	1.9e-06	TRUE	1	GATCACCTCCTTTCT	AAGGAGCTTCGGGGGTATCTTTGA	-7.869
GCF_000067205.1	s__bordetella_a petrii	g__bordetella_a	f__burkholderiaceae	o__burkholderiales	c__gammaproteobacteria	p__proteobacteria	d__bacteria	TRUE	TRUE	9.2e-06	TRUE	1	GATCACCTCCTTTAA	CAGGCGCTACGGGGGTATCTTTGA	-7.869
GCF_002119665.1	s__bordetella_b sp002119665	g__bordetella_b	f__burkholderiaceae	o__burkholderiales	c__gammaproteobacteria	p__proteobacteria	d__bacteria	TRUE	TRUE	2.5e-05	TRUE	1	GATCACCTCCTTTAA	CTGGCGTTACGGGGGTATCTTTGA	-7.869
GCF_000959245.1	s__burkholderia ubonensis	g__burkholderia	f__burkholderiaceae	o__burkholderiales	c__gammaproteobacteria	p__proteobacteria	d__bacteria	TRUE	TRUE	2.2e-06	TRUE	1	GATCACCTCCTTTCC	GGCGAGCTTCGGGGGTATCTTTGA	-7.869
GCF_001522585.2	s__burkholderia sp001522585	g__burkholderia	f__burkholderiaceae	o__burkholderiales	c__gammaproteobacteria	p__proteobacteria	d__bacteria	TRUE	TRUE	2.2e-06	TRUE	1	GATCACCTCCTTTCC	GGCGAGCTTCGGGGGTATCTTTGA	-7.869
GCF_001718795.1	s__burkholderia latens_a	g__burkholderia	f__burkholderiaceae	o__burkholderiales	c__gammaproteobacteria	p__proteobacteria	d__bacteria	TRUE	TRUE	2.2e-06	TRUE	1	GATCACCTCCTTTCC	GGCGAGCTTCGGGGGTATCTTTGA	-7.869
GCF_000203915.1	s__burkholderia ambifaria	g__burkholderia	f__burkholderiaceae	o__burkholderiales	c__gammaproteobacteria	p__proteobacteria	d__bacteria	TRUE	TRUE	4.3e-06	TRUE	1	GATCACCTCCTTTCC	GGCGAGCTTCGGGGGTATCTTTGA	-7.869
GCF_001411495.1	s__burkholderia cepacia	g__burkholderia	f__burkholderiaceae	o__burkholderiales	c__gammaproteobacteria	p__proteobacteria	d__bacteria	TRUE	TRUE	2.2e-06	TRUE	1	GATCACCTCCTTTCC	GGCGAGCTCCGGGGGTATCTTTGA	-7.869
GCF_016899425.1	s__burkholderia sp002223185	g__burkholderia	f__burkholderiaceae	o__burkholderiales	c__gammaproteobacteria	p__proteobacteria	d__bacteria	TRUE	TRUE	2.2e-06	TRUE	1	GATCACCTCCTTTCC	GGCGAGCTTCGGGGGTATCTTTGA	-7.869
GCF_001742165.1	s__burkholderia stabilis	g__burkholderia	f__burkholderiaceae	o__burkholderiales	c__gammaproteobacteria	p__proteobacteria	d__bacteria	TRUE	TRUE	2.2e-06	TRUE	1	GATCACCTCCTTTCC	GGCGAGCTTCGGGGGTATCTTTGA	-7.869
GCF_000959445.1	s__burkholderia vietnamiensis	g__burkholderia	f__burkholderiaceae	o__burkholderiales	c__gammaproteobacteria	p__proteobacteria	d__bacteria	TRUE	TRUE	2.2e-06	TRUE	1	GATCACCTCCTTTCC	GGCGAGCTTCGGGGGTATCTTTGA	-7.869
GCF_000959525.1	s__burkholderia multivorans	g__burkholderia	f__burkholderiaceae	o__burkholderiales	c__gammaproteobacteria	p__proteobacteria	d__bacteria	TRUE	TRUE	4.3e-06	TRUE	1	GATCACCTCCTTTCC	GGCGAGCTTCGGGGGTATCTTTGA	-7.869
GCF_001718315.1	s__burkholderia diffusa_b	g__burkholderia	f__burkholderiaceae	o__burkholderiales	c__gammaproteobacteria	p__proteobacteria	d__bacteria	TRUE	TRUE	4.3e-06	TRUE	1	GATCACCTCCTTTCC	GGCGAGCTTCGGGGGTATCTTTGA	-7.869
GCF_001028665.1	s__burkholderia pyrrocinia	g__burkholderia	f__burkholderiaceae	o__burkholderiales	c__gammaproteobacteria	p__proteobacteria	d__bacteria	TRUE	TRUE	2.2e-06	TRUE	1	GATCACCTCCTTTCC	GGCGAGCTCCGGGGGTATCTTTGA	-7.869
GCF_001718835.1	s__burkholderia cepacia_f	g__burkholderia	f__burkholderiaceae	o__burkholderiales	c__gammaproteobacteria	p__proteobacteria	d__bacteria	TRUE	TRUE	2.2e-06	TRUE	1	GATCACCTCCTTTCC	GGCGAGCTTCGGGGGTATCTTTGA	-7.869
GCF_000012365.1	s__burkholderia thailandensis	g__burkholderia	f__burkholderiaceae	o__burkholderiales	c__gammaproteobacteria	p__proteobacteria	d__bacteria	TRUE	TRUE	8.6e-07	TRUE	1	GATCACCTCCTTTCT	GGCGAGCTACGGGGGTATCTTTGA	-7.869
GCF_001411805.1	s__burkholderia plantarii	g__burkholderia	f__burkholderiaceae	o__burkholderiales	c__gammaproteobacteria	p__proteobacteria	d__bacteria	TRUE	TRUE	1.3e-06	TRUE	1	GATCACCTCCTTTCT	GGCGAGCTACGGGGGTATCTTTGA	-7.869
GCF_002097715.1	s__burkholderia acidophila	g__burkholderia	f__burkholderiaceae	o__burkholderiales	c__gammaproteobacteria	p__proteobacteria	d__bacteria	TRUE	TRUE	2.2e-06	TRUE	1	GATCACCTCCTTTCT	GGCGAGCTTCGGGGGTATCTTTGA	-7.869
GCF_003330765.1	s__burkholderia pyrrocinia_b	g__burkholderia	f__burkholderiaceae	o__burkholderiales	c__gammaproteobacteria	p__proteobacteria	d__bacteria	TRUE	TRUE	7.4e-06	TRUE	1	GATCACCTCCTTTCT	GGCGAGCTTCGGGGGTATCTTTGA	-7.869
GCF_001524625.2	s__burkholderia sp001524625	g__burkholderia	f__burkholderiaceae	o__burkholderiales	c__gammaproteobacteria	p__proteobacteria	d__bacteria	TRUE	TRUE	8.6e-07	TRUE	1	GATCACCTCCTTTCT	GGCGAGCTACGGGGGTATCTTTGA	-7.869
GCF_000011705.1	s__burkholderia mallei	g__burkholderia	f__burkholderiaceae	o__burkholderiales	c__gammaproteobacteria	p__proteobacteria	d__bacteria	TRUE	TRUE	8.6e-07	TRUE	1	GATCACCTCCTTTCT	GGCGAGCTACGGGGGTATCTTTGA	-7.869
GCF_000959725.1	s__burkholderia gladioli	g__burkholderia	f__burkholderiaceae	o__burkholderiales	c__gammaproteobacteria	p__proteobacteria	d__bacteria	TRUE	TRUE	8.6e-07	TRUE	1	GATCACCTCCTTTCT	GGCGAGCTACGGGGGTATCTTTGA	-7.869
GCF_000960995.1	s__burkholderia glumae	g__burkholderia	f__burkholderiaceae	o__burkholderiales	c__gammaproteobacteria	p__proteobacteria	d__bacteria	TRUE	TRUE	1.3e-06	TRUE	1	GATCACCTCCTTTCT	GGCGAGCTACGGGGGTATCTTTGA	-7.869
GCF_000959365.1	s__burkholderia oklahomensis	g__burkholderia	f__burkholderiaceae	o__burkholderiales	c__gammaproteobacteria	p__proteobacteria	d__bacteria	TRUE	TRUE	8.6e-07	TRUE	1	GATCACCTCCTTTCT	GGCGAGCTACGGGGGTATCTTTGA	-7.869
GCF_011493005.1	s__caballeronia sp011493005	g__caballeronia	f__burkholderiaceae	o__burkholderiales	c__gammaproteobacteria	p__proteobacteria	d__bacteria	TRUE	TRUE	2.2e-07	TRUE	1	GATCACCTCCTTTCT	GGCGAGCTCCGGGGGTATCTTTGA	-7.869
GCF_017220215.1	s__caballeronia sp902833455	g__caballeronia	f__burkholderiaceae	o__burkholderiales	c__gammaproteobacteria	p__proteobacteria	d__bacteria	TRUE	TRUE	7.9e-07	TRUE	1	GATCACCTCCTTTCT	GGCGAGCTACGGGGGTATCTTTGA	-7.869
GCF_000402035.1	s__caballeronia insecticola	g__caballeronia	f__burkholderiaceae	o__burkholderiales	c__gammaproteobacteria	p__proteobacteria	d__bacteria	TRUE	TRUE	7.9e-07	TRUE	1	GATCACCTCCTTTCT	GGCGAGCTACGGGGGTATCTTTGA	-7.869
GCF_001557535.2	s__caballeronia sp001557535	g__caballeronia	f__burkholderiaceae	o__burkholderiales	c__gammaproteobacteria	p__proteobacteria	d__bacteria	TRUE	TRUE	1.5e-07	TRUE	1	GATCACCTCCTTTCT	GGCGAGCTCCGGGGGTATCTTTGA	-7.869
GCF_009746125.1	s__casimicrobium huifangae	g__casimicrobium	f__casimicrobiaceae	o__burkholderiales	c__gammaproteobacteria	p__proteobacteria	d__bacteria	TRUE	TRUE	0.029	TRUE	1	GATCACCTCCTTTCT	GACGAACTTCGGGGGTTACTTTGA	-7.869
GCF_000020505.1	s__chlorobaculum parvum_a	g__chlorobaculum	f__chlorobiaceae	o__chlorobiales	c__chlorobia	p__bacteroidota	d__bacteria	TRUE	TRUE	3.1e-06	TRUE	1	GATCACCTCCTTTTA	AACCAGTTACGGGGGTATCTTTAA	-7.869
GCF_001747405.1	s__chlorobaculum limnaeum	g__chlorobaculum	f__chlorobiaceae	o__chlorobiales	c__chlorobia	p__bacteroidota	d__bacteria	TRUE	TRUE	3.1e-06	TRUE	1	GATCACCTCCTTTTA	GATCAGTTACGGGGGTATCTTTGA	-7.869
GCF_000006985.1	s__chlorobaculum tepidum	g__chlorobaculum	f__chlorobiaceae	o__chlorobiales	c__chlorobia	p__bacteroidota	d__bacteria	TRUE	TRUE	6.7e-06	TRUE	1	GATCACCTCCTTTTA	AACCAGTTACGGGGGTATCTTTAA	-7.869
GCF_000015125.1	s__chlorobium phaeobacteroides	g__chlorobium	f__chlorobiaceae	o__chlorobiales	c__chlorobia	p__bacteroidota	d__bacteria	TRUE	TRUE	7.3e-07	TRUE	1	GATCACCTCCTTTCA	GACCAGTTACGGGGGTATCTTTGA	-7.869
GCF_000020645.1	s__chlorobium phaeoclathratiforme	g__chlorobium	f__chlorobiaceae	o__chlorobiales	c__chlorobia	p__bacteroidota	d__bacteria	TRUE	TRUE	4.1e-07	TRUE	1	GATCACCTCCTTTCA	GAACAGTTACGGGGGTATCTTTGA	-7.869
GCF_000012485.1	s__chlorobium luteolum	g__chlorobium	f__chlorobiaceae	o__chlorobiales	c__chlorobia	p__bacteroidota	d__bacteria	TRUE	TRUE	1.2e-07	TRUE	1	GATCACCTCCTTTTA	GAACAGTTACGGGGGTATCTTTGA	-7.869
GCF_000020465.1	s__chlorobium limicola	g__chlorobium	f__chlorobiaceae	o__chlorobiales	c__chlorobia	p__bacteroidota	d__bacteria	TRUE	TRUE	8e-08	TRUE	1	GATCACCTCCTTTTA	GATCAGTTACGGGGGTATCTTTGA	-7.869
GCF_002240205.1	s__chlorobium_a sp002240205	g__chlorobium_a	f__chlorobiaceae	o__chlorobiales	c__chlorobia	p__bacteroidota	d__bacteria	TRUE	TRUE	1.6e-06	TRUE	1	GATCACCTCCTTTTA	GAACAGTTACGGGGGTATCTTTGA	-7.869
GCF_000020525.1	s__chloroherpeton thalassium	g__chloroherpeton	f__chloroherpetonaceae	o__chlorobiales	c__chlorobia	p__bacteroidota	d__bacteria	TRUE	TRUE	2.5e-05	TRUE	1	GATCACCTCCTTTCT	TCTTTGCTACGGGGGTTTCTTTGA	-7.869
GCF_008275125.1	s__chromobacterium paludis	g__chromobacterium	f__chromobacteriaceae	o__burkholderiales	c__gammaproteobacteria	p__proteobacteria	d__bacteria	TRUE	TRUE	1.7e-08	TRUE	1	GATCACCTCCTTTCT	GCCGATATTCGGGGGTATCTTTGA	-7.869
GCF_000007705.1	s__chromobacterium violaceum	g__chromobacterium	f__chromobacteriaceae	o__burkholderiales	c__gammaproteobacteria	p__proteobacteria	d__bacteria	TRUE	TRUE	1.7e-08	TRUE	1	GATCACCTCCTTTCT	GCCGACATTCGGGGGTATCTTTGA	-7.869
GCF_003325475.1	s__chromobacterium phragmitis	g__chromobacterium	f__chromobacteriaceae	o__burkholderiales	c__gammaproteobacteria	p__proteobacteria	d__bacteria	TRUE	TRUE	1.7e-08	TRUE	1	GATCACCTCCTTTCT	GCCGATATTCGGGGGTATCTTTGA	-7.869
GCF_002848345.1	s__chromobacterium sp002848345	g__chromobacterium	f__chromobacteriaceae	o__burkholderiales	c__gammaproteobacteria	p__proteobacteria	d__bacteria	TRUE	TRUE	3.3e-08	TRUE	1	GATCACCTCCTTTCT	GCCGATATTCGGGGGTATCTTTGA	-7.869
GCF_003971255.1	s__cognaticolwellia sp003971255	g__cognaticolwellia	f__alteromonadaceae	o__enterobacterales	c__gammaproteobacteria	p__proteobacteria	d__bacteria	TRUE	TRUE	2.8e-08	TRUE	1	GATCACCTCCTTATC	ACCATGCTTCGGGGGTACCTTTGA	-7.869
GCF_002076895.1	s__cognaticolwellia beringensis	g__cognaticolwellia	f__alteromonadaceae	o__enterobacterales	c__gammaproteobacteria	p__proteobacteria	d__bacteria	TRUE	TRUE	1.5e-09	TRUE	1	GATCACCTCCTTATC	AATTTGCTTCGGGGGTACCTTTGA	-7.869
GCF_009832865.1	s__colwellia sp009832865	g__colwellia	f__alteromonadaceae	o__enterobacterales	c__gammaproteobacteria	p__proteobacteria	d__bacteria	TRUE	TRUE	1.9e-09	TRUE	1	GATCACCTCCTTATC	GACCTACTTCGGGGGTACCTTTGA	-7.869
GCF_000012325.1	s__colwellia psychrerythraea_a	g__colwellia	f__alteromonadaceae	o__enterobacterales	c__gammaproteobacteria	p__proteobacteria	d__bacteria	TRUE	TRUE	8.1e-09	TRUE	1	GATCACCTCCTTATC	AATTTGCTTCGGGGGTACCTTTGA	-7.869
GCF_001767295.1	s__colwellia_a sp001767295	g__colwellia_a	f__alteromonadaceae	o__enterobacterales	c__gammaproteobacteria	p__proteobacteria	d__bacteria	TRUE	TRUE	6e-08	TRUE	1	GATCACCTCCTTATC	GATATGCTTCGGGGGTATCTTTGA	-7.869
GCF_002158865.1	s__comamonas_e serinivorans	g__comamonas_e	f__burkholderiaceae	o__burkholderiales	c__gammaproteobacteria	p__proteobacteria	d__bacteria	TRUE	TRUE	8.8e-09	TRUE	1	GATCACCTCCTTTCT	GAGGCGCTACGGGGGTATCTTTGA	-7.869
GCF_001050475.1	s__companilactobacillus ginsenosidimutans	g__companilactobacillus	f__lactobacillaceae	o__lactobacillales	c__bacilli	p__firmicutes	d__bacteria	TRUE	TRUE	8.4e-07	TRUE	1	GATCACCTCCTTTCT	AATCAGTTCCGGGGGTCTCTTTGA	-7.869
GCF_005280755.1	s__coxiella burnetii	g__coxiella	f__coxiellaceae	o__coxiellales	c__gammaproteobacteria	p__proteobacteria	d__bacteria	TRUE	TRUE	3.4e-07	TRUE	1	GATCACCTCCTTACT	GACGCCTTGCGGGGGTATCTTTGA	-7.869
GCF_008801925.2	s__cupriavidus basilensis	g__cupriavidus	f__burkholderiaceae	o__burkholderiales	c__gammaproteobacteria	p__proteobacteria	d__bacteria	TRUE	TRUE	9.8e-08	TRUE	1	GATCACCTCCTTTCA	GAAGATCTACGGGGGTATCTTTGA	-7.869
GCF_008693385.1	s__cupriavidus pauculus_d	g__cupriavidus	f__burkholderiaceae	o__burkholderiales	c__gammaproteobacteria	p__proteobacteria	d__bacteria	TRUE	TRUE	9.8e-08	TRUE	1	GATCACCTCCTTTCC	GAAGATCTACGGGGGTATCTTTGA	-7.869
GCF_003854935.1	s__cupriavidus pauculus_c	g__cupriavidus	f__burkholderiaceae	o__burkholderiales	c__gammaproteobacteria	p__proteobacteria	d__bacteria	TRUE	TRUE	9.8e-08	TRUE	1	GATCACCTCCTTTCC	GAAGATCTACGGGGGTATCTTTGA	-7.869
GCF_001854325.1	s__cupriavidus malaysiensis	g__cupriavidus	f__burkholderiaceae	o__burkholderiales	c__gammaproteobacteria	p__proteobacteria	d__bacteria	TRUE	TRUE	9.8e-08	TRUE	1	GATCACCTCCTTTCC	GAAGATCTACGGGGGTATCTTTGA	-7.869
GCF_000196015.1	s__cupriavidus metallidurans	g__cupriavidus	f__burkholderiaceae	o__burkholderiales	c__gammaproteobacteria	p__proteobacteria	d__bacteria	TRUE	TRUE	9.8e-08	TRUE	1	GATCACCTCCTTTCT	GAAGATCTACGGGGGTATCTTTGA	-7.869
GCF_001632775.1	s__dokdonella koreensis	g__dokdonella	f__rhodanobacteraceae	o__xanthomonadales	c__gammaproteobacteria	p__proteobacteria	d__bacteria	TRUE	TRUE	1.6e-08	TRUE	1	GATCACCTCCTTTCG	GTCTCGCTACGGGGGTATCTTTGA	-7.869
GCF_016653615.1	s__entomomonas sp016653615	g__entomomonas	f__pseudomonadaceae	o__pseudomonadales	c__gammaproteobacteria	p__proteobacteria	d__bacteria	TRUE	TRUE	3.7e-10	TRUE	1	GATCACCTCCTTAAA	GAAGCTATTCGGGGGTATCTTTGA	-7.869
GCF_003991975.1	s__entomomonas moraniae	g__entomomonas	f__pseudomonadaceae	o__pseudomonadales	c__gammaproteobacteria	p__proteobacteria	d__bacteria	TRUE	TRUE	2.7e-09	TRUE	1	GATCACCTCCTTAAA	GAAGCTATTCGGGGGTATCTTTGA	-7.869
GCF_018141005.1	s__erwinia sp001422605	g__erwinia	f__enterobacteriaceae	o__enterobacterales	c__gammaproteobacteria	p__proteobacteria	d__bacteria	TRUE	TRUE	6.8e-10	TRUE	1	GATCACCTCCTTACC	GACGTTCTTCGGGGGTATCTTTGA	-7.869
GCF_009738185.1	s__erwinia sp009738185	g__erwinia	f__enterobacteriaceae	o__enterobacterales	c__gammaproteobacteria	p__proteobacteria	d__bacteria	TRUE	TRUE	7.9e-10	TRUE	1	GATCACCTCCTTACC	AGCGTTCTTCGGGGGTATCTTTGA	-7.869
GCF_016469335.1	s__flocculibacter collagenilyticus	g__flocculibacter	f__alteromonadaceae	o__enterobacterales	c__gammaproteobacteria	p__proteobacteria	d__bacteria	TRUE	TRUE	2.8e-09	TRUE	1	GATCACCTCCTTACC	GATGTACTTCGGGGGTATCTTTGA	-7.869
GCF_011455495.1	s__frederiksenia canicola	g__frederiksenia	f__pasteurellaceae	o__enterobacterales	c__gammaproteobacteria	p__proteobacteria	d__bacteria	TRUE	TRUE	4.7e-08	TRUE	1	GATCACCTCCTTACC	GCAATGTTACGGGGGTATCTTTGA	-7.869
GCF_000807275.1	s__frischella perrara	g__frischella	f__enterobacteriaceae	o__enterobacterales	c__gammaproteobacteria	p__proteobacteria	d__bacteria	TRUE	TRUE	4.4e-10	TRUE	1	GATCACCTCCTTACG	GCTGTTATACGGGGGTATCTTTGA	-7.869
GCF_017338855.1	s__geobacter sp017338855	g__geobacter	f__geobacteraceae	o__geobacterales	c__desulfuromonadia	p__desulfobacterota	d__bacteria	TRUE	TRUE	5.6e-07	TRUE	1	GATCACCTCCTTTCT	GCCAAGCTCCGGGGGTCTCTTTGA	-7.869
GCF_000817955.1	s__geobacter pickeringii	g__geobacter	f__geobacteraceae	o__geobacterales	c__desulfuromonadia	p__desulfobacterota	d__bacteria	TRUE	TRUE	1.7e-06	TRUE	1	GATCACCTCCTTTCT	GCCAAGCTCCGGGGGTCTCTTTGA	-7.869
GCF_000012925.1	s__geobacter metallireducens	g__geobacter	f__geobacteraceae	o__geobacterales	c__desulfuromonadia	p__desulfobacterota	d__bacteria	TRUE	TRUE	1.5e-06	TRUE	1	GATCACCTCCTTTCT	GCCAAGCTCCGGGGGTCTCTTTGA	-7.869
GCF_000007985.2	s__geobacter sulfurreducens	g__geobacter	f__geobacteraceae	o__geobacterales	c__desulfuromonadia	p__desulfobacterota	d__bacteria	TRUE	TRUE	0.00012	TRUE	1	GATCACCTCCTTTCT	GCCAAGCTCCGGGGGTCTCTTTGA	-7.869
GCF_019203205.1	s__geomonas sp019203205	g__geomonas	f__geobacteraceae	o__geobacterales	c__desulfuromonadia	p__desulfobacterota	d__bacteria	TRUE	TRUE	2.6e-05	TRUE	1	GATCACCTCCTTTCT	CACAAACTCCGGGGGTCTCTTTGA	-7.869
GCF_018986935.1	s__geomonas sp018986935	g__geomonas	f__geobacteraceae	o__geobacterales	c__desulfuromonadia	p__desulfobacterota	d__bacteria	TRUE	TRUE	2.3e-06	TRUE	1	GATCACCTCCTTTCT	CACAAGCTTCGGGGGTCTCTTTGA	-7.869
GCF_018986915.1	s__geomonas sp018986915	g__geomonas	f__geobacteraceae	o__geobacterales	c__desulfuromonadia	p__desulfobacterota	d__bacteria	TRUE	TRUE	2.3e-06	TRUE	1	GATCACCTCCTTTCT	CACAAACTTCGGGGGTCTCTTTGA	-7.869
GCF_000020725.1	s__geomonas bemidjiensis	g__geomonas	f__geobacteraceae	o__geobacterales	c__desulfuromonadia	p__desulfobacterota	d__bacteria	TRUE	TRUE	9.4e-07	TRUE	1	GATCACCTCCTTTCT	GACAAGCTCCGGGGGTCTCTTTGA	-7.869
GCF_000016745.1	s__geotalea uraniireducens	g__geotalea	f__geobacteraceae	o__geobacterales	c__desulfuromonadia	p__desulfobacterota	d__bacteria	TRUE	TRUE	7.4e-06	TRUE	1	GATCACCTCCTTTCT	AACAAGTTACGGGGGTCTCTTTGA	-7.869
GCF_000022265.1	s__geotalea daltonii	g__geotalea	f__geobacteraceae	o__geobacterales	c__desulfuromonadia	p__desulfobacterota	d__bacteria	TRUE	TRUE	4.9e-06	TRUE	1	GATCACCTCCTTTCT	AACAACTTACGGGGGTCTCTTTGA	-7.869
GCF_003008595.1	s__giesbergeria suum	g__giesbergeria	f__burkholderiaceae	o__burkholderiales	c__gammaproteobacteria	p__proteobacteria	d__bacteria	TRUE	TRUE	5.6e-07	TRUE	1	GATCACCTCCTTTCT	CGTGAGTTACGGGGGTATCTTTGA	-7.869
GCF_000599985.1	s__gilliamella apicola	g__gilliamella	f__enterobacteriaceae	o__enterobacterales	c__gammaproteobacteria	p__proteobacteria	d__bacteria	TRUE	TRUE	2.1e-09	TRUE	1	GATCACCTCCTTACG	AATGTGATTCGGGGGTATCTTTGA	-7.869
GCF_000226565.1	s__glaciecola nitratireducens	g__glaciecola	f__alteromonadaceae	o__enterobacterales	c__gammaproteobacteria	p__proteobacteria	d__bacteria	TRUE	TRUE	3.7e-09	TRUE	1	GATCACCTCCTTACT	GAATCACTTCGGGGGTATCTTTGA	-7.869
GCF_004519515.1	s__glaesserella indolica_a	g__glaesserella	f__pasteurellaceae	o__enterobacterales	c__gammaproteobacteria	p__proteobacteria	d__bacteria	TRUE	TRUE	1.2e-09	TRUE	1	GATCACCTCCTTACC	AACACACTTCGGGGGTATCTTTGA	-7.869
GCF_002215215.1	s__granulosicoccus antarcticus	g__granulosicoccus	f__granulosicoccaceae	o__granulosicoccales	c__gammaproteobacteria	p__proteobacteria	d__bacteria	TRUE	TRUE	3.4e-07	TRUE	1	GATCACCTCCTTAAA	GACTCCCTCCGGGGGTATCTTTGA	-7.869
GCF_009734265.1	s__guyparkeria halophila	g__guyparkeria	f__halothiobacillaceae	o__halothiobacillales	c__gammaproteobacteria	p__proteobacteria	d__bacteria	TRUE	TRUE	3.4e-09	TRUE	1	GATCACCTCCTTAAA	GAGTCGCTCCGGGGGTATCTTTAA	-7.869
GCF_900475755.1	s__haemophilus influenzae_d	g__haemophilus	f__pasteurellaceae	o__enterobacterales	c__gammaproteobacteria	p__proteobacteria	d__bacteria	TRUE	TRUE	1.2e-08	TRUE	1	GATCACCTCCTTACA	TCAGTGCTTCGGGGGTATCTTTGA	-7.869
GCF_900475885.1	s__haemophilus aegyptius	g__haemophilus	f__pasteurellaceae	o__enterobacterales	c__gammaproteobacteria	p__proteobacteria	d__bacteria	TRUE	TRUE	1.2e-08	TRUE	1	GATCACCTCCTTACC	TCAGTGCTTCGGGGGTATCTTTGA	-7.869
GCF_003352385.1	s__haemophilus haemolyticus_i	g__haemophilus	f__pasteurellaceae	o__enterobacterales	c__gammaproteobacteria	p__proteobacteria	d__bacteria	TRUE	TRUE	2e-09	TRUE	1	GATCACCTCCTTACC	TCGGTGCTTCGGGGGTATCTTTGA	-7.869
GCF_014931275.1	s__haemophilus_d sp900755445	g__haemophilus_d	f__pasteurellaceae	o__enterobacterales	c__gammaproteobacteria	p__proteobacteria	d__bacteria	TRUE	TRUE	9.4e-11	TRUE	1	GATCACCTCCTTACC	TCTGTGCTTCGGGGGTATCTTTGA	-7.869
GCF_900186995.1	s__haemophilus_d pittmaniae	g__haemophilus_d	f__pasteurellaceae	o__enterobacterales	c__gammaproteobacteria	p__proteobacteria	d__bacteria	TRUE	TRUE	3.1e-10	TRUE	1	GATCACCTCCTTACC	GATGTGCTTCGGGGGTATCTTTGA	-7.869
GCF_900638025.1	s__haemophilus_d parainfluenzae_j	g__haemophilus_d	f__pasteurellaceae	o__enterobacterales	c__gammaproteobacteria	p__proteobacteria	d__bacteria	TRUE	TRUE	9.4e-11	TRUE	1	GATCACCTCCTTACC	TCTGTGCTTCGGGGGTATCTTTGA	-7.869
GCF_000210895.1	s__haemophilus_d parainfluenzae_a	g__haemophilus_d	f__pasteurellaceae	o__enterobacterales	c__gammaproteobacteria	p__proteobacteria	d__bacteria	TRUE	TRUE	7.4e-10	TRUE	1	GATCACCTCCTTACC	TCTGTGCTTCGGGGGTATCTTTGA	-7.869
GCF_014931395.1	s__haemophilus_d sp900764435	g__haemophilus_d	f__pasteurellaceae	o__enterobacterales	c__gammaproteobacteria	p__proteobacteria	d__bacteria	TRUE	TRUE	1.2e-10	TRUE	1	GATCACCTCCTTACC	TCTGTGCTTCGGGGGTATCTTTGA	-7.869
GCF_000024765.1	s__halothiobacillus neapolitanus	g__halothiobacillus	f__halothiobacillaceae	o__halothiobacillales	c__gammaproteobacteria	p__proteobacteria	d__bacteria	TRUE	TRUE	8.7e-09	TRUE	1	GATCACCTCCTTTAA	GCCGCGCTTCGGGGGTATCTTTGA	-7.869
GCF_003339525.1	s__hydromonas cinctiostellae	g__hydromonas	f__burkholderiaceae	o__burkholderiales	c__gammaproteobacteria	p__proteobacteria	d__bacteria	TRUE	TRUE	3.4e-09	TRUE	1	GATCACCTCCTTTCT	CAAGCGCTATGGGGGTATCTTTGA	-7.869
GCF_002222655.1	s__ideonella filiformis	g__ideonella	f__burkholderiaceae	o__burkholderiales	c__gammaproteobacteria	p__proteobacteria	d__bacteria	TRUE	TRUE	6.2e-07	TRUE	1	GATCACCTCCTTTCT	GAAGCGCTACGGGGGTATCTTTGA	-7.869
GCF_001697225.1	s__immundisolibacter cernigliae	g__immundisolibacter	f__immundisolibacteraceae	o__immundisolibacterales	c__gammaproteobacteria	p__proteobacteria	d__bacteria	TRUE	TRUE	1.7e-06	TRUE	1	GATCACCTCCTTAAA	GCCACGCTACGGGGGTATCTTTGA	-7.869
GCF_005952805.1	s__inhella inkyongensis	g__inhella	f__burkholderiaceae	o__burkholderiales	c__gammaproteobacteria	p__proteobacteria	d__bacteria	TRUE	TRUE	1.6e-07	TRUE	1	GATCACCTCCTTTCT	GACGCGCTACGGGGGTATCTTTGA	-7.869
GCF_011745665.1	s__ipmb12 sp011745665	g__ipmb12	f__enterobacteriaceae	o__enterobacterales	c__gammaproteobacteria	p__proteobacteria	d__bacteria	TRUE	TRUE	2.4e-09	TRUE	1	GATCACCTCCTTACT	GCCGTGATTCGGGGGTATCTTTGA	-7.869
[truncated: 2,671 more rows]

## Sheet: Seqlogo Data
Species	prfB Frameshifting Call	Nuc Sequence	Prot Sequence
[truncated: 380 more rows]

## Sheet: Plasmid List
Plasmid name	Fusion name	Description	Reference
[truncated: 50 more rows]

## Sheet: Genome SD Analysis
Acc	Species	Genus	Family	Order	Class	Phylum	Domain	Average SD Strength ( )	Fraction SD Usage (FSD)
[truncated: 4,362 more rows]

[truncated: 5 more sheets: Fig2C data, Fig2D data, Fig3 data, Fig4 data, FigS7B data]
